# Supplementary material for: Forming cytoplasmic stress granules PURα suppresses mRNA translation initiation of IGFBP3 to promote esophageal squamous cell carcinoma progression
Source: PubMed Central journal article supplement (PMC9481463; doi:10.1038/s41388-022-02426-3), 2022-08-09
Supplement: 41388_2022_2426_MOESM1_ESM.pdf [file 41388_2022_2426_MOESM1_ESM.pdf]

# Forming cytoplasmic stress granules PUR $\alpha$ suppresses mRNA translation initiation of IGFBP3 to promote esophageal squamous cell carcinoma progression

Lusong Tian<sup>1\*</sup>, Xiufeng Xie<sup>1\*</sup>, Urmi Das<sup>2</sup>, Yuling Chen<sup>3</sup>, Yulin Sun<sup>1</sup>, Fang Liu<sup>1</sup>, Haizhen Lu<sup>4</sup>, Peng Nan<sup>1</sup>, Ying Zhu<sup>1</sup>, Xinglu Gu<sup>1</sup>, Haiteng Deng<sup>3</sup>, Jiuyong Xie<sup>2</sup>, Xiaohang Zhao<sup>1</sup>

<sup>1</sup>State Key Laboratory of Molecular Oncology, National Cancer Center/National Clinical Research Center for Cancer/Cancer Hospital, Chinese Academy of Medical Sciences and Peking Union Medical College, Beijing, China

<sup>2</sup>Department of Physiology & Pathophysiology, Max Rady College of Medicine, Rady Faculty of Health Sciences, University of Manitoba, Canada

<sup>3</sup>MOE Key Laboratory of Bioinformatics, Center for Synthetic and Systematic Biology, School of Life Sciences, Tsinghua University, Beijing, China

<sup>4</sup>Department of Pathology, National Cancer Center/Cancer Hospital, Chinese Academy of Medical Sciences and Peking Union Medical College, Beijing, China

## Supplementary Materials and Methods

### Supplementary Figures

**Supplementary Figure S1.** PUR $\alpha$  preferentially binds UG-/U-rich motifs

**Supplementary Figure S2.** PUR $\alpha$  inhibits IGFBP3 protein expression by binding to its 3'UTR.

**Supplementary Figure S3.** The sequence of IGFBP3 3'UTR and mutation was showed in psiCHECK<sup>TM</sup>-2 luciferase reporter.

**Supplementary Figure S4.** PUR $\alpha$ -interacting proteins are implicated in mRNA translation.

**Supplementary Figure S5.** Knockout of PUR $\alpha$  markedly inhibits ESCC progression *in vivo*.

### Supplementary Tables

**Supplementary Table S1.** Correlations between expression of cytoplasmic PUR $\alpha$  and clinicopathological features in ESCC patients

**Supplementary Table S2.** Description of high-quality reads in CLIP-seq

**Supplementary Table S3.** Description of uniquely mapped reads to the reference genome in CLIP-seq

**Supplementary Table S4.** Specific peaks bound to PUR $\alpha$  in CLIP-seq

**Supplementary Table S5.** PUR $\alpha$ -interacting proteins

**Supplementary Table S6.** Related resource information

## Supplementary Materials and Methods

### Cell culture

The human ESCC cell lines KYSE30, KYSE150, KYSE170 and KYSE510 were generously provided by Dr. Shimada (Hyogo College of Medicine, Hyogo, Japan), and esophageal epithelial cells Het-1A (Cat# CRL-2692) and HEK-293 (Cat#CRL-1573) were obtained from ATCC separately. The cells were cultured in RPMI 1640 medium supplemented with 10% fetal bovine serum (HyClone, Logan, UT, USA), 100 U/ml penicillin and 100 µg/ml streptomycin at 37°C with 5% CO<sub>2</sub>. All cell lines were authenticated by short tandem repeat (STR) analysis, and mycoplasma tests were negative.

### Plasmid construction and transfection

The cDNA encoding human *PURA* gene (NM\_005859) was cloned into the pCMV6-Myc-DDK-AC vector (OriGene, Rockville, MD, USA) to generate a recombinant vector. It was transiently transfected into cells with Lipofectamine 3000 (Thermo Fisher, Carlsbad, CA, USA). In addition, the cDNA of the human *PURA* gene was inserted into a lentiviral vector, Ubi-MCS-3FLAG-SV40-puromycin (GeneChem, Shanghai, China), to restore the expression of PURα in PURα-deficient KYSE170 cells.

For siRNA transfection, siRNAs targeting human *IGFBP3*, *PURA* and *PABPC1* were designed and synthesized by GenePharma (Shanghai, China). The specific target sequences of the siRNAs are listed in [Supplementary Table S6](#). Then,  $5 \times 10^5$  cells were plated in a 6-well plate and incubated at 37°C. When the cell confluence reached 50-60%, the cells were transfected with specific siRNA (100 pM) using Lipofectamine 2000 (Thermo Fisher).

### CRISPR/Cas9 mediated *PURA* gene KO cell line

Guide RNAs (gRNAs) targeting the human *PURA* gene were first designed using the CRISPR design tool (<http://cripor.tefor.net>) (sgRNA 1:

TGGGGCACCCCGGCTCGGGC; sgRNA 2: AGCGGGTGGACATCCAGAAC) and cloned into the pVG-U6-gRNA-CMV-spCas9-Puro vector (Vigene Biosciences, Shandong, China). Then,  $4 \times 10^5$  KYSE170 cells were plated in 6-well plates and cultured at 37°C with 5% CO<sub>2</sub>. When the cell confluence reached 80%, the cells were transfected with the sgRNA vectors. Forty-eight hours after transfection, cell culture medium containing 4 µg/ml puromycin was added to a 6-well plate to screen specific cells successfully transfected with the recombinant sgRNA vector. Next, single clones were expanded and verified by PCR. Finally, the PUR $\alpha$ -deficient KYSE170 cell line was constructed.

### **Coimmunoprecipitation assay**

Dynabeads Protein G (Thermo Fisher Scientific) were resuspended thoroughly to obtain a homogeneous suspension, and 50 µl of Dynabeads Protein G were transferred to a 1.5 ml eppendorf tube at room temperature (RT). Then, the tube was placed on a magnet for 1 min, the supernatant was discarded, and 1 ml of citrate-phosphate buffer (pH 5.0) was added to wash the Dynabeads Protein G. Then, 10 µg of anti-PUR $\alpha$  antibody (Abcam, Cat# ab125200) or rabbit IgG was added to 200 µl of PBS solution with 0.2% Tween, and the resulting mixture was transferred to prepared magnetic beads and incubated for 1.5 h RT with end-over-end rotation. The Dynabeads Protein G-Ig complex was washed twice in 1 ml of 0.2 M triethanolamine (pH 8.2) and incubated in 1 ml of fresh 0.2 M triethanolamine (pH 8.2) with 20 mM dimethyl pimelimidate (DMP $\times$ 2HCl) for 30 min RT to crosslink antibody to the beads with end-over-end rotation. Subsequently, the beads were incubated in 50 mM Tris (pH 7.5) for 15 min to stop the crosslinking. After this step, the tube was placed on the magnet, the supernatant was discarded, and the crosslinked beads were washed three times with 1 ml of PBS solution with 0.2% Tween-20. Next, 1 ml of 0.1 M glycine (pH 2.5) was added to remove the non-covalently bound antibodies. Then, 500 µl of the whole-cell extract was transferred to the tube with the Dynabeads-Ig complex and incubated overnight at 4°C with end-over-end rotation. After immunoprecipitation, the tube was placed on the magnet for 2 min to collect the Dynabeads Protein

G-Ig-antigen complex at the tube wall. The beads were then washed 5 times with 1 ml of 0.1% NP-40 lysis buffer supplemented with protease inhibitors. Finally, 50 µl of 2× Laemmli sample buffer with 50 mM DTT was added to the tube, and the tube was incubated at 100°C for 5 min to obtain a precipitated protein sample for SDS-PAGE. All specific antibodies are listed in [Supplementary Table S6](#).

### **Immunofluorescence assay**

Cells growing on coverslips in 6-well plates were fixed with paraformaldehyde (4%, w/v) for 20 min and permeabilized for 20 min with Triton X-100 (0.2%, v/v). Next, the cell samples were blocked with 2% (w/v) bovine serum albumin (BSA) for 1 h RT. The cells were then incubated overnight with the appropriate primary antibodies at 4°C. All specific antibodies are listed in [Supplementary Table S6](#). After this step, the cells were incubated with the corresponding fluorescent secondary antibodies RT for 1 h. Finally, the cell nuclei were stained with DAPI solution (Sigma-Aldrich, St. Louis, MO, USA). Fluorescence images were captured with a laser scanning confocal microscope (PerkinElmer).

### **Western blot analysis**

Cells were washed with PBS 3 times, lysed with RIPA buffer (50 mM Tris-HCl, pH 8.0, with 150 mM NaCl, 1.0% NP-40, 0.5% sodium deoxycholate, and 0.1% SDS) containing protease inhibitor cocktail (Roche) for 30 min, and sonicated. The cell lysates were prepared by centrifugation at 12 000 rpm for 15 min. Then, 25 µg of each protein sample was electrophoresed on 4%-20% gradient SDS-PAGE gels, and the separated proteins were transferred to polyvinylidene difluoride membranes (Millipore, Bedford, MA, USA) by electroblotting. The membranes were blocked for 1 h with nonfat dry milk in PBS (5%, w/v) and incubated with primary antibodies at 4°C overnight. All specific antibodies are listed in [Supplementary Table S6](#). The proteins were detected with horseradish peroxidase (HRP)-conjugated secondary antibodies and visualized with Renaissance Plus Reagent (Life Technologies, Grand Island, NY, USA).

### **RNA immunoprecipitation (RIP) assay**

RNA RIP assays were performed using a Magna RIP<sup>TM</sup> RNA-Binding Protein Immunoprecipitation Kit (Millipore) according to the manufacturer's instructions. Briefly, the cells were washed twice on 10 cm<sup>2</sup> plates with 10 ml of ice-cold PBS, scraped from each plate, and collected and lysed with RIP lysis buffer. Then, 50 µl of magnetic bead suspension was transferred to each tube, and 10 µg of anti-PURα or negative control rabbit IgG was added to each tube for immunoprecipitation. After crosslinking between the magnetic beads and the antibody, the RIP lysate was added to the bead-antibody complex in RIP immunoprecipitation buffer. For purification of RNA, all protein-RNA complexes were first incubated at 55°C for 30 min with shaking to digest the protein in proteinase K buffer. After incubation, the tubes were briefly centrifuged and placed on a magnetic separator to collect the supernatant containing RNA. Then, 850 µl of absolute ethanol with salt solution I, salt solution II, and precipitate enhancer was mixed with the aqueous phase containing RNA to collect the RNA, and the RNA pellets were resuspended in 20 µl of RNase-free water. Finally, the immunoprecipitated RNA was analyzed by PCR. The primer sequences are shown in [Supplementary Table S6](#).

### **RNA extraction, RT-PCR and quantitative PCR (qPCR) assays**

Total RNA was extracted using TRIzol reagent (Thermo Fisher), and reverse transcription was performed with a HiFiScript cDNA Synthesis Kit (CWbiotech, Jiangsu, China). qPCR was carried out on an ABI QuantStudio 5 device (Applied Biosystems, Foster City, CA, USA) using SYBR Green Real-Time PCR Master Mix (Takara). The relative mRNA expression levels were determined according to the cycle threshold (Ct) and were normalized against the ACTB levels using the  $2^{-\Delta\Delta Ct}$  formula. The primer sequences are shown in [Supplementary Table S6](#).

### **RNA fluorescence in situ hybridization (FISH)**

Cells growing on coverslips in 6-well plates were transiently transfected with

PURA-GFP with Lipofectamine 3000 (Thermo Fisher). Twenty-four hours after transfection, the cells were fixed with paraformaldehyde (4%, w/v) for 10 min and permeabilized for 5 min with Triton X-100 (0.2%, v/v). Then, 1 ml of 4% paraformaldehyde was added again, and the cells were washed twice with 1 ml of 1× PBS. Next, 1 ml of Wash Buffer A (Stellaris RNA FISH Wash Buffer A (Biosearch Technologies, Novato, CA, USA; Cat# SMF-WA1-60): nuclease-free water: deionized formamide = 2:7:1) was added to the 6-well plates, and the plates were incubated RT for 5 min. Within a humidified chamber, 100 µl of Hybridization Buffer [Stellaris RNA FISH Hybridization Buffer (Biosearch Technologies Cat# SMF-HB1-10): deionized formamide = 9:1] containing probes was dispensed onto the Parafilm. The probe sequences are listed in [Supplementary Table S6](#). The coverslips were gently transferred, cell side down, onto the 100 µl drop of hybridization buffer containing the probes and incubated in the dark at 37°C for 8 h. After hybridization, the coverslips were gently transferred to a fresh 6-well plate containing 1 ml of wash buffer A and incubated in the dark at 37°C for 30 min. Then, 1 ml of 6-diamidino-2-phenylindole (DAPI) nuclear stain was added, and the coverslips were incubated in the dark at 37°C for 30 min to counterstain the nuclei. Finally, the DAPI staining buffer was aspirated, 1 ml of wash buffer B was added, and the cells were incubated RT for 5 min. The RNA FISH images were captured with a laser scanning confocal microscope (PerkinElmer, Waltham, MA, USA).

### **Nascent RNA analysis**

Nascent RNA analysis was performed as previously reported <sup>[1]</sup>. First, 4-thiouridine (4sU) (Abcam, Waltham, MA, USA) was added to the cell culture medium to a final concentration of 1 mM and the RNA was labeled in a CO<sub>2</sub> incubator. After incubation for 30 min, total cellular RNA was isolated from the cells using TRIzol reagent (Thermo Fisher). For biotinylation of 4sU-labeled RNA, biotin-HPDP (Pierce) was mixed with 80 µg of total cellular RNA in biotinylation buffer, and the mixture was incubated RT for 1.5 h with rotation. The total cellular RNA containing biotinylated 4sU-labeled RNA was reprecipitated and collected. Then, denaturation of RNA

samples was performed at 65°C for 10 min followed by rapid cooling on ice for 5 min, and the biotinylated RNA was captured using  $\mu$ MACS streptavidin beads and columns (Miltenyi, Bergisch Gladbach, Germany). Finally, the labeled RNA was eluted with 100  $\mu$ l of freshly prepared 100 mM dithiothreitol (DTT) and recovered from the washing fractions using RNeasy MinElute Spin columns (Qiagen, Dusseldorf, Germany). The nascent RNA was analyzed by qPCR. The primer sequences are shown in [Supplementary Table S6](#).

### **Polysome profiling analysis**

Polysome profiling analysis was performed as previously reported <sup>[2]</sup>. In brief, the cells were plated in 10 cm dish and total lysate was prepared by scraping in hypotonic buffer (1% Triton X-100, 20 mM Tris-HCl (pH 7.4), 2.5 mM MgCl<sub>2</sub>, 150 mM NaCl, 1 mM DTT, 5 U/ml RNase inhibitor and protease inhibitor cocktail) supplemented with 0.1 mg/ml cycloheximide (CHX). Samples were centrifuged at 17000 g for 5 min at 4°C. Supernatants (cytosolic cell extracts) were collected and absorbance at 254 nm was measured. Approximately 20 OD<sub>260</sub> of lysate was layered over 10% - 50% cold sucrose gradients in buffer (20 mM Tris-HCl (pH 7.4), 2.5 mM MgCl<sub>2</sub>, 150 mM NaCl, 1 mM DTT, 5 U/ml RNase inhibitor and protease inhibitor cocktail). Gradients were centrifuged at 39000 rpm in a Beckman SW28 rotor for 2 h at 4°C. After centrifugation, placing sucrose gradients on Automated Density Fractionation System and proceeding with automated fractionation and collection of fractions (0.5 ml each), as described by the manufacturer. Collecting each fraction into individual eppendorf tubes with continuous monitoring of absorbance at 254 nm.

### **Cell proliferation assay**

For the cell proliferation assay, cells were seeded at a density of 1500 cells per well in 96-well plates and cultured for 6 days. Every day at the same time, a total of 100  $\mu$ l of serum-free medium containing 10  $\mu$ l of Cell Counting Kit-8 (CCK-8) reagent (Biosharp, Anhui, China) was added to each well, and the cells were incubated for 1 h. Then, the absorbance at 450 nm was measured using a microplate reader to evaluate

cell viability. This experiment was performed in triplicate, and the results are presented as the mean  $\pm$  SEM.

### **Cell migration and invasion assay**

A cell migration and invasion assay was performed as described previously<sup>[3]</sup>. In brief,  $5 \times 10^4$  cells were added to the upper chamber in 100  $\mu$ l of serum-free RPMI 1640 medium, and 600  $\mu$ l of RPMI 1640 medium with 10% fetal bovine serum was added to the lower chamber. After 24-48 h of incubation, the cells remaining inside the upper chamber were removed with a wet cotton swab, and the inserts were fixed with methanol for 10 min and then stained with 0.25% crystal violet. The invaded cells were counted in five randomly selected microscopic views. Cell invasion was measured using Transwell chambers coated with Matrigel (Corning, NY, USA) for a cell migration assay.

### **Cell adhesion assay**

A cell adhesion assay was performed on fibronectin-coated 96-well plates as reported previously<sup>[4]</sup>. In brief, a 96-well plate was first coated with human fibronectin (Prospec, Ness Ziona, Israel), and  $1 \times 10^4$  cells were seeded in the plate separately and incubated at 37°C for different times to determine the ability of the cells to adhere to fibronectin. Then, a total of 100  $\mu$ l of RPMI 1640 medium containing 10  $\mu$ l of CCK-8 reagent was added to each well, and the plate was incubated for 2 h. Finally, the absorbance at 450 nm was measured using a microplate reader to assess cell adhesion capacity.

### **Immunohistochemistry (IHC)**

ESCC tissue microarrays (Superbiotek, Shanghai, China) were first deparaffinized in a series of gradient ethanol baths, rehydrated, and immersed in methanol containing 0.3% hydrogen peroxide for 10 min to block endogenous peroxidase RT.

Subsequently, the microarrays were heated for 30 min in a pH 6.0 antigen retrieval solution to induce antigen retrieval and then incubated overnight with an anti-PUR $\alpha$



antibody (Abcam, Cat# ab79936) at 4°C. Staining was performed using a Prolink-2 Plus HRP rabbit polymer detection kit (Golden Bridge, Bothell, WA, USA) according to the manufacturer's instructions. Images were captured using Aperio ScanScope CS software (Aperio Technologies, Vista, CA, USA).

The results were evaluated based on the intensity and extent of staining by two senior pathologists independently (double blinded) as described previously [5]. Briefly, the PUR $\alpha$  staining area was scored as follows: 0, <5% of the epithelial cells stained in the respective lesions; 1, 5–25% of the epithelial cells stained; 2, 26–50% of the epithelial cells stained; 3, 51–75% of the epithelial cells stained; and 4,  $\geq$ 75% of the epithelial cells stained. The intensity was graded as follows: 0, negative; 1+, weak (yellow); 2+, moderate (light brown); and 3+, strong (dark brown). A final score between 0 and 12 was achieved by multiplication of the staining area and intensity scores. A staining index was used in which  $\leq$ 4 was considered low expression and  $>$ 4 was considered high expression. This study was approved from the Institutional Review Board of the Ethics Committee of National Cancer Center/Cancer Hospital, Chinese Academy of Medical Sciences and Peking Union Medical College (No. NCC1783) and performed in accordance with the guidelines of the Declaration of Helsinki.

### **Dual-luciferase reporter assay**

First, the 3'UTR of *IGFBP3* mRNA bound to PUR $\alpha$  was inserted into the psiCHECK<sup>TM</sup>-2 vector (Promega, Madison, WI, USA) using the XhoI and NotI (New England Biolabs) restriction endonuclease to construct the P2 reporter. Moreover, specific sites bound to PUR $\alpha$  were also mutated to generate mutation reporter P2-M1, P2-M2 and P2-M3 separately. Cells were plated into 24-well plates at a density of  $5 \times 10^4$  cells per well, and the reporters and siRNAs targeting *PURA* were transfected into each well, respectively. After 48 h of transfection, luciferase activity was measured using a Dual-Luciferase Reporter Assay System (Promega) following the manufacturer's protocol. The Renilla luciferase data were normalized to the firefly luciferase data. All experiments were performed in triplicate, and the results are

presented as the mean  $\pm$  SEM.

## **Xenografts**

For the *in vivo* tumorigenesis assay, a total of 24 five-week-old female BALB/c nude mice were purchased from Beijing Huafukang Bioscience (Beijing, China), and the mice were allocated to different experimental groups based on randomization. A total of  $1 \times 10^6$  negative control (NC), knockout (KO), KO+negative control lentivirus (LV) and KO+ PUR $\alpha$  lentivirus (LV-PUR $\alpha$ ) cells were suspended in 100  $\mu$ l of PBS separately and subcutaneously implanted into the back flanks of nude mice (each group,  $n = 6$ ). The tumor volume was calculated according to  $0.5 \times \text{length} \times \text{width}^2$  every three days after injection. Seventeen days after injection, all mice were euthanized, and the xenograft tumors were excised and weighed. All experimental procedures were approved by the Institutional Animal Care and Use Committee (IACUC) of the Cancer Hospital of the Chinese Academy of Medical Sciences.

## **References**

1. Rädle B, Rutkowski AJ, Ruzsics Z, Friedel CC, Koszinowski UH, Dölken L. Metabolic labeling of newly transcribed RNA for high resolution gene expression profiling of RNA synthesis, processing and decay in cell culture. *J Vis Exp*. 2013 Aug 8;(78):50195. doi: 10.3791/50195.
2. Faye MD, Graber TE, Holcik M. Assessment of selective mRNA translation in mammalian cells by polysome profiling. *J Vis Exp*. 2014 Oct 28;(92):e52295. doi: 10.3791/52295.
3. Gao J, Tian L, Sun Y, Li W, Zhao L, Sun Y, Jing Z, Zhou L, Liu F, Zhao X. PUR $\alpha$  mediates epithelial-mesenchymal transition to promote esophageal squamous cell carcinoma progression by regulating Snail2. *Cancer Lett*. 2021 Feb 1;498:98-110. doi: 10.1016/j.canlet.2020.10.030.
4. Han G, Wu Z, Zhao N, Zhou L, Liu F, Niu F, Xu Y, Zhao X. Overexpression of stathmin plays a pivotal role in the metastasis of esophageal squamous cell carcinoma. *Oncotarget*. 2017 Jun 27;8(37):61742-61760. doi: 10.18632/oncotarget.18687.
5. Hao XP, Pretlow TG, Rao JS, Pretlow TP. Beta-catenin expression is altered in human colonic aberrant crypt foci. *Cancer Res*. 2001 Nov 15;61(22):8085-8.

## Supplementary Figures

### Figure S1

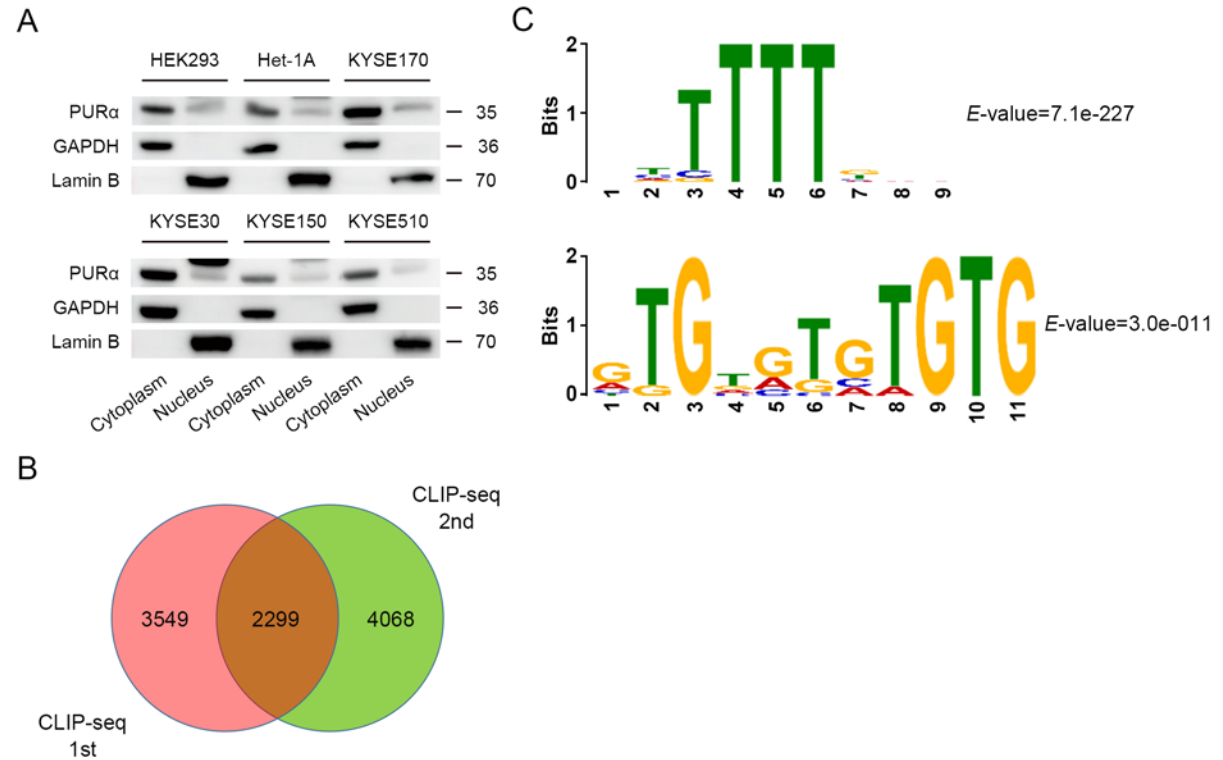

**Figure S1 PURα preferentially binds UG-/U-rich motifs.** **A** Protein fractionation analysis was performed to assess the distribution of endogenous PURα in HEK293, Het1A, KYSE170, KSYE30, KYSE150 and KYSE510 cells, respectively. **B** Venn diagram of the specific peaks bound to PURα in both PURα CLIP-seq datasets. **C** Top two motifs of the PURα binding sequences based on the PIPE-CLIP analysis of the crosslinking-induced mutations.

**Figure S2**

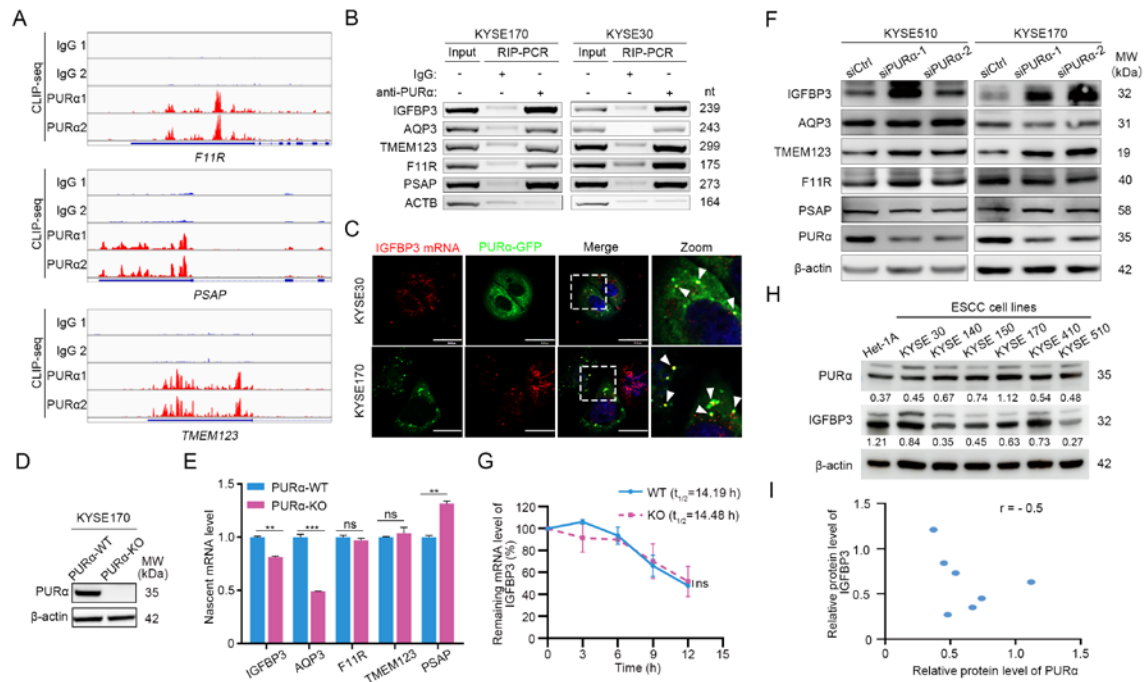

**Figure S2 PURα inhibits IGFBP3 protein expression by binding to its 3'UTR.**

**A** Genome browser views of specific peaks bound to PURα from CLIP-seq were visualized with IGV software. The y axis indicates the reads per million (RPM) value for the highest peak within the genome browser field for each CLIP-seq run.

Annotated RefSeq gene structures are shown in blue, with thin horizontal lines indicating introns and thicker blocks indicating exons. **B** A RIP assay followed by qPCR was performed to determine the interaction between PURα and mRNA of candidate genes in KYSE30 and KYSE170 cells separately. The results are representative of at least three independent experiments. ACTB, a negative control; nt: nucleotide.

**C** The interaction between PURα and the IGFBP3 mRNA 3'UTR was visualized using an RNA FISH assay in KYSE30 and KYSE170 cells separately. Scale bars: 30 μm.

**D** The efficiency of PURα knockout in KYSE170 cells was verified by western blot analysis. β-actin, a loading control.

**E** The nascent mRNA expression levels of candidate genes were assessed by detecting newly transcribed RNAs labeled with 4sU in wild-type and PURα-deficient KYSE170 cells separately.

**F** Western blot analysis of IGFBP3, AQP3, TMEM123, F11R, PSAP, PURα, and β-actin in KYSE510 and KYSE170 cells treated with siCtrl, siPURα-1, or siPURα-2.

**G** Line graph showing the remaining mRNA level of IGFBP3 (%) over time (h) in WT (t<sub>1/2</sub> = 14.19 h) and KO (t<sub>1/2</sub> = 14.48 h) cells. **H** Western blot analysis of PURα, IGFBP3, and β-actin in various ESCC cell lines. **I** Scatter plot showing the relative protein level of IGFBP3 vs relative protein level of PURα (r = -0.5).

Representative data are presented as the mean  $\pm$  SEM from three independent experiments. **F** The protein expression level of candidate genes were assessed by western blotting when the expression of PUR $\alpha$  was transiently knocked down by siRNA (Si-1 and Si-2) in KYSE170 and KYSE510 cell lines. siCtrl, scrambled siRNA controls. **G** The effect of PUR $\alpha$  on the mRNA stability of IGFBP3 was detected in PUR $\alpha$ -wild type (WT) and PUR $\alpha$ -deficient (KO) KYSE170 . The cells were treated with actinomycin D (ActD) for 0, 3, 6, 9 and 12 hours, and the mRNA level of IGFBP3 was determined by qPCR and normalized to the ACTB mRNA level. **H** The protein levels of PUR $\alpha$  and IGFBP3 in ESCC cell lines were examined by western blotting, respectively. The ratio under each lane indicates that PUR $\alpha$  and IGFBP3 expression was normalized to  $\beta$ -actin expression. **I** The Spearman correlation coefficient was computed based on the relative protein level of PUR $\alpha$  and IGFBP3 in ESCC cell lines.

**Figure S3**

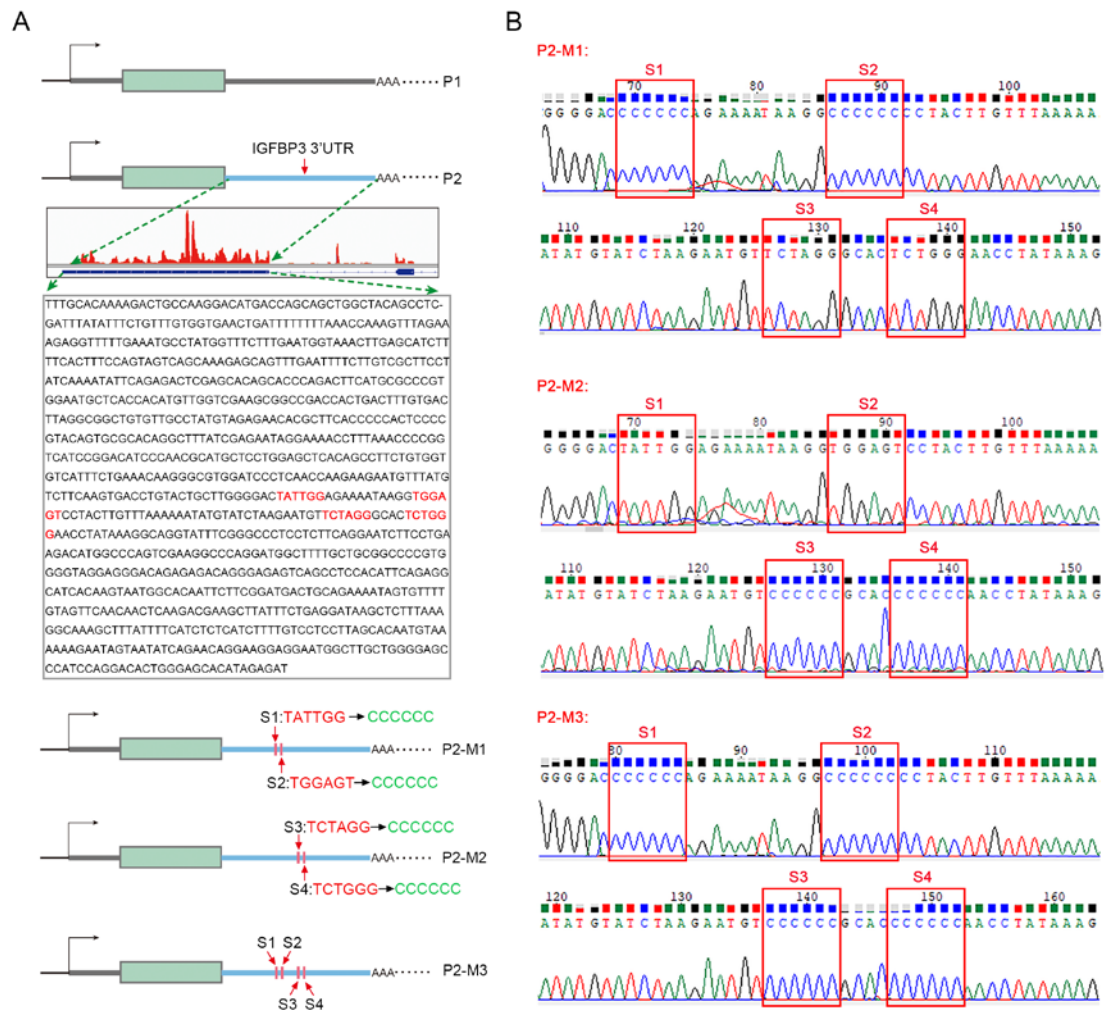

**Figure S3** The sequence of IGFBP3 3'UTR and mutation site was showed in psiCHECK<sup>TM</sup>-2 luciferase reporter. **A** Schematic diagram of the psiCHECK<sup>TM</sup>-2 luciferase reporter constructs containing the vector sequence (P1) or 3'UTR of IGFBP3 mRNA (P2). The green arrows indicate the sequence of the IGFBP3 mRNA 3'UTR that was chosen and cloned according to CLIP-seq (bottom panel). The red arrows indicate mutation site bound to PUR $\alpha$  in IGFBP3 mRNA 3'UTR. **B** The sequence of mutation site in psiCHECK<sup>TM</sup>-2 luciferase reporter was showed separately.

**Figure S4**

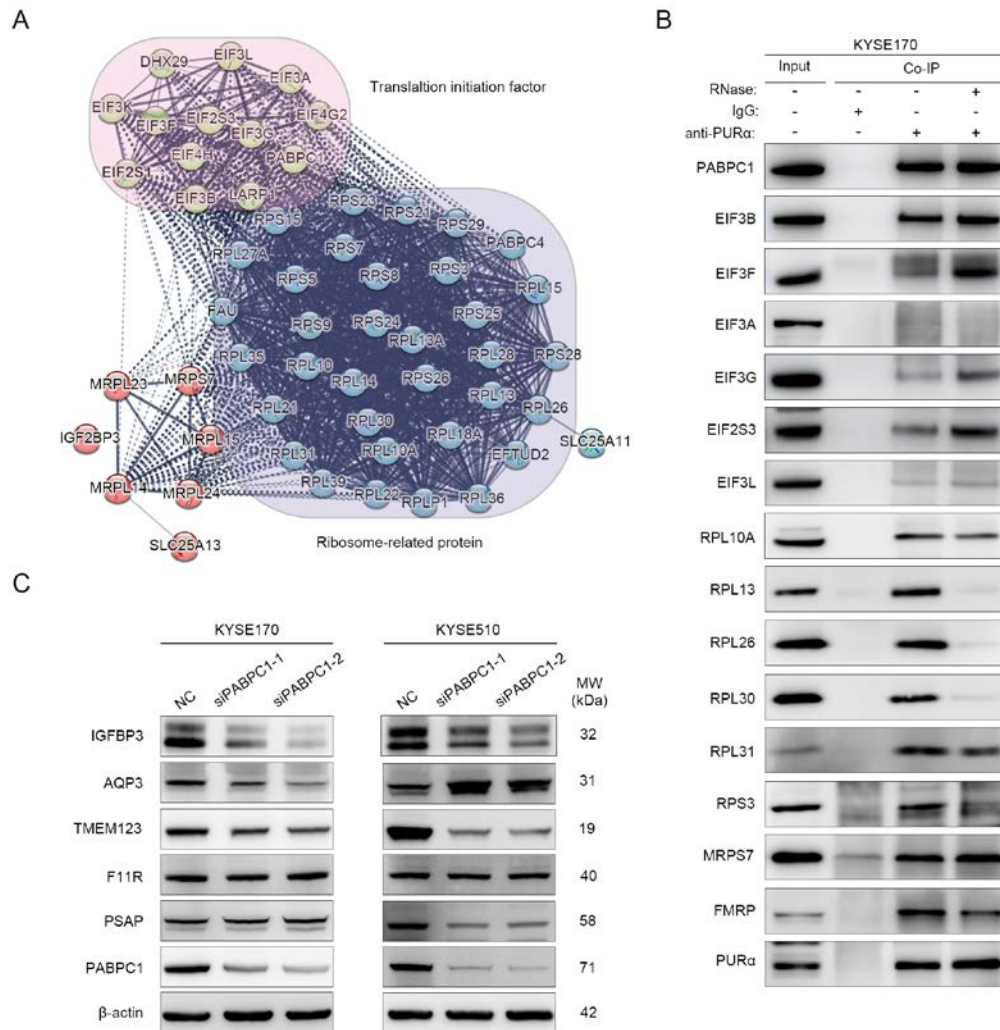

**Figure S4 PUR $\alpha$ -interacting proteins are implicated in mRNA translation. A**

An interaction network of mRNA translation-associated proteins interacted with PUR $\alpha$  was constructed and clustered with the Search Tool for the Retrieval of Interacting Genes/Proteins (STRING). **B** The interactions between PUR $\alpha$  and some representative proteins associated with mRNA translation were verified by coimmunoprecipitation in KYSE170. **C** The protein level of candidate genes were assessed via western blotting after knockdown of PABPC1 by siRNA in KYSE170 and KYSE510, respectively.

**Figure S5**

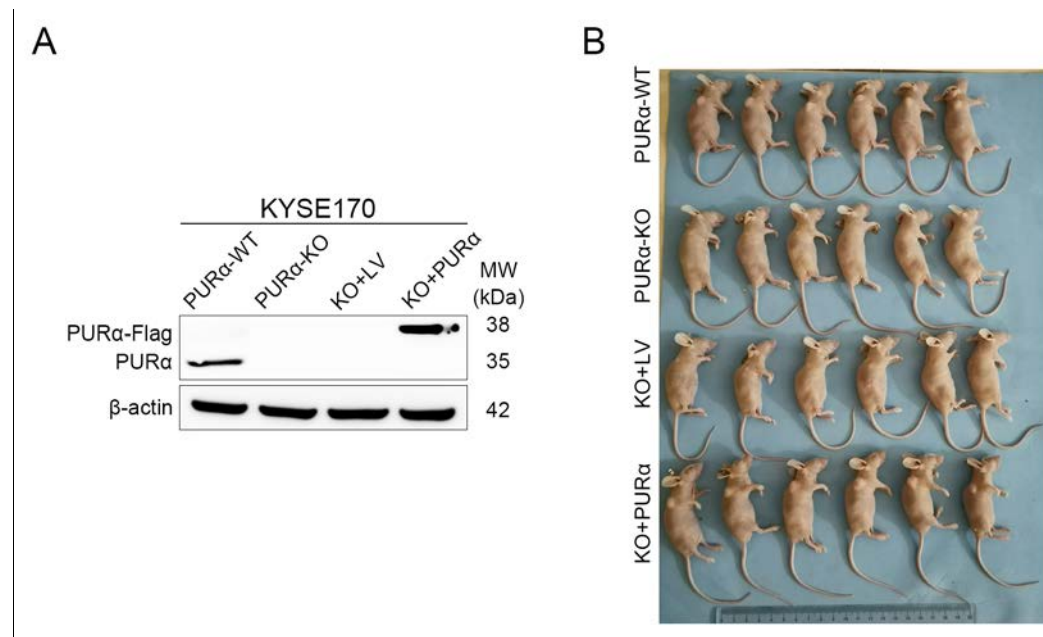

**Figure S5 Knockout of PUR $\alpha$  markedly inhibits ESCC progression *in vivo*.** PUR $\alpha$ -deficient KYSE170 cells were stably transfected with a lentiviral vector containing PUR $\alpha$  (LV-PUR $\alpha$ ) or a negative control lentiviral vector (LV). **A.** The protein levels of PUR $\alpha$  were assessed in wild-type (WT), PUR $\alpha$ -deficient (KO), KO-LV and KO-LV PUR $\alpha$  cells by western blotting, respectively. **B** WT, KO, KO+LV and KO+LV-PUR $\alpha$  cells were injected subcutaneously into nude mice ( $n = 6$ ) respectively. The mice were euthanized on 17 days after injection, and tumor formation in the mice is shown.



## Supplementary Tables

**Table S1 Correlations between PUR $\alpha$  expression and clinicopathological features in ESCC patients**

|                       | PUR $\alpha$ expression levels |                       | <i>p</i> |
|-----------------------|--------------------------------|-----------------------|----------|
|                       | High ( <i>n</i> = 296)         | Low ( <i>n</i> = 230) |          |
| Sex                   |                                |                       | 0.9636   |
| Male/female           | 213/83                         | 170/59                |          |
| Age                   |                                |                       | 0.7990   |
| <65/ $\geq$ 65 years  | 157/137                        | 124/106               |          |
| Differentiation       |                                |                       | 0.4446   |
| Good/Moderate/Poor    | 63/39/13                       | 51/38/10              |          |
| Depth of the tumors   |                                |                       | 0.1845   |
| T1+T2/T3+T4           | 205/85                         | 175/43                |          |
| Lymph node metastasis |                                |                       | 0.1011   |
| Negative/N1-N3        | 193/102                        | 107/119               |          |

**Table S2 Description of high-quality reads in CLIP-seq**

| <b>Sample</b>     | <b>Raw reads</b> | <b>Clean reads</b> | <b>Total mapped reads</b> | <b>Uniquely mapped reads</b> | <b>Uniquely mapped reads without duplication</b> |
|-------------------|------------------|--------------------|---------------------------|------------------------------|--------------------------------------------------|
| IgG_1st           | 14549964         | 2957460            | 1786695                   | 460155                       | 213623                                           |
| IgG_2nd           | 28898262         | 4610051            | 2994447                   | 578640                       | 250351                                           |
| PUR $\alpha$ _1st | 38557102         | 17000812           | 13986960                  | 5667437                      | 2783683                                          |
| PUR $\alpha$ _2nd | 34409870         | 15231429           | 12721579                  | 4652791                      | 2280046                                          |

The raw reads value includes the total reads yielded by high-throughput sequencing; the clean reads value refers to the high-quality reads after removal of self-connected adapters and low-quality bases and reads; the total mapped reads refers to the clean reads that accurately mapped to the human reference genome (hg38); the uniquely mapped reads are the clean reads that were uniquely mapped to one genomic location; and the uniquely mapped reads without duplication are the uniquely mapped reads minus the reads that were duplicated as a result of PCR.

**Table S3 Description of uniquely mapped reads to the reference genome in CLIP-seq**

| Sample            | 5'UTR            | 3'UTR              | CDS               | Nc_exon          | Introns             | Intergenic         | Antisense         |
|-------------------|------------------|--------------------|-------------------|------------------|---------------------|--------------------|-------------------|
| IgG_1st           | 3245<br>(1.52%)  | 27858<br>(13.04%)  | 49483<br>(23.16%) | 10543<br>(4.94%) | 71868<br>(33.64%)   | 22851<br>(10.7%)   | 27775<br>(13.0%)  |
| IgG_2nd           | 4643<br>(1.85%)  | 33371<br>(13.33%)  | 59947<br>(23.95%) | 13268<br>(5.3%)  | 78525<br>(31.37%)   | 24182<br>(9.66%)   | 36415<br>(14.55%) |
| PUR $\alpha$ _1st | 16495<br>(0.59%) | 261436<br>(9.39%)  | 198603<br>(7.13%) | 66543<br>(2.39%) | 1753081<br>(62.98%) | 292566<br>(10.51%) | 194959<br>(7%)    |
| PUR $\alpha$ _2nd | 16075<br>(0.71%) | 262379<br>(11.51%) | 190451<br>(8.35%) | 66758<br>(2.93%) | 1310632<br>(57.48%) | 236549<br>(10.37%) | 197202<br>(8.65%) |

The distribution of uniquely mapped reads without duplication on the reference genome was mainly divided into seven regions, including the 5'UTR, 3'UTR, CDS, nc\_exon, introns, intergenic regions and antisense strand.

**Table S6 Related resource information.**

| Antibodies                               | Source                           | Catalog number and identifier |
|------------------------------------------|----------------------------------|-------------------------------|
| PURA for WB, HIC & IF                    | Abcam, Waltham, MA               | ab79936, RRID: AB_2253242     |
| PURA for IP                              | Abcam                            | ab125200, RRID: AB_10973560   |
| IGFBP3                                   | Abcam                            | ab193910                      |
| AQP3                                     | Abcam                            | ab125219, RRID: AB_11000698   |
| PABPC1                                   | Abcam                            | ab21060, RRID: AB_777008      |
| PABPC1                                   | Proteintech, Rosemont, IL        | 66809-1-Ig, RRID:AB_2882152   |
| TMEM123                                  | Abclonal, Wuhan, China           | A17612, RRID: AB_2770635      |
| F11R                                     | Abclonal                         | A1241, RRID: AB_2759253       |
| PSAP                                     | Abclonal                         | A1819, RRID: AB_2763856       |
| RPL10A                                   | ABclonal                         | A5925, RRID: AB_2766664       |
| RPL13                                    | ABclonal                         | A6723, RRID: AB_2767307       |
| RPL31                                    | ABclonal                         | A17527, RRID: AB_2772081      |
| RPL30                                    | ABclonal                         | A13690, RRID: AB_2760550      |
| RPS3                                     | ABclonal                         | A4872, RRID: AB_2863369       |
| RPL26                                    | ABclonal                         | A16680, RRID: AB_2772076      |
| MRPS7                                    | ABclonal                         | A17150, RRID: AB_2770441      |
| EIF3A                                    | ABclonal                         | A0573, RRID: AB_2757272       |
| EIF3B                                    | ABclonal                         | A10259, RRID: AB_2757786      |
| EIF3F                                    | ABclonal                         | A7023, RRID: AB_2767579       |
| EIF3G                                    | ABclonal                         | A4240, RRID: AB_2765578       |
| EIF3L                                    | ABclonal                         | A9972, RRID: AB_2769294       |
| EIF2S3                                   | ABclonal                         | A6581, RRID: AB_2767174       |
| FMRP                                     | ABclonal                         | A6092, RRID: AB_2766744       |
| EIF3B                                    | Santa Cruz Biotech., CA          | sc-137214, RRID:AB_2277705    |
| β-Actin                                  | Sigma-Aldrich, St. Louis, MO     | A5316, RRID: AB_476743        |
| Flag                                     | MBL, Sakae Naka-ku Nagoya, Japan | M185-3L, RRID:AB_11123930     |
| HA                                       | CST, Danvers, MA                 | 3724s, RRID:AB_1549585        |
| HRP-conjugated mouse secondary antibody  | CST                              | 58802, RRID:AB_2799549        |
| HRP-conjugated rabbit secondary antibody | CST                              | 93702, RRID:AB_2800208        |

WB, western blot analysis; IHC, immunohistochemistry; IF, immunofluorescence staining; IP, immunoprecipitation; MBL, Medical & Biological Laboratories; CST, Cell Signaling Technology; RRID, Research Resource Identifier

(<https://scicrunch.org/resources>)

## Primer sequences and oligonucleotides

|                                                                          |
|--------------------------------------------------------------------------|
| IGFBP3 qPCR primer, Forward: CGCGCCAGGAAATGCTAGTG                        |
| IGFBP3 qPCR primer, Reverse: TTTGTAGCGCTGGCTGTCTT                        |
| AQP3 qPCR primer, Forward: ACCTACCCCTCTGGACACTT                          |
| AQP3 qPCR primer, Reverse: GGACGGGGTTGTTGTAGGG                           |
| TMEM123 qPCR primer, Forward: TCTGGGCTTCCACACAACCTC                      |
| TMEM123 qPCR primer, Reverse: AGGTTTCATGGTGGTGACCG                       |
| F11R qPCR primer, Forward: GTGCCTACTCGGGCTTTTCT                          |
| F11R qPCR primer, Reverse: AAGGTCACCCGGTCTCATA                           |
| PSAP qPCR primer, Forward: TGATGCACATGCAACCCAAG                          |
| PSAP qPCR primer, Reverse: GACTTTGCTGGGACCTCGTG                          |
| ACTB qPCR primer, Forward: CATGTACGTTGCTATCCAGGC                         |
| ACTB qPCR primer, Reverse: CTCCTTAATGTCACGCACGAT                         |
| IGFBP3 RIP-PCR primer, Forward: GCTGGCTACAGCCTCGATT                      |
| IGFBP3 RIP-PCR primer, Reverse: CATGTGGTGAGCATTCCACG                     |
| AQP3 RIP-PCR primer, Forward: TGGACCTTGCCCAAATAGCA                       |
| AQP3 RIP-PCR primer, Reverse: GTCTCTGGGCTCCCCAATA                        |
| TMEM123 RIP-PCR primer, Forward: AAGACAGAATGCCATCTGGGC                   |
| TMEM123 RIP-PCR primer, Reverse: GATCCCTAACAGGGCTAAGCA                   |
| F11R RIP-PCR primer, Forward: AATCTGCACTCAACTGCCCA                       |
| F11R RIP-PCR primer, Reverse: AGATGGAAGGACCCCAGTGT                       |
| PSAP RIP-PCR primer, Forward: CTTGTTCTGAGCCCTGACAT                       |
| PSAP RIP-PCR primer, Reverse: TGAACCAGGGACAGAGAACC                       |
| ACTB RIP-PCR primer, Forward: CTCACCATGGATGATGATATCGC                    |
| ACTB RIP-PCR primer, Reverse: TAGGAATCCTTCTGACCCATGC                     |
| siRNA negative control sense (5'-3'): UUCUCCGAAGGUGUCACGUTT              |
| siRNA negative control antisense (5'-3'): ACGUGACACGUUCGGAGAATT          |
| PUR $\alpha$ silencing siRNA -1 sense (5'-3'): GCGAGAACCGCAAGUACUATT     |
| PUR $\alpha$ silencing siRNA -1 antisense (5'-3'): UAGUACUUGCGGUUCUCGCTT |
| PUR $\alpha$ silencing siRNA -2 sense (5'-3'): CCACCUAUCGCAACUCCAUTT     |
| PUR $\alpha$ silencing siRNA -2 antisense (5'-3'): AUGGAGUUGCGAUAGGUGGTT |
| PABPC1 silencing siRNA -1 sense (5'-3'): GCUCCUAAAUGAUCGCAAATT           |
| PABPC1 silencing siRNA -1 antisense (5'-3'): UUUGCGAUCAUUUAGGAGCTT       |
| PABPC1 silencing siRNA -1 sense (5'-3'): GACCACCAUUUAGUACUAUTT           |
| PABPC1 silencing siRNA -1 antisense (5'-3'): AUAGUACUAAAUGGUGGUCTT       |
| IGFBP3 silencing siRNA -1 sense (5'-3'): GCCAGGAAAUGCUAGUGAGTT           |
| IGFBP3 silencing siRNA -1 antisense (5'-3'): CUCACUAGCAUUUCCUGGCTT       |
| IGFBP3 silencing siRNA -2 sense (5'-3'): UCAAGAAAGGGCAUGCUAATT           |
| IGFBP3 silencing siRNA -2 antisense (5'-3'): UUAGCAUGCCCUUUCUUGATT       |

## Primer sequences and oligonucleotides

|                                                                      |
|----------------------------------------------------------------------|
| Stellaris RNA FISH probe, human IGFBP3 3'UTR_1: ATTAACCTTGCGGCAGGC   |
| Stellaris RNA FISH probe, human IGFBP3 3'UTR_2: AGGCATATTTGAGCTCCA   |
| Stellaris RNA FISH probe, human IGFBP3 3'UTR_3: TGGCAGTCTTTTGTGCAA   |
| Stellaris RNA FISH probe, human IGFBP3 3'UTR_4: CTCTTTGCTGACTACTGG   |
| Stellaris RNA FISH probe, human IGFBP3 3'UTR_5: TGAAGTCTGGGTGCTGTG   |
| Stellaris RNA FISH probe, human IGFBP3 3'UTR_6: GTGAGCATTCACGGGCG    |
| Stellaris RNA FISH probe, human IGFBP3 3'UTR_7: CCGCTTCGACCAACATGT   |
| Stellaris RNA FISH probe, human IGFBP3 3'UTR_8: GTCACAAAGTCAGTGGTC   |
| Stellaris RNA FISH probe, human IGFBP3 3'UTR_9: CATAGGCAACACAGCCGC   |
| Stellaris RNA FISH probe, human IGFBP3 3'UTR_10: CGATAAAGCCTGTGCGCA  |
| Stellaris RNA FISH probe, human IGFBP3 3'UTR_11: GACCGGGGTTTAAAGTT   |
| Stellaris RNA FISH probe, human IGFBP3 3'UTR_12: AGCATGCGTTGGGATGTC  |
| Stellaris RNA FISH probe, human IGFBP3 3'UTR_13: GAAGGCTGTGAGCTCCAG  |
| Stellaris RNA FISH probe, human IGFBP3 3'UTR_14: TCTTGGTTGAGGGATCCA  |
| Stellaris RNA FISH probe, human IGFBP3 3'UTR_15: ATAGTCCCCAAGCAGTAC  |
| Stellaris RNA FISH probe, human IGFBP3 3'UTR_16: CTCCACCTTATTTTCTCC  |
| Stellaris RNA FISH probe, human IGFBP3 3'UTR_17: CCTTTATAGGTTCCAG    |
| Stellaris RNA FISH probe, human IGFBP3 3'UTR_18: ACTGGGCCATGTCTTCAG  |
| Stellaris RNA FISH probe, human IGFBP3 3'UTR_19: CCTCTGAATGTGGAGGCT  |
| Stellaris RNA FISH probe, human IGFBP3 3'UTR_20: TTGTGCCATTACTTGTGA  |
| Stellaris RNA FISH probe, human IGFBP3 3'UTR_21: TTTTCTGCAGTCATCCGA  |
| Stellaris RNA FISH probe, human IGFBP3 3'UTR_22: GCTTCGTCTTGAGTTGTT  |
| Stellaris RNA FISH probe, human IGFBP3 3'UTR_23: CTCCTTCCTGTTCTGATA  |
| Stellaris RNA FISH probe, human IGFBP3 3'UTR_24: AGTGTCCCTGGATGGGCTC |
| Stellaris RNA FISH probe, human IGFBP3 3'UTR_25: GGGGCTATGTTGTATACA  |
| Stellaris RNA FISH probe, human IGFBP3 3'UTR_26: ATGGCCACAGTTGTATCA  |
| Stellaris RNA FISH probe, human IGFBP3 3'UTR_27: GTGAGCTCCTTTCCTCAG  |
| Stellaris RNA FISH probe, human IGFBP3 3'UTR_28: AGAGCAGCCCAGTCTCTG  |
| Stellaris RNA FISH probe, human IGFBP3 3'UTR_29: CTTCTTGGGTTTGGCCTC  |
| Stellaris RNA FISH probe, human IGFBP3 3'UTR_30: TGAGCCTGACTTTGCCAG  |
| Stellaris RNA FISH probe, human IGFBP3 3'UTR_31: CAGCAGGGCAGAGTCTCC  |
| Stellaris RNA FISH probe, human IGFBP3 3'UTR_32: GTGTCCACACCGAGGTCT  |
| Stellaris RNA FISH probe, human IGFBP3 3'UTR_33: GGAGAGCTCTATGCAGCG  |
| Stellaris RNA FISH probe, human IGFBP3 3'UTR_34: GAGACCCCTCTGTTTCA   |
| Stellaris RNA FISH probe, human IGFBP3 3'UTR_35: TAGGTAGGCAGAATGTCT  |
