# Supplementary material for: Forming cytoplasmic stress granules PURα suppresses mRNA translation initiation of IGFBP3 to promote esophageal squamous cell carcinoma progression
Source: PubMed Central journal article supplement (PMC9481463; doi:10.1038/s41388-022-02426-3), 2022-08-09
Supplement: 41388_2022_2426_MOESM2_ESM.pdf [file 41388_2022_2426_MOESM2_ESM.pdf]

Supplementary Table S4\_Specific Peaks bound to PURa in CLIP-seq\_PURa vs IgG

## Specific peaks bound to PURa in CLIP-seq

| Chr   | Start     | End       | Tags | Strand | Length | Gene      | Description                                                   | Genotype |
|-------|-----------|-----------|------|--------|--------|-----------|---------------------------------------------------------------|----------|
| chr7  | 45912779  | 45913715  | 337  | -      | 1056   | IGFBP3    | insulin like growth factor binding protein 3                  | mRNA     |
| chr7  | 45913716  | 45913834  | 337  | -      | 1056   | IGFBP3    | insulin like growth factor binding protein 3                  | mRNA     |
| chr9  | 33441189  | 33441994  | 259  | -      | 1023   | AQP3      | aquaporin 3 (Gill blood group)                                | mRNA     |
| chr8  | 128041242 | 128041957 | 258  | +      | 739    | PVT1      |                                                               | lncRNA   |
| chr11 | 102396665 | 102396968 | 222  | -      | 824    | TMEM123   | transmembrane protein 123                                     | mRNA     |
| chr11 | 102396970 | 102397353 | 222  | -      | 824    | TMEM123   | transmembrane protein 123                                     | mRNA     |
| chr11 | 102397354 | 102397485 | 222  | -      | 824    | TMEM123   | transmembrane protein 123                                     | mRNA     |
| chr8  | 128040611 | 128040908 | 220  | +      | 609    | PVT1      |                                                               | lncRNA   |
| chr8  | 128040918 | 128041217 | 220  | +      | 609    | PVT1      |                                                               | lncRNA   |
| chr9  | 129339500 | 129339747 | 219  | +      | 1037   | LINC01503 |                                                               | lncRNA   |
| chr9  | 129339749 | 129340059 | 219  | +      | 1037   | LINC01503 |                                                               | lncRNA   |
| chr9  | 129340060 | 129340299 | 219  | +      | 1037   | LINC01503 |                                                               | lncRNA   |
| chr9  | 129340336 | 129340527 | 219  | +      | 1037   | LINC01503 |                                                               | lncRNA   |
| chr1  | 109100164 | 109100622 | 214  | +      | 502    | SCARNA2   |                                                               | scaRNA   |
| chr17 | 41518466  | 41518867  | 189  | -      | 674    | KRT15     | keratin 15                                                    | mRNA     |
| chr1  | 209431509 | 209432191 | 165  | +      | 685    | MIR205HG  |                                                               | lncRNA   |
| chr8  | 128042245 | 128042560 | 157  | +      | 764    | PVT1      |                                                               | lncRNA   |
| chr8  | 128039608 | 128039974 | 154  | +      | 644    | PVT1      |                                                               | lncRNA   |
| chr1  | 160997625 | 160997963 | 135  | -      | 340    | F11R      | F11 receptor                                                  | mRNA     |
| chr1  | 43596959  | 43597330  | 133  | +      | 588    | PTPRF     | protein tyrosine phosphatase receptor type F                  | mRNA     |
| chr10 | 71816296  | 71816566  | 133  | -      | 628    | PSAP      | prosaposin                                                    | mRNA     |
| chr10 | 71816567  | 71816923  | 133  | -      | 628    | PSAP      | prosaposin                                                    | mRNA     |
| chr3  | 195746895 | 195747207 | 130  | -      | 580    | MUC4      | mucin 4, cell surface associated                              | mRNA     |
| chr3  | 195747235 | 195747380 | 130  | -      | 580    | MUC4      | mucin 4, cell surface associated                              | mRNA     |
| chr6  | 7583435   | 7583518   | 128  | +      | 878    | DSP       | desmoplakin                                                   | mRNA     |
| chr11 | 70421914  | 70422157  | 123  | +      | 744    | CTTN      | cortactin                                                     | mRNA     |
| chr11 | 70422158  | 70422290  | 123  | +      | 744    | CTTN      | cortactin                                                     | mRNA     |
| chr11 | 70422291  | 70422577  | 123  | +      | 744    | CTTN      | cortactin                                                     | mRNA     |
| chr20 | 37518009  | 37518190  | 120  | -      | 719    | BLCAP     | BLCAP apoptosis inducing factor                               | mRNA     |
| chr20 | 37518328  | 37518512  | 120  | -      | 719    | BLCAP     | BLCAP apoptosis inducing factor                               | mRNA     |
| chr1  | 28508829  | 28509037  | 117  | +      | 520    | SNHG3     |                                                               | lncRNA   |
| chr1  | 28509075  | 28509216  | 117  | +      | 520    | SNHG3     |                                                               | lncRNA   |
| chr1  | 28509231  | 28509324  | 117  | +      | 520    | SNHG3     |                                                               | lncRNA   |
| chr6  | 122444259 | 122444570 | 116  | -      | 344    | SERINC1   | serine incorporator 1                                         | mRNA     |
| chr8  | 128033139 | 128033446 | 113  | +      | 673    | PVT1      |                                                               | lncRNA   |
| chr9  | 129340537 | 129340785 | 107  | +      | 479    | LINC01503 |                                                               | lncRNA   |
| chr9  | 129340810 | 129341015 | 107  | +      | 479    | LINC01503 |                                                               | lncRNA   |
| chr1  | 205713772 | 205713943 | 106  | -      | 679    | NUCKS1    | nuclear casein kinase and cyclin-dependent kinase substrate 1 | mRNA     |
| chr1  | 205714103 | 205714217 | 106  | -      | 679    | NUCKS1    | nuclear casein kinase and cyclin-dependent kinase substrate 1 | mRNA     |
| chr1  | 205714344 | 205714436 | 106  | -      | 679    | NUCKS1    | nuclear casein kinase and cyclin-dependent kinase substrate 1 | mRNA     |
| chr8  | 11844384  | 11844428  | 103  | -      | 676    | CTSB      | cathepsin B                                                   | mRNA     |
| chr8  | 11844429  | 11844637  | 103  | -      | 676    | CTSB      | cathepsin B                                                   | mRNA     |
| chr8  | 11844710  | 11844978  | 103  | -      | 676    | CTSB      | cathepsin B                                                   | mRNA     |
| chr8  | 11844991  | 11845059  | 103  | -      | 676    | CTSB      | cathepsin B                                                   | mRNA     |
| chr5  | 882730    | 883050    | 100  | -      | 854    | BRD9      | bromodomain containing 9                                      | mRNA     |
| chr8  | 119245265 | 119245390 | 98   | +      | 388    | MAL2      | mal, T cell differentiation protein 2                         | mRNA     |
| chr8  | 119245393 | 119245652 | 98   | +      | 388    | MAL2      | mal, T cell differentiation protein 2                         | mRNA     |
| chr17 | 59839906  | 59840184  | 97   | +      | 490    | VMP1      | vacuole membrane protein 1                                    | mRNA     |
| chr12 | 6346817   | 6347300   | 97   | -      | 509    | SCNN1A    | sodium channel epithelial 1 alpha subunit                     | mRNA     |
| chr11 | 70420336  | 70420615  | 96   | +      | 446    | CTTN      | cortactin                                                     | mRNA     |
| chr1  | 161072130 | 161072569 | 93   | -      | 451    | NECTIN4   | nectin cell adhesion molecule 4                               | mRNA     |
| chr3  | 196049807 | 196050186 | 93   | -      | 659    | TFRC      | transferrin receptor                                          | mRNA     |
| chr3  | 196050332 | 196050452 | 93   | -      | 659    | TFRC      | transferrin receptor                                          | mRNA     |
| chr1  | 160996232 | 160996523 | 92   | -      | 357    | F11R      | F11 receptor                                                  | mRNA     |
| chr1  | 54851750  | 54852055  | 92   | -      | 470    | DHCR24    | 24-dehydrocholesterol reductase                               | mRNA     |
| chr8  | 97851472  | 97851593  | 91   | +      | 436    | LAPTM4B   | lysosomal protein transmembrane 4 beta                        | mRNA     |
| chr8  | 97851599  | 97851831  | 91   | +      | 436    | LAPTM4B   | lysosomal protein transmembrane 4 beta                        | mRNA     |
| chr11 | 70408269  | 70408361  | 89   | +      | 449    | CTTN      | cortactin                                                     | mRNA     |
| chr12 | 49762872  | 49763049  | 89   | +      | 412    | TMBIM6    | transmembrane BAX inhibitor motif containing 6                | mRNA     |
| chr12 | 49763057  | 49763174  | 89   | +      | 412    | TMBIM6    | transmembrane BAX inhibitor motif containing 6                | mRNA     |
| chr16 | 68834529  | 68834670  | 89   | +      | 625    | CDH1      | cadherin 1                                                    | mRNA     |
| chr16 | 68834672  | 68834750  | 89   | +      | 625    | CDH1      | cadherin 1                                                    | mRNA     |

Supplementary Table S4\_Specific Peaks bound to PURa in CLIP-seq\_PURa vs IgG

|       |           |           |    |   |     |          |                                                                            |        |
|-------|-----------|-----------|----|---|-----|----------|----------------------------------------------------------------------------|--------|
| chr16 | 68834764  | 68835011  | 89 | + | 625 | CDH1     | cadherin 1                                                                 | mRNA   |
| chr16 | 31187071  | 31187250  | 87 | + | 394 | FUS      | FUS RNA binding protein                                                    | mRNA   |
| chr16 | 31187252  | 31187415  | 87 | + | 394 | FUS      | FUS RNA binding protein                                                    | mRNA   |
| chr1  | 160998147 | 160998350 | 85 | - | 484 | F11R     | F11 receptor                                                               | mRNA   |
| chr1  | 160998354 | 160998630 | 85 | - | 484 | F11R     | F11 receptor                                                               | mRNA   |
| chr12 | 12916594  | 12916793  | 83 | + | 384 | GPRC5A   | G protein-coupled receptor, class C, group 5, member A                     | mRNA   |
| chr12 | 12916794  | 12916939  | 83 | + | 384 | GPRC5A   | G protein-coupled receptor, class C, group 5, member A                     | mRNA   |
| chr8  | 118356966 | 118357075 | 82 | - | 514 | SAMD12   | sterile alpha motif domain containing 12                                   | mRNA   |
| chr1  | 156742129 | 156742524 | 82 | - | 422 | HDGF     | heparin binding growth factor                                              | mRNA   |
| chr11 | 62516343  | 62516494  | 81 | - | 491 | AHNAK    | AHNAK nucleoprotein                                                        | mRNA   |
| chr8  | 128007443 | 128007585 | 81 | + | 462 | PVT1     |                                                                            | lncRNA |
| chr8  | 119244794 | 119245048 | 80 | + | 276 | MAL2     | mal, T cell differentiation protein 2                                      | mRNA   |
| chr6  | 44253488  | 44253843  | 80 | + | 396 | HSP90AB1 | heat shock protein 90 alpha family class B member 1                        | mRNA   |
| chr1  | 54850883  | 54851273  | 80 | - | 482 | DHCR24   | 24-dehydrocholesterol reductase                                            | mRNA   |
| chr11 | 102398424 | 102398619 | 78 | - | 196 | TMEM123  | transmembrane protein 123                                                  | mRNA   |
| chr17 | 41513764  | 41514125  | 78 | - | 398 | KRT15    | keratin 15                                                                 | mRNA   |
| chr14 | 102081399 | 102081821 | 78 | - | 435 | HSP90AA1 | heat shock protein 90 alpha family class A member 1                        | mRNA   |
| chr7  | 45912383  | 45912576  | 77 | - | 392 | IGFBP3   | insulin like growth factor binding protein 3                               | mRNA   |
| chr7  | 45912608  | 45912771  | 77 | - | 392 | IGFBP3   | insulin like growth factor binding protein 3                               | mRNA   |
| chr8  | 119243416 | 119243661 | 76 | + | 353 | MAL2     | mal, T cell differentiation protein 2                                      | mRNA   |
| chr2  | 85320914  | 85321223  | 75 | - | 310 | TGOLN2   | trans-golgi network protein 2                                              | mRNA   |
| chr3  | 41239653  | 41239736  | 72 | + | 289 | CTNNA1   | catenin beta 1                                                             | mRNA   |
| chr3  | 41239794  | 41239916  | 72 | + | 289 | CTNNA1   | catenin beta 1                                                             | mRNA   |
| chr16 | 87830024  | 87830195  | 72 | - | 351 | SLC7A5   | solute carrier family 7 member 5                                           | mRNA   |
| chr16 | 87830218  | 87830374  | 72 | - | 351 | SLC7A5   | solute carrier family 7 member 5                                           | mRNA   |
| chr8  | 118042615 | 118042857 | 71 | - | 513 | EXT1     | exostosin glycosyltransferase 1                                            | mRNA   |
| chr12 | 12913264  | 12913619  | 70 | + | 475 | GPRC5A   | G protein-coupled receptor, class C, group 5, member A                     | mRNA   |
| chr5  | 43290826  | 43291089  | 69 | - | 382 | HMGCS1   | 3-hydroxy-3-methylglutaryl-CoA synthase 1                                  | mRNA   |
| chr1  | 209787225 | 209787488 | 69 | - | 409 | IRF6     | interferon regulatory factor 6                                             | mRNA   |
| chr6  | 7579501   | 7579830   | 68 | + | 372 | DSP      | desmoplakin                                                                | mRNA   |
| chr15 | 98958600  | 98958979  | 67 | + | 406 | IGF1R    | insulin like growth factor 1 receptor                                      | mRNA   |
| chr1  | 153981820 | 153981938 | 67 | - | 406 | RAB13    | RAB13, member RAS oncogene family                                          | mRNA   |
| chr1  | 153981939 | 153982078 | 67 | - | 406 | RAB13    | RAB13, member RAS oncogene family                                          | mRNA   |
| chr1  | 173866609 | 173866713 | 66 | - | 188 | SNORD76  |                                                                            | snoRNA |
| chr5  | 151663074 | 151663177 | 66 | - | 440 | SPARC    | secreted protein acidic and cysteine rich                                  | mRNA   |
| chr5  | 151663180 | 151663352 | 66 | - | 440 | SPARC    | secreted protein acidic and cysteine rich                                  | mRNA   |
| chr5  | 151663377 | 151663419 | 66 | - | 440 | SPARC    | secreted protein acidic and cysteine rich                                  | mRNA   |
| chr17 | 59838854  | 59839031  | 64 | + | 320 | VMP1     | vacuole membrane protein 1                                                 | mRNA   |
| chr8  | 128034910 | 128035140 | 64 | + | 367 | PVT1     |                                                                            | lncRNA |
| chr19 | 46774908  | 46775179  | 64 | - | 273 | SLC1A5   | solute carrier family 1 member 5                                           | mRNA   |
| chr14 | 39180764  | 39180962  | 63 | + | 439 | PNN      | pinin, desmosome associated protein                                        | mRNA   |
| chr11 | 62516716  | 62516755  | 62 | - | 397 | AHNAK    | AHNAK nucleoprotein                                                        | mRNA   |
| chr11 | 62516767  | 62517112  | 62 | - | 397 | AHNAK    | AHNAK nucleoprotein                                                        | mRNA   |
| chr14 | 102050627 | 102050775 | 62 | + | 149 | DYNC1H1  | dynein cytoplasmic 1 heavy chain 1                                         | mRNA   |
| chr2  | 47386571  | 47386728  | 62 | + | 158 | EPCAM    | epithelial cell adhesion molecule                                          | mRNA   |
| chr12 | 12916963  | 12917236  | 62 | + | 274 | GPRC5A   | G protein-coupled receptor, class C, group 5, member A                     | mRNA   |
| chr17 | 1344791   | 1345028   | 62 | - | 297 | YWHAE    | tyrosine 3-monooxygenase/tryptophan 5-monooxygenase activation protein eps | mRNA   |
| chr17 | 41515487  | 41515692  | 61 | - | 349 | KRT15    | keratin 15                                                                 | mRNA   |
| chr19 | 40939166  | 40939238  | 61 | + | 388 | CYP2B7P  |                                                                            | pseudo |
| chr19 | 40939390  | 40939523  | 61 | + | 388 | CYP2B7P  |                                                                            | pseudo |
| chr6  | 109368075 | 109368308 | 61 | - | 250 | CD164    | CD164 molecule                                                             | mRNA   |
| chr11 | 62624831  | 62624903  | 60 | - | 290 | GANAB    | glucosidase II alpha subunit                                               | mRNA   |
| chr12 | 49764431  | 49764610  | 60 | + | 313 | TMBIM6   | transmembrane BAX inhibitor motif containing 6                             | mRNA   |
| chr12 | 49764618  | 49764721  | 60 | + | 313 | TMBIM6   | transmembrane BAX inhibitor motif containing 6                             | mRNA   |
| chr11 | 57817005  | 57817345  | 60 | + | 511 | CTNND1   | catenin delta 1                                                            | mRNA   |
| chr11 | 71484619  | 71484925  | 59 | + | 307 | NADSYN1  | NAD synthetase 1                                                           | mRNA   |
| chr6  | 106971336 | 106971533 | 59 | - | 202 | CD24     | CD24 molecule                                                              | mRNA   |
| chr1  | 116404440 | 116404749 | 59 | + | 360 | ATP1A1   | ATPase Na <sup>+</sup> /K <sup>+</sup> transporting subunit alpha 1        | mRNA   |
| chr2  | 85544544  | 85544725  | 59 | + | 402 | MAT2A    | methionine adenosyltransferase 2A                                          | mRNA   |
| chr5  | 179705678 | 179705852 | 58 | + | 175 | CANX     | calnexin                                                                   | mRNA   |
| chr3  | 105574715 | 105574836 | 58 | + | 338 | ALCAM    | activated leukocyte cell adhesion molecule                                 | mRNA   |
| chr1  | 205715664 | 205715958 | 58 | - | 394 | NUCKS1   | nuclear casein kinase and cyclin-dependent kinase substrate 1              | mRNA   |
| chr8  | 11844018  | 11844167  | 57 | - | 518 | CTSB     | cathepsin B                                                                | mRNA   |

Supplementary Table S4\_Specific Peaks bound to PURa in CLIP-seq\_PURa vs IgG

|       |           |           |    |   |     |          |                                                                             |        |
|-------|-----------|-----------|----|---|-----|----------|-----------------------------------------------------------------------------|--------|
| chr8  | 128054653 | 128054801 | 57 | + | 366 | PVT1     |                                                                             | lncRNA |
| chr12 | 6510293   | 6510570   | 57 | + | 350 | SCARNA10 |                                                                             | scaRNA |
| chr6  | 106970159 | 106970308 | 57 | - | 231 | CD24     | CD24 molecule                                                               | mRNA   |
| chr10 | 100362423 | 100362627 | 57 | + | 244 | SCD      | stearoyl-CoA desaturase (delta-9-desaturase)                                | mRNA   |
| chr2  | 10783908  | 10784118  | 57 | - | 270 | PDIA6    | protein disulfide isomerase family A member 6                               | mRNA   |
| chr3  | 194405089 | 194405214 | 57 | - | 362 | ATP13A3  | ATPase 13A3                                                                 | mRNA   |
| chr8  | 117989580 | 117989853 | 56 | - | 297 | EXT1     | exostosin glycosyltransferase 1                                             | mRNA   |
| chr10 | 72275138  | 72275466  | 56 | + | 329 | DDIT4    | DNA-damage-inducible transcript 4                                           | mRNA   |
| chr11 | 102231071 | 102231232 | 56 | + | 424 | YAP1     | Yes associated protein 1                                                    | mRNA   |
| chr9  | 93565865  | 93566073  | 55 | + | 209 | FAM120A  | family with sequence similarity 120A                                        | mRNA   |
| chr12 | 48936217  | 48936265  | 55 | - | 426 | ARF3     | ADP ribosylation factor 3                                                   | mRNA   |
| chr12 | 48936294  | 48936423  | 55 | - | 426 | ARF3     | ADP ribosylation factor 3                                                   | mRNA   |
| chr14 | 55672928  | 55673012  | 54 | + | 85  | KTN1     | kinectin 1                                                                  | mRNA   |
| chr8  | 128006793 | 128006955 | 54 | + | 328 | PVT1     |                                                                             | lncRNA |
| chr11 | 93721718  | 93721866  | 54 | + | 149 | SCARNA9  |                                                                             | scaRNA |
| chr17 | 59840952  | 59841166  | 54 | + | 345 | VMP1     | vacuole membrane protein 1                                                  | mRNA   |
| chr3  | 194403688 | 194403866 | 53 | - | 191 | ATP13A3  | ATPase 13A3                                                                 | mRNA   |
| chr14 | 21210938  | 21211157  | 53 | - | 220 | HNRNPC   | heterogeneous nuclear ribonucleoprotein C                                   | mRNA   |
| chr17 | 58004979  | 58005020  | 53 | - | 313 | SRSF1    | serine and arginine rich splicing factor 1                                  | mRNA   |
| chr17 | 58005038  | 58005220  | 53 | - | 313 | SRSF1    | serine and arginine rich splicing factor 1                                  | mRNA   |
| chr20 | 44499259  | 44499317  | 52 | - | 322 | SERINC3  | serine incorporator 3                                                       | mRNA   |
| chr20 | 44498996  | 44499119  | 52 | - | 322 | SERINC3  | serine incorporator 3                                                       | mRNA   |
| chr9  | 134339817 | 134340099 | 52 | + | 580 | RXRA     | retinoid X receptor, alpha                                                  | mRNA   |
| chr16 | 19119112  | 19119375  | 52 | + | 264 | ITPR1L2  | inositol 1,4,5-trisphosphate receptor interacting protein-like 2            | mRNA   |
| chr12 | 12914239  | 12914465  | 52 | + | 290 | GPRC5A   | G protein-coupled receptor, class C, group 5, member A                      | mRNA   |
| chr8  | 100918956 | 100919246 | 52 | - | 340 | YWHAZ    | tyrosine 3-monooxygenase/tryptophan 5-monooxygenase activation protein zeta | mRNA   |
| chr2  | 231454951 | 231455004 | 52 | - | 362 | NCL      | nucleolin                                                                   | mRNA   |
| chr16 | 2771149   | 2771306   | 52 | + | 371 | SRRM2    | serine/arginine repetitive matrix 2                                         | mRNA   |
| chr7  | 74196253  | 74196339  | 52 | + | 614 | EIF4H    | eukaryotic translation initiation factor 4H                                 | mRNA   |
| chr20 | 45326114  | 45326297  | 51 | - | 193 | SDC4     | syndecan 4                                                                  | mRNA   |
| chr9  | 129739261 | 129739554 | 51 | - | 294 | PTGES    | prostaglandin E synthase                                                    | mRNA   |
| chr5  | 179728590 | 179728928 | 51 | + | 345 | CANX     | calnexin                                                                    | mRNA   |
| chr6  | 7584730   | 7584928   | 50 | + | 370 | DSP      | desmoplakin                                                                 | mRNA   |
| chr1  | 183144273 | 183144443 | 50 | + | 171 | LAMC1    | laminin, gamma 1 (formerly LAMB2)                                           | mRNA   |
| chr8  | 123014521 | 123014755 | 50 | - | 286 | DERL1    | derlin 1                                                                    | mRNA   |
| chr19 | 35123440  | 35123619  | 50 | + | 324 | FXYD3    | FXYD domain containing ion transport regulator 3                            | mRNA   |
| chr14 | 75132584  | 75132655  | 50 | - | 325 | TMED10   | transmembrane p24 trafficking protein 10                                    | mRNA   |
| chr14 | 75132658  | 75132831  | 50 | - | 325 | TMED10   | transmembrane p24 trafficking protein 10                                    | mRNA   |
| chr19 | 38291927  | 38292059  | 50 | + | 333 | SPINT2   | serine peptidase inhibitor, Kunitz type 2                                   | mRNA   |
| chr19 | 38292062  | 38292156  | 50 | + | 333 | SPINT2   | serine peptidase inhibitor, Kunitz type 2                                   | mRNA   |
| chr20 | 45479013  | 45479225  | 49 | + | 261 | WFDC2    | WAP four-disulfide core domain 2                                            | mRNA   |
| chr20 | 36094149  | 36094211  | 49 | + | 383 | EPB41L1  | erythrocyte membrane protein band 4.1 like 1                                | mRNA   |
| chr20 | 36094302  | 36094449  | 49 | + | 383 | EPB41L1  | erythrocyte membrane protein band 4.1 like 1                                | mRNA   |
| chr20 | 36048033  | 36048187  | 49 | - | 227 | NORAD    |                                                                             | lncRNA |
| chr2  | 233772975 | 233773165 | 49 | + | 191 | UGT1A8   | UDP glucuronosyltransferase 1 family, polypeptide A8                        | mRNA   |
| chr12 | 56597506  | 56597601  | 49 | - | 213 | BAZ2A    | bromodomain adjacent to zinc finger domain 2A                               | mRNA   |
| chr12 | 56597603  | 56597718  | 49 | - | 213 | BAZ2A    | bromodomain adjacent to zinc finger domain 2A                               | mRNA   |
| chr1  | 119913318 | 119913491 | 49 | - | 238 | NOTCH2   | notch receptor 2                                                            | mRNA   |
| chr1  | 205714570 | 205714734 | 49 | - | 272 | NUCKS1   | nuclear casein kinase and cyclin-dependent kinase substrate 1               | mRNA   |
| chr17 | 41515884  | 41516010  | 48 | - | 137 | KRT15    | keratin 15                                                                  | mRNA   |
| chr10 | 32911966  | 32912124  | 48 | - | 159 | ITGB1    | integrin subunit beta 1                                                     | mRNA   |
| chr8  | 118110051 | 118110141 | 48 | - | 282 | EXT1     | exostosin glycosyltransferase 1                                             | mRNA   |
| chr17 | 47682459  | 47682550  | 48 | + | 148 | KPNB1    | karyopherin subunit beta 1                                                  | mRNA   |
| chr14 | 75134354  | 75134607  | 48 | - | 254 | TMED10   | transmembrane p24 trafficking protein 10                                    | mRNA   |
| chr2  | 10791794  | 10791925  | 47 | - | 132 | PDIA6    | protein disulfide isomerase family A member 6                               | mRNA   |
| chr20 | 44498755  | 44498824  | 47 | - | 235 | SERINC3  | serine incorporator 3                                                       | mRNA   |
| chr20 | 44498825  | 44498884  | 47 | - | 235 | SERINC3  | serine incorporator 3                                                       | mRNA   |
| chr20 | 44498886  | 44498989  | 47 | - | 235 | SERINC3  | serine incorporator 3                                                       | mRNA   |
| chr19 | 47720642  | 47720770  | 47 | + | 400 | EHD2     | EH domain containing 2                                                      | mRNA   |
| chr14 | 102081031 | 102081398 | 47 | - | 492 | HSP90AA1 | heat shock protein 90 alpha family class A member 1                         | mRNA   |
| chr11 | 10801467  | 10801607  | 46 | - | 150 | SNORD97  |                                                                             | snRNA  |
| chrX  | 20136064  | 20136135  | 46 | - | 218 | SCARNA9L |                                                                             | scaRNA |
| chrX  | 20136155  | 20136267  | 46 | - | 218 | SCARNA9L |                                                                             | scaRNA |
| chr13 | 48261307  | 48261482  | 46 | + | 403 | ITM2B    | integral membrane protein 2B                                                | mRNA   |

Supplementary Table S4\_Specific Peaks bound to PURa in CLIP-seq\_PURa vs IgG

|       |           |           |    |   |     |          |                                                                   |               |
|-------|-----------|-----------|----|---|-----|----------|-------------------------------------------------------------------|---------------|
| chr13 | 48261528  | 48261637  | 46 | + | 403 | ITM2B    | integral membrane protein 2B                                      | mRNA          |
| chr1  | 154206946 | 154207114 | 46 | - | 325 | C1orf43  | chromosome 1 open reading frame 43                                | mRNA          |
| chr7  | 129832390 | 129832634 | 46 | - | 364 | UBE2H    | ubiquitin conjugating enzyme E2 H                                 | mRNA          |
| chr11 | 18407320  | 18407826  | 46 | + | 509 | LDHA     | lactate dehydrogenase A                                           | mRNA          |
| chr8  | 11838558  | 11838778  | 45 | + | 392 | FDFT1    | farnesyl-diphosphate farnesyltransferase 1                        | mRNA          |
| chr4  | 186706562 | 186706835 | 45 | - | 274 | FAT1     | FAT atypical cadherin 1                                           | mRNA          |
| chr13 | 45337197  | 45337320  | 45 | - | 124 | TPT1     | tumor protein, translationally-controlled 1                       | mRNA          |
| chr8  | 117979481 | 117979527 | 45 | - | 242 | EXT1     | exostosin glycosyltransferase 1                                   | mRNA          |
| chr20 | 49634157  | 49634347  | 45 | - | 191 | B4GALT5  | UDP-Gal:betaGlcNAc beta 1,4- galactosyltransferase, polypeptide 5 | mRNA          |
| chr6  | 30899889  | 30900129  | 45 | + | 241 | DDR1     | discoidin domain receptor tyrosine kinase 1                       | mRNA          |
| chr19 | 3981338   | 3981452   | 44 | - | 115 | EEF2     | eukaryotic translation elongation factor 2                        | mRNA          |
| chr11 | 102401538 | 102401692 | 44 | - | 155 | TMEM123  | transmembrane protein 123                                         | mRNA          |
| chr11 | 34076250  | 34076474  | 44 | + | 240 | CAPRIN1  | cell cycle associated protein 1                                   | mRNA          |
| chr11 | 62517725  | 62517927  | 44 | - | 203 | AHNAK    | AHNAK nucleoprotein                                               | mRNA          |
| chr1  | 12582607  | 12582844  | 44 | - | 415 | DHRS3    | dehydrogenase/reductase 3                                         | mRNA          |
| chr8  | 127999773 | 127999906 | 44 | + | 157 | PVT1     |                                                                   | lncRNA        |
| chr3  | 108047127 | 108047292 | 44 | - | 176 | CD47     | CD47 molecule                                                     | mRNA          |
| chr8  | 116846005 | 116846069 | 44 | - | 183 | RAD21    | RAD21 cohesin complex component                                   | mRNA          |
| chr8  | 116846078 | 116846144 | 44 | - | 183 | RAD21    | RAD21 cohesin complex component                                   | mRNA          |
| chr16 | 18791926  | 18792143  | 44 | - | 239 | ARL6IP1  | ADP ribosylation factor like GTPase 6 interacting protein 1       | mRNA          |
| chr7  | 106091017 | 106091220 | 44 | - | 252 | SYPL1    | synaptophysin like 1                                              | mRNA          |
| chr1  | 42177638  | 42177842  | 44 | - | 253 | FOXJ3    | forkhead box J3                                                   | mRNA          |
| chr1  | 167789312 | 167789404 | 44 | + | 267 | MPZL1    | myelin protein zero like 1                                        | mRNA          |
| chr1  | 167789461 | 167789556 | 44 | + | 267 | MPZL1    | myelin protein zero like 1                                        | mRNA          |
| chr10 | 87754440  | 87754687  | 44 | - | 273 | ATAD1    | ATPase family AAA domain containing 1                             | mRNA          |
| chr11 | 1752754   | 1753035   | 44 | - | 282 | CTSD     | cathepsin D                                                       | mRNA          |
| chr11 | 71434470  | 71434714  | 44 | - | 403 | DHCR7    | 7-dehydrocholesterol reductase                                    | mRNA          |
| chr11 | 71434817  | 71434872  | 44 | - | 403 | DHCR7    | 7-dehydrocholesterol reductase                                    | mRNA          |
| chr2  | 241352202 | 241352330 | 44 | + | 420 | SEPTIN2  | septin 2                                                          | mRNA          |
| chr1  | 183142618 | 183142763 | 43 | + | 312 | LAMC1    | laminin, gamma 1 (formerly LAMB2)                                 | mRNA          |
| chr14 | 92042318  | 92042384  | 43 | + | 241 |          |                                                                   | no annotation |
| chr14 | 92042452  | 92042513  | 43 | + | 241 |          |                                                                   | no annotation |
| chr1  | 20775523  | 20775667  | 43 | - | 145 | HP1BP3   |                                                                   | mRNA          |
| chr11 | 62528909  | 62529093  | 43 | - | 189 | AHNAK    | AHNAK nucleoprotein                                               | mRNA          |
| chr8  | 118078847 | 118078956 | 43 | - | 201 | EXT1     | exostosin glycosyltransferase 1                                   | mRNA          |
| chr17 | 16439730  | 16439866  | 43 | + | 387 | SNHG29   |                                                                   | lncRNA        |
| chr19 | 49497718  | 49497802  | 43 | + | 92  | SNORD35B |                                                                   | snoRNA        |
| chr1  | 173867653 | 173867744 | 43 | - | 287 | SNORD74  |                                                                   | snoRNA        |
| chr17 | 16439498  | 16439727  | 43 | + | 387 | SNORD49B |                                                                   | snoRNA        |
| chr12 | 6967333   | 6967396   | 43 | - | 306 | SCARNA12 |                                                                   | scaRNA        |
| chr12 | 6967446   | 6967606   | 43 | - | 306 | SCARNA12 |                                                                   | scaRNA        |
| chr19 | 54461820  | 54461992  | 43 | + | 201 | LENG8    | leukocyte receptor cluster member 8                               | mRNA          |
| chr3  | 160501478 | 160501708 | 43 | - | 232 | KPNA4    | karyopherin subunit alpha 4                                       | mRNA          |
| chr1  | 207794623 | 207794753 | 43 | + | 263 | CD46     | CD46 molecule                                                     | mRNA          |
| chr3  | 49534632  | 49534730  | 43 | + | 319 | DAG1     | dystroglycan 1                                                    | mRNA          |
| chr3  | 48467886  | 48467994  | 43 | - | 332 | SHISA5   | shisa family member 5                                             | mRNA          |
| chr3  | 48468079  | 48468217  | 43 | - | 332 | SHISA5   | shisa family member 5                                             | mRNA          |
| chr10 | 71820239  | 71820335  | 42 | - | 97  | PSAP     | prosaposin                                                        | mRNA          |
| chr1  | 23693806  | 23693913  | 42 | + | 108 | RPL11    | ribosomal protein L11                                             | mRNA          |
| chr6  | 7580672   | 7580921   | 42 | + | 250 | DSP      | desmoplakin                                                       | mRNA          |
| chr4  | 186707201 | 186707366 | 42 | - | 305 | FAT1     | FAT atypical cadherin 1                                           | mRNA          |
| chr4  | 186618197 | 186618463 | 42 | - | 368 | FAT1     | FAT atypical cadherin 1                                           | mRNA          |
| chr21 | 39342497  | 39342570  | 42 | - | 217 | HMGN1    | high mobility group nucleosome binding domain 1                   | mRNA          |
| chr21 | 39342574  | 39342692  | 42 | - | 217 | HMGN1    | high mobility group nucleosome binding domain 1                   | mRNA          |
| chr11 | 1746050   | 1746144   | 42 | - | 331 | IFITM10  | interferon induced transmembrane protein 10                       | mRNA          |
| chr11 | 62532524  | 62532729  | 42 | - | 341 | AHNAK    | AHNAK nucleoprotein                                               | mRNA          |
| chr1  | 173864363 | 173864446 | 42 | - | 84  | SNORD47  |                                                                   | snoRNA        |
| chr15 | 66503244  | 66503314  | 42 | - | 88  | SNORD18A |                                                                   | snoRNA        |
| chr2  | 231460363 | 231460438 | 42 | - | 100 | SNORD82  |                                                                   | snoRNA        |
| chr20 | 2654211   | 2654286   | 42 | + | 114 | SNORD110 |                                                                   | snoRNA        |
| chr19 | 40941766  | 40941818  | 42 | + | 273 | CYP2B7P  |                                                                   | pseudo        |
| chr1  | 203740129 | 203740222 | 42 | + | 266 | ATP2B4   | ATPase plasma membrane Ca <sup>2+</sup> transporting 4            | mRNA          |
| chr1  | 203740227 | 203740328 | 42 | + | 266 | ATP2B4   | ATPase plasma membrane Ca <sup>2+</sup> transporting 4            | mRNA          |
| chr1  | 26864158  | 26864456  | 42 | + | 299 | SFN      | stratifin                                                         | mRNA          |

Supplementary Table S4\_Specific Peaks bound to PURa in CLIP-seq\_PURa vs IgG

|       |           |           |    |   |     |           |                                                                            |        |
|-------|-----------|-----------|----|---|-----|-----------|----------------------------------------------------------------------------|--------|
| chr1  | 214645916 | 214646132 | 41 | + | 283 | CENPF     | centromere protein F                                                       | mRNA   |
| chr11 | 70371325  | 70371521  | 41 | + | 197 | PPFIA1    | PTPRF interacting protein alpha 1                                          | mRNA   |
| chr11 | 62529507  | 62529650  | 41 | - | 244 | AHNAK     | AHNAK nucleoprotein                                                        | mRNA   |
| chr1  | 44778389  | 44778459  | 41 | + | 71  | SNORD38B  |                                                                            | snoRNA |
| chr1  | 75787847  | 75787971  | 41 | + | 142 | SNORD45A  |                                                                            | snoRNA |
| chr3  | 195568706 | 195568828 | 41 | - | 131 | APOD      | apolipoprotein D                                                           | mRNA   |
| chr1  | 207794861 | 207795029 | 41 | + | 173 | CD46      | CD46 molecule                                                              | mRNA   |
| chr17 | 1345298   | 1345499   | 41 | - | 202 | YWHAE     | tyrosine 3-monooxygenase/tryptophan 5-monooxygenase activation protein eps | mRNA   |
| chr2  | 85544933  | 85545018  | 41 | + | 205 | MAT2A     | methionine adenosyltransferase 2A                                          | mRNA   |
| chr17 | 40457259  | 40457449  | 41 | + | 210 | IGFBP4    | insulin-like growth factor binding protein 4                               | mRNA   |
| chr17 | 40457450  | 40457468  | 41 | + | 210 | IGFBP4    | insulin-like growth factor binding protein 4                               | mRNA   |
| chr1  | 205715018 | 205715096 | 41 | - | 210 | NUCKS1    | nuclear casein kinase and cyclin-dependent kinase substrate 1              | mRNA   |
| chr11 | 110230506 | 110230688 | 41 | - | 237 | RDX       | radixin, transcript variant 4                                              | mRNA   |
| chr20 | 3805709   | 3805936   | 41 | + | 271 | CDC25B    | cell division cycle 25B                                                    | mRNA   |
| chr20 | 51600691  | 51600740  | 41 | - | 284 | ATP9A     | ATPase phospholipid transporting 9A                                        | mRNA   |
| chr20 | 51600755  | 51600879  | 41 | - | 284 | ATP9A     | ATPase phospholipid transporting 9A                                        | mRNA   |
| chr15 | 98961229  | 98961402  | 41 | + | 420 | IGF1R     | insulin like growth factor 1 receptor                                      | mRNA   |
| chr9  | 130135427 | 130135605 | 41 | + | 454 | GPR107    | G protein-coupled receptor 107                                             | mRNA   |
| chr9  | 130135779 | 130135880 | 41 | + | 454 | GPR107    | G protein-coupled receptor 107                                             | mRNA   |
| chr8  | 11845060  | 11845214  | 40 | - | 163 | CTSB      | cathepsin B                                                                | mRNA   |
| chr14 | 55612303  | 55612389  | 40 | + | 271 | KTN1      | kinectin 1                                                                 | mRNA   |
| chr15 | 66502021  | 66502091  | 40 | - | 133 | SNORD18B  |                                                                            | snoRNA |
| chr1  | 171592262 | 171592362 | 40 | + | 228 | PRRC2C    | proline rich coiled-coil 2C                                                | mRNA   |
| chr21 | 25880955  | 25881059  | 40 | - | 230 | APP       | amyloid beta precursor protein                                             | mRNA   |
| chr21 | 25881060  | 25881160  | 40 | - | 230 | APP       | amyloid beta precursor protein                                             | mRNA   |
| chr17 | 35725561  | 35725665  | 40 | + | 247 | AP2B1     | adaptor related protein complex 2 subunit beta 1                           | mRNA   |
| chr2  | 20032707  | 20032756  | 40 | - | 350 | LAPTM4A   | lysosomal protein transmembrane 4 alpha                                    | mRNA   |
| chr2  | 20032760  | 20033024  | 40 | - | 350 | LAPTM4A   | lysosomal protein transmembrane 4 alpha                                    | mRNA   |
| chr17 | 78971428  | 78971488  | 39 | - | 327 | LGALS3BP  | galectin 3 binding protein                                                 | mRNA   |
| chr17 | 78971489  | 78971727  | 39 | - | 327 | LGALS3BP  | galectin 3 binding protein                                                 | mRNA   |
| chr8  | 116857379 | 116857473 | 39 | - | 114 | RAD21     | RAD21 cohesin complex component                                            | mRNA   |
| chr5  | 882176    | 882268    | 39 | - | 213 | BRD9      | bromodomain containing 9                                                   | mRNA   |
| chr1  | 44777841  | 44777910  | 39 | + | 72  | SNORD38A  |                                                                            | snoRNA |
| chr22 | 39315207  | 39315304  | 39 | - | 99  | SNORD83A  |                                                                            | snoRNA |
| chr1  | 173865622 | 173865820 | 39 | - | 199 | SNORD78   |                                                                            | snoRNA |
| chr11 | 62852906  | 62853016  | 39 | - | 203 | SNORD22   |                                                                            | snoRNA |
| chr5  | 151662611 | 151662795 | 39 | - | 185 | SPARC     | secreted protein acidic and cysteine rich                                  | mRNA   |
| chr10 | 96521193  | 96521321  | 39 | - | 195 | TM9SF3    | transmembrane 9 superfamily member 3                                       | mRNA   |
| chr4  | 105970432 | 105970560 | 39 | + | 200 | NPNT      | nephronectin                                                               | mRNA   |
| chr4  | 105970562 | 105970631 | 39 | + | 200 | NPNT      | nephronectin                                                               | mRNA   |
| chr22 | 36266405  | 36266606  | 39 | + | 204 | APOL1     | apolipoprotein L1                                                          | mRNA   |
| chr9  | 111933295 | 111933510 | 39 | + | 217 | UGCG      | UDP-glucose ceramide glucosyltransferase                                   | mRNA   |
| chr2  | 47160379  | 47160539  | 39 | - | 225 | CALM2     | calmodulin 2                                                               | mRNA   |
| chr9  | 128694822 | 128695139 | 39 | + | 318 | SET       | SET nuclear proto-oncogene                                                 | mRNA   |
| chr19 | 583064    | 583082    | 39 | + | 435 | BSG       | basigin (OK blood group)                                                   | mRNA   |
| chr3  | 194405993 | 194406094 | 38 | - | 324 | ATP13A3   | ATPase 13A3                                                                | mRNA   |
| chr19 | 48966561  | 48966878  | 38 | + | 318 | FTL       | ferritin light chain                                                       | mRNA   |
| chr5  | 179614797 | 179614959 | 38 | - | 163 | HNRNPH1   | heterogeneous nuclear ribonucleoprotein H1                                 | mRNA   |
| chr11 | 62853874  | 62853968  | 38 | - | 96  | SNORD29   |                                                                            | snoRNA |
| chr1  | 173865966 | 173866041 | 38 | - | 115 | SNORD44   |                                                                            | snoRNA |
| chr9  | 69715234  | 69715374  | 38 | - | 142 | PTAR1     | protein prenyltransferase alpha subunit repeat containing 1                | mRNA   |
| chr5  | 151504125 | 151504233 | 38 | - | 157 | FAT2      | FAT atypical cadherin 2                                                    | mRNA   |
| chr1  | 227919700 | 227919888 | 38 | - | 214 | WNT9A     | wingless-type MMTV integration site family, member 9A                      | mRNA   |
| chr5  | 159158106 | 159158176 | 38 | - | 251 | RNF145    | ring finger protein 145                                                    | mRNA   |
| chr5  | 159158195 | 159158356 | 38 | - | 251 | RNF145    | ring finger protein 145                                                    | mRNA   |
| chr14 | 55629956  | 55630097  | 37 | + | 142 | KTN1      | kinectin 1                                                                 | mRNA   |
| chr11 | 62570964  | 62571108  | 37 | - | 145 | EEF1G     | eukaryotic translation elongation factor 1 gamma                           | mRNA   |
| chr11 | 71437795  | 71437943  | 37 | - | 161 | DHCR7     | 7-dehydrocholesterol reductase                                             | mRNA   |
| chr7  | 45917212  | 45917374  | 37 | - | 163 | IGFBP3    | insulin like growth factor binding protein 3                               | mRNA   |
| chr20 | 44498607  | 44498748  | 37 | - | 142 | SERINC3   | serine incorporator 3                                                      | mRNA   |
| chr8  | 118012788 | 118012887 | 37 | - | 184 | EXT1      | exostosin glycosyltransferase 1                                            | mRNA   |
| chr17 | 72553774  | 72553971  | 37 | - | 275 | LINC00673 |                                                                            | lncRNA |
| chr9  | 133350846 | 133350912 | 37 | + | 67  | SNORD36C  |                                                                            | snoRNA |
| chr1  | 173864813 | 173864905 | 37 | - | 173 | SNORD80   |                                                                            | snoRNA |

Supplementary Table S4\_Specific Peaks bound to PURa in CLIP-seq\_PURa vs IgG

|       |           |           |    |   |     |          |                                                                            |        |
|-------|-----------|-----------|----|---|-----|----------|----------------------------------------------------------------------------|--------|
| chr19 | 40933812  | 40933968  | 37 | + | 317 | CYP2B7P  |                                                                            | pseudo |
| chr5  | 151663420 | 151663572 | 37 | - | 180 | SPARC    | secreted protein acidic and cysteine rich                                  | mRNA   |
| chr6  | 33203908  | 33204095  | 37 | + | 188 | SLC39A7  | solute carrier family 39 member 7                                          | mRNA   |
| chr17 | 38919803  | 38919943  | 37 | + | 222 | LASP1    | LIM and SH3 protein 1                                                      | mRNA   |
| chr15 | 72199028  | 72199099  | 37 | - | 252 | PKM      | pyruvate kinase M1/2                                                       | mRNA   |
| chr20 | 49634972  | 49635147  | 37 | - | 258 | B4GALT5  | UDP-Gal:betaGlcNAc beta 1,4- galactosyltransferase, polypeptide 5          | mRNA   |
| chr20 | 49635150  | 49635199  | 37 | - | 258 | B4GALT5  | UDP-Gal:betaGlcNAc beta 1,4- galactosyltransferase, polypeptide 5          | mRNA   |
| chr1  | 154584452 | 154584486 | 37 | - | 284 | ADAR     | adenosine deaminase RNA specific                                           | mRNA   |
| chr13 | 21147645  | 21147717  | 37 | + | 381 | SAP18    | Sin3A associated protein 18                                                | mRNA   |
| chr13 | 21147722  | 21147789  | 37 | + | 381 | SAP18    | Sin3A associated protein 18                                                | mRNA   |
| chr11 | 62880946  | 62881234  | 36 | + | 520 | SLC3A2   | solute carrier family 3 member 2                                           | mRNA   |
| chr8  | 117938884 | 117939033 | 36 | - | 156 | EXT1     | exostosin glycosyltransferase 1                                            | mRNA   |
| chr17 | 16439973  | 16440142  | 36 | + | 192 | SNORD49A |                                                                            | snoRNA |
| chr1  | 209785855 | 209785909 | 36 | - | 237 | IRF6     | interferon regulatory factor 6                                             | mRNA   |
| chr5  | 171410621 | 171410683 | 36 | + | 249 | NPM1     | nucleophosmin 1                                                            | mRNA   |
| chr5  | 171410761 | 171410869 | 36 | + | 249 | NPM1     | nucleophosmin 1                                                            | mRNA   |
| chr17 | 58089788  | 58089934  | 36 | + | 291 | DYNLL2   | dynein, light chain, LC8-type 2                                            | mRNA   |
| chr17 | 58089935  | 58089996  | 36 | + | 291 | DYNLL2   | dynein, light chain, LC8-type 2                                            | mRNA   |
| chr14 | 103136378 | 103136501 | 36 | + | 305 | TNFAIP2  | TNF alpha induced protein 2                                                | mRNA   |
| chr6  | 7558115   | 7558249   | 35 | + | 143 | DSP      | desmoplakin                                                                | mRNA   |
| chr5  | 181242215 | 181242345 | 35 | - | 238 | RACK1    | receptor for activated C kinase 1                                          | mRNA   |
| chr19 | 36215292  | 36215475  | 35 | + | 222 | ZNF146   | zinc finger protein 146                                                    | mRNA   |
| chr5  | 181243310 | 181243378 | 35 | - | 69  | SNORD95  |                                                                            | snoRNA |
| chr9  | 133349395 | 133349470 | 35 | + | 76  | SNORD24  |                                                                            | snoRNA |
| chr6  | 132817218 | 132817348 | 35 | + | 151 | SNORA33  |                                                                            | snoRNA |
| chr3  | 186786674 | 186786852 | 35 | + | 180 | SNORA81  |                                                                            | snoRNA |
| chr1  | 28508545  | 28508762  | 35 | + | 269 | SNORA73B |                                                                            | snoRNA |
| chr10 | 73917074  | 73917158  | 35 | + | 140 | PLAU     | plasminogen activator                                                      | mRNA   |
| chr6  | 30493572  | 30493689  | 35 | + | 180 | HLA-E    | major histocompatibility complex, class I, E                               | mRNA   |
| chr5  | 179614538 | 179614723 | 35 | - | 186 | HNRNPH1  | heterogeneous nuclear ribonucleoprotein H1                                 | mRNA   |
| chr16 | 18793070  | 18793124  | 35 | - | 196 | ARL6IP1  | ADP ribosylation factor like GTPase 6 interacting protein 1                | mRNA   |
| chr16 | 18793126  | 18793248  | 35 | - | 196 | ARL6IP1  | ADP ribosylation factor like GTPase 6 interacting protein 1                | mRNA   |
| chr19 | 38292205  | 38292366  | 35 | + | 253 | SPINT2   | serine peptidase inhibitor, Kunitz type 2                                  | mRNA   |
| chr19 | 38292371  | 38292414  | 35 | + | 253 | SPINT2   | serine peptidase inhibitor, Kunitz type 2                                  | mRNA   |
| chr19 | 42377801  | 42377980  | 35 | + | 263 | MEGF8    | multiple EGF like domains 8                                                | mRNA   |
| chr13 | 106559090 | 106559203 | 34 | - | 241 | ARGLU1   | arginine and glutamate rich 1                                              | mRNA   |
| chr11 | 62517929  | 62518198  | 34 | - | 270 | AHNAK    | AHNAK nucleoprotein                                                        | mRNA   |
| chr1  | 173866877 | 173866939 | 34 | - | 63  | SNORD75  |                                                                            | snoRNA |
| chr1  | 75789446  | 75789552  | 34 | + | 107 | SNORD45B |                                                                            | snoRNA |
| chr15 | 66501251  | 66501318  | 34 | - | 109 | SNORD18C |                                                                            | snoRNA |
| chr10 | 5458030   | 5458166   | 34 | + | 150 | NET1     | neuroepithelial cell transforming 1                                        | mRNA   |
| chr1  | 6186293   | 6186470   | 34 | - | 180 | RPL22    | ribosomal protein L22                                                      | mRNA   |
| chr11 | 130144427 | 130144584 | 34 | + | 184 | APLP2    | amyloid beta precursor like protein 2                                      | mRNA   |
| chr6  | 30626108  | 30626271  | 34 | + | 189 | MRPS18B  | mitochondrial ribosomal protein S18B                                       | mRNA   |
| chr18 | 3458116   | 3458275   | 34 | + | 203 | TGIF1    | TGFB induced factor homeobox 1                                             | mRNA   |
| chr1  | 209786167 | 209786325 | 34 | - | 211 | IRF6     | interferon regulatory factor 6                                             | mRNA   |
| chr22 | 41907087  | 41907280  | 34 | + | 218 | SREBF2   | sterol regulatory element binding transcription factor 2                   | mRNA   |
| chr15 | 98961403  | 98961440  | 34 | + | 223 | IGF1R    | insulin like growth factor 1 receptor                                      | mRNA   |
| chr11 | 71434873  | 71435133  | 34 | - | 261 | DHCR7    | 7-dehydrocholesterol reductase                                             | mRNA   |
| chr11 | 1753177   | 1753449   | 34 | - | 296 | CTSD     | cathepsin D                                                                | mRNA   |
| chrX  | 16844835  | 16845087  | 34 | - | 316 | RBBP7    | RB binding protein 7, chromatin remodeling factor                          | mRNA   |
| chr7  | 45916566  | 45916667  | 33 | - | 105 | IGFBP3   | insulin like growth factor binding protein 3                               | mRNA   |
| chr18 | 35689202  | 35689290  | 33 | + | 119 | GALNT1   | polypeptide N-acetylgalactosaminyltransferase 1                            | mRNA   |
| chr1  | 116398620 | 116398735 | 33 | + | 170 | ATP1A1   | ATPase Na+/K+ transporting subunit alpha 1                                 | mRNA   |
| chr1  | 116398749 | 116398789 | 33 | + | 170 | ATP1A1   | ATPase Na+/K+ transporting subunit alpha 1                                 | mRNA   |
| chr8  | 39077227  | 39077297  | 33 | + | 185 | ADAM9    | ADAM metallopeptidase domain 9                                             | mRNA   |
| chr8  | 39077304  | 39077411  | 33 | + | 185 | ADAM9    | ADAM metallopeptidase domain 9                                             | mRNA   |
| chr6  | 47005508  | 47005697  | 33 | - | 190 | ADGRF1   | adhesion G protein-coupled receptor F1                                     | mRNA   |
| chr19 | 3982506   | 3982573   | 33 | - | 68  | SNORD37  |                                                                            | snoRNA |
| chr6  | 132815307 | 132815389 | 33 | + | 92  | SNORD101 |                                                                            | snoRNA |
| chr22 | 39319050  | 39319113  | 33 | - | 113 | SNORD43  |                                                                            | snoRNA |
| chr1  | 75787070  | 75787225  | 33 | + | 156 | SNORD45C |                                                                            | snoRNA |
| chr9  | 129738333 | 129738429 | 33 | - | 97  | PTGES    | prostaglandin E synthase                                                   | mRNA   |
| chr8  | 100920401 | 100920539 | 33 | - | 139 | YWHAZ    | tyrosine 3-monooxygenase/tryptophan 5-monooxygenase activation protein zet | mRNA   |

Supplementary Table S4\_Specific Peaks bound to PURa in CLIP-seq\_PURa vs IgG

|       |           |           |    |   |     |          |                                                                    |        |
|-------|-----------|-----------|----|---|-----|----------|--------------------------------------------------------------------|--------|
| chr12 | 6237762   | 6237920   | 33 | + | 174 | CD9      | CD9 molecule                                                       | mRNA   |
| chr1  | 169131742 | 169131879 | 33 | + | 185 | ATP1B1   | ATPase Na <sup>+</sup> /K <sup>+</sup> transporting subunit beta 1 | mRNA   |
| chr16 | 87830558  | 87830574  | 33 | - | 187 | SLC7A5   | solute carrier family 7 member 5                                   | mRNA   |
| chr12 | 88198204  | 88198258  | 33 | + | 204 | TMTC3    | transmembrane O-mannosyltransferase targeting cadherins 3          | mRNA   |
| chr12 | 88198262  | 88198356  | 33 | + | 204 | TMTC3    | transmembrane O-mannosyltransferase targeting cadherins 3          | mRNA   |
| chr3  | 196829487 | 196829741 | 33 | + | 255 | PAK2     | p21 (RAC1) activated kinase 2                                      | mRNA   |
| chr2  | 230818841 | 230818915 | 33 | + | 258 | CAB39    | calcium binding protein 39                                         | mRNA   |
| chr2  | 230818921 | 230819098 | 33 | + | 258 | CAB39    | calcium binding protein 39                                         | mRNA   |
| chr9  | 112221641 | 112221716 | 33 | - | 281 | PTBP3    | polypyrimidine tract binding protein 3                             | mRNA   |
| chr9  | 112221719 | 112221869 | 33 | - | 281 | PTBP3    | polypyrimidine tract binding protein 3                             | mRNA   |
| chr12 | 125029781 | 125029937 | 33 | + | 282 | BRI3BP   | BRI3 binding protein                                               | mRNA   |
| chr17 | 38921477  | 38921744  | 33 | + | 312 | LASP1    | LIM and SH3 protein 1                                              | mRNA   |
| chr1  | 45511036  | 45511167  | 33 | - | 409 | PRDX1    | peroxiredoxin 1                                                    | mRNA   |
| chr1  | 45511173  | 45511414  | 33 | - | 409 | PRDX1    | peroxiredoxin 1                                                    | mRNA   |
| chr22 | 38485482  | 38485522  | 33 | - | 258 | DDX17    | DEAD-box helicase 17                                               | mRNA   |
| chr11 | 35229128  | 35229407  | 32 | + | 314 | CD44     | CD44 molecule                                                      | mRNA   |
| chr14 | 55671784  | 55671877  | 32 | + | 117 | KTN1     | kinectin 1                                                         | mRNA   |
| chr8  | 39026676  | 39026810  | 32 | + | 152 | ADAM9    | ADAM metallopeptidase domain 9                                     | mRNA   |
| chr3  | 184324877 | 184325114 | 32 | + | 238 | EIF4G1   | eukaryotic translation initiation factor 4 gamma 1                 | mRNA   |
| chr3  | 121695488 | 121695667 | 32 | - | 364 | GOLGB1   | golgin B1                                                          | mRNA   |
| chr20 | 36093175  | 36093263  | 32 | + | 168 | EPB41L1  | erythrocyte membrane protein band 4.1 like 1                       | mRNA   |
| chr8  | 118296799 | 118296876 | 32 | - | 240 | SAMD12   | sterile alpha motif domain containing 12                           | mRNA   |
| chr5  | 181241815 | 181241891 | 32 | - | 77  | SNORD96A |                                                                    | snoRNA |
| chr18 | 724125    | 724203    | 32 | - | 81  | YES1     | YES proto-oncogene 1                                               | mRNA   |
| chr1  | 235111003 | 235111078 | 32 | - | 125 | TOMM20   | translocase of outer mitochondrial membrane 20                     | mRNA   |
| chr22 | 36266918  | 36267041  | 32 | + | 134 | APOL1    | apolipoprotein L1                                                  | mRNA   |
| chr16 | 68698884  | 68699012  | 32 | + | 138 | CDH3     | cadherin 3                                                         | mRNA   |
| chr1  | 183145344 | 183145475 | 32 | + | 164 | LAMC1    | laminin, gamma 1 (formerly LAMB2)                                  | mRNA   |
| chr17 | 48059835  | 48060026  | 32 | + | 192 | NFE2L1   | nuclear factor, erythroid 2 like 1                                 | mRNA   |
| chr15 | 60347338  | 60347492  | 32 | - | 215 | ANXA2    | annexin A2                                                         | mRNA   |
| chr15 | 60347496  | 60347552  | 32 | - | 215 | ANXA2    | annexin A2                                                         | mRNA   |
| chr14 | 64744153  | 64744206  | 32 | + | 227 | PLEKHG3  | pleckstrin homology and RhoGEF domain containing G3                | mRNA   |
| chr17 | 59840463  | 59840561  | 32 | + | 232 | VMP1     | vacuole membrane protein 1                                         | mRNA   |
| chr10 | 71299955  | 71300183  | 32 | + | 250 | UNC5B    | unc-5 netrin receptor B                                            | mRNA   |
| chr10 | 71300346  | 71300474  | 32 | + | 275 | UNC5B    | unc-5 netrin receptor B                                            | mRNA   |
| chr5  | 179726679 | 179726759 | 31 | + | 81  | CANX     | calnexin                                                           | mRNA   |
| chr8  | 119240164 | 119240320 | 31 | + | 157 | MAL2     | mal, T cell differentiation protein 2                              | mRNA   |
| chrX  | 53561780  | 53561924  | 31 | - | 170 | HUWE1    | HECT, UBA and WWE domain containing E3 ubiquitin protein ligase 1  | mRNA   |
| chr8  | 39042070  | 39042117  | 31 | + | 173 | ADAM9    | ADAM metallopeptidase domain 9                                     | mRNA   |
| chr3  | 196075240 | 196075360 | 31 | - | 203 | TFRC     | transferrin receptor                                               | mRNA   |
| chr11 | 71438941  | 71439083  | 31 | - | 206 | DHCR7    | 7-dehydrocholesterol reductase                                     | mRNA   |
| chr9  | 19378707  | 19378918  | 31 | - | 224 | RPS6     | ribosomal protein S6                                               | mRNA   |
| chr3  | 49531186  | 49531256  | 31 | + | 378 | DAG1     | dystroglycan 1                                                     | mRNA   |
| chr2  | 231456443 | 231456523 | 31 | - | 82  | SNORD20  |                                                                    | snoRNA |
| chr11 | 62854610  | 62854689  | 31 | - | 89  | SNORD28  |                                                                    | snoRNA |
| chr11 | 123058075 | 123058161 | 31 | - | 90  | SNORD14E |                                                                    | snoRNA |
| chr3  | 39411053  | 39411147  | 31 | + | 154 | SNORA62  |                                                                    | snoRNA |
| chr3  | 39411155  | 39411206  | 31 | + | 154 | SNORA62  |                                                                    | snoRNA |
| chr14 | 49895558  | 49895675  | 31 | + | 138 | ARF6     | ADP-ribosylation factor 6                                          | mRNA   |
| chr1  | 162523153 | 162523239 | 31 | + | 143 | UHMK1    | U2AF homology motif kinase 1                                       | mRNA   |
| chr6  | 75255641  | 75255788  | 31 | - | 148 | TMEM30A  | transmembrane protein 30A                                          | mRNA   |
| chr17 | 29261371  | 29261468  | 31 | - | 167 | NUFIP2   | nuclear FMR1 interacting protein 2                                 | mRNA   |
| chr2  | 138571924 | 138572109 | 31 | + | 190 | SPOPL    | speckle type BTB/POZ protein like                                  | mRNA   |
| chr19 | 582774    | 582993    | 31 | + | 220 | BSG      | basigin (Ok blood group)                                           | mRNA   |
| chr16 | 66723203  | 66723370  | 31 | - | 236 | DYNC1L2  | dynein cytoplasmic 1 light intermediate chain 2                    | mRNA   |
| chr5  | 141516341 | 141516565 | 31 | - | 248 | DIAPH1   | diaphanous related formin 1                                        | mRNA   |
| chr11 | 69651751  | 69651925  | 31 | + | 279 | CCND1    | cyclin D1                                                          | mRNA   |
| chr16 | 85806737  | 85806878  | 30 | + | 199 | COX4I1   | cytochrome c oxidase subunit 4I1                                   | mRNA   |
| chr8  | 116858351 | 116858458 | 30 | - | 108 | RAD21    | RAD21 cohesin complex component                                    | mRNA   |
| chr8  | 39023170  | 39023277  | 30 | + | 156 | ADAM9    | ADAM metallopeptidase domain 9                                     | mRNA   |
| chr8  | 39023279  | 39023325  | 30 | + | 156 | ADAM9    | ADAM metallopeptidase domain 9                                     | mRNA   |
| chr16 | 85804936  | 85805104  | 30 | + | 169 | COX4I1   | cytochrome c oxidase subunit 4I1                                   | mRNA   |
| chr17 | 7890570   | 7890683   | 30 | + | 172 | CHD3     | chromodomain helicase DNA binding protein 3                        | mRNA   |
| chr8  | 39017218  | 39017277  | 30 | + | 197 | ADAM9    | ADAM metallopeptidase domain 9                                     | mRNA   |

Supplementary Table S4\_Specific Peaks bound to PURa in CLIP-seq\_PURa vs IgG

|       |           |           |    |   |     |          |                                                                                |        |
|-------|-----------|-----------|----|---|-----|----------|--------------------------------------------------------------------------------|--------|
| chr8  | 39017313  | 39017396  | 30 | + | 197 | ADAM9    | ADAM metallopeptidase domain 9                                                 | mRNA   |
| chr19 | 40688692  | 40688774  | 30 | - | 191 | NUMBL    | NUMB like endocytic adaptor protein                                            | mRNA   |
| chr19 | 40688775  | 40688882  | 30 | - | 191 | NUMBL    | NUMB like endocytic adaptor protein                                            | mRNA   |
| chr7  | 44005005  | 44005167  | 30 | - | 229 | SPDYE1   | speedy/RINGO cell cycle regulator family member E1                             | mRNA   |
| chr7  | 47351882  | 47351972  | 30 | - | 246 | TNS3     | tensin 3                                                                       | mRNA   |
| chr18 | 35246782  | 35246835  | 30 | + | 287 | ZNF397   | zinc finger protein 397                                                        | mRNA   |
| chr3  | 48425838  | 48425958  | 30 | - | 298 | PLXNB1   | plexin B1                                                                      | mRNA   |
| chr9  | 133350094 | 133350164 | 30 | + | 71  | SNORD36B |                                                                                | snoRNA |
| chr3  | 184325695 | 184325771 | 30 | + | 78  | SNORD66  |                                                                                | snoRNA |
| chr5  | 138561033 | 138561110 | 30 | - | 78  | SNORD63  |                                                                                | snoRNA |
| chr19 | 49489965  | 49490047  | 30 | + | 88  | SNORD32A |                                                                                | snoRNA |
| chr12 | 56645012  | 56645094  | 30 | - | 105 | SNORD59A |                                                                                | snoRNA |
| chr17 | 38852832  | 38852994  | 30 | - | 195 | SNORA21  |                                                                                | snoRNA |
| chr15 | 98959955  | 98960038  | 30 | + | 84  | IGF1R    | insulin like growth factor 1 receptor                                          | mRNA   |
| chr12 | 12917244  | 12917341  | 30 | + | 98  | GPRC5A   | G protein-coupled receptor, class C, group 5, member A                         | mRNA   |
| chr1  | 183144964 | 183145107 | 30 | + | 144 | LAMC1    | laminin, gamma 1 (formerly LAMB2)                                              | mRNA   |
| chr12 | 120699143 | 120699270 | 30 | + | 144 | MLEC     | malectin                                                                       | mRNA   |
| chr9  | 34087834  | 34087939  | 30 | - | 145 | DCAF12   | DDB1 and CUL4 associated factor 12                                             | mRNA   |
| chr4  | 99062667  | 99062783  | 30 | + | 153 | METAP1   | methionyl aminopeptidase 1                                                     | mRNA   |
| chr16 | 18792911  | 18793017  | 30 | - | 153 | ARL6IP1  | ADP ribosylation factor like GTPase 6 interacting protein 1                    | mRNA   |
| chr16 | 18793026  | 18793063  | 30 | - | 153 | ARL6IP1  | ADP ribosylation factor like GTPase 6 interacting protein 1                    | mRNA   |
| chr1  | 112913654 | 112913820 | 30 | - | 249 | SLC16A1  | solute carrier family 16 member 1                                              | mRNA   |
| chr14 | 61278932  | 61278997  | 30 | - | 251 | TMEM30B  | transmembrane protein 30B                                                      | mRNA   |
| chr14 | 61279107  | 61279180  | 30 | - | 251 | TMEM30B  | transmembrane protein 30B                                                      | mRNA   |
| chr14 | 55672629  | 55672701  | 29 | + | 73  | KTN1     | kinectin 1                                                                     | mRNA   |
| chr8  | 39025802  | 39025884  | 29 | + | 83  | ADAM9    | ADAM metallopeptidase domain 9                                                 | mRNA   |
| chr5  | 179719667 | 179719781 | 29 | + | 115 | CANX     | calnexin                                                                       | mRNA   |
| chr1  | 209616470 | 209616624 | 29 | - | 155 | LAMB3    | laminin subunit beta 3                                                         | mRNA   |
| chr10 | 71819713  | 71819900  | 29 | - | 188 | PSAP     | prosaposin                                                                     | mRNA   |
| chrX  | 136879191 | 136879273 | 29 | - | 83  | RBMX     | RNA binding motif protein X-linked                                             | mRNA   |
| chr16 | 87738579  | 87738663  | 29 | - | 234 | KLHDC4   | kelch domain containing 4                                                      | mRNA   |
| chrX  | 151973532 | 151973751 | 29 | - | 235 | GABRE    | gamma-aminobutyric acid type A receptor epsilon subunit                        | mRNA   |
| chr18 | 3594772   | 3594912   | 29 | + | 268 | DLGAP1   | DLG associated protein 1                                                       | mRNA   |
| chr5  | 139284162 | 139284241 | 29 | + | 283 | MATR3    | matrin 3                                                                       | mRNA   |
| chr4  | 151103827 | 151103889 | 29 | + | 63  | SNORD73A |                                                                                | snoRNA |
| chr6  | 31541100  | 31541172  | 29 | - | 73  | SNORD84  |                                                                                | snoRNA |
| chr18 | 49491663  | 49491768  | 29 | - | 106 | SNORD58B |                                                                                | snoRNA |
| chr10 | 78040614  | 78040687  | 29 | + | 74  | RPS24    | ribosomal protein S24                                                          | mRNA   |
| chr2  | 38068867  | 38068966  | 29 | - | 100 | CYP1B1   | cytochrome P450 family 1 subfamily B member 1                                  | mRNA   |
| chr1  | 1056001   | 1056113   | 29 | + | 120 | AGRN     | agrin                                                                          | mRNA   |
| chr2  | 135783853 | 135783977 | 29 | + | 126 | UBXN4    | UBX domain protein 4                                                           | mRNA   |
| chr3  | 128070882 | 128071010 | 29 | + | 129 | SEC61A1  | SEC61 translocon alpha 1 subunit                                               | mRNA   |
| chr6  | 17615586  | 17615716  | 29 | - | 131 | NUP153   | nucleoporin 153                                                                | mRNA   |
| chr6  | 31268915  | 31269047  | 29 | - | 134 | HLA-C    | major histocompatibility complex                                               | mRNA   |
| chr18 | 723426    | 723558    | 29 | - | 135 | YES1     | YES proto-oncogene 1                                                           | mRNA   |
| chr18 | 723272    | 723413    | 29 | - | 143 | YES1     | YES proto-oncogene 1                                                           | mRNA   |
| chr6  | 109367577 | 109367726 | 29 | - | 150 | CD164    | CD164 molecule                                                                 | mRNA   |
| chr1  | 20652215  | 20652372  | 29 | - | 158 | DDOST    | dolichyl-diphosphooligosaccharide--protein glycosyltransferase non-catalytic s | mRNA   |
| chr12 | 130876191 | 130876259 | 29 | + | 160 | RAN      | RAN, member RAS oncogene family                                                | mRNA   |
| chr17 | 50751097  | 50751173  | 29 | + | 178 | LUC7L3   | LUC7 like 3 pre-mRNA splicing factor                                           | mRNA   |
| chr1  | 159918349 | 159918510 | 29 | - | 201 | TAGLN2   | transgelin 2                                                                   | mRNA   |
| chr9  | 5785890   | 5786106   | 29 | - | 217 | ERMP1    | endoplasmic reticulum metallopeptidase 1                                       | mRNA   |
| chr11 | 58618503  | 58618636  | 29 | + | 241 | ZFP91    | ZFP91 zinc finger protein                                                      | mRNA   |
| chr6  | 107871577 | 107871717 | 29 | - | 244 | SEC63    | SEC63 homolog, protein translocation regulator                                 | mRNA   |
| chr19 | 1272581   | 1272754   | 29 | + | 264 | CIRBP    | cold inducible RNA binding protein                                             | mRNA   |
| chr6  | 117707146 | 117707224 | 29 | + | 287 | NUS1     | nuclear undecaprenyl pyrophosphate synthase 1 homolog (S. cerevisiae)          | mRNA   |
| chr6  | 117707227 | 117707265 | 29 | + | 287 | NUS1     | nuclear undecaprenyl pyrophosphate synthase 1 homolog (S. cerevisiae)          | mRNA   |
| chr12 | 108645265 | 108645317 | 29 | - | 317 | CORO1C   | coronin 1C                                                                     | mRNA   |
| chr12 | 108645329 | 108645424 | 29 | - | 317 | CORO1C   | coronin 1C                                                                     | mRNA   |
| chr12 | 108645554 | 108645572 | 29 | - | 317 | CORO1C   | coronin 1C                                                                     | mRNA   |
| chr1  | 8861005   | 8861429   | 29 | - | 425 | ENO1     | enolase 1                                                                      | mRNA   |
| chr8  | 11847051  | 11847168  | 28 | - | 118 | CTSB     | cathepsin B                                                                    | mRNA   |
| chr1  | 114730507 | 114730648 | 28 | - | 142 | CSDE1    | cold shock domain containing E1                                                | mRNA   |
| chr8  | 116726061 | 116726162 | 28 | - | 148 | EIF3H    | eukaryotic translation initiation factor 3 subunit H                           | mRNA   |



Supplementary Table S4\_Specific Peaks bound to PURa in CLIP-seq\_PURa vs IgG

|       |           |           |    |   |     |            |                                                               |        |
|-------|-----------|-----------|----|---|-----|------------|---------------------------------------------------------------|--------|
| chr1  | 183110492 | 183110606 | 28 | + | 189 | LAMC1      | laminin, gamma 1 (formerly LAMB2)                             | mRNA   |
| chr8  | 118247959 | 118248058 | 28 | - | 102 | SAMD12     | sterile alpha motif domain containing 12                      | mRNA   |
| chr2  | 85543489  | 85543545  | 28 | + | 161 | MAT2A      | methionine adenosyltransferase 2A                             | mRNA   |
| chr11 | 64306472  | 64306576  | 28 | + | 171 | ESRRA      | estrogen related receptor alpha                               | mRNA   |
| chr7  | 55067991  | 55068033  | 28 | + | 244 | EGFR       | epidermal growth factor receptor                              | mRNA   |
| chr6  | 31835262  | 31835326  | 28 | + | 67  | SNORD48    |                                                               | snoRNA |
| chr12 | 56643682  | 56643750  | 28 | - | 73  | SNORD59B   |                                                               | snoRNA |
| chr6  | 31536373  | 31536449  | 28 | - | 77  | SNORD117   |                                                               | snoRNA |
| chr11 | 93731495  | 93731572  | 28 | - | 78  | SNORD6     |                                                               | snoRNA |
| chr17 | 2330283   | 2330364   | 28 | - | 82  | SNORD91A   |                                                               | snoRNA |
| chr18 | 49489233  | 49489309  | 28 | - | 90  | SNORD58C   |                                                               | snoRNA |
| chr11 | 93733214  | 93733294  | 28 | - | 104 | SNORD5     |                                                               | snoRNA |
| chr1  | 44775863  | 44775938  | 28 | + | 105 | SNORD55    |                                                               | snoRNA |
| chr20 | 2462955   | 2463035   | 28 | - | 114 | SNORD119   |                                                               | snoRNA |
| chr17 | 28722583  | 28722652  | 28 | + | 129 | SNORD4A    |                                                               | snoRNA |
| chr11 | 75400390  | 75400444  | 28 | + | 150 | SNORD15A   |                                                               | snoRNA |
| chr11 | 75400476  | 75400538  | 28 | + | 150 | SNORD15A   |                                                               | snoRNA |
| chr4  | 173322285 | 173322360 | 28 | + | 76  | GALNT7     | polypeptide N-acetylgalactosaminyltransferase 7               | mRNA   |
| chr16 | 68835369  | 68835470  | 28 | + | 124 | CDH1       | cadherin 1                                                    | mRNA   |
| chr16 | 16142142  | 16142253  | 28 | + | 128 | ABCC1      | ATP binding cassette subfamily C member 1                     | mRNA   |
| chr12 | 1787780   | 1787953   | 28 | + | 175 | ADIPOR2    | adiponectin receptor 2                                        | mRNA   |
| chr1  | 205715444 | 205715611 | 28 | - | 184 | NUCKS1     | nuclear casein kinase and cyclin-dependent kinase substrate 1 | mRNA   |
| chr1  | 119913625 | 119913722 | 28 | - | 196 | NOTCH2     | notch receptor 2                                              | mRNA   |
| chr17 | 29262813  | 29262899  | 28 | - | 220 | NUFIP2     | nuclear FMR1 interacting protein 2                            | mRNA   |
| chr17 | 29262903  | 29262968  | 28 | - | 220 | NUFIP2     | nuclear FMR1 interacting protein 2                            | mRNA   |
| chr5  | 1462139   | 1462202   | 28 | - | 222 | LPCAT1     | lysophosphatidylcholine acyltransferase 1                     | mRNA   |
| chr4  | 6696899   | 6697013   | 27 | + | 257 | S100P      | S100 calcium binding protein P                                | mRNA   |
| chr4  | 6697016   | 6697061   | 27 | + | 257 | S100P      | S100 calcium binding protein P                                | mRNA   |
| chr22 | 39522500  | 39522662  | 27 | + | 303 | ATF4       | activating transcription factor 4                             | mRNA   |
| chr3  | 49360176  | 49360382  | 27 | - | 207 | RHOA       | ras homolog family member A                                   | mRNA   |
| chr11 | 111296108 | 111296207 | 27 | - | 149 | COLCA1     | colorectal cancer associated 1                                | mRNA   |
| chr14 | 64186473  | 64186579  | 27 | + | 157 | SYNE2      | spectrin repeat containing nuclear envelope protein 2         | mRNA   |
| chr1  | 54853453  | 54853609  | 27 | - | 177 | DHCR24     | 24-dehydrocholesterol reductase                               | mRNA   |
| chr10 | 119049804 | 119049985 | 27 | - | 186 | EIF3A      | eukaryotic translation initiation factor 3 subunit A          | mRNA   |
| chr1  | 39568801  | 39568900  | 27 | - | 207 | PABPC4     | poly(A) binding protein cytoplasmic 4                         | mRNA   |
| chr17 | 2329116   | 2329208   | 27 | - | 137 | SNORD91B   |                                                               | snoRNA |
| chr1  | 93311197  | 93311289  | 27 | - | 109 | CCDC18-AS1 |                                                               | lncRNA |
| chr1  | 233384645 | 233384756 | 27 | + | 114 | MAP3K21    | mitogen-activated protein kinase kinase kinase 21             | mRNA   |
| chr14 | 75134282  | 75134351  | 27 | - | 120 | TMED10     | transmembrane p24 trafficking protein 10                      | mRNA   |
| chr19 | 53874630  | 53874762  | 27 | + | 138 | MYADM      | myeloid associated differentiation marker                     | mRNA   |
| chr17 | 50751354  | 50751504  | 27 | + | 151 | LUC7L3     | LUC7 like 3 pre-mRNA splicing factor                          | mRNA   |
| chr5  | 138934330 | 138934482 | 27 | + | 153 | CTNNA1     | catenin alpha 1                                               | mRNA   |
| chr12 | 48936802  | 48936921  | 27 | - | 165 | ARF3       | ADP ribosylation factor 3                                     | mRNA   |
| chr9  | 121340812 | 121340976 | 27 | - | 167 | STOM       | stomatin                                                      | mRNA   |
| chr15 | 77046057  | 77046206  | 27 | - | 180 | TSPAN3     | tetraspanin 3                                                 | mRNA   |
| chr2  | 20202187  | 20202295  | 27 | - | 187 | SDC1       | syndecan 1                                                    | mRNA   |
| chr13 | 29512318  | 29512460  | 27 | - | 196 | SLC7A1     | solute carrier family 7 member 1                              | mRNA   |
| chr2  | 200823394 | 200823541 | 27 | + | 199 | BZW1       | basic leucine zipper and W2 domains 1                         | mRNA   |
| chr17 | 40457482  | 40457687  | 27 | + | 206 | IGFBP4     | insulin-like growth factor binding protein 4                  | mRNA   |
| chr12 | 48938464  | 48938568  | 27 | - | 213 | ARF3       | ADP ribosylation factor 3                                     | mRNA   |
| chr12 | 48938570  | 48938676  | 27 | - | 213 | ARF3       | ADP ribosylation factor 3                                     | mRNA   |
| chr14 | 69714553  | 69714661  | 27 | + | 223 | SUSD6      | sushi domain containing 6                                     | mRNA   |
| chr11 | 2396940   | 2397067   | 27 | + | 299 | CD81       | CD81 molecule                                                 | mRNA   |
| chr7  | 131502621 | 131502678 | 27 | - | 192 | PODXL      | podocalyxin like                                              | mRNA   |
| chr7  | 131502680 | 131502811 | 27 | - | 192 | PODXL      | podocalyxin like                                              | mRNA   |
| chr14 | 55627911  | 55628028  | 26 | + | 118 | KTN1       | kinectin 1                                                    | mRNA   |
| chr14 | 55634525  | 55634658  | 26 | + | 134 | KTN1       | kinectin 1                                                    | mRNA   |
| chr2  | 218234352 | 218234454 | 26 | + | 143 | ARPC2      | actin related protein 2/3 complex subunit 2                   | mRNA   |
| chr15 | 76948409  | 76948471  | 26 | + | 144 | RCN2       | reticulocalbin 2                                              | mRNA   |
| chr12 | 56643402  | 56643587  | 26 | - | 186 | ATP5F1B    | ATP synthase F1 subunit beta                                  | mRNA   |
| chr1  | 156744162 | 156744348 | 26 | - | 187 | HDGF       | heparin binding growth factor                                 | mRNA   |
| chr3  | 105524417 | 105524491 | 26 | + | 233 | ALCAM      | activated leukocyte cell adhesion molecule                    | mRNA   |
| chr2  | 61537639  | 61537809  | 26 | - | 171 | XPO1       | exportin 1                                                    | mRNA   |
| chr19 | 6717539   | 6717624   | 26 | + | 86  | C3         | complement C3                                                 | mRNA   |

Supplementary Table S4\_Specific Peaks bound to PURa in CLIP-seq\_PURa vs IgG

|       |           |           |    |   |     |           |                                                               |        |
|-------|-----------|-----------|----|---|-----|-----------|---------------------------------------------------------------|--------|
| chr8  | 118292322 | 118292436 | 26 | - | 115 | SAMD12    | sterile alpha motif domain containing 12                      | mRNA   |
| chr19 | 40687906  | 40688041  | 26 | - | 137 | NUMBL     | NUMB like endocytic adaptor protein                           | mRNA   |
| chr17 | 59837965  | 59838108  | 26 | + | 144 | VMP1      | vacuole membrane protein 1                                    | mRNA   |
| chr8  | 117957785 | 117957885 | 26 | - | 178 | EXT1      | exostosin glycosyltransferase 1                               | mRNA   |
| chr12 | 54285911  | 54285967  | 26 | + | 217 | HNRNPA1   | heterogeneous nuclear ribonucleoprotein A1                    | mRNA   |
| chr16 | 87741814  | 87742004  | 26 | - | 271 | KLHDC4    | kelch domain containing 4                                     | mRNA   |
| chr18 | 49491282  | 49491348  | 26 | - | 85  | SNORD58A  |                                                               | snoRNA |
| chr16 | 58548498  | 58548622  | 26 | - | 125 | SNORA46   |                                                               | snoRNA |
| chr3  | 39408398  | 39408539  | 26 | + | 168 | SNORA6    |                                                               | snoRNA |
| chr11 | 75404420  | 75404570  | 26 | + | 172 | SNORD158  |                                                               | snoRNA |
| chr2  | 86135869  | 86136006  | 26 | + | 185 | SNORD94   |                                                               | snoRNA |
| chr3  | 149173144 | 149173239 | 26 | - | 96  | HPS3      | HPS3 biogenesis of lysosomal organelles complex 2 subunit 1   | mRNA   |
| chr11 | 70435266  | 70435365  | 26 | + | 105 | CTTN      | cortactin                                                     | mRNA   |
| chr3  | 194402947 | 194403050 | 26 | - | 105 | ATP13A3   | ATPase 13A3                                                   | mRNA   |
| chr5  | 168549666 | 168549775 | 26 | - | 110 | PANK3     | pantothenate kinase 3                                         | mRNA   |
| chr3  | 105575926 | 105576040 | 26 | + | 115 | ALCAM     | activated leukocyte cell adhesion molecule                    | mRNA   |
| chr16 | 18791691  | 18791735  | 26 | - | 129 | ARL6IP1   | ADP ribosylation factor like GTPase 6 interacting protein 1   | mRNA   |
| chr16 | 18791749  | 18791815  | 26 | - | 129 | ARL6IP1   | ADP ribosylation factor like GTPase 6 interacting protein 1   | mRNA   |
| chr6  | 47232051  | 47232158  | 26 | - | 137 | TNFRSF21  | tumor necrosis factor receptor superfamily, member 21         | mRNA   |
| chr1  | 235111208 | 235111348 | 26 | - | 141 | TOMM20    | translocase of outer mitochondrial membrane 20                | mRNA   |
| chr17 | 5024230   | 5024354   | 26 | + | 150 | KIF1C     | kinesin family member 1C                                      | mRNA   |
| chr1  | 31908756  | 31908913  | 26 | - | 158 | PTP4A2    | protein tyrosine phosphatase 4A2                              | mRNA   |
| chr6  | 122444756 | 122444916 | 26 | - | 161 | SERINC1   | serine incorporator 1                                         | mRNA   |
| chr16 | 56362014  | 56362098  | 26 | - | 168 | AMFR      | autocrine motility factor receptor                            | mRNA   |
| chr1  | 40073334  | 40073439  | 26 | - | 186 | PPT1      | palmitoyl-protein thioesterase 1                              | mRNA   |
| chr18 | 31548623  | 31548716  | 26 | + | 194 | DSG2      | desmoglein 2                                                  | mRNA   |
| chr9  | 111933600 | 111933648 | 26 | + | 196 | UGCG      | UDP-glucose ceramide glucosyltransferase                      | mRNA   |
| chr11 | 64823848  | 64824016  | 26 | - | 211 | CDC42BPG  | CDC42 binding protein kinase gamma (DMPK-like)                | mRNA   |
| chr8  | 97852241  | 97852337  | 26 | + | 215 | LAPTM4B   | lysosomal protein transmembrane 4 beta                        | mRNA   |
| chr8  | 97852361  | 97852410  | 26 | + | 215 | LAPTM4B   | lysosomal protein transmembrane 4 beta                        | mRNA   |
| chr15 | 98963364  | 98963523  | 26 | + | 293 | IGF1R     | insulin like growth factor 1 receptor                         | mRNA   |
| chr6  | 36601961  | 36602272  | 26 | + | 312 | SRSF3     | serine and arginine rich splicing factor 3                    | mRNA   |
| chr12 | 49761703  | 49761779  | 25 | + | 77  | TMBIM6    | transmembrane BAX inhibitor motif containing 6                | mRNA   |
| chr16 | 87841049  | 87841155  | 25 | - | 123 | SLC7A5    | solute carrier family 7 member 5                              | mRNA   |
| chr1  | 116398929 | 116399016 | 25 | + | 154 | ATP1A1    |                                                               | mRNA   |
| chr12 | 110343358 | 110343418 | 25 | + | 211 | ATP2A2    | ATPase sarcoplasmic/endoplasmic reticulum Ca2+ transporting 2 | mRNA   |
| chr1  | 43588772  | 43589000  | 25 | + | 271 | PTPRF     | protein tyrosine phosphatase receptor type F                  | mRNA   |
| chr11 | 35194673  | 35194718  | 25 | + | 130 | CD44      | CD44 molecule                                                 | mRNA   |
| chr8  | 118039936 | 118040045 | 25 | - | 152 | EXT1      | exostosin glycosyltransferase 1                               | mRNA   |
| chr19 | 47720444  | 47720632  | 25 | + | 189 | EHD2      | EH domain containing 2                                        | mRNA   |
| chr7  | 47352237  | 47352366  | 25 | - | 202 | TNS3      | tensin 3                                                      | mRNA   |
| chr6  | 85677576  | 85677658  | 25 | - | 83  | SNORD50B  |                                                               | snoRNA |
| chr16 | 70529512  | 70529585  | 25 | + | 89  | SNORD111B |                                                               | snoRNA |
| chr2  | 28927982  | 28928060  | 25 | + | 122 | SNORD53B  |                                                               | snoRNA |
| chr1  | 44776479  | 44776589  | 25 | + | 147 | SNORD46   |                                                               | snoRNA |
| chr22 | 39312897  | 39312970  | 25 | - | 74  | RPL3      | ribosomal protein L3                                          | mRNA   |
| chr11 | 102398815 | 102398891 | 25 | - | 80  | TMEM123   | transmembrane protein 123                                     | mRNA   |
| chr12 | 112508317 | 112508409 | 25 | + | 104 | PTPN11    | protein tyrosine phosphatase non-receptor type 11             | mRNA   |
| chr14 | 69771536  | 69771644  | 25 | + | 114 | SRSF5     | serine and arginine rich splicing factor 5                    | mRNA   |
| chr6  | 47232710  | 47232789  | 25 | - | 135 | TNFRSF21  | tumor necrosis factor receptor superfamily, member 21         | mRNA   |
| chr16 | 18792568  | 18792621  | 25 | - | 148 | ARL6IP1   | ADP ribosylation factor like GTPase 6 interacting protein 1   | mRNA   |
| chr9  | 5785630   | 5785767   | 25 | - | 149 | ERMP1     | endoplasmic reticulum metalloproteinase 1                     | mRNA   |
| chr4  | 105970119 | 105970173 | 25 | + | 155 | NPNT      | nephronectin                                                  | mRNA   |
| chr4  | 105970186 | 105970235 | 25 | + | 155 | NPNT      | nephronectin                                                  | mRNA   |
| chr8  | 97852048  | 97852201  | 25 | + | 166 | LAPTM4B   | lysosomal protein transmembrane 4 beta                        | mRNA   |
| chr2  | 128190780 | 128190951 | 25 | + | 172 | UGGT1     | UDP-glucose glycoprotein glucosyltransferase 1                | mRNA   |
| chr2  | 86777291  | 86777440  | 25 | + | 175 | RMND5A    | required for meiotic nuclear division 5 homolog A             | mRNA   |
| chr5  | 140706172 | 140706311 | 25 | + | 179 | ZMAT2     | zinc finger matrin-type 2                                     | mRNA   |
| chr8  | 97851933  | 97851967  | 25 | + | 189 | LAPTM4B   | lysosomal protein transmembrane 4 beta                        | mRNA   |
| chr8  | 97851968  | 97852032  | 25 | + | 189 | LAPTM4B   | lysosomal protein transmembrane 4 beta                        | mRNA   |
| chr9  | 129739076 | 129739256 | 25 | - | 206 | PTGES     | prostaglandin E synthase                                      | mRNA   |
| chr17 | 57006172  | 57006376  | 25 | + | 207 | SCPEP1    | serine carboxypeptidase 1                                     | mRNA   |
| chr14 | 55661537  | 55661606  | 24 | + | 70  | KTN1      | kinectin 1                                                    | mRNA   |
| chr5  | 10394081  | 10394143  | 24 | + | 70  | MARCHF6   | membrane associated ring-CH-type finger 6                     | mRNA   |

Supplementary Table S4\_Specific Peaks bound to PURa in CLIP-seq\_PURa vs IgG

|       |           |           |    |   |     |           |                                                                  |               |
|-------|-----------|-----------|----|---|-----|-----------|------------------------------------------------------------------|---------------|
| chr14 | 55633234  | 55633321  | 24 | + | 88  | KTN1      | kinectin 1                                                       | mRNA          |
| chr14 | 55636448  | 55636536  | 24 | + | 89  | KTN1      | kinectin 1                                                       | mRNA          |
| chr10 | 71821875  | 71822007  | 24 | - | 133 | PSAP      | prosaposin                                                       | mRNA          |
| chr6  | 137203546 | 137203675 | 24 | - | 179 | IFNGR1    | interferon gamma receptor 1                                      | mRNA          |
| chr1  | 183130343 | 183130549 | 24 | + | 207 | LAMC1     | laminin, gamma 1 (formerly LAMB2)                                | mRNA          |
| chr22 | 17025077  | 17025131  | 24 | - | 104 |           |                                                                  | no annotation |
| chr22 | 29291001  | 29291079  | 24 | + | 139 | EWSR1     | EWS RNA binding protein 1                                        | mRNA          |
| chr11 | 62531254  | 62531364  | 24 | - | 149 | AHNAK     | AHNAK nucleoprotein                                              | mRNA          |
| chr8  | 118288852 | 118288965 | 24 | - | 159 | SAMD12    | sterile alpha motif domain containing 12                         | mRNA          |
| chr11 | 1745744   | 1745847   | 24 | - | 209 | IFITM10   | interferon induced transmembrane protein 10                      | mRNA          |
| chr3  | 52692742  | 52692804  | 24 | + | 63  | SNORD69   |                                                                  | snoRNA        |
| chr20 | 2656937   | 2657012   | 24 | + | 76  | SNORD57   |                                                                  | snoRNA        |
| chr17 | 76561635  | 76561703  | 24 | + | 78  | SNORD1A   |                                                                  | snoRNA        |
| chr2  | 202291334 | 202291420 | 24 | + | 88  | SNORD11B  |                                                                  | snoRNA        |
| chr2  | 28927066  | 28927150  | 24 | + | 91  | SNORD53   |                                                                  | snoRNA        |
| chr1  | 30968160  | 30968235  | 24 | - | 95  | SNORD103C |                                                                  | snoRNA        |
| chr11 | 123059326 | 123059445 | 24 | - | 120 | SNORD14C  |                                                                  | snoRNA        |
| chr4  | 82895853  | 82895926  | 24 | - | 131 | SNORD143  |                                                                  | snoRNA        |
| chr17 | 28720498  | 28720636  | 24 | + | 170 | SNORD42B  |                                                                  | snoRNA        |
| chr19 | 40943749  | 40943799  | 24 | + | 88  | CYP2B7P   |                                                                  | pseudo        |
| chr20 | 51597494  | 51597573  | 24 | - | 80  | ATP9A     | ATPase phospholipid transporting 9A                              | mRNA          |
| chr14 | 21210586  | 21210680  | 24 | - | 97  | HNRNPC    | heterogeneous nuclear ribonucleoprotein C                        | mRNA          |
| chr16 | 19121087  | 19121174  | 24 | + | 97  | ITPRIPL2  | inositol 1,4,5-trisphosphate receptor interacting protein-like 2 | mRNA          |
| chr1  | 26854797  | 26854897  | 24 | + | 102 | ZDHHC18   | zinc finger DHHC-type containing 18                              | mRNA          |
| chr19 | 15160331  | 15160442  | 24 | - | 113 | NOTCH3    | notch receptor 3                                                 | mRNA          |
| chr7  | 140453252 | 140453292 | 24 | - | 119 | MKRN1     | makorin ring finger protein 1                                    | mRNA          |
| chr7  | 140453335 | 140453370 | 24 | - | 119 | MKRN1     | makorin ring finger protein 1                                    | mRNA          |
| chr14 | 75131804  | 75131930  | 24 | - | 127 | TMED10    | transmembrane p24 trafficking protein 10                         | mRNA          |
| chr20 | 45325971  | 45326097  | 24 | - | 127 | SDC4      | syndecan 4                                                       | mRNA          |
| chr6  | 7289522   | 7289652   | 24 | - | 133 | SSR1      | signal sequence receptor subunit 1                               | mRNA          |
| chr11 | 10307205  | 10307340  | 24 | + | 136 | ADM       | adrenomedullin                                                   | mRNA          |
| chr22 | 45600839  | 45600983  | 24 | + | 145 | FBLN1     | fibulin 1                                                        | mRNA          |
| chr19 | 53874496  | 53874627  | 24 | + | 145 | MYADM     | myeloid associated differentiation marker                        | mRNA          |
| chr3  | 108046054 | 108046099 | 24 | - | 179 | CD47      | CD47 molecule                                                    | mRNA          |
| chr12 | 113390224 | 113390366 | 24 | + | 216 | PLBD2     | phospholipase B domain containing 2                              | mRNA          |
| chr1  | 10419689  | 10419847  | 24 | + | 257 | PGD       | phosphogluconate dehydrogenase                                   | mRNA          |
| chr16 | 1701024   | 1701184   | 24 | + | 262 | JPT2      | Jupiter microtubule associated homolog 2                         | mRNA          |
| chr14 | 67677026  | 67677116  | 24 | - | 330 | RDH11     | retinol dehydrogenase 11                                         | mRNA          |
| chr15 | 78897048  | 78897220  | 24 | + | 342 | MORF4L1   | mortality factor 4 like 1                                        | mRNA          |
| chr15 | 78897267  | 78897328  | 24 | + | 342 | MORF4L1   | mortality factor 4 like 1                                        | mRNA          |
| chr22 | 38483521  | 38483620  | 24 | - | 101 | DDX17     | DEAD-box helicase 17                                             | mRNA          |
| chr6  | 113860605 | 113860679 | 23 | + | 273 | MARCKS    | myristoylated alanine-rich protein kinase C substrate            | mRNA          |
| chr17 | 58005356  | 58005410  | 23 | - | 300 | SRSF1     | serine and arginine rich splicing factor 1                       | mRNA          |
| chr14 | 55675834  | 55675918  | 23 | + | 85  | KTN1      | kinectin 1                                                       | mRNA          |
| chr1  | 43620873  | 43620992  | 23 | + | 120 | PTPRF     | protein tyrosine phosphatase receptor type F                     | mRNA          |
| chr5  | 133097166 | 133097286 | 23 | + | 121 | HSPA4     | heat shock protein family A (Hsp70) member 4                     | mRNA          |
| chr12 | 110327563 | 110327674 | 23 | + | 133 | ATP2A2    | ATPase sarcoplasmic/endoplasmic reticulum Ca2+ transporting 2    | mRNA          |
| chr16 | 85805709  | 85805864  | 23 | + | 158 | COX4I1    | cytochrome c oxidase subunit 4I1                                 | mRNA          |
| chr10 | 32919884  | 32919984  | 23 | - | 178 | ITGB1     | integrin subunit beta 1                                          | mRNA          |
| chr8  | 100721390 | 100721472 | 23 | - | 191 | PABPC1    | poly(A) binding protein cytoplasmic 1                            | mRNA          |
| chr10 | 119042006 | 119042212 | 23 | - | 207 | EIF3A     | eukaryotic translation initiation factor 3 subunit A             | mRNA          |
| chr8  | 118038993 | 118039113 | 23 | - | 121 | EXT1      | exostosin glycosyltransferase 1                                  | mRNA          |
| chr21 | 38808461  | 38808601  | 23 | + | 145 | ETS2      | ETS proto-oncogene 2                                             | mRNA          |
| chr1  | 20774287  | 20774433  | 23 | - | 147 | HP1BP3    | heterochromatin protein 1 binding protein 3                      | mRNA          |
| chr1  | 20774611  | 20774699  | 23 | - | 159 | HP1BP3    | heterochromatin protein 1 binding protein 3                      | mRNA          |
| chr9  | 129338864 | 129339032 | 23 | + | 235 | LINC01503 |                                                                  | lncRNA        |
| chr9  | 122880223 | 122880306 | 23 | - | 84  | SNORD90   |                                                                  | snoRNA        |
| chr2  | 202293057 | 202293141 | 23 | + | 90  | SNORD11   |                                                                  | snoRNA        |
| chr15 | 66502809  | 66502911  | 23 | - | 104 | SNORD16   |                                                                  | snoRNA        |
| chr11 | 93721603  | 93721712  | 23 | + | 112 | SCARNA9   |                                                                  | scaRNA        |
| chr14 | 95533567  | 95533629  | 23 | - | 188 | SCARNA13  |                                                                  | scaRNA        |
| chr9  | 112218970 | 112219069 | 23 | - | 103 | PTBP3     | polypyrimidine tract binding protein 3                           | mRNA          |
| chr6  | 106970836 | 106970914 | 23 | - | 106 | CD24      | CD24 molecule                                                    | mRNA          |
| chr6  | 106970924 | 106970939 | 23 | - | 106 | CD24      | CD24 molecule                                                    | mRNA          |

Supplementary Table S4\_Specific Peaks bound to PURa in CLIP-seq\_PURa vs IgG

|       |           |           |    |   |     |             |                                                                          |        |
|-------|-----------|-----------|----|---|-----|-------------|--------------------------------------------------------------------------|--------|
| chr7  | 135928959 | 135929034 | 23 | - | 117 | MTPN        | myotrophin                                                               | mRNA   |
| chr2  | 20201983  | 20202097  | 23 | - | 126 | SDC1        | syndecan 1                                                               | mRNA   |
| chr16 | 81380504  | 81380612  | 23 | + | 127 | GAN         | gigaxonin                                                                | mRNA   |
| chr1  | 169132215 | 169132330 | 23 | + | 127 | ATP1B1      | ATPase Na <sup>+</sup> /K <sup>+</sup> transporting subunit beta 1       | mRNA   |
| chr20 | 3805532   | 3805616   | 23 | + | 149 | CDC25B      | cell division cycle 25B                                                  | mRNA   |
| chr1  | 32043358  | 32043489  | 23 | + | 161 | KHDRBS1     | KH RNA binding domain containing, signal transduction associated 1       | mRNA   |
| chr15 | 68207990  | 68208077  | 23 | - | 163 | CLN6        | CLN6 transmembrane ER protein                                            | mRNA   |
| chr8  | 22005431  | 22005611  | 23 | + | 181 | XPO7        | exportin 7                                                               | mRNA   |
| chr17 | 4733751   | 4733872   | 23 | - | 181 | CXCL16      | C-X-C motif chemokine ligand 16                                          | mRNA   |
| chr2  | 65269345  | 65269395  | 23 | + | 186 | ACTR2       | actin related protein 2                                                  | mRNA   |
| chr8  | 125021916 | 125022085 | 23 | + | 187 | SQLE        | squalene epoxidase                                                       | mRNA   |
| chr15 | 98959655  | 98959767  | 23 | + | 205 | IGF1R       | insulin like growth factor 1 receptor                                    | mRNA   |
| chr2  | 201380401 | 201380516 | 23 | - | 208 | TRAK2       | trafficking kinesin protein 2                                            | mRNA   |
| chr17 | 5024627   | 5024716   | 23 | + | 210 | KIF1C       | kinesin family member 1C                                                 | mRNA   |
| chr5  | 10434263  | 10434357  | 23 | + | 211 | MARCHF6     | membrane associated ring-CH-type finger 6                                | mRNA   |
| chr1  | 42178162  | 42178266  | 23 | - | 249 | FOXJ3       | forkhead box J3                                                          | mRNA   |
| chr9  | 128695190 | 128695305 | 23 | + | 294 | SET         | SET nuclear proto-oncogene                                               | mRNA   |
| chr15 | 64156047  | 64156145  | 23 | - | 298 | PIPB        | peptidylprolyl isomerase B (cyclophilin B)                               | mRNA   |
| chr11 | 62571837  | 62571901  | 22 | - | 65  | EEF1G       | eukaryotic translation elongation factor 1 gamma                         | mRNA   |
| chr12 | 103931520 | 103931623 | 22 | + | 104 | HSP90B1     | heat shock protein 90 beta family member 1                               | mRNA   |
| chr1  | 114726982 | 114727090 | 22 | - | 109 | CSDE1       | cold shock domain containing E1                                          | mRNA   |
| chr11 | 130122369 | 130122425 | 22 | + | 210 | APLP2       | amyloid beta precursor like protein 2                                    | mRNA   |
| chr10 | 119042359 | 119042512 | 22 | - | 247 | EIF3A       | eukaryotic translation initiation factor 3 subunit A                     | mRNA   |
| chr6  | 30616608  | 30616642  | 22 | - | 180 | PPP1R10     | protein phosphatase 1 regulatory subunit 10                              | mRNA   |
| chr11 | 65085812  | 65085919  | 22 | + | 122 | ZFPL1       | zinc finger protein like 1                                               | mRNA   |
| chr11 | 62529113  | 62529234  | 22 | - | 122 | AHNAK       | AHNAK nucleoprotein                                                      | mRNA   |
| chr20 | 49694844  | 49694935  | 22 | - | 124 | B4GALT5     | UDP-Gal:betaGlcNAc beta 1,4- galactosyltransferase, polypeptide 5        | mRNA   |
| chr19 | 47721068  | 47721130  | 22 | + | 138 | EHD2        | EH domain containing 2                                                   | mRNA   |
| chr1  | 43596749  | 43596889  | 22 | + | 141 | PTPRF       | protein tyrosine phosphatase receptor type F                             | mRNA   |
| chr1  | 42850072  | 42850211  | 22 | + | 150 | ZNF691      | zinc finger protein 691                                                  | mRNA   |
| chr18 | 2686661   | 2686767   | 22 | + | 151 | SMCHD1      | structural maintenance of chromosomes flexible hinge domain containing 1 | mRNA   |
| chr1  | 70231445  | 70231545  | 22 | + | 120 | SRSF11      | serine and arginine rich splicing factor 1                               | mRNA   |
| chr8  | 56073836  | 56073910  | 22 | - | 75  | SNORD54     |                                                                          | snoRNA |
| chr17 | 28723688  | 28723765  | 22 | + | 83  | SNORD4B     |                                                                          | snoRNA |
| chr1  | 92837288  | 92837392  | 22 | + | 105 | SNORD21     |                                                                          | snoRNA |
| chr14 | 20323178  | 20323328  | 22 | - | 151 | SNORA79B    |                                                                          | snoRNA |
| chr21 | 8392878   | 8393113   | 22 | + | 236 | RNA18SN3    |                                                                          | rRNA   |
| chr21 | 8209842   | 8210079   | 22 | + | 249 | RNA18SN2    |                                                                          | rRNA   |
| chr5  | 179836931 | 179837005 | 22 | + | 76  | SQSTM1      | sequestosome 1                                                           | mRNA   |
| chr11 | 33709235  | 33709325  | 22 | - | 91  | CD59        | CD59 molecule                                                            | mRNA   |
| chr16 | 19116681  | 19116776  | 22 | + | 96  | ITPR1L2     | inositol 1,4,5-trisphosphate receptor interacting protein-like 2         | mRNA   |
| chr1  | 209786515 | 209786619 | 22 | - | 105 | IRF6        | interferon regulatory factor 6                                           | mRNA   |
| chr1  | 22091815  | 22091913  | 22 | + | 106 | CDC42       | Cell Division Cycle 42                                                   | mRNA   |
| chr3  | 149173560 | 149173678 | 22 | - | 126 | HPS3        | HPS3 biogenesis of lysosomal organelles complex 2 subunit 1              | mRNA   |
| chr6  | 34587732  | 34587773  | 22 | - | 138 | ILRUN       | inflammation and lipid regulator with UBA-like and NBR1-like domains     | mRNA   |
| chr6  | 34587776  | 34587845  | 22 | - | 138 | ILRUN       | inflammation and lipid regulator with UBA-like and NBR1-like domains     | mRNA   |
| chr9  | 133362844 | 133362987 | 22 | - | 144 | SURF4       | surfeit 4                                                                | mRNA   |
| chr17 | 37086315  | 37086420  | 22 | - | 144 | ACACA       | acetyl-CoA carboxylase alpha                                             | mRNA   |
| chr17 | 47682892  | 47683041  | 22 | + | 150 | KPNB1       | karyopherin subunit beta 1                                               | mRNA   |
| chr9  | 130139331 | 130139450 | 22 | + | 151 | GPR107      | G protein-coupled receptor 107                                           | mRNA   |
| chr9  | 33112008  | 33112100  | 22 | - | 157 | B4GALT1     | beta-1,4-galactosyltransferase 1                                         | mRNA   |
| chr12 | 48937017  | 48937127  | 22 | - | 170 | ARF3        | ADP ribosylation factor 3                                                | mRNA   |
| chr10 | 114434303 | 114434377 | 22 | - | 171 | ABLIM1      | actin binding LIM protein 1                                              | mRNA   |
| chr2  | 218254115 | 218254155 | 22 | + | 180 | ARPC2       | actin related protein 2/3 complex subunit 2                              | mRNA   |
| chr1  | 53246893  | 53247056  | 22 | - | 180 | <b>LRP8</b> | LDL receptor related protein 8                                           | mRNA   |
| chr1  | 1785392   | 1785454   | 22 | - | 186 | GNB1        | G protein subunit beta 1                                                 | mRNA   |
| chr14 | 70371170  | 70371366  | 22 | - | 230 | SYNJ2BP-COX | SYNJ2BP-COX16 readthrough                                                | mRNA   |
| chr3  | 152464729 | 152464862 | 22 | + | 264 | MBNL1       | muscleblind like splicing regulator 1                                    | mRNA   |
| chr8  | 39054480  | 39054524  | 21 | + | 45  | ADAM9       | ADAM metallopeptidase domain 9                                           | mRNA   |
| chr14 | 55671565  | 55671627  | 21 | + | 63  | KTN1        | kinectin 1                                                               | mRNA   |
| chr5  | 10426389  | 10426489  | 21 | + | 101 | MARCHF6     | membrane associated ring-CH-type finger 6                                | mRNA   |
| chr1  | 230250456 | 230250560 | 21 | + | 105 | GALNT2      | polypeptide N-acetylgalactosaminyltransferase 2                          | mRNA   |
| chr18 | 36109618  | 36109683  | 21 | - | 128 | SLC39A6     | solute carrier family 39 member 6                                        | mRNA   |
| chr3  | 184324200 | 184324347 | 21 | + | 148 | EIF4G1      | eukaryotic translation initiation factor 4 gamma 1                       | mRNA   |

Supplementary Table S4\_Specific Peaks bound to PURa in CLIP-seq\_PURa vs IgG

|       |           |           |    |   |     |           |                                                                      |               |
|-------|-----------|-----------|----|---|-----|-----------|----------------------------------------------------------------------|---------------|
| chr19 | 48913053  | 48913128  | 21 | + | 187 | NUCB1     | nucleobindin 1                                                       | mRNA          |
| chr8  | 47807136  | 47807299  | 21 | - | 200 | PRKDC     | protein kinase, DNA-activated, catalytic subunit                     | mRNA          |
| chr18 | 3451868   | 3451953   | 21 | + | 141 | TGIF1     | TGFB induced factor homeobox 1                                       | mRNA          |
| chr8  | 118285059 | 118285108 | 21 | - | 101 | SAMD12    | sterile alpha motif domain containing 12                             | mRNA          |
| chrX  | 120438720 | 120438854 | 21 | - | 135 | LAMP2     | lysosomal associated membrane protein 2                              | mRNA          |
| chr1  | 1391160   | 1391243   | 21 | - | 153 | CCNL2     | cyclin L2                                                            | mRNA          |
| chr18 | 3455220   | 3455281   | 21 | + | 172 | TGIF1     | TGFB induced factor homeobox 1                                       | mRNA          |
| chr7  | 97971624  | 97971728  | 21 | - | 157 | CZ1P-ASNS |                                                                      | lncRNA        |
| chr5  | 86620506  | 86620573  | 21 | + | 86  | SNORD138  |                                                                      | snoRNA        |
| chr17 | 28723417  | 28723492  | 21 | + | 91  | SNORD42A  |                                                                      | snoRNA        |
| chr19 | 50802328  | 50802416  | 21 | - | 118 | SNORD88C  |                                                                      | snoRNA        |
| chr5  | 40832642  | 40832732  | 21 | - | 128 | SNORD72   |                                                                      | snoRNA        |
| chr9  | 127448500 | 127448637 | 21 | - | 148 | SNORA65   |                                                                      | snoRNA        |
| chr1  | 28580919  | 28581053  | 21 | - | 174 | SNORA16A  |                                                                      | snoRNA        |
| chr2  | 202206714 | 202206802 | 21 | - | 89  | SUMO1     | small ubiquitin like modifier 1                                      | mRNA          |
| chr6  | 75253308  | 75253394  | 21 | - | 90  | TMEM30A   | transmembrane protein 30A                                            | mRNA          |
| chr10 | 87754296  | 87754390  | 21 | - | 101 | ATAD1     | ATPase family AAA domain containing 1                                | mRNA          |
| chr3  | 128620028 | 128620101 | 21 | - | 111 | RPN1      | ribophorin 1                                                         | mRNA          |
| chr12 | 111809692 | 111809760 | 21 | + | 120 | ALDH2     | aldehyde dehydrogenase 2 family member                               | mRNA          |
| chr6  | 79201635  | 79201726  | 21 | - | 122 | HMG3      | high mobility group nucleosomal binding domain 3                     | mRNA          |
| chr11 | 57816697  | 57816773  | 21 | + | 129 | CTNND1    | catenin delta 1                                                      | mRNA          |
| chr6  | 34588848  | 34588959  | 21 | - | 136 | ILRUN     | inflammation and lipid regulator with UBA-like and NBR1-like domains | mRNA          |
| chr2  | 37105709  | 37105763  | 21 | - | 138 | EIF2AK2   | eukaryotic translation initiation factor 2 alpha kinase 2            | mRNA          |
| chr2  | 37105769  | 37105833  | 21 | - | 138 | EIF2AK2   | eukaryotic translation initiation factor 2 alpha kinase 2            | mRNA          |
| chr6  | 7287549   | 7287691   | 21 | - | 143 | SSR1      | signal sequence receptor subunit 1                                   | mRNA          |
| chr11 | 121633103 | 121633249 | 21 | + | 148 | SORL1     | sortilin related receptor 1                                          | mRNA          |
| chr6  | 99400161  | 99400240  | 21 | - | 164 | PNISR     | PNN interacting serine and arginine rich protein                     | mRNA          |
| chr3  | 49534191  | 49534262  | 21 | + | 179 | DAG1      | dystroglycan 1                                                       | mRNA          |
| chr12 | 49763501  | 49763681  | 21 | + | 181 | TMBIM6    | transmembrane BAX inhibitor motif containing 7                       | mRNA          |
| chr3  | 31637420  | 31637462  | 21 | + | 183 | STT3B     | STT3 oligosaccharyltransferase complex catalytic subunit B           | mRNA          |
| chr1  | 35715234  | 35715359  | 21 | - | 186 | C1orf216  | chromosome 1 open reading frame 216                                  | mRNA          |
| chr1  | 225497342 | 225497425 | 21 | - | 208 | ENAH      | ENAH actin regulator                                                 | mRNA          |
| chr2  | 131051855 | 131051947 | 21 | - | 226 | FAM168B   | family with sequence similarity 168 member B                         | mRNA          |
| chrX  | 41348613  | 41348762  | 21 | + | 238 | DDX3X     | DEAD-box helicase 3 X-linked                                         | mRNA          |
| chr12 | 53041270  | 53041420  | 21 | + | 238 | EIF4B     | eukaryotic translation initiation factor 4B                          | mRNA          |
| chr13 | 113264490 | 113264627 | 21 | + | 247 | CUL4A     | cullin 4A                                                            | mRNA          |
| chr8  | 100717772 | 100717888 | 20 | - | 117 | PABPC1    | poly(A) binding protein cytoplasmic 1                                | mRNA          |
| chr12 | 21654542  | 21654659  | 20 | - | 118 | LDHB      | lactate dehydrogenase B                                              | mRNA          |
| chr1  | 30995064  | 30995178  | 20 | - | 126 | PUM1      | pumilio RNA binding family member 1                                  | mRNA          |
| chr11 | 10802293  | 10802421  | 20 | - | 129 | EIF4G2    | eukaryotic translation initiation factor 4 gamma 2                   | mRNA          |
| chr6  | 31626070  | 31626162  | 20 | + | 140 | PRRC2A    | proline rich coiled-coil 2A                                          | mRNA          |
| chr12 | 57718145  | 57718359  | 20 | + | 215 | OS9       | OS9 endoplasmic reticulum lectin                                     | mRNA          |
| chr14 | 92045580  | 92045702  | 20 | + | 141 |           |                                                                      | no annotation |
| chr12 | 102383317 | 102383376 | 20 | + | 128 |           |                                                                      | no annotation |
| chr5  | 139686663 | 139686753 | 20 | + | 139 |           |                                                                      | no annotation |
| chr14 | 38194203  | 38194235  | 20 | - | 140 |           |                                                                      | no annotation |
| chr19 | 51355315  | 51355371  | 20 | - | 62  | ETFB      | electron transfer flavoprotein subunit beta                          | mRNA          |
| chr8  | 118279150 | 118279214 | 20 | - | 116 | SAMD12    | sterile alpha motif domain containing 12                             | mRNA          |
| chr19 | 15331024  | 15331091  | 20 | - | 134 | BRD4      | bromodomain containing 4                                             | mRNA          |
| chr20 | 44209672  | 44209756  | 20 | - | 134 | OSER1     | oxidative stress responsive serine rich 1                            | mRNA          |
| chr6  | 169649755 | 169649886 | 20 | - | 179 | WDR27     | WD repeat domain 27                                                  | mRNA          |
| chr15 | 85384870  | 85385042  | 20 | + | 179 | AKAP13    | A-kinase anchoring protein 13                                        | mRNA          |
| chr14 | 19302662  | 19302785  | 20 | - | 124 | LINC01296 |                                                                      | lncRNA        |
| chr17 | 72557577  | 72557695  | 20 | - | 150 | LINC00673 |                                                                      | lncRNA        |
| chr2  | 121530887 | 121531010 | 20 | + | 148 | RNU4ATAC  |                                                                      | snRNA         |
| chr8  | 66922473  | 66922551  | 20 | - | 79  | SNORD87   |                                                                      | snoRNA        |
| chr3  | 52690755  | 52690817  | 20 | + | 99  | SNORD19B  |                                                                      | snoRNA        |
| chr1  | 28580380  | 28580513  | 20 | - | 134 | SNORA44   |                                                                      | snoRNA        |
| chr1  | 28579755  | 28579896  | 20 | - | 146 | SNORA61   |                                                                      | snoRNA        |
| chr19 | 11450904  | 11450967  | 20 | + | 64  | PRKCSH    | protein kinase C substrate 80K-H                                     | mRNA          |
| chr1  | 43622436  | 43622508  | 20 | + | 73  | PTPRF     | protein tyrosine phosphatase receptor type F                         | mRNA          |
| chr17 | 44206436  | 44206523  | 20 | - | 88  | UBTF      | upstream binding transcription factor                                | mRNA          |
| chr8  | 56960180  | 56960257  | 20 | - | 93  | IMPAD1    | inositol monophosphatase domain containing 1                         | mRNA          |
| chr12 | 46358290  | 46358385  | 20 | - | 96  | SLC38A2   | solute carrier family 38 member 2                                    | mRNA          |

Supplementary Table S4\_Specific Peaks bound to PURa in CLIP-seq\_PURa vs IgG

|       |           |           |    |   |     |          |                                                                     |        |
|-------|-----------|-----------|----|---|-----|----------|---------------------------------------------------------------------|--------|
| chr1  | 20743271  | 20743353  | 20 | - | 105 | HP1BP3   | heterochromatin protein 1 binding protein 3                         | mRNA   |
| chr1  | 43622376  | 43622434  | 20 | + | 106 | PTPRF    | protein tyrosine phosphatase receptor type F                        | mRNA   |
| chr1  | 234606162 | 234606231 | 20 | - | 112 | IRF2BP2  | interferon regulatory factor 2 binding protein 2                    | mRNA   |
| chr12 | 64695436  | 64695528  | 20 | + | 126 | RASSF3   | Ras association domain family member 3                              | mRNA   |
| chr4  | 39780234  | 39780346  | 20 | + | 126 | UBE2K    | ubiquitin conjugating enzyme E2 K                                   | mRNA   |
| chr14 | 77506036  | 77506162  | 20 | - | 130 | SPTLC2   | serine palmitoyltransferase long chain base subunit 2               | mRNA   |
| chr17 | 40194279  | 40194395  | 20 | + | 132 | RAPGEFL1 | Rap guanine nucleotide exchange factor like 1                       | mRNA   |
| chr19 | 15159633  | 15159740  | 20 | - | 133 | NOTCH3   | notch receptor 3                                                    | mRNA   |
| chr7  | 155309609 | 155309740 | 20 | + | 136 | INSIG1   | insulin induced gene 1                                              | mRNA   |
| chr7  | 88279212  | 88279316  | 20 | - | 152 | STEAP4   | STEAP4 metalloredutase                                              | mRNA   |
| chr1  | 1785995   | 1786044   | 20 | - | 157 | GNB1     | G protein subunit beta 1                                            | mRNA   |
| chr5  | 97032728  | 97032785  | 20 | + | 160 | LNPEP    | leucyl and cystinyl aminopeptidase                                  | mRNA   |
| chr8  | 27598022  | 27598077  | 20 | - | 164 | CLU      | clusterin                                                           | mRNA   |
| chr7  | 44834271  | 44834360  | 20 | - | 172 | H2AZ2    | H2A.Z variant histone 2                                             | mRNA   |
| chr8  | 30678701  | 30678801  | 20 | - | 177 | GSR      | glutathione-disulfide reductase                                     | mRNA   |
| chr6  | 82366370  | 82366478  | 20 | + | 192 | TPBG     | trophoblast glycoprotein                                            | mRNA   |
| chr2  | 26395387  | 26395482  | 20 | + | 198 | SELENOI  | selenoprotein I                                                     | mRNA   |
| chr1  | 207360131 | 207360299 | 20 | + | 298 | CD55     | CD55 molecule                                                       | mRNA   |
| chr3  | 112638173 | 112638250 | 19 | - | 81  | CCDC80   | coiled-coil domain containing 80                                    | mRNA   |
| chr15 | 90476695  | 90476803  | 19 | + | 109 | IQGAP1   | IQ motif containing GTPase activating protein 1                     | mRNA   |
| chr1  | 116384013 | 116384059 | 19 | + | 112 | ATP1A1   | ATPase Na <sup>+</sup> /K <sup>+</sup> transporting subunit alpha 1 | mRNA   |
| chr1  | 116384065 | 116384124 | 19 | + | 112 | ATP1A1   | ATPase Na <sup>+</sup> /K <sup>+</sup> transporting subunit alpha 1 | mRNA   |
| chr2  | 10802498  | 10802623  | 19 | - | 126 | PDIA6    | protein disulfide isomerase family A member 6                       | mRNA   |
| chr8  | 125021777 | 125021900 | 19 | + | 126 | SQLE     | squalene epoxidase                                                  | mRNA   |
| chr1  | 23692608  | 23692759  | 19 | + | 152 | RPL11    | ribosomal protein L11                                               | mRNA   |
| chr11 | 62530347  | 62530410  | 19 | - | 111 | AHNAK    | AHNAK nucleoprotein                                                 | mRNA   |
| chr1  | 1052808   | 1052914   | 19 | + | 122 | AGRN     | agrin                                                               | mRNA   |
| chr12 | 52237862  | 52237915  | 19 | + | 133 | KRT7     | keratin 7                                                           | mRNA   |
| chr19 | 40688178  | 40688245  | 19 | - | 147 | NUMBL    | NUMB like endocytic adaptor protein                                 | mRNA   |
| chrX  | 74265122  | 74265190  | 19 | - | 69  | FTX      |                                                                     | lncRNA |
| chr19 | 12706448  | 12706518  | 19 | - | 71  | SNORD41  |                                                                     | snoRNA |
| chr14 | 20326452  | 20326523  | 19 | - | 75  | SNORD126 |                                                                     | snoRNA |
| chr1  | 173864162 | 173864243 | 19 | - | 93  | SNORD81  |                                                                     | snoRNA |
| chr1  | 155919908 | 155920018 | 19 | - | 131 | SNORA80E |                                                                     | snoRNA |
| chr6  | 159680357 | 159680446 | 19 | - | 90  | SOD2     | superoxide dismutase 2                                              | mRNA   |
| chr14 | 75133322  | 75133412  | 19 | - | 91  | TMED10   | transmembrane p24 trafficking protein 10                            | mRNA   |
| chr1  | 154582305 | 154582357 | 19 | - | 96  | ADAR     | adenosine deaminase RNA specific                                    | mRNA   |
| chr11 | 65854946  | 65855040  | 19 | - | 99  | CFL1     | cofilin 1                                                           | mRNA   |
| chr5  | 97034494  | 97034584  | 19 | + | 100 | LNPEP    | leucyl and cystinyl aminopeptidase                                  | mRNA   |
| chr2  | 54972193  | 54972284  | 19 | - | 105 | RTN4     | reticulon 4                                                         | mRNA   |
| chr11 | 57552125  | 57552233  | 19 | - | 114 | UBE2L6   | ubiquitin conjugating enzyme E2 L6                                  | mRNA   |
| chr16 | 70249596  | 70249673  | 19 | - | 115 | EXOSC6   | exosome component 6                                                 | mRNA   |
| chr5  | 151806330 | 151806420 | 19 | + | 116 | G3BP1    | G3BP stress granule assembly factor 1                               | mRNA   |
| chr10 | 5457879   | 5457996   | 19 | + | 118 | NET1     | neuroepithelial cell transforming 1                                 | mRNA   |
| chr17 | 4959282   | 4959399   | 19 | - | 118 | SPAG7    | sperm associated antigen 7                                          | mRNA   |
| chrX  | 68533030  | 68533094  | 19 | + | 121 | YIPF6    | Yip1 domain family member 6                                         | mRNA   |
| chr1  | 207795031 | 207795147 | 19 | + | 134 | CD46     | CD46 molecule                                                       | mRNA   |
| chr10 | 96522117  | 96522251  | 19 | - | 135 | TM9SF3   | transmembrane 9 superfamily member 3                                | mRNA   |
| chr3  | 128813685 | 128813808 | 19 | + | 137 | RAB7A    | RAB7A, member RAS oncogene family                                   | mRNA   |
| chr1  | 152032537 | 152032673 | 19 | - | 137 | S100A11  | S100 calcium binding protein A11                                    | mRNA   |
| chr17 | 759832    | 759926    | 19 | - | 144 | GLOD4    | glyoxalase domain containing 4                                      | mRNA   |
| chr3  | 14486915  | 14486976  | 19 | + | 146 | SLC6A6   | solute carrier family 6 member 6                                    | mRNA   |
| chr3  | 177025061 | 177025138 | 19 | - | 148 | TBL1XR1  | transducin beta like 1 X-linked receptor 1                          | mRNA   |
| chr3  | 177025164 | 177025205 | 19 | - | 148 | TBL1XR1  | transducin beta like 1 X-linked receptor 1                          | mRNA   |
| chr2  | 9488618   | 9488708   | 19 | - | 149 | IAH1     | isoamyl acetate hydrolyzing esterase 1 (putative)                   | mRNA   |
| chr8  | 142682527 | 142682615 | 19 | + | 150 | PSCA     | prostate stem cell antigen                                          | mRNA   |
| chr8  | 43122941  | 43122982  | 19 | + | 150 | POMK     | protein O-mannose kinase                                            | mRNA   |
| chr17 | 35266313  | 35266466  | 19 | + | 155 | SLFN5    | schlafen family member 5                                            | mRNA   |
| chr9  | 121340174 | 121340235 | 19 | - | 155 | STOM     | stomatatin                                                          | mRNA   |
| chr19 | 42378159  | 42378240  | 19 | + | 164 | MEGF8    | multiple EGF like domains 8                                         | mRNA   |
| chr9  | 123103881 | 123103926 | 19 | + | 166 | RABGAP1  | RAB GTPase activating protein 1                                     | mRNA   |
| chr3  | 49534264  | 49534430  | 19 | + | 167 | DAG1     | dystroglycan 1                                                      | mRNA   |
| chr1  | 167788236 | 167788302 | 19 | + | 171 | MPZL1    | myelin protein zero like 1                                          | mRNA   |
| chr1  | 167788311 | 167788377 | 19 | + | 171 | MPZL1    | myelin protein zero like 1                                          | mRNA   |

Supplementary Table S4\_Specific Peaks bound to PURa in CLIP-seq\_PURa vs IgG

|       |           |           |    |   |     |          |                                                                            |               |
|-------|-----------|-----------|----|---|-----|----------|----------------------------------------------------------------------------|---------------|
| chr2  | 20250342  | 20250390  | 19 | - | 172 | PUM2     | pumilio RNA binding family member 2                                        | mRNA          |
| chr11 | 119664486 | 119664564 | 19 | - | 183 | NECTIN1  | nectin cell adhesion molecule 1                                            | mRNA          |
| chr20 | 32332651  | 32332754  | 19 | + | 200 | KIF3B    | kinesin family member 3B                                                   | mRNA          |
| chr1  | 116988839 | 116988900 | 19 | + | 214 | PTGFRN   | prostaglandin F2 receptor inhibitor                                        | mRNA          |
| chrX  | 147949571 | 147949618 | 19 | + | 216 | FMR1     | FMRP translational regulator 1                                             | mRNA          |
| chr19 | 48197350  | 48197481  | 19 | + | 236 | ZSWIM9   | zinc finger SWIM-type containing 9                                         | mRNA          |
| chr1  | 1055393   | 1055646   | 19 | + | 275 | AGRN     | agrin                                                                      | mRNA          |
| chr4  | 55425375  | 55425469  | 18 | + | 95  | TMEM165  | transmembrane protein 165                                                  | mRNA          |
| chr1  | 39569862  | 39569924  | 18 | - | 63  | PABPC4   | poly(A) binding protein cytoplasmic 4                                      | mRNA          |
| chr11 | 62884456  | 62884525  | 18 | + | 70  | SLC3A2   | solute carrier family 3 member 2                                           | mRNA          |
| chr1  | 244858728 | 244858807 | 18 | - | 80  | HNRNPU   | heterogeneous nuclear ribonucleoprotein U                                  | mRNA          |
| chr1  | 183134723 | 183134809 | 18 | + | 87  | LAMC1    | laminin, gamma 1 (formerly LAMB2)                                          | mRNA          |
| chr4  | 118308437 | 118308542 | 18 | - | 106 | PRSS12   | protease, serine, 12 (neurotrypsin, motopsin)                              | mRNA          |
| chr19 | 38283717  | 38283797  | 18 | + | 109 | SPINT2   | serine peptidase inhibitor, Kunitz type 2                                  | mRNA          |
| chr5  | 141574066 | 141574139 | 18 | - | 109 | DIAPH1   | diaphanous related formin 1                                                | mRNA          |
| chr10 | 32920273  | 32920321  | 18 | - | 113 | ITGB1    | integrin subunit beta 1                                                    | mRNA          |
| chr9  | 87730373  | 87730498  | 18 | + | 126 | CTSL     | cathepsin L                                                                | mRNA          |
| chr1  | 55146997  | 55147034  | 18 | - | 133 | USP24    | ubiquitin specific peptidase 24                                            | mRNA          |
| chr12 | 102383801 | 102383853 | 18 | + | 120 |          |                                                                            | no annotation |
| chr14 | 104858724 | 104858836 | 18 | - | 156 |          |                                                                            | no annotation |
| chr1  | 207767464 | 207767534 | 18 | + | 75  | CD46     | CD46 molecule                                                              | mRNA          |
| chr1  | 103554374 | 103554446 | 18 | + | 94  | RNPC3    | RNA binding region (RNPI, RRM) containing 3                                | mRNA          |
| chr22 | 46382095  | 46382198  | 18 | - | 105 | CELSR1   | cadherin EGF LAG seven-pass G-type receptor 1                              | mRNA          |
| chr2  | 61536942  | 61537039  | 18 | - | 120 | XPO1     | exportin 1                                                                 | mRNA          |
| chr22 | 38488801  | 38488918  | 18 | - | 138 | DDX17    | DEAD-box helicase 17                                                       | mRNA          |
| chr13 | 113215029 | 113215120 | 18 | + | 289 | CUL4A    | cullin 4A                                                                  | mRNA          |
| chr20 | 17962711  | 17962946  | 18 | - | 236 | SNORD17  |                                                                            | snoRNA        |
| chr21 | 8217555   | 8217835   | 18 | + | 295 | RNA18SN2 |                                                                            | rRNA          |
| chr7  | 121349777 | 121349846 | 18 | - | 70  | FAM3C    | family with sequence similarity 3 member C                                 | mRNA          |
| chr18 | 21867869  | 21867924  | 18 | + | 90  | MIB1     | mindbomb E3 ubiquitin protein ligase 1                                     | mRNA          |
| chr19 | 5206129   | 5206164   | 18 | - | 90  | PTPRS    | protein tyrosine phosphatase receptor type S                               | mRNA          |
| chr5  | 80141115  | 80141191  | 18 | - | 90  | SERINC5  | serine incorporator 5                                                      | mRNA          |
| chr19 | 48382957  | 48383050  | 18 | - | 97  | KDELRL1  | KDEL endoplasmic reticulum protein retention receptor 1                    | mRNA          |
| chr19 | 53876312  | 53876406  | 18 | + | 99  | MYADM    | myeloid associated differentiation marker                                  | mRNA          |
| chr1  | 9729917   | 9730018   | 18 | - | 102 | CLSTN1   | calsyntenin 1                                                              | mRNA          |
| chr14 | 69462001  | 69462106  | 18 | + | 106 | SLC39A9  | solute carrier family 39 member 9                                          | mRNA          |
| chr3  | 49534524  | 49534622  | 18 | + | 110 | DAG1     | dystroglycan 1                                                             | mRNA          |
| chr3  | 49534623  | 49534631  | 18 | + | 110 | DAG1     | dystroglycan 1                                                             | mRNA          |
| chr16 | 19118499  | 19118543  | 18 | + | 111 | ITPRIPL2 | inositol 1,4,5-trisphosphate receptor interacting protein-like 2           | mRNA          |
| chr4  | 55425484  | 55425595  | 18 | + | 115 | TMEM165  | transmembrane protein 165                                                  | mRNA          |
| chr10 | 100549793 | 100549881 | 18 | + | 116 | HIF1AN   | hypoxia inducible factor 1 subunit alpha inhibitor                         | mRNA          |
| chr2  | 96185069  | 96185126  | 18 | - | 116 | STARD7   | StAR related lipid transfer domain containing 7                            | mRNA          |
| chr2  | 9584359   | 9584440   | 18 | - | 118 | YWHAQ    | tyrosine 3-monooxygenase/tryptophan 5-monooxygenase activation protein the | mRNA          |
| chr16 | 10529028  | 10529092  | 18 | - | 123 | EMP2     | epithelial membrane protein 2                                              | mRNA          |
| chr7  | 23505078  | 23505163  | 18 | - | 123 | TRA2A    | transformer 2 alpha homolog                                                | mRNA          |
| chr19 | 11133617  | 11133743  | 18 | + | 128 | LDLR     | low density lipoprotein receptor                                           | mRNA          |
| chr1  | 203852437 | 203852565 | 18 | + | 130 | ZC3H11A  | zinc finger CCCH-type containing 11A                                       | mRNA          |
| chr14 | 54427774  | 54427841  | 18 | - | 136 | CNIH1    | cornichon family AMPA receptor auxiliary protein 1                         | mRNA          |
| chr19 | 50310219  | 50310360  | 18 | + | 142 | MYH14    | myosin heavy chain 14                                                      | mRNA          |
| chr1  | 207793646 | 207793793 | 18 | + | 148 | CD46     | CD46 molecule                                                              | mRNA          |
| chr19 | 48923153  | 48923268  | 18 | + | 149 | NUCB1    | nucleobindin 1                                                             | mRNA          |
| chr4  | 56933986  | 56934025  | 18 | + | 150 | REST     | RE1 silencing transcription factor                                         | mRNA          |
| chr9  | 92032289  | 92032412  | 18 | - | 150 | SPTLC1   | serine palmitoyltransferase long chain base subunit 1                      | mRNA          |
| chr12 | 57095800  | 57095943  | 18 | - | 151 | STAT6    | signal transducer and activator of transcription 6                         | mRNA          |
| chr10 | 87753188  | 87753308  | 18 | - | 154 | ATAD1    | ATPase family AAA domain containing 1                                      | mRNA          |
| chr3  | 197043326 | 197043381 | 18 | - | 156 | DLG1     | discs large MAGUK scaffold protein 1                                       | mRNA          |
| chr5  | 6671320   | 6671417   | 18 | + | 197 | SRD5A1   | steroid 5 alpha-reductase 1                                                | mRNA          |
| chr11 | 319740    | 319870    | 17 | - | 276 | IFITM3   | interferon induced transmembrane protein 3                                 | mRNA          |
| chr8  | 144789768 | 144789829 | 17 | - | 99  | RPL8     | ribosomal protein L8                                                       | mRNA          |
| chr8  | 100718245 | 100718280 | 17 | - | 36  | PABPC1   | poly(A) binding protein cytoplasmic 1                                      | mRNA          |
| chr15 | 100905522 | 100905589 | 17 | + | 68  | ALDH1A3  | aldehyde dehydrogenase 1 family member A3                                  | mRNA          |
| chrX  | 53563745  | 53563821  | 17 | - | 77  | HUWE1    | HECT, UBA and WWE domain containing E3 ubiquitin protein ligase 1          | mRNA          |
| chr12 | 52517901  | 52517992  | 17 | - | 97  | KRT5     | keratin 5                                                                  | mRNA          |
| chr17 | 75729287  | 75729390  | 17 | + | 104 | ITGB4    | integrin subunit beta 4                                                    | mRNA          |

Supplementary Table S4\_Specific Peaks bound to PURa in CLIP-seq\_PURa vs IgG

|       |           |           |    |   |     |           |                                                                                   |               |
|-------|-----------|-----------|----|---|-----|-----------|-----------------------------------------------------------------------------------|---------------|
| chr1  | 186326103 | 186326163 | 17 | - | 111 | TPR       | translocated promoter region                                                      | mRNA          |
| chr1  | 186326165 | 186326213 | 17 | - | 111 | TPR       | translocated promoter region                                                      | mRNA          |
| chr3  | 128626732 | 128626832 | 17 | - | 127 | RPN1      | ribophorin I                                                                      | mRNA          |
| chr3  | 112638102 | 112638149 | 17 | - | 133 | CCDC80    | coiled-coil domain containing 80                                                  | mRNA          |
| chr2  | 172469188 | 172469302 | 17 | + | 177 | ITGA6     | integrin subunit alpha 6                                                          | mRNA          |
| chr1  | 43619321  | 43619408  | 17 | + | 200 | PTPRF     | protein tyrosine phosphatase receptor type F                                      | mRNA          |
| chr11 | 83422633  | 83422677  | 17 | - | 68  |           |                                                                                   | no annotation |
| chr13 | 109269750 | 109269835 | 17 | - | 163 |           |                                                                                   | no annotation |
| chr22 | 17026896  | 17026995  | 17 | - | 100 |           |                                                                                   | no annotation |
| chr17 | 59839571  | 59839672  | 17 | + | 117 | VMP1      | vacuole membrane protein 1                                                        | mRNA          |
| chr17 | 17821094  | 17821161  | 17 | - | 129 | SREBF1    | sterol regulatory element binding transcription factor 1                          | mRNA          |
| chr12 | 76068630  | 76068700  | 17 | - | 133 | NAP1L1    | nucleosome assembly protein 1 like 1                                              | mRNA          |
| chr11 | 33140342  | 33140436  | 17 | - | 142 | CSTF3     | cleavage stimulation factor subunit 3                                             | mRNA          |
| chr15 | 100883033 | 100883102 | 17 | + | 153 | ALDH1A3   | aldehyde dehydrogenase 1 family member A3                                         | mRNA          |
| chr9  | 28533     | 28679     | 17 | - | 161 | WASHC1    | WASH complex subunit 1                                                            | mRNA          |
| chr8  | 23568147  | 23568285  | 17 | + | 168 | SLC25A37  | solute carrier family 25 member 37                                                | mRNA          |
| chr8  | 127993071 | 127993141 | 17 | + | 72  | PVT1      |                                                                                   | lncRNA        |
| chr17 | 72557785  | 72557932  | 17 | - | 148 | LINC00673 |                                                                                   | lncRNA        |
| chr19 | 10107662  | 10107724  | 17 | + | 63  | SNORD105  |                                                                                   | snoRNA        |
| chr9  | 33934300  | 33934368  | 17 | - | 69  | SNORD121B |                                                                                   | snoRNA        |
| chr2  | 206161881 | 206161950 | 17 | + | 70  | SNORD51   |                                                                                   | snoRNA        |
| chr16 | 70538031  | 70538100  | 17 | + | 95  | SNORD111  |                                                                                   | snoRNA        |
| chr20 | 62388441  | 62388498  | 17 | + | 58  | RPS21     | ribosomal protein S21                                                             | mRNA          |
| chr4  | 112193795 | 112193855 | 17 | + | 69  | FAM241A   | family with sequence similarity 241 member A                                      | mRNA          |
| chr2  | 177219638 | 177219690 | 17 | + | 75  | HNRNPA3   | heterogeneous nuclear ribonucleoprotein A3                                        | mRNA          |
| chr3  | 133589805 | 133589853 | 17 | + | 84  | CDV3      | CDV3 homolog                                                                      | mRNA          |
| chr3  | 133589854 | 133589888 | 17 | + | 84  | CDV3      | CDV3 homolog                                                                      | mRNA          |
| chr3  | 196051221 | 196051305 | 17 | - | 90  | TFRC      | transferrin receptor                                                              | mRNA          |
| chr19 | 53874967  | 53875059  | 17 | + | 93  | MYADM     | myeloid associated differentiation marker                                         | mRNA          |
| chr15 | 73560811  | 73560913  | 17 | - | 103 | NPTN      | neuroplastin                                                                      | mRNA          |
| chr18 | 672976    | 673078    | 17 | + | 103 | TYMS      | thymidylate synthetase                                                            | mRNA          |
| chr11 | 102398003 | 102398111 | 17 | - | 110 | TMEM123   | transmembrane protein 123                                                         | mRNA          |
| chr5  | 151268044 | 151268154 | 17 | + | 111 | GM2A      | GM2 ganglioside activator                                                         | mRNA          |
| chr8  | 56960045  | 56960160  | 17 | - | 116 | IMPAD1    | inositol monophosphatase domain containing 1                                      | mRNA          |
| chr3  | 105575799 | 105575890 | 17 | + | 117 | ALCAM     | activated leukocyte cell adhesion molecule                                        | mRNA          |
| chr3  | 13316252  | 13316358  | 17 | - | 119 | NUP210    | nucleoporin 210                                                                   | mRNA          |
| chr11 | 62888644  | 62888762  | 17 | + | 119 | SLC3A2    | solute carrier family 3 member 2                                                  | mRNA          |
| chr15 | 98964366  | 98964466  | 17 | + | 127 | IGF1R     | insulin like growth factor 1 receptor                                             | mRNA          |
| chr11 | 111294744 | 111294793 | 17 | - | 138 | COLCA1    | colorectal cancer associated 1                                                    | mRNA          |
| chr11 | 33708900  | 33709038  | 17 | - | 139 | CD59      | CD59 molecule                                                                     | mRNA          |
| chr1  | 53246343  | 53246478  | 17 | - | 142 | LRP8      | LDL receptor related protein 8                                                    | mRNA          |
| chr3  | 47852093  | 47852236  | 17 | - | 144 | MAP4      | microtubule associated protein 4                                                  | mRNA          |
| chr6  | 115939044 | 115939120 | 17 | - | 160 | FRK       | fyn-related Src family tyrosine kinase                                            | mRNA          |
| chr2  | 177222334 | 177222427 | 17 | + | 160 | HNRNPA3   | heterogeneous nuclear ribonucleoprotein A3                                        | mRNA          |
| chr5  | 97036288  | 97036411  | 17 | + | 161 | LNPEP     | leucyl and cystinyl aminopeptidase                                                | mRNA          |
| chr6  | 160105775 | 160105852 | 17 | + | 165 | IGF2R     | insulin like growth factor 2 receptor                                             | mRNA          |
| chr6  | 42103077  | 42103240  | 17 | - | 166 | C6orf132  | chromosome 6 open reading frame 132                                               | mRNA          |
| chr9  | 83969217  | 83969396  | 17 | - | 180 | HNRNPK    | heterogeneous nuclear ribonucleoprotein K                                         | mRNA          |
| chr19 | 38730173  | 38730323  | 17 | + | 185 | ACTN4     | actinin alpha 4                                                                   | mRNA          |
| chr6  | 43181267  | 43181298  | 17 | + | 190 | SRF       | serum response factor (c-fos serum response element-binding transcription factor) | mRNA          |
| chr6  | 34245810  | 34245957  | 17 | + | 208 | HMGA1     | high mobility group AT-hook 1                                                     | mRNA          |
| chr1  | 28147534  | 28147669  | 17 | - | 213 | PTAFR     | platelet activating factor receptor                                               | mRNA          |
| chr22 | 41663803  | 41664038  | 17 | + | 242 | XRCC6     | X-ray repair cross complementing 6                                                | mRNA          |
| chr6  | 31817748  | 31817837  | 17 | + | 242 | HSPA1A    | heat shock 70kDa protein 1A                                                       | mRNA          |
| chr9  | 105385421 | 105385452 | 16 | + | 82  | SLC44A1   | solute carrier family 44 member 1                                                 | mRNA          |
| chr12 | 53297849  | 53297924  | 16 | + | 83  | PFDN5     | prefoldin subunit 5                                                               | mRNA          |
| chr11 | 34076559  | 34076642  | 16 | + | 84  | CAPRN1    | cell cycle associated protein 1                                                   | mRNA          |
| chr1  | 183118084 | 183118146 | 16 | + | 97  | LAMC1     | laminin, gamma 1 (formerly LAMB2)                                                 | mRNA          |
| chr8  | 124543086 | 124543194 | 16 | + | 109 | NDUFB9    | NADH:ubiquinone oxidoreductase subunit B9                                         | mRNA          |
| chr2  | 74369423  | 74369491  | 16 | - | 109 | DCTN1     | dynactin subunit 1                                                                | mRNA          |
| chr3  | 41224525  | 41224650  | 16 | + | 126 | CTNNB1    | catenin beta 1                                                                    | mRNA          |
| chr3  | 25633924  | 25633994  | 16 | - | 134 | TOP2B     | DNA topoisomerase II beta                                                         | mRNA          |
| chr1  | 23694659  | 23694796  | 16 | + | 138 | RPL11     | ribosomal protein L11                                                             | mRNA          |
| chr6  | 158783540 | 158783589 | 16 | - | 139 | EZR       | eZRin                                                                             | mRNA          |



Supplementary Table S4\_Specific Peaks bound to PURa in CLIP-seq\_PURa vs IgG

|       |           |           |    |   |     |             |                                                                              |        |
|-------|-----------|-----------|----|---|-----|-------------|------------------------------------------------------------------------------|--------|
| chr5  | 136049490 | 136049580 | 16 | + | 151 | TGFB1       | transforming growth factor beta induced                                      | mRNA   |
| chr1  | 81907083  | 81907214  | 16 | + | 153 | ADGRL2      | adhesion G protein-coupled receptor L2                                       | mRNA   |
| chr3  | 49122162  | 49122346  | 16 | - | 231 | LAMB2       | laminin subunit beta 2                                                       | mRNA   |
| chr14 | 21263058  | 21263128  | 16 | - | 83  | HNRNPC      | heterogeneous nuclear ribonucleoprotein C                                    | mRNA   |
| chr20 | 5588878   | 5588925   | 16 | - | 84  | GPCPD1      | glycerophosphocholine phosphodiesterase 1                                    | mRNA   |
| chr3  | 42627549  | 42627601  | 16 | + | 86  | NKTR        | natural killer cell triggering receptor                                      | mRNA   |
| chr17 | 50751847  | 50751913  | 16 | + | 93  | LUC7L3      | LUC7 like 3 pre-mRNA splicing factor                                         | mRNA   |
| chr7  | 23530197  | 23530264  | 16 | - | 99  | TRA2A       | transformer 2 alpha homolog                                                  | mRNA   |
| chr20 | 34072860  | 34072924  | 16 | + | 127 | RALY        | RALY heterogeneous nuclear ribonucleoprotein                                 | mRNA   |
| chr19 | 49102838  | 49102965  | 16 | + | 128 | SNRNP70     | small nuclear ribonucleoprotein U1 subunit 70                                | mRNA   |
| chr17 | 17820892  | 17820943  | 16 | - | 165 | SREBF1      | sterol regulatory element binding transcription factor 1                     | mRNA   |
| chr8  | 127480294 | 127480339 | 16 | + | 126 | CASC8       |                                                                              | lncRNA |
| chr19 | 12703597  | 12703669  | 16 | - | 73  | SNORD135    |                                                                              | snoRNA |
| chr20 | 2656639   | 2656695   | 16 | + | 73  | SNORD56     |                                                                              | snoRNA |
| chr1  | 155925957 | 155926023 | 16 | - | 67  | SCARNA4     |                                                                              | scaRNA |
| chr21 | 8392665   | 8392834   | 16 | + | 170 | RNA45SN3    |                                                                              | rRNA   |
| chr4  | 14473600  | 14473687  | 16 | + | 95  | LINC00504   |                                                                              | lncRNA |
| chr14 | 55684098  | 55684150  | 16 | + | 53  | KTN1        | kinectin 1                                                                   | mRNA   |
| chr11 | 75405603  | 75405667  | 16 | + | 65  | RPS3        | ribosomal protein S3                                                         | mRNA   |
| chr5  | 1461612   | 1461681   | 16 | - | 70  | LPCAT1      | lysophosphatidylcholine acyltransferase 1                                    | mRNA   |
| chr3  | 196049296 | 196049366 | 16 | - | 76  | TFRC        | transferrin receptor                                                         | mRNA   |
| chr5  | 95888068  | 95888151  | 16 | - | 86  | ELL2        | elongation factor for RNA polymerase II 2                                    | mRNA   |
| chr7  | 73832659  | 73832690  | 16 | + | 87  | CLDN4       | claudin 4                                                                    | mRNA   |
| chr14 | 49583589  | 49583675  | 16 | - | 87  | RPS29       | ribosomal protein S29                                                        | mRNA   |
| chr1  | 119914385 | 119914460 | 16 | - | 88  | NOTCH2      | notch receptor 2                                                             | mRNA   |
| chr1  | 46677044  | 46677132  | 16 | - | 95  | EFCAB14     | EF-hand calcium binding domain 14                                            | mRNA   |
| chr1  | 202015800 | 202015845 | 16 | + | 98  | ELF3        | E74 like ETS transcription factor 3                                          | mRNA   |
| chr16 | 10530199  | 10530293  | 16 | - | 98  | EMP2        | epithelial membrane protein 2                                                | mRNA   |
| chr20 | 32850065  | 32850140  | 16 | + | 101 | MAPRE1      | microtubule-associated protein, RP/EB family, member 1                       | mRNA   |
| chr11 | 47468271  | 47468333  | 16 | - | 101 | CELF1       | CUGBP Elav-like family member 1                                              | mRNA   |
| chr5  | 95795777  | 95795874  | 16 | + | 102 | RHOBTB3     | Rho related BTB domain containing 3                                          | mRNA   |
| chr5  | 159157601 | 159157648 | 16 | - | 103 | RNF145      | ring finger protein 145                                                      | mRNA   |
| chr14 | 70370791  | 70370876  | 16 | - | 104 | SYNJ2BP-COX | SYNJ2BP-COX16 readthrough                                                    | mRNA   |
| chr2  | 212999914 | 212999997 | 16 | - | 107 | IKZF2       | IKAROS family zinc finger 2                                                  | mRNA   |
| chr6  | 137197855 | 137197934 | 16 | - | 109 | IFNGR1      | interferon gamma receptor 1                                                  | mRNA   |
| chr3  | 64002437  | 64002549  | 16 | + | 113 | ATXN7       | ataxin 7                                                                     | mRNA   |
| chr20 | 64275257  | 64275343  | 16 | + | 115 | PCMTD2      | protein-L-isoaspartate (D-aspartate) O-methyltransferase domain containing 2 | mRNA   |
| chr16 | 84975548  | 84975648  | 16 | - | 117 | ZDHHC7      | zinc finger DHHC-type containing 7                                           | mRNA   |
| chr8  | 37754977  | 37755093  | 16 | + | 117 | ERLIN2      | ER lipid raft associated 2                                                   | mRNA   |
| chr14 | 95190864  | 95190908  | 16 | - | 118 | CLMN        | calmin                                                                       | mRNA   |
| chr17 | 29256974  | 29257050  | 16 | - | 120 | NUFIP2      | nuclear FMR1 interacting protein 2                                           | mRNA   |
| chr19 | 54193531  | 54193599  | 16 | + | 120 | TSEN34      | tRNA splicing endonuclease subunit 34                                        | mRNA   |
| chr9  | 113261807 | 113261894 | 16 | + | 122 | SLC31A1     | solute carrier family 31 (copper transporter), member 1                      | mRNA   |
| chr3  | 141925657 | 141925778 | 16 | + | 122 | ATP1B3      | ATPase Na <sup>+</sup> /K <sup>+</sup> transporting subunit beta 3           | mRNA   |
| chr14 | 63685849  | 63685954  | 16 | - | 124 | SGPP1       | sphingosine-1-phosphate phosphatase 1                                        | mRNA   |
| chr3  | 160501844 | 160501963 | 16 | - | 126 | KPNA4       | karyopherin subunit alpha 4                                                  | mRNA   |
| chr1  | 156465525 | 156465650 | 16 | - | 126 | MEF2D       | myocyte enhancer factor 2D                                                   | mRNA   |
| chr12 | 909853    | 909979    | 16 | + | 127 | WNK1        | WNK lysine deficient protein kinase 1                                        | mRNA   |
| chr2  | 222943113 | 222943188 | 16 | + | 130 | ACSL3       | acyl-CoA synthetase long chain family member 3                               | mRNA   |
| chr2  | 230820520 | 230820620 | 16 | + | 135 | CAB39       | calcium binding protein 39                                                   | mRNA   |
| chr1  | 162529161 | 162529232 | 16 | + | 149 | UHMK1       | U2AF homology motif kinase 1                                                 | mRNA   |
| chr1  | 154582094 | 154582153 | 16 | - | 151 | ADAR        | adenosine deaminase RNA specific                                             | mRNA   |
| chr1  | 92390038  | 92390126  | 16 | - | 158 | RPAP2       | RNA polymerase II associated protein 2                                       | mRNA   |
| chr17 | 57680437  | 57680528  | 16 | + | 194 | MSI2        | musashi RNA binding protein 2                                                | mRNA   |
| chr1  | 207359712 | 207359930 | 16 | + | 219 | CD55        | CD55 molecule                                                                | mRNA   |
| chrX  | 153696005 | 153696160 | 16 | + | 224 | SLC6A8      | solute carrier family 6 member 8                                             | mRNA   |
| chr21 | 25880867  | 25880908  | 16 | - | 231 | APP         | amyloid beta precursor protein                                               | mRNA   |
| chr8  | 99887539  | 99887618  | 15 | - | 121 | COX6C       | cytochrome c oxidase subunit 6C                                              | mRNA   |
| chr10 | 96527212  | 96527267  | 15 | - | 56  | TM9SF3      | transmembrane 9 superfamily member 3                                         | mRNA   |
| chr10 | 96552927  | 96552991  | 15 | - | 65  | TM9SF3      | transmembrane 9 superfamily member 3                                         | mRNA   |
| chr14 | 55637276  | 55637348  | 15 | + | 73  | KTN1        | kinectin 1                                                                   | mRNA   |
| chr14 | 55648033  | 55648115  | 15 | + | 83  | KTN1        | kinectin 1                                                                   | mRNA   |
| chr3  | 121717032 | 121717099 | 15 | - | 99  | GOLGB1      | golgin B1                                                                    | mRNA   |
| chr12 | 6236191   | 6236275   | 15 | + | 102 | CD9         | CD9 molecule                                                                 | mRNA   |

Supplementary Table S4\_Specific Peaks bound to PURa in CLIP-seq\_PURa vs IgG

|       |           |           |    |   |     |            |                                                                              |               |
|-------|-----------|-----------|----|---|-----|------------|------------------------------------------------------------------------------|---------------|
| chr1  | 119966375 | 119966482 | 15 | - | 108 | NOTCH2     | notch receptor 2                                                             | mRNA          |
| chr18 | 46091708  | 46091816  | 15 | - | 109 | ATP5F1A    | ATP synthase F1 subunit alpha                                                | mRNA          |
| chr22 | 50280905  | 50280973  | 15 | - | 109 | PLXNB2     | plexin B2                                                                    | mRNA          |
| chr5  | 141579116 | 141579196 | 15 | - | 110 | DIAPH1     | diaphanous related formin 1                                                  | mRNA          |
| chr2  | 241256288 | 241256335 | 15 | - | 115 | HDLBP      | high density lipoprotein binding protein                                     | mRNA          |
| chr1  | 1053841   | 1053894   | 15 | + | 146 | AGRN       | agrin                                                                        | mRNA          |
| chr17 | 63766027  | 63766045  | 15 | - | 149 | CCDC47     | coiled-coil domain containing 47                                             | mRNA          |
| chr19 | 38721537  | 38721688  | 15 | + | 152 | ACTN4      | actinin alpha 4                                                              | mRNA          |
| chr3  | 49968148  | 49968224  | 15 | + | 187 | RBM6       | RNA binding motif protein 6                                                  | mRNA          |
| chr12 | 6943829   | 6943878   | 15 | + | 63  | C12orf57   |                                                                              | lncRNA        |
| chr8  | 124999328 | 124999361 | 15 | + | 119 | SQLE       | squalene epoxidase                                                           | mRNA          |
| chr12 | 102311632 | 102311715 | 15 | + | 87  |            |                                                                              | no annotation |
| chr22 | 17026779  | 17026824  | 15 | - | 89  |            |                                                                              | no annotation |
| chr16 | 90221565  | 90221698  | 15 | + | 134 |            |                                                                              | no annotation |
| chr1  | 77745527  | 77745577  | 15 | + | 56  | USP33      | ubiquitin specific peptidase 33                                              | mRNA          |
| chr4  | 158987520 | 158987569 | 15 | - | 59  | C4orf45    | chromosome 4 open reading frame 45                                           | mRNA          |
| chr1  | 146074581 | 146074636 | 15 | - | 59  | NBPF10     | NBPF member 10                                                               | mRNA          |
| chr8  | 30414271  | 30414315  | 15 | + | 60  | RBPMS      | RNA binding protein, mRNA processing factor                                  | mRNA          |
| chr17 | 59839295  | 59839388  | 15 | + | 110 | VMP1       | vacuole membrane protein 1                                                   | mRNA          |
| chr1  | 234407990 | 234408035 | 15 | - | 111 | TARBP1     | TAR (HIV-1) RNA binding protein 1                                            | mRNA          |
| chr18 | 37075114  | 37075177  | 15 | - | 123 | KIAA1328   | KIAA1328                                                                     | mRNA          |
| chr5  | 171406571 | 171406641 | 15 | + | 148 | NPM1       | nucleophosmin 1                                                              | mRNA          |
| chr8  | 51839122  | 51839170  | 15 | - | 152 | PCMTD1     | protein-L-isoaspartate (D-aspartate) O-methyltransferase domain containing 1 | mRNA          |
| chr19 | 36214134  | 36214146  | 15 | - | 181 | ZNF565     | zinc finger protein 565                                                      | mRNA          |
| chr19 | 36214283  | 36214314  | 15 | - | 181 | ZNF565     | zinc finger protein 565                                                      | mRNA          |
| chr8  | 70646339  | 70646410  | 15 | - | 99  | LACTB2-AS1 |                                                                              | lncRNA        |
| chr3  | 52688892  | 52688951  | 15 | + | 63  | SNORD136   |                                                                              | snoRNA        |
| chr2  | 202278115 | 202278191 | 15 | + | 78  | SNORD70B   |                                                                              | snoRNA        |
| chr17 | 7576885   | 7576962   | 15 | + | 103 | SNORD10    |                                                                              | snoRNA        |
| chr11 | 46762375  | 46762420  | 15 | - | 123 | SNORD67    |                                                                              | snoRNA        |
| chr11 | 811688    | 811814    | 15 | + | 149 | SNORA52    |                                                                              | snoRNA        |
| chr3  | 845583    | 845620    | 15 | - | 61  | LINC01266  |                                                                              | lncRNA        |
| chr1  | 93338779  | 93338843  | 15 | - | 134 | CCDC18-AS1 |                                                                              | lncRNA        |
| chr8  | 125022234 | 125022280 | 15 | + | 51  | SQLE       | squalene epoxidase                                                           | mRNA          |
| chr20 | 51598218  | 51598266  | 15 | - | 56  | ATP9A      | ATPase phospholipid transporting 9A                                          | mRNA          |
| chr1  | 154979119 | 154979174 | 15 | + | 60  | CKS1B      | CDC28 protein kinase regulatory subunit 1B                                   | mRNA          |
| chr12 | 6238009   | 6238057   | 15 | + | 61  | CD9        | CD9 molecule                                                                 | mRNA          |
| chr12 | 123597683 | 123597731 | 15 | + | 61  | TMED2      | transmembrane p24 trafficking protein 2                                      | mRNA          |
| chr12 | 13216629  | 13216689  | 15 | + | 61  | EMP1       | epithelial membrane protein 1                                                | mRNA          |
| chr1  | 154584489 | 154584544 | 15 | - | 64  | ADAR       | adenosine deaminase RNA specific                                             | mRNA          |
| chr2  | 85321521  | 85321587  | 15 | - | 73  | TGOLN2     | trans-golgi network protein 2                                                | mRNA          |
| chr8  | 61624730  | 61624802  | 15 | - | 73  | ASPH       | aspartate beta-hydroxylase                                                   | mRNA          |
| chr2  | 8858183   | 8858256   | 15 | - | 74  | MBOAT2     | membrane bound O-acyltransferase domain containing 2                         | mRNA          |
| chr1  | 171593292 | 171593371 | 15 | + | 80  | PRRC2C     | proline rich coiled-coil 2C                                                  | mRNA          |
| chr1  | 169131611 | 169131679 | 15 | + | 82  | ATP1B1     | ATPase Na+/K+ transporting subunit beta 1                                    | mRNA          |
| chr9  | 86027611  | 86027653  | 15 | - | 84  | GOLM1      | golgi membrane protein 1                                                     | mRNA          |
| chr3  | 49533574  | 49533641  | 15 | + | 86  | DAG1       | dystroglycan 1                                                               | mRNA          |
| chr12 | 8941137   | 8941213   | 15 | - | 90  | M6PR       | mannose-6-phosphate receptor                                                 | mRNA          |
| chr1  | 42926291  | 42926380  | 15 | - | 91  | SLC2A1     | solute carrier family 2 member 1                                             | mRNA          |
| chr6  | 109367810 | 109367898 | 15 | - | 93  | CD164      | CD164 molecule                                                               | mRNA          |
| chr8  | 100919778 | 100919871 | 15 | - | 94  | YWHAZ      | tyrosine 3-monooxygenase/tryptophan 5-monooxygenase activation protein zeta  | mRNA          |
| chr11 | 95131275  | 95131372  | 15 | + | 99  | ENDOD1     | endonuclease domain containing 1                                             | mRNA          |
| chr12 | 95658318  | 95658419  | 15 | - | 102 | NTN4       | netrin 4                                                                     | mRNA          |
| chr20 | 47655646  | 47655753  | 15 | + | 108 | NCOA3      | nuclear receptor coactivator 3                                               | mRNA          |
| chr16 | 15413126  | 15413227  | 15 | - | 113 | MPV17L     | MPV17 mitochondrial membrane protein-like                                    | mRNA          |
| chr15 | 40872540  | 40872666  | 15 | - | 127 | RHOV       | ras homolog family member V                                                  | mRNA          |
| chr6  | 158632372 | 158632489 | 15 | + | 130 | TMEM181    | transmembrane protein 181                                                    | mRNA          |
| chr15 | 89197333  | 89197460  | 15 | + | 131 | ABHD2      | abhydrolase domain containing 2                                              | mRNA          |
| chr3  | 196348478 | 196348595 | 15 | - | 131 | UBXN7      | UBX domain protein 7                                                         | mRNA          |
| chr3  | 107807884 | 107807937 | 15 | + | 136 | BBX        | BBX high mobility group box domain containing                                | mRNA          |
| chr2  | 227559186 | 227559225 | 15 | + | 140 | AGFG1      | ArfGAP with FG repeats 1                                                     | mRNA          |
| chr9  | 105390049 | 105390189 | 15 | + | 141 | SLC44A1    | solute carrier family 44 member 1                                            | mRNA          |
| chr12 | 53040477  | 53040628  | 15 | + | 152 | EIF4B      | eukaryotic translation initiation factor 4B                                  | mRNA          |
| chr18 | 9400393   | 9400561   | 15 | + | 169 | TWSG1      | twisted gastrulation BMP signaling modulator 1                               | mRNA          |

Supplementary Table S4\_Specific Peaks bound to PURa in CLIP-seq\_PURa vs IgG

|       |           |           |    |   |     |           |                                                                   |               |
|-------|-----------|-----------|----|---|-----|-----------|-------------------------------------------------------------------|---------------|
| chr7  | 90414389  | 90414573  | 15 | + | 187 | CLDN12    | claudin 12                                                        | mRNA          |
| chr2  | 208236513 | 208236704 | 15 | - | 201 | IDH1      | isocitrate dehydrogenase (NADP(+)) 1                              | mRNA          |
| chr16 | 71928745  | 71928803  | 15 | + | 221 | IST1      | IST1 factor associated with ESCRT-III                             | mRNA          |
| chr16 | 56362420  | 56362506  | 15 | - | 239 | AMFR      | autocrine motility factor receptor                                | mRNA          |
| chr16 | 85801204  | 85801278  | 14 | + | 75  | COX4I1    | cytochrome c oxidase subunit 4I1                                  | mRNA          |
| chr17 | 50750502  | 50750574  | 14 | + | 193 | LUC7L3    | LUC7 like 3 pre-mRNA splicing factor                              | mRNA          |
| chr17 | 38850123  | 38850214  | 14 | - | 92  | RPL23     | ribosomal protein L23                                             | mRNA          |
| chr10 | 96551371  | 96551411  | 14 | - | 41  | TM9SF3    | transmembrane 9 superfamily member 3                              | mRNA          |
| chr3  | 194430272 | 194430315 | 14 | - | 44  | ATP13A3   | ATPase 13A3                                                       | mRNA          |
| chr2  | 218238792 | 218238850 | 14 | + | 59  | ARPC2     | actin related protein 2/3 complex subunit 2                       | mRNA          |
| chr12 | 52518102  | 52518161  | 14 | - | 60  | KRT5      | keratin 5                                                         | mRNA          |
| chr2  | 222930749 | 222930805 | 14 | + | 63  | ACSL3     | acyl-CoA synthetase long chain family member 3                    | mRNA          |
| chr9  | 98015363  | 98015426  | 14 | + | 64  | ANP32B    | acidic (leucine-rich) nuclear phosphoprotein 32 family, member B  | mRNA          |
| chr8  | 125007423 | 125007487 | 14 | + | 65  | SQLE      | squalene epoxidase                                                | mRNA          |
| chr2  | 182736248 | 182736320 | 14 | + | 73  | DNAJC10   | DnaJ heat shock protein family (Hsp40) member C10                 | mRNA          |
| chr5  | 135346009 | 135346057 | 14 | - | 76  | MACROH2A1 | macroH2A.1 histone                                                | mRNA          |
| chrX  | 53562142  | 53562192  | 14 | - | 83  | HUWE1     | HECT, UBA and WWE domain containing E3 ubiquitin protein ligase 1 | mRNA          |
| chr3  | 31625992  | 31626074  | 14 | + | 83  | STT3B     | STT3 oligosaccharyltransferase complex catalytic subunit B        | mRNA          |
| chr6  | 31626771  | 31626862  | 14 | + | 92  | PRRC2A    | proline rich coiled-coil 2A                                       | mRNA          |
| chr15 | 98942922  | 98943021  | 14 | + | 100 | IGF1R     | insulin like growth factor 1 receptor                             | mRNA          |
| chr3  | 53229006  | 53229107  | 14 | - | 102 | TKT       | transketolase                                                     | mRNA          |
| chr1  | 119969578 | 119969687 | 14 | - | 110 | NOTCH2    | notch receptor 2                                                  | mRNA          |
| chr10 | 93369649  | 93369763  | 14 | - | 115 | MYOF      | myoferlin                                                         | mRNA          |
| chr5  | 141576755 | 141576817 | 14 | - | 117 | DIAPH1    | diaphanous related formin 1                                       | mRNA          |
| chr11 | 88309202  | 88309276  | 14 | - | 119 | CTSC      | cathepsin C                                                       | mRNA          |
| chr12 | 21637070  | 21637194  | 14 | - | 125 | LDHB      | lactate dehydrogenase B                                           | mRNA          |
| chr11 | 1761323   | 1761468   | 14 | - | 146 | CTSD      | cathepsin D                                                       | mRNA          |
| chr18 | 743259    | 743285    | 14 | - | 157 | YES1      | YES proto-oncogene 1                                              | mRNA          |
| chr1  | 156320864 | 156321025 | 14 | - | 162 | CCT3      | chaperonin containing TCP1 subunit 3                              | mRNA          |
| chr3  | 9249370   | 9249449   | 14 | - | 144 | SRGAP3    | SLIT-ROBO Rho GTPase activating protein 3                         | mRNA          |
| chr8  | 124999365 | 124999482 | 14 | + | 118 | SQLE      | squalene epoxidase                                                | mRNA          |
| chr4  | 25200598  | 25200715  | 14 | - | 118 |           |                                                                   | no annotation |
| chr15 | 38851833  | 38851908  | 14 | + | 122 |           |                                                                   | no annotation |
| chr8  | 11807158  | 11807199  | 14 | + | 45  | FDFT1     | farnesyl-diphosphate farnesyltransferase 1                        | mRNA          |
| chr15 | 100912467 | 100912519 | 14 | + | 53  | ALDH1A3   | aldehyde dehydrogenase 1 family member A3                         | mRNA          |
| chr1  | 86350440  | 86350485  | 14 | + | 68  | ODF2L     | outer dense fiber of sperm tails 2 like                           | mRNA          |
| chr5  | 17222728  | 17222802  | 14 | + | 75  | BASP1     | brain abundant, membrane attached signal protein 1                | mRNA          |
| chr17 | 46938853  | 46938923  | 14 | + | 79  | GOSR2     | golgi SNAP receptor complex member 2                              | mRNA          |
| chr2  | 121479747 | 121479785 | 14 | - | 81  | CLASP1    | cytoplasmic linker associated protein 1                           | mRNA          |
| chr1  | 207769520 | 207769610 | 14 | + | 91  | CD46      |                                                                   | mRNA          |
| chr1  | 70223407  | 70223501  | 14 | + | 96  | SRSF11    | serine and arginine rich splicing factor 11                       | mRNA          |
| chr8  | 42534637  | 42534670  | 14 | - | 97  | SLC20A2   | solute carrier family 20 member 2                                 | mRNA          |
| chr16 | 81626446  | 81626548  | 14 | + | 103 | CMIP      | c-Maf inducing protein                                            | mRNA          |
| chr2  | 197419895 | 197419927 | 14 | - | 105 | SF3B1     | splicing factor 3b subunit 1                                      | mRNA          |
| chr13 | 110899432 | 110899486 | 14 | - | 106 | ANKRD10   | ankyrin repeat domain 10                                          | mRNA          |
| chr16 | 87738382  | 87738462  | 14 | - | 116 | KLHDC4    | kelch domain containing 4                                         | mRNA          |
| chr19 | 36213986  | 36214110  | 14 | - | 125 | ZNF565    | zinc finger protein 565                                           | mRNA          |
| chr6  | 142934904 | 142935012 | 14 | - | 126 | HIVEP2    | HIVEP zinc finger 2                                               | mRNA          |
| chr5  | 32441433  | 32441499  | 14 | - | 140 | ZFR       | zinc finger RNA binding protein                                   | mRNA          |
| chr10 | 68755171  | 68755239  | 14 | + | 69  | SNORD98   |                                                                   | snoRNA        |
| chr16 | 71758401  | 71758482  | 14 | - | 82  | SNORD71   |                                                                   | snoRNA        |
| chr14 | 103337844 | 103337937 | 14 | + | 132 | SNORA28   |                                                                   | snoRNA        |
| chr17 | 7574776   | 7574847   | 14 | + | 136 | SNORA48   |                                                                   | snoRNA        |
| chr21 | 45602624  | 45602696  | 14 | + | 74  | LINC01694 |                                                                   | lncRNA        |
| chr3  | 128620228 | 128620289 | 14 | - | 62  | RPN1      | ribophorin 1                                                      | mRNA          |
| chr1  | 159918550 | 159918616 | 14 | - | 67  | TAGLN2    | transgelin 2                                                      | mRNA          |
| chr12 | 13216525  | 13216594  | 14 | + | 70  | EMP1      | epithelial membrane protein 1                                     | mRNA          |
| chr11 | 110231533 | 110231580 | 14 | - | 71  | RDX       | radixin, transcript variant 4                                     | mRNA          |
| chr1  | 32365343  | 32365411  | 14 | - | 71  | BSDC1     | BSD domain containing 1                                           | mRNA          |
| chr2  | 112117306 | 112117366 | 14 | + | 76  | TMEM87B   | transmembrane protein 87B                                         | mRNA          |
| chr10 | 119168246 | 119168312 | 14 | - | 77  | PRDX3     | peroxiredoxin 3                                                   | mRNA          |
| chr20 | 33854167  | 33854216  | 14 | + | 78  | CHMP4B    | charged multivesicular body protein 4B                            | mRNA          |
| chr10 | 72011415  | 72011492  | 14 | + | 78  | CHST3     | carbohydrate (chondroitin 6) sulfotransferase 3                   | mRNA          |
| chr12 | 909981    | 910059    | 14 | + | 79  | WNK1      | WNK lysine deficient protein kinase 1                             | mRNA          |

Supplementary Table S4\_Specific Peaks bound to PURa in CLIP-seq\_PURa vs IgG

|       |           |           |    |   |     |           |                                                                             |               |
|-------|-----------|-----------|----|---|-----|-----------|-----------------------------------------------------------------------------|---------------|
| chr5  | 6670993   | 6671071   | 14 | + | 79  | SRD5A1    | steroid 5 alpha-reductase 1                                                 | mRNA          |
| chr19 | 42377408  | 42377490  | 14 | + | 83  | MEGF8     | multiple EGF like domains 8                                                 | mRNA          |
| chr3  | 128070778 | 128070862 | 14 | + | 85  | SEC61A1   | SEC61 translocon alpha 1 subunit                                            | mRNA          |
| chr20 | 51599551  | 51599617  | 14 | - | 86  | ATP9A     | ATPase phospholipid transporting 9A                                         | mRNA          |
| chr9  | 112221333 | 112221408 | 14 | - | 92  | PTBP3     | polypyrimidine tract binding protein 3                                      | mRNA          |
| chr17 | 50090385  | 50090479  | 14 | + | 97  | ITGA3     | integrin subunit alpha 3                                                    | mRNA          |
| chr5  | 10435408  | 10435473  | 14 | + | 100 | MARCHF6   | membrane associated ring-CH-type finger 6                                   | mRNA          |
| chr18 | 63598498  | 63598551  | 14 | + | 100 | SERPINB13 | serpin family B member 13                                                   | mRNA          |
| chr3  | 33144209  | 33144308  | 14 | + | 100 | CRTAP     | cartilage associated protein                                                | mRNA          |
| chr3  | 182942706 | 182942775 | 14 | - | 102 | DCUN1D1   | defective in cullin neddylation 1 domain containing 1                       | mRNA          |
| chr2  | 175073457 | 175073559 | 14 | - | 103 | SF3B1     | splicing factor 3b subunit 1                                                | mRNA          |
| chrX  | 103358303 | 103358366 | 14 | + | 106 | TCEAL9    | transcription elongation factor A like 9                                    | mRNA          |
| chr19 | 45609519  | 45609569  | 14 | - | 107 | EML2      | EMAP like 2                                                                 | mRNA          |
| chr1  | 171593138 | 171593201 | 14 | + | 107 | PRRC2C    | proline rich coiled-coil 2C                                                 | mRNA          |
| chr14 | 24308094  | 24308182  | 14 | + | 114 | NOP9      | NOP9 nucleolar protein                                                      | mRNA          |
| chr6  | 42101268  | 42101373  | 14 | - | 118 | C6orf132  | chromosome 6 open reading frame 132                                         | mRNA          |
| chr5  | 10264741  | 10264853  | 14 | + | 118 | CCT5      | chaperonin containing TCP1 subunit 5                                        | mRNA          |
| chr2  | 197503263 | 197503342 | 14 | + | 120 | HSPE1     | heat shock protein family E                                                 | mRNA          |
| chr1  | 116987617 | 116987665 | 14 | + | 122 | PTGFRN    | prostaglandin F2 receptor inhibitor                                         | mRNA          |
| chr6  | 31829874  | 31829979  | 14 | + | 122 | HSPA1B    | heat shock 70kDa protein 1B                                                 | mRNA          |
| chr2  | 168770330 | 168770394 | 14 | + | 136 | CERS6     | ceramide synthase 6                                                         | mRNA          |
| chr3  | 172820990 | 172821050 | 14 | + | 141 | ECT2      | epithelial cell transforming 2                                              | mRNA          |
| chr3  | 49533460  | 49533573  | 14 | + | 142 | DAG1      | dystroglycan 1                                                              | mRNA          |
| chr17 | 35266116  | 35266162  | 14 | + | 144 | SLFN5     | schlafen family member 5                                                    | mRNA          |
| chr3  | 49359959  | 49360096  | 14 | - | 144 | RHOA      | ras homolog family member A                                                 | mRNA          |
| chr10 | 70879428  | 70879539  | 14 | + | 153 | SGPL1     | sphingosine-1-phosphate lyase 1                                             | mRNA          |
| chr14 | 105470511 | 105470541 | 14 | + | 160 | MTA1      | metastasis associated 1                                                     | mRNA          |
| chr12 | 110721031 | 110721088 | 13 | - | 145 | PPP1CC    | protein phosphatase 1 catalytic subunit gamma                               | mRNA          |
| chr18 | 743065    | 743097    | 13 | - | 37  | YES1      | YES proto-oncogene 1                                                        | mRNA          |
| chr19 | 41292244  | 41292286  | 13 | + | 61  | HNRNPUL1  | heterogeneous nuclear ribonucleoprotein U like 1                            | mRNA          |
| chr5  | 96896796  | 96896860  | 13 | + | 68  | ERAP2     | endoplasmic reticulum aminopeptidase 2                                      | mRNA          |
| chr10 | 32911885  | 32911933  | 13 | - | 80  | ITGB1     | integrin subunit beta 1                                                     | mRNA          |
| chr17 | 58005825  | 58005909  | 13 | - | 92  | SRSF1     | serine and arginine rich splicing factor 1                                  | mRNA          |
| chr12 | 21646916  | 21647016  | 13 | - | 101 | LDHB      | lactate dehydrogenase B                                                     | mRNA          |
| chr7  | 2379133   | 2379242   | 13 | + | 110 | EIF3B     | eukaryotic translation initiation factor 3 subunit B                        | mRNA          |
| chr6  | 43159870  | 43159957  | 13 | + | 155 | PTK7      | protein tyrosine kinase 7 (inactive)                                        | mRNA          |
| chr14 | 20455913  | 20456101  | 13 | + | 189 | APEX1     | apurinic/aprimidinic endodeoxyribonuclease 1                                | mRNA          |
| chr19 | 40374518  | 40374620  | 13 | + | 198 | PLD3      | phospholipase D family member 3                                             | mRNA          |
| chr3  | 9249263   | 9249347   | 13 | - | 85  | SRGAP3    | SLIT-ROBO Rho GTPase activating protein 3                                   | mRNA          |
| chr3  | 112640729 | 112640814 | 13 | - | 86  | CCDC80    | coiled-coil domain containing 80                                            | mRNA          |
| chr4  | 11477326  | 11477375  | 13 | - | 63  |           |                                                                             | no annotation |
| chr13 | 109270414 | 109270445 | 13 | - | 110 |           |                                                                             | no annotation |
| chr11 | 118921049 | 118921108 | 13 | - | 124 |           |                                                                             | no annotation |
| chr11 | 35194842  | 35194883  | 13 | + | 49  | CD44      | CD44 molecule                                                               | mRNA          |
| chr8  | 115570800 | 115570864 | 13 | - | 67  | TRPS1     | transcriptional repressor GATA binding 1                                    | mRNA          |
| chr15 | 80444536  | 80444591  | 13 | + | 80  | ARNT2     | aryl hydrocarbon receptor nuclear translocator 2                            | mRNA          |
| chr9  | 76175248  | 76175284  | 13 | + | 82  | PCSK5     | proprotein convertase subtilisin/kexin type 5                               | mRNA          |
| chr16 | 85706687  | 85706764  | 13 | - | 103 | C16orf74  | chromosome 16 open reading frame 74                                         | mRNA          |
| chr3  | 122014951 | 122014986 | 13 | - | 129 | ILDR1     | immunoglobulin like domain containing receptor 1                            | mRNA          |
| chr9  | 33347717  | 33347807  | 13 | - | 133 | NFX1      | nuclear transcription factor, X-box binding 1                               | mRNA          |
| chr7  | 23529570  | 23529613  | 13 | - | 134 | TRA2A     | transformer 2 alpha homolog                                                 | mRNA          |
| chrX  | 71547730  | 71547789  | 13 | + | 166 | OGT       | O-linked N-acetylglucosamine (GlcNAc) transferase                           | mRNA          |
| chrX  | 74122491  | 74122543  | 13 | + | 54  | FTX       |                                                                             | lncRNA        |
| chr3  | 186787376 | 186787433 | 13 | + | 58  | SNORA63   |                                                                             | snoRNA        |
| chr3  | 52691394  | 52691445  | 13 | + | 68  | SNORD19C  |                                                                             | snoRNA        |
| chr2  | 202276437 | 202276513 | 13 | + | 84  | SNORD70   |                                                                             | snoRNA        |
| chr9  | 33952769  | 33952843  | 13 | - | 104 | SNORD121A |                                                                             | snoRNA        |
| chr11 | 8685437   | 8685565   | 13 | + | 135 | SNORA3B   |                                                                             | snoRNA        |
| chr14 | 53949961  | 53950002  | 13 | + | 49  | BMP4      | bone morphogenetic protein 4                                                | mRNA          |
| chr11 | 128460108 | 128460173 | 13 | - | 74  | ETS1      | ETS proto-oncogene 1                                                        | mRNA          |
| chr11 | 66003930  | 66004005  | 13 | + | 76  | BANF1     | barrier to autointegration factor 1                                         | mRNA          |
| chr20 | 44907568  | 44907645  | 13 | + | 78  | YWHAB     | tyrosine 3-monooxygenase/tryptophan 5-monooxygenase activation protein beta | mRNA          |
| chr20 | 44908209  | 44908286  | 13 | + | 82  | YWHAB     | tyrosine 3-monooxygenase/tryptophan 5-monooxygenase activation protein beta | mRNA          |
| chr7  | 106090638 | 106090675 | 13 | - | 82  | SYPL1     | synaptophysin like 1                                                        | mRNA          |

Supplementary Table S4\_Specific Peaks bound to PURa in CLIP-seq\_PURa vs IgG

|       |           |           |    |   |     |          |                                                        |               |
|-------|-----------|-----------|----|---|-----|----------|--------------------------------------------------------|---------------|
| chr9  | 94460683  | 94460716  | 13 | + | 82  | MFSD14B  | major facilitator superfamily domain containing 14B    | mRNA          |
| chr1  | 211573575 | 211573636 | 13 | - | 83  | SLC30A1  | solute carrier family 30 (zinc transporter), member 1  | mRNA          |
| chr14 | 49894637  | 49894720  | 13 | + | 84  | ARF6     | ADP-ribosylation factor 6                              | mRNA          |
| chr20 | 51599806  | 51599882  | 13 | - | 85  | ATP9A    | ATPase phospholipid transporting 9A                    | mRNA          |
| chr7  | 116559524 | 116559584 | 13 | + | 86  | CAV1     | caveolin 1                                             | mRNA          |
| chr9  | 127940947 | 127941010 | 13 | - | 89  | FAM102A  | family with sequence similarity 102 member A           | mRNA          |
| chr2  | 3515579   | 3515619   | 13 | - | 90  | ADI1     | acireductone dioxygenase 1                             | mRNA          |
| chr15 | 42210686  | 42210761  | 13 | - | 94  | TMEM87A  | transmembrane protein 87A                              | mRNA          |
| chr3  | 152463715 | 152463809 | 13 | + | 95  | MBNL1    | muscleblind like splicing regulator 1                  | mRNA          |
| chr14 | 63684982  | 63685058  | 13 | - | 96  | SGPP1    | sphingosine-1-phosphate phosphatase 1                  | mRNA          |
| chr1  | 154583289 | 154583356 | 13 | - | 96  | ADAR     | adenosine deaminase RNA specific                       | mRNA          |
| chr1  | 225496319 | 225496418 | 13 | - | 100 | ENAH     | ENAH actin regulator                                   | mRNA          |
| chr2  | 241352098 | 241352127 | 13 | + | 104 | SEPTIN2  | septin 2                                               | mRNA          |
| chr19 | 48615343  | 48615430  | 13 | - | 105 | RPL18    | ribosomal protein L18                                  | mRNA          |
| chr1  | 144440487 | 144440563 | 13 | - | 108 | NBPF15   | NBPF member 15                                         | mRNA          |
| chr19 | 44663347  | 44663381  | 13 | + | 109 | PVR      | PVR cell adhesion molecule                             | mRNA          |
| chr4  | 183639944 | 183640023 | 13 | - | 110 | RWDD4    | RWD domain containing 4                                | mRNA          |
| chr11 | 95130993  | 95131097  | 13 | + | 111 | ENDOD1   | endonuclease domain containing 1                       | mRNA          |
| chrX  | 20152066  | 20152177  | 13 | - | 112 | RPS6KA3  | ribosomal protein S6 kinase A3                         | mRNA          |
| chr22 | 36226701  | 36226744  | 13 | - | 114 | APOL2    | apolipoprotein L2                                      | mRNA          |
| chrX  | 153700728 | 153700844 | 13 | - | 117 | BCAP31   | B cell receptor associated protein 31                  | mRNA          |
| chr12 | 50475976  | 50476023  | 13 | + | 119 | LARP4    | La ribonucleoprotein 4                                 | mRNA          |
| chr15 | 65888516  | 65888587  | 13 | + | 122 | RAB11A   | RAB11A, member RAS oncogene family                     | mRNA          |
| chr5  | 256542    | 256662    | 13 | + | 122 | SDHA     | succinate dehydrogenase complex flavoprotein subunit A | mRNA          |
| chr12 | 48938717  | 48938787  | 13 | - | 122 | ARF3     | ADP ribosylation factor 3                              | mRNA          |
| chr11 | 130877273 | 130877313 | 13 | - | 127 | SNX19    | sorting nexin 19                                       | mRNA          |
| chr1  | 29326258  | 29326328  | 13 | + | 128 | PTPRU    | protein tyrosine phosphatase receptor type U           | mRNA          |
| chr19 | 47209809  | 47209918  | 13 | + | 137 | SAE1     | SUMO1 activating enzyme subunit 1                      | mRNA          |
| chr3  | 48693787  | 48693823  | 13 | - | 137 | IP6K2    | inositol hexakisphosphate kinase 2                     | mRNA          |
| chr17 | 42314563  | 42314571  | 13 | - | 153 | STAT3    | signal transducer and activator of transcription 3     | mRNA          |
| chr5  | 175959608 | 175959772 | 13 | - | 165 | THOC3    | THO complex 3                                          | mRNA          |
| chr15 | 65887805  | 65887934  | 12 | + | 244 | RAB11A   | RAB11A, member RAS oncogene family                     | mRNA          |
| chr1  | 39568914  | 39568939  | 12 | - | 39  | PABPC4   | poly(A) binding protein cytoplasmic 4                  | mRNA          |
| chr8  | 61643385  | 61643433  | 12 | - | 49  | ASPH     | aspartate beta-hydroxylase                             | mRNA          |
| chr3  | 105552143 | 105552182 | 12 | + | 57  | ALCAM    | activated leukocyte cell adhesion molecule             | mRNA          |
| chr8  | 123209390 | 123209442 | 12 | + | 59  | FAM83A   | family with sequence similarity 83 member A            | mRNA          |
| chr12 | 103941467 | 103941527 | 12 | + | 61  | HSP90B1  | heat shock protein 90 beta family member 1             | mRNA          |
| chr14 | 61740512  | 61740575  | 12 | + | 64  | HIF1A    | hypoxia inducible factor 1 subunit alpha inhibitor     | mRNA          |
| chr4  | 186600298 | 186600360 | 12 | - | 77  | FAT1     | FAT atypical cadherin 1                                | mRNA          |
| chr5  | 141578224 | 141578300 | 12 | - | 77  | DIAPH1   | diaphanous related formin 1                            | mRNA          |
| chr8  | 39082991  | 39083073  | 12 | + | 83  | ADAM9    | ADAM metallopeptidase domain 9                         | mRNA          |
| chr3  | 53228055  | 53228149  | 12 | - | 95  | TKT      | transketolase                                          | mRNA          |
| chr2  | 43963612  | 43963655  | 12 | - | 95  | LRPPRC   | leucine rich pentatricopeptide repeat containing       | mRNA          |
| chr1  | 156333546 | 156333638 | 12 | - | 98  | CCT3     | chaperonin containing TCPI subunit 3                   | mRNA          |
| chr3  | 105547192 | 105547253 | 12 | + | 106 | ALCAM    | activated leukocyte cell adhesion molecule             | mRNA          |
| chr5  | 133096097 | 133096204 | 12 | + | 108 | HSPA4    | heat shock protein family A (Hsp70) member 4           | mRNA          |
| chr22 | 45535244  | 45535285  | 12 | + | 109 | FBLN1    | fibulin 1                                              | mRNA          |
| chr17 | 42999932  | 43000102  | 12 | + | 171 | RPL27    | ribosomal protein L27                                  | mRNA          |
| chr11 | 1759015   | 1759087   | 12 | - | 73  | CSTD     | cathepsin D                                            | mRNA          |
| chr21 | 17707167  | 17707213  | 12 | - | 60  |          |                                                        | no annotation |
| chr5  | 80651419  | 80651460  | 12 | - | 42  | DHFR     | dihydrofolate reductase                                | mRNA          |
| chr2  | 177261848 | 177261909 | 12 | - | 64  | NFE2L2   | nuclear factor, erythroid 2 like 2                     | mRNA          |
| chr1  | 70226461  | 70226509  | 12 | + | 65  | SRSF11   | serine and arginine rich splicing factor 11            | mRNA          |
| chr11 | 71477302  | 71477338  | 12 | + | 69  | NADSYN1  | NAD synthetase 1                                       | mRNA          |
| chr14 | 21263136  | 21263206  | 12 | - | 71  | HNRNPC   | heterogeneous nuclear ribonucleoprotein C              | mRNA          |
| chr1  | 151213417 | 151213455 | 12 | + | 73  | PIP5K1A  | phosphatidylinositol-4-phosphate 5-kinase type 1 alpha | mRNA          |
| chr22 | 49573086  | 49573136  | 12 | + | 78  | C22orf34 | chromosome 22 open reading frame 34                    | mRNA          |
| chr14 | 21262277  | 21262335  | 12 | - | 84  | HNRNPC   | heterogeneous nuclear ribonucleoprotein C              | mRNA          |
| chr12 | 110049571 | 110049636 | 12 | + | 84  | C12orf76 | chromosome 12 open reading frame 76                    | mRNA          |
| chr6  | 151948765 | 151948842 | 12 | + | 85  | ESR1     | estrogen receptor 1                                    | mRNA          |
| chr2  | 233702907 | 233702953 | 12 | + | 86  | UGT1A8   | UDP glucuronosyltransferase 1 family, polypeptide A8   | mRNA          |
| chr7  | 6700343   | 6700390   | 12 | - | 95  | ZNF12    | zinc finger protein 12                                 | mRNA          |
| chr19 | 47719983  | 47720037  | 12 | + | 114 | EHD2     | EH domain containing 2                                 | mRNA          |
| chr20 | 34073179  | 34073234  | 12 | + | 120 | RALY     | RALY heterogeneous nuclear ribonucleoprotein           | mRNA          |

Supplementary Table S4\_Specific Peaks bound to PURa in CLIP-seq\_PURa vs IgG

|       |           |           |    |   |     |          |                                                                             |               |
|-------|-----------|-----------|----|---|-----|----------|-----------------------------------------------------------------------------|---------------|
| chr2  | 241507    | 241559    | 12 | - | 121 | SH3YL1   | SH3 and SYLF domain containing 1                                            | mRNA          |
| chr19 | 36213945  | 36213984  | 12 | - | 122 | ZNF565   | zinc finger protein 565                                                     | mRNA          |
| chr22 | 16980486  | 16980533  | 12 | + | 127 | GAB4     | GRB2 associated binding protein family member 4                             | mRNA          |
| chr21 | 33530392  | 33530431  | 12 | - | 145 | GART     | phosphoribosylglycinamide formyltransferase, phosphoribosylglycinamide syn  | mRNA          |
| chr15 | 101966530 | 101966573 | 12 | + | 132 | WASH3P   |                                                                             | pseudo        |
| chrX  | 73802053  | 73802123  | 12 | + | 73  | TSIX     |                                                                             | lncRNA        |
| chr2  | 241351991 | 241352033 | 12 | + | 44  | SEPTIN2  | septin 2                                                                    | mRNA          |
| chr6  | 122443503 | 122443550 | 12 | - | 48  | SERINC1  | serine incorporator 1                                                       | mRNA          |
| chr3  | 41239941  | 41239986  | 12 | + | 48  | CTNNB1   | catenin beta 1                                                              | mRNA          |
| chr5  | 314621    | 314669    | 12 | + | 49  | PDCD6    | programmed cell death 6                                                     | mRNA          |
| chr16 | 19310069  | 19310105  | 12 | - | 55  | CLEC19A  | C-type lectin domain containing 19A                                         | mRNA          |
| chr9  | 98015556  | 98015615  | 12 | + | 60  | ANP32B   | acidic (leucine-rich) nuclear phosphoprotein 32 family, member B            | mRNA          |
| chr12 | 53479596  | 53479655  | 12 | + | 60  | PCBP2    | poly(rC) binding protein 2                                                  | mRNA          |
| chr1  | 119912491 | 119912556 | 12 | - | 66  | NOTCH2   | notch receptor 2                                                            | mRNA          |
| chr11 | 34100070  | 34100141  | 12 | + | 72  | CAPRIN1  | cell cycle associated protein 1                                             | mRNA          |
| chr6  | 113861101 | 113861164 | 12 | + | 73  | MARCKS   | myristoylated alanine-rich protein kinase C substrate                       | mRNA          |
| chr15 | 100916292 | 100916364 | 12 | + | 74  | ALDH1A3  | aldehyde dehydrogenase 1 family member A3                                   | mRNA          |
| chr15 | 73560284  | 73560343  | 12 | - | 79  | NPTN     | neuroligin 1                                                                | mRNA          |
| chr12 | 84860988  | 84861057  | 12 | - | 82  | SLC6A15  | solute carrier family 6 member 15                                           | mRNA          |
| chr9  | 128694654 | 128694723 | 12 | + | 86  | SET      | SET nuclear proto-oncogene                                                  | mRNA          |
| chr10 | 96519760  | 96519839  | 12 | - | 87  | TM9SF3   | transmembrane 9 superfamily member 3                                        | mRNA          |
| chr12 | 125030942 | 125031025 | 12 | + | 90  | BRI3BP   | BRI3 binding protein                                                        | mRNA          |
| chr18 | 30992356  | 30992431  | 12 | - | 91  | DSC3     | desmocollin 3                                                               | mRNA          |
| chr20 | 37241527  | 37241619  | 12 | + | 93  | RPN2     | ribophorin II                                                               | mRNA          |
| chr8  | 142784896 | 142784990 | 12 | - | 95  | LY6D     | lymphocyte antigen 6 complex, locus D                                       | mRNA          |
| chr14 | 77508393  | 77508478  | 12 | - | 97  | SPTLC2   | serine palmitoyltransferase long chain base subunit 2                       | mRNA          |
| chr2  | 170993414 | 170993442 | 12 | - | 99  | TLK1     | tousled like kinase 1                                                       | mRNA          |
| chr12 | 6238060   | 6238087   | 12 | + | 100 | CD9      | CD9 molecule                                                                | mRNA          |
| chr21 | 17569286  | 17569357  | 12 | + | 101 | CXADR    | CXADR Ig-like cell adhesion molecule                                        | mRNA          |
| chr12 | 26973746  | 26973844  | 12 | - | 104 | TM7SF3   | transmembrane 7 superfamily member 3                                        | mRNA          |
| chr20 | 44908022  | 44908124  | 12 | + | 108 | YWHAB    | tyrosine 3-monooxygenase/tryptophan 5-monooxygenase activation protein beta | mRNA          |
| chr1  | 116987216 | 116987315 | 12 | + | 113 | PTGFRN   | prostaglandin F2 receptor inhibitor                                         | mRNA          |
| chr11 | 88293905  | 88293990  | 12 | - | 115 | CTSC     | cathepsin C                                                                 | mRNA          |
| chr9  | 136007318 | 136007413 | 12 | - | 118 | NACC2    | NACC family member 2                                                        | mRNA          |
| chr8  | 6757613   | 6757716   | 12 | + | 119 | AGPAT5   | 1-acylglycerol-3-phosphate O-acyltransferase 5                              | mRNA          |
| chr6  | 2785265   | 2785390   | 12 | + | 126 | WRNIP1   | WRN helicase interacting protein 1                                          | mRNA          |
| chr14 | 103136919 | 103137049 | 12 | + | 131 | TNFAIP2  | TNF alpha induced protein 2                                                 | mRNA          |
| chr2  | 177538566 | 177538664 | 12 | + | 139 | AGPS     | alkylglycerone phosphate synthase                                           | mRNA          |
| chr15 | 40857287  | 40857422  | 12 | + | 163 | SPINT1   | serine peptidase inhibitor                                                  | mRNA          |
| chr4  | 108621950 | 108621997 | 11 | + | 55  | RPL34    | ribosomal protein L34                                                       | mRNA          |
| chr11 | 62572583  | 62572612  | 11 | - | 30  | EEF1G    | eukaryotic translation elongation factor 1 gamma                            | mRNA          |
| chr11 | 130141497 | 130141536 | 11 | + | 40  | APLP2    | amyloid beta precursor like protein 2                                       | mRNA          |
| chr3  | 196065442 | 196065486 | 11 | - | 45  | TFRC     | transferrin receptor                                                        | mRNA          |
| chr11 | 33339349  | 33339396  | 11 | + | 48  | HIPK3    | homeodomain interacting protein kinase 3                                    | mRNA          |
| chr2  | 96300997  | 96301053  | 11 | - | 57  | SNRNP200 | small nuclear ribonucleoprotein U5 subunit 200                              | mRNA          |
| chr6  | 85533739  | 85533780  | 11 | - | 62  | SNX14    | sorting nexin 14                                                            | mRNA          |
| chr3  | 180962882 | 180962951 | 11 | + | 70  | FXR1     | FMR1 autosomal homolog 1                                                    | mRNA          |
| chr3  | 37327702  | 37327779  | 11 | + | 78  | GOLGA4   | golgin A4                                                                   | mRNA          |
| chr2  | 27383995  | 27384073  | 11 | - | 79  | PPM1G    | protein phosphatase, Mg2+/Mn2+ dependent, 1G                                | mRNA          |
| chr5  | 34938891  | 34938969  | 11 | + | 79  | DNAJC21  | DnaJ heat shock protein family (Hsp40) member C21                           | mRNA          |
| chr3  | 149177889 | 149177964 | 11 | - | 80  | CP       | ceruloplasmin                                                               | mRNA          |
| chr1  | 156135900 | 156135984 | 11 | + | 85  | LMNA     | lamin A/C                                                                   | mRNA          |
| chr12 | 110326389 | 110326475 | 11 | + | 87  | ATP2A2   | ATPase sarcoplasmic/endoplasmic reticulum Ca2+ transporting 2               | mRNA          |
| chr2  | 55871050  | 55871123  | 11 | - | 104 | EFEMP1   | EGF containing fibulin extracellular matrix protein 1                       | mRNA          |
| chr21 | 31667257  | 31667375  | 11 | + | 119 | SOD1     | superoxide dismutase 1                                                      | mRNA          |
| chr3  | 184334726 | 184334845 | 11 | + | 120 | EIF4G1   | eukaryotic translation initiation factor 4 gamma 1                          | mRNA          |
| chr5  | 139321933 | 139322029 | 11 | + | 133 | MATR3    | matrin 3                                                                    | mRNA          |
| chr16 | 16379141  | 16379200  | 11 | + | 80  | NP1A7    | nuclear pore complex interacting protein family, member A7                  | mRNA          |
| chr15 | 98649436  | 98649510  | 11 | + | 85  | IGF1R    | insulin like growth factor 1 receptor                                       | mRNA          |
| chr22 | 15304326  | 15304385  | 11 | + | 71  |          |                                                                             | no annotation |
| chr22 | 15283751  | 15283785  | 11 | - | 35  |          |                                                                             | no annotation |
| chr2  | 172509110 | 172509146 | 11 | - | 40  |          |                                                                             | no annotation |
| chr15 | 32185995  | 32186046  | 11 | - | 52  |          |                                                                             | no annotation |
| chr6  | 2881296   | 2881331   | 11 | - | 76  |          |                                                                             | no annotation |

Supplementary Table S4\_Specific Peaks bound to PURa in CLIP-seq\_PURa vs IgG

|       |           |           |    |   |     |           |                                                               |        |
|-------|-----------|-----------|----|---|-----|-----------|---------------------------------------------------------------|--------|
| chr19 | 53158879  | 53158914  | 11 | - | 36  | ZNF347    | zinc finger protein 347                                       | mRNA   |
| chr6  | 47002365  | 47002404  | 11 | - | 40  | ADGRF1    | adhesion G protein-coupled receptor F1                        | mRNA   |
| chr18 | 80162316  | 80162359  | 11 | - | 46  | PARD6G    | par-6 family cell polarity regulator gamma                    | mRNA   |
| chr9  | 21892790  | 21892842  | 11 | - | 63  | MTAP      | methylthioadenosine phosphorylase                             | mRNA   |
| chr2  | 233700887 | 233700949 | 11 | + | 66  | UGT1A8    | UDP glucuronosyltransferase 1 family, polypeptide A8          | mRNA   |
| chr1  | 205748089 | 205748145 | 11 | - | 67  | NUCKS1    | nuclear casein kinase and cyclin-dependent kinase substrate 1 | mRNA   |
| chr6  | 79201778  | 79201820  | 11 | - | 73  | HMGN3     | high mobility group nucleosomal binding domain 3              | mRNA   |
| chr14 | 96533445  | 96533521  | 11 | + | 77  | PAPOLA    | poly(A) polymerase alpha                                      | mRNA   |
| chr14 | 55283842  | 55283911  | 11 | + | 79  | FBXO34    | F-box protein 34                                              | mRNA   |
| chr22 | 45929771  | 45929843  | 11 | - | 88  | WNT7B     | Wnt family member 7B                                          | mRNA   |
| chr7  | 44005215  | 44005301  | 11 | - | 99  | SPDYE1    | speedy/RINGO cell cycle regulator family member E1            | mRNA   |
| chr2  | 227528930 | 227529021 | 11 | + | 104 | AGFG1     | ArfGAP with FG repeats 1                                      | mRNA   |
| chr1  | 1737226   | 1737315   | 11 | - | 109 | SLC35E2A  | solute carrier family 35 member E2A                           | mRNA   |
| chr17 | 82146886  | 82146962  | 11 | - | 118 | CCDC57    | coiled-coil domain containing 57                              | mRNA   |
| chr20 | 36137386  | 36137423  | 11 | + | 121 | EPB41L1   | erythrocyte membrane protein band 4.1 like 1                  | mRNA   |
| chr14 | 19372669  | 19372714  | 11 | + | 55  | LINC01297 |                                                               | lncRNA |
| chr15 | 25256607  | 25256646  | 11 | - | 78  | SNHG14    |                                                               | lncRNA |
| chr5  | 139276212 | 139276324 | 11 | + | 149 | SNORA74D  |                                                               | snoRNA |
| chr1  | 145594485 | 145594576 | 11 | - | 117 | NBPF25P   |                                                               | pseudo |
| chr1  | 64106647  | 64106701  | 11 | + | 65  | ROR1-AS1  |                                                               | lncRNA |
| chr2  | 8561720   | 8561763   | 11 | + | 88  | LINC01814 |                                                               | lncRNA |
| chr1  | 134789    | 134831    | 11 | - | 103 | LOC729737 |                                                               | lncRNA |
| chr2  | 66392055  | 66392149  | 11 | - | 180 | LINC01873 |                                                               | lncRNA |
| chr9  | 88475726  | 88475761  | 11 | - | 36  | SPIN1     | spindlin 1                                                    | mRNA   |
| chr22 | 46362665  | 46362704  | 11 | - | 41  | CELSR1    | cadherin EGF LAG seven-pass G-type receptor 1                 | mRNA   |
| chr19 | 5206283   | 5206329   | 11 | - | 47  | PTPRS     | protein tyrosine phosphatase receptor type S                  | mRNA   |
| chr5  | 177331689 | 177331736 | 11 | - | 48  | LMAN2     | lectin, mannose binding 2                                     | mRNA   |
| chr1  | 161071920 | 161071965 | 11 | - | 49  | NECTIN4   | nectin cell adhesion molecule 4                               | mRNA   |
| chr3  | 196051058 | 196051108 | 11 | - | 51  | TFRC      | transferrin receptor                                          | mRNA   |
| chr5  | 157786562 | 157786610 | 11 | - | 52  | CLINT1    | clathrin interactor 1                                         | mRNA   |
| chr14 | 77510270  | 77510321  | 11 | - | 52  | SPTLC2    | serine palmitoyltransferase long chain base subunit 2         | mRNA   |
| chr1  | 235167390 | 235167433 | 11 | - | 53  | ARID4B    | AT-rich interaction domain 4B                                 | mRNA   |
| chr17 | 38727157  | 38727205  | 11 | + | 56  | MLLT6     | MLLT6, PHD finger containing                                  | mRNA   |
| chr19 | 35267898  | 35267944  | 11 | + | 56  | LSR       | lipolysis stimulated lipoprotein receptor                     | mRNA   |
| chr18 | 673388    | 673443    | 11 | + | 56  | TYMS      | thymidylate synthetase                                        | mRNA   |
| chr17 | 78357136  | 78357184  | 11 | - | 57  | SOCS3     | suppressor of cytokine signaling 3                            | mRNA   |
| chr11 | 118750996 | 118751053 | 11 | - | 59  | DDX6      | DEAD-box helicase 6                                           | mRNA   |
| chr8  | 41624003  | 41624039  | 11 | + | 61  | GPAT4     | glycerol-3-phosphate acyltransferase 4                        | mRNA   |
| chr14 | 21210683  | 21210743  | 11 | - | 61  | HNRNPC    | heterogeneous nuclear ribonucleoprotein C                     | mRNA   |
| chr20 | 32850149  | 32850209  | 11 | + | 62  | MAPRE1    | microtubule-associated protein, RP/EB family, member 1        | mRNA   |
| chr2  | 65088201  | 65088260  | 11 | - | 63  | RAB1A     | RAB1A, member RAS oncogene family                             | mRNA   |
| chr3  | 122575035 | 122575098 | 11 | + | 65  | DTX3L     | deltex E3 ubiquitin ligase 3L                                 | mRNA   |
| chr5  | 97034651  | 97034713  | 11 | + | 65  | LNPEP     | leucyl and cystinyl aminopeptidase                            | mRNA   |
| chr4  | 76160969  | 76161033  | 11 | - | 65  | SCARB2    | scavenger receptor class B member 2                           | mRNA   |
| chr2  | 232857667 | 232857716 | 11 | + | 66  | GIGYF2    | GRB10 interacting GYF protein 2                               | mRNA   |
| chr19 | 57863571  | 57863631  | 11 | + | 67  | ZNF587    | zinc finger protein 587                                       | mRNA   |
| chr13 | 48261714  | 48261772  | 11 | + | 67  | ITM2B     | integral membrane protein 2B                                  | mRNA   |
| chr17 | 61945216  | 61945275  | 11 | - | 67  | MED13     | mediator complex subunit 13                                   | mRNA   |
| chr2  | 200823017 | 200823084 | 11 | + | 68  | BZW1      | basic leucine zipper and W2 domains 1                         | mRNA   |
| chr21 | 37202518  | 37202569  | 11 | + | 71  | TTC3      | tetratricopeptide repeat domain 3                             | mRNA   |
| chr3  | 42646929  | 42646987  | 11 | + | 71  | NKTR      | natural killer cell triggering receptor                       | mRNA   |
| chr7  | 75410828  | 75410876  | 11 | + | 71  | TRIM73    | tripartite motif containing 73                                | mRNA   |
| chr3  | 191267690 | 191267732 | 11 | + | 72  | UTS2B     | Urotensin 2B                                                  | mRNA   |
| chr8  | 97852431  | 97852494  | 11 | + | 74  | LAPTM4B   | lysosomal protein transmembrane 4 beta                        | mRNA   |
| chr10 | 123165193 | 123165246 | 11 | + | 75  | BUB3      | BUB3 mitotic checkpoint protein                               | mRNA   |
| chr12 | 56238757  | 56238801  | 11 | - | 76  | ANKRD52   | ankyrin repeat domain 52                                      | mRNA   |
| chr6  | 31830106  | 31830144  | 11 | + | 76  | HSPA1B    | heat shock 70kDa protein 1B                                   | mRNA   |
| chr17 | 50751514  | 50751525  | 11 | + | 76  | LUC7L3    | LUC7 like 3 pre-mRNA splicing factor                          | mRNA   |
| chr1  | 30932178  | 30932254  | 11 | - | 77  | PUM1      | pumilio RNA binding family member 1                           | mRNA   |
| chr16 | 23067892  | 23067957  | 11 | - | 77  | USP31     | ubiquitin specific peptidase 31                               | mRNA   |
| chr16 | 1349381   | 1349458   | 11 | - | 78  | TSR3      | TSR3, 20S rRNA accumulation, homolog (S. cerevisiae)          | mRNA   |
| chr18 | 26016762  | 26016831  | 11 | - | 80  | SS18      | SS18 subunit of BAF chromatin remodeling complex              | mRNA   |
| chr3  | 194402828 | 194402896 | 11 | - | 82  | ATP13A3   | ATPase 13A3                                                   | mRNA   |
| chr1  | 162523336 | 162523380 | 11 | + | 84  | UHMK1     | U2AF homology motif kinase 1                                  | mRNA   |

Supplementary Table S4\_Specific Peaks bound to PURa in CLIP-seq\_PURa vs IgG

|       |           |           |    |   |     |              |                                                                       |               |
|-------|-----------|-----------|----|---|-----|--------------|-----------------------------------------------------------------------|---------------|
| chr6  | 79201513  | 79201599  | 11 | - | 87  | HMGN3        | high mobility group nucleosomal binding domain 3                      | mRNA          |
| chr22 | 19037615  | 19037655  | 11 | - | 87  | DGCR2        | DiGeorge syndrome critical region gene 2                              | mRNA          |
| chr3  | 58171753  | 58171840  | 11 | + | 88  | FLNB         | filamin B                                                             | mRNA          |
| chr11 | 111293731 | 111293818 | 11 | - | 88  | COLCA1       | colorectal cancer associated 1                                        | mRNA          |
| chr12 | 92143942  | 92143988  | 11 | - | 95  | BTG1         | B-cell translocation gene 1, anti-proliferative                       | mRNA          |
| chrX  | 154436247 | 154436342 | 11 | + | 96  | ATP6AP1      | ATPase H <sup>+</sup> transporting accessory protein 1                | mRNA          |
| chr5  | 83054654  | 83054690  | 11 | - | 98  | TMEM167A     | transmembrane protein 167A                                            | mRNA          |
| chr4  | 168927458 | 168927508 | 11 | + | 98  | PALLD        | palladin                                                              | mRNA          |
| chr9  | 113261343 | 113261413 | 11 | + | 101 | SLC31A1      | solute carrier family 31 (copper transporter), member 1               | mRNA          |
| chr11 | 125620892 | 125620988 | 11 | + | 101 | STT3A        | STT3 oligosaccharyltransferase complex catalytic subunit A            | mRNA          |
| chr15 | 98962557  | 98962568  | 11 | + | 104 | IGF1R        | insulin like growth factor 1 receptor                                 | mRNA          |
| chr10 | 74119630  | 74119708  | 11 | + | 106 | VCL          | vinculin                                                              | mRNA          |
| chr3  | 195568836 | 195568941 | 11 | - | 107 | APOD         | apolipoprotein D                                                      | mRNA          |
| chr10 | 103595294 | 103595395 | 11 | - | 108 | SH3PXD2A     | SH3 and PX domains 2A                                                 | mRNA          |
| chr20 | 45816804  | 45816852  | 11 | + | 121 | UBE2C        | ubiquitin conjugating enzyme E2 C                                     | mRNA          |
| chr5  | 176375182 | 176375218 | 11 | - | 134 | ARL10        | ADP-ribosylation factor-like 10                                       | mRNA          |
| chr5  | 176375235 | 176375299 | 11 | - | 134 | ARL10        | ADP-ribosylation factor-like 10                                       | mRNA          |
| chr15 | 77046212  | 77046243  | 11 | - | 137 | TSPAN3       | tetraspanin 3                                                         | mRNA          |
| chr15 | 77046283  | 77046348  | 11 | - | 137 | TSPAN3       | tetraspanin 3                                                         | mRNA          |
| chr19 | 35658593  | 35658673  | 11 | + | 147 | COX6B1       | cytochrome c oxidase subunit 6B1                                      | mRNA          |
| chr11 | 62714889  | 62715003  | 11 | - | 159 | HNRNPUL2     | heterogeneous nuclear ribonucleoprotein U like 2                      | mRNA          |
| chr19 | 48197135  | 48197224  | 11 | + | 105 | ZSWIM9       | zinc finger SWIM-type containing 9                                    | mRNA          |
| chr1  | 203869869 | 203869983 | 10 | + | 122 | SNRPE        | small nuclear ribonucleoprotein polypeptide E                         | mRNA          |
| chr6  | 7585371   | 7585407   | 10 | + | 37  | DSP          | desmoplakin                                                           | mRNA          |
| chr15 | 76935599  | 76935641  | 10 | + | 43  | RCN2         | reticulocalbin 2                                                      | mRNA          |
| chr2  | 27383951  | 27383994  | 10 | - | 44  | PPM1G        | protein phosphatase, Mg <sup>2+</sup> /Mn <sup>2+</sup> dependent, 1G | mRNA          |
| chr2  | 232549134 | 232549165 | 10 | + | 46  | TIGD1        | tigger transposable element derived 1                                 | mRNA          |
| chr19 | 41281223  | 41281275  | 10 | + | 54  | HNRNPUL1     | heterogeneous nuclear ribonucleoprotein U like 1                      | mRNA          |
| chr6  | 73782613  | 73782671  | 10 | + | 59  | CD109        | CD109 molecule                                                        | mRNA          |
| chrX  | 53584214  | 53584268  | 10 | - | 66  | HUWE1        | HECT, UBA and WWE domain containing E3 ubiquitin protein ligase 1     | mRNA          |
| chr1  | 119968076 | 119968126 | 10 | - | 70  | NOTCH2       | notch receptor 2                                                      | mRNA          |
| chr6  | 18258330  | 18258405  | 10 | - | 76  | DEK          | DEK proto-oncogene                                                    | mRNA          |
| chr11 | 65624470  | 65624523  | 10 | + | 84  | PCNX3        | pecanex 3                                                             | mRNA          |
| chr1  | 10403070  | 10403122  | 10 | + | 90  | PGD          | phosphogluconate dehydrogenase                                        | mRNA          |
| chr3  | 31622202  | 31622283  | 10 | + | 92  | STT3B        | STT3 oligosaccharyltransferase complex catalytic subunit B            | mRNA          |
| chr2  | 61877392  | 61877496  | 10 | - | 105 | CCT4         | chaperonin containing TCP1 subunit 4                                  | mRNA          |
| chr20 | 45670212  | 45670256  | 10 | - | 73  | WFDC11       | WAP four-disulfide core domain 11                                     | mRNA          |
| chr5  | 163235674 | 163235724 | 10 | + | 61  |              |                                                                       | no annotation |
| chr16 | 67205324  | 67205360  | 10 | + | 49  |              |                                                                       | no annotation |
| chr4  | 65858797  | 65858842  | 10 | - | 57  |              |                                                                       | no annotation |
| chr15 | 38140499  | 38140553  | 10 | + | 68  |              |                                                                       | no annotation |
| chr13 | 109270055 | 109270107 | 10 | - | 74  |              |                                                                       | no annotation |
| chr15 | 91035528  | 91035587  | 10 | - | 79  |              |                                                                       | no annotation |
| chr22 | 17028401  | 17028444  | 10 | - | 44  |              |                                                                       | no annotation |
| chr11 | 70397293  | 70397348  | 10 | - | 65  |              |                                                                       | no annotation |
| chr1  | 110939937 | 110940041 | 10 | - | 105 |              |                                                                       | no annotation |
| chr3  | 185293013 | 185293046 | 10 | + | 37  | MAP3K13      | mitogen-activated protein kinase kinase kinase 13                     | mRNA          |
| chr2  | 177249593 | 177249630 | 10 | - | 38  | NFE2L2       | nuclear factor, erythroid 2 like 2                                    | mRNA          |
| chr9  | 116612382 | 116612416 | 10 | - | 41  | ASTN2        | astrotactin 2                                                         | mRNA          |
| chr11 | 32587104  | 32587144  | 10 | + | 43  | EIF3M        | eukaryotic translation initiation factor 3 subunit M                  | mRNA          |
| chr3  | 54638639  | 54638694  | 10 | + | 56  | CACNA2D3     | calcium voltage-gated channel auxiliary subunit alpha2delta 3         | mRNA          |
| chr22 | 16977670  | 16977726  | 10 | - | 60  | GAB4         | GRB2 associated binding protein family member 4                       | mRNA          |
| chr14 | 55581091  | 55581145  | 10 | + | 64  | KTN1         | kinectin 1                                                            | mRNA          |
| chr1  | 223770200 | 223770254 | 10 | + | 71  | CAPN2        | calpain 2                                                             | mRNA          |
| chr19 | 47721197  | 47721266  | 10 | + | 82  | EHD2         | EH domain containing 2                                                | mRNA          |
| chr7  | 74883112  | 74883166  | 10 | - | 87  | STAG3L2      | stromal antigen 3-like 2                                              | mRNA          |
| chr12 | 22668388  | 22668435  | 10 | + | 118 | ETNK1        | ethanolamine kinase 1                                                 | mRNA          |
| chr14 | 76281481  | 76281515  | 10 | - | 54  | RP11-516J2.1 |                                                                       | lncRNA        |
| chr10 | 100381881 | 100381952 | 10 | - | 72  | OLMALINC     | oligodendrocyte maturation-associated long intergenic non-coding RNA  | lncRNA        |
| chr12 | 50456571  | 50456641  | 10 | + | 74  | SNORD133     |                                                                       | snoRNA        |
| chr15 | 84201552  | 84201605  | 10 | - | 110 | GOLGA2P7     |                                                                       | pseudo        |
| chr10 | 42752103  | 42752139  | 10 | - | 38  | LOC283028    |                                                                       | lncRNA        |
| chr8  | 116875635 | 116875683 | 10 | - | 59  | RAD21-AS1    |                                                                       | lncRNA        |
| chr1  | 67603487  | 67603521  | 10 | + | 100 | C11orf72     |                                                                       | lncRNA        |



Supplementary Table S4\_Specific Peaks bound to PURa in CLIP-seq\_PURa vs IgG

|       |           |           |    |   |     |          |                                                                 |        |
|-------|-----------|-----------|----|---|-----|----------|-----------------------------------------------------------------|--------|
| chr11 | 67603544  | 67603581  | 10 | + | 100 | C11orf72 |                                                                 | lncRNA |
| chr18 | 46669886  | 46669909  | 10 | - | 36  | ST8SIA5  | ST8 alpha-N-acetyl-neuraminidase alpha-2,8-sialyltransferase 5  | mRNA   |
| chr2  | 241352048 | 241352083 | 10 | + | 36  | SEPTIN2  | septin 2                                                        | mRNA   |
| chr11 | 101998391 | 101998422 | 10 | - | 36  | CEP126   | centrosomal protein 126                                         | mRNA   |
| chr19 | 11146895  | 11146931  | 10 | - | 38  | SPC24    | SPC24 component of NDC80 kinetochore complex                    | mRNA   |
| chr11 | 111295163 | 111295201 | 10 | - | 41  | COLCA1   | colorectal cancer associated 1                                  | mRNA   |
| chr17 | 82239443  | 82239483  | 10 | + | 44  | SLC16A3  | solute carrier family 16 member 3                               | mRNA   |
| chr16 | 68833852  | 68833897  | 10 | + | 47  | CDH1     | cadherin 1                                                      | mRNA   |
| chr11 | 65637385  | 65637417  | 10 | + | 51  | PCNX3    | pecanex 3                                                       | mRNA   |
| chr6  | 158632512 | 158632563 | 10 | + | 52  | TMEM181  | transmembrane protein 181                                       | mRNA   |
| chr1  | 111440983 | 111441032 | 10 | - | 52  | WDR77    | WD repeat domain 77                                             | mRNA   |
| chr7  | 16783676  | 16783727  | 10 | + | 54  | TSPAN13  | tetraspanin 13                                                  | mRNA   |
| chr14 | 50905263  | 50905299  | 10 | - | 54  | PYGL     | glycogen phosphorylase L                                        | mRNA   |
| chr11 | 102396443 | 102396491 | 10 | - | 55  | TMEM123  | transmembrane protein 123                                       | mRNA   |
| chr14 | 52640795  | 52640849  | 10 | - | 55  | ERO1A    | endoplasmic reticulum oxidoreductase 1 alpha                    | mRNA   |
| chr13 | 42320338  | 42320388  | 10 | + | 57  | AKAP11   | A kinase (PRKA) anchor protein 11                               | mRNA   |
| chr16 | 89914005  | 89914063  | 10 | + | 59  | MC1R     | Multi-pass membrane protein (By similarity)                     | mRNA   |
| chr5  | 141515877 | 141515910 | 10 | - | 60  | DIAPH1   | diaphanous related formin 1                                     | mRNA   |
| chr16 | 13239624  | 13239661  | 10 | + | 61  | SHISA9   | shisa family member 9                                           | mRNA   |
| chrX  | 118792292 | 118792341 | 10 | + | 63  | IL13RA1  | interleukin 13 receptor subunit alpha 1                         | mRNA   |
| chr1  | 225790028 | 225790090 | 10 | + | 63  | SRP9     | signal recognition particle 9                                   | mRNA   |
| chr17 | 15539083  | 15539135  | 10 | - | 63  | TVP23C   | trans-golgi network vesicle protein 23 homolog C                | mRNA   |
| chr10 | 71302762  | 71302818  | 10 | + | 65  | UNC5B    | unc-5 netrin receptor B                                         | mRNA   |
| chr17 | 39997846  | 39997907  | 10 | + | 66  | PSMD3    | proteasome 26S subunit                                          | mRNA   |
| chr8  | 127417532 | 127417595 | 10 | + | 66  | POU5F1B  | POU class 5 homeobox 1B                                         | mRNA   |
| chr13 | 79553688  | 79553739  | 10 | + | 67  | NDFIP2   | Nedd4 family interacting protein 2                              | mRNA   |
| chr8  | 53968046  | 53968112  | 10 | - | 67  | TCEA1    | transcription elongation factor A1                              | mRNA   |
| chr15 | 98963268  | 98963314  | 10 | + | 68  | IGF1R    | insulin like growth factor 1 receptor                           | mRNA   |
| chr15 | 98963319  | 98963335  | 10 | + | 68  | IGF1R    | insulin like growth factor 1 receptor                           | mRNA   |
| chr1  | 203741174 | 203741216 | 10 | + | 69  | ATP2B4   | ATPase plasma membrane Ca <sup>2+</sup> transporting 4          | mRNA   |
| chr19 | 36238579  | 36238623  | 10 | + | 70  | ZNF146   | zinc finger protein 146                                         | mRNA   |
| chr11 | 35809782  | 35809827  | 10 | + | 71  | TRIM44   | tripartite motif containing 44                                  | mRNA   |
| chr7  | 135928799 | 135928869 | 10 | - | 71  | MTPN     | myotrophin                                                      | mRNA   |
| chr12 | 79774028  | 79774059  | 10 | - | 74  | PPP1R12A | protein phosphatase 1 regulatory subunit 12A                    | mRNA   |
| chr9  | 112221257 | 112221296 | 10 | - | 74  | PTBP3    | polypyrimidine tract binding protein 3                          | mRNA   |
| chr9  | 112221297 | 112221330 | 10 | - | 74  | PTBP3    | polypyrimidine tract binding protein 3                          | mRNA   |
| chr5  | 139683824 | 139683862 | 10 | + | 74  | CXXC5    | CXXC finger protein 5                                           | mRNA   |
| chr10 | 103595477 | 103595545 | 10 | - | 75  | SH3PXD2A | SH3 and PX domains 2A                                           | mRNA   |
| chr7  | 44578998  | 44579045  | 10 | - | 76  | TMED4    | transmembrane p24 trafficking protein 4                         | mRNA   |
| chr2  | 219183045 | 219183120 | 10 | + | 76  | RETREG2  | reticulophagy regulator family member 2                         | mRNA   |
| chr2  | 28800356  | 28800416  | 10 | + | 77  | PPP1CB   | protein phosphatase 1 catalytic subunit beta                    | mRNA   |
| chr3  | 23920020  | 23920096  | 10 | + | 77  | RPL15    | ribosomal protein L15                                           | mRNA   |
| chr3  | 197782640 | 197782716 | 10 | + | 77  | FYTTD1   | forty-two-three domain containing 1,                            | mRNA   |
| chr1  | 26854728  | 26854793  | 10 | + | 78  | ZDHHC18  | zinc finger DHHC-type containing 18                             | mRNA   |
| chr6  | 121449220 | 121449242 | 10 | + | 79  | GJA1     | gap junction protein, alpha 1, 43kDa                            | mRNA   |
| chr8  | 18056471  | 18056500  | 10 | - | 79  | ASAH1    | N-acylsphingosine amidohydrolase 1                              | mRNA   |
| chr11 | 61802091  | 61802162  | 10 | - | 80  | FADS1    | fatty acid desaturase 1                                         | mRNA   |
| chr14 | 103137285 | 103137337 | 10 | + | 81  | TNFAIP2  | TNF alpha induced protein 2                                     | mRNA   |
| chr3  | 10150804  | 10150845  | 10 | + | 84  | VHL      | von Hippel-Lindau tumor suppressor, E3 ubiquitin protein ligase | mRNA   |
| chr5  | 72911366  | 72911447  | 10 | + | 85  | TNPO1    | transportin 1                                                   | mRNA   |
| chr16 | 57664938  | 57664983  | 10 | + | 85  | ADGRG1   | adhesion G protein-coupled receptor G1                          | mRNA   |
| chr3  | 98796216  | 98796256  | 10 | - | 86  | DCBLD2   | discoidin                                                       | mRNA   |
| chr4  | 105969765 | 105969828 | 10 | + | 86  | NPNT     | nephronectin                                                    | mRNA   |
| chr2  | 178505871 | 178505906 | 10 | + | 88  | PLEKHA3  | pleckstrin homology domain containing A3                        | mRNA   |
| chr1  | 234606473 | 234606561 | 10 | - | 89  | IRF2BP2  | interferon regulatory factor 2 binding protein 2                | mRNA   |
| chr6  | 47624749  | 47624798  | 10 | + | 89  | CD2AP    | CD2-associated protein                                          | mRNA   |
| chr7  | 140453975 | 140454054 | 10 | - | 92  | MKRN1    | makorin ring finger protein 1                                   | mRNA   |
| chr4  | 127721473 | 127721545 | 10 | + | 93  | INTU     | inturned planar cell polarity protein                           | mRNA   |
| chr1  | 24673052  | 24673097  | 10 | + | 98  | SRRM1    | serine and arginine repetitive matrix 1,                        | mRNA   |
| chr19 | 18279779  | 18279850  | 10 | - | 99  | JUND     | jun D proto-oncogene                                            | mRNA   |
| chr11 | 118751384 | 118751438 | 10 | - | 100 | DDX6     | DEAD-box helicase 6                                             | mRNA   |
| chr12 | 53479446  | 53479547  | 10 | + | 102 | PCBP2    | poly(rC) binding protein 2                                      | mRNA   |
| chr14 | 74904234  | 74904268  | 10 | + | 108 | RPS6KL1  | ribosomal protein S6 kinase like 1                              | mRNA   |
| chr2  | 214932104 | 214932195 | 10 | - | 113 | ABCA12   | ATP binding cassette subfamily A member 12                      | mRNA   |

Supplementary Table S4\_Specific Peaks bound to PURa in CLIP-seq\_PURa vs IgG

|       |           |           |    |   |     |            |                                                                           |               |
|-------|-----------|-----------|----|---|-----|------------|---------------------------------------------------------------------------|---------------|
| chr12 | 1787976   | 1788099   | 10 | + | 124 | ADIPOR2    | adiponectin receptor 2                                                    | mRNA          |
| chr1  | 156465700 | 156465776 | 10 | - | 131 | MEF2D      | myocyte enhancer factor 2D                                                | mRNA          |
| chr5  | 79325840  | 79325902  | 10 | + | 172 | JMY        | junction mediating and regulatory protein, p53 cofactor                   | mRNA          |
| chr2  | 46378708  | 46378732  | 9  | + | 41  | EPAS1      | endothelial PAS domain protein 1                                          | mRNA          |
| chr6  | 137204331 | 137204372 | 9  | - | 42  | IFNGR1     | interferon gamma receptor 1                                               | mRNA          |
| chr12 | 110339669 | 110339708 | 9  | + | 45  | ATP2A2     | ATPase sarcoplasmic/endoplasmic reticulum Ca <sup>2+</sup> transporting 2 | mRNA          |
| chr10 | 93401517  | 93401544  | 9  | - | 45  | MYOF       | myoferlin                                                                 | mRNA          |
| chr6  | 143502066 | 143502122 | 9  | - | 57  | FUCA2      | alpha-L-fucosidase 2                                                      | mRNA          |
| chr6  | 143502007 | 143502063 | 9  | - | 60  | FUCA2      | alpha-L-fucosidase 2                                                      | mRNA          |
| chr15 | 76947458  | 76947517  | 9  | + | 60  | RCN2       | reticulocalbin 2                                                          | mRNA          |
| chr13 | 25096985  | 25097032  | 9  | + | 62  | PABPC3     | poly(A) binding protein, cytoplasmic 3                                    | mRNA          |
| chr12 | 22062371  | 22062434  | 9  | + | 64  | CMAS       | cytidine monophosphate N-acetylneuraminic acid synthetase                 | mRNA          |
| chr10 | 74090097  | 74090121  | 9  | + | 100 | VCL        | vinculin                                                                  | mRNA          |
| chr2  | 61876943  | 61877052  | 9  | - | 110 | CCT4       | chaperonin containing TCP1 subunit 4                                      | mRNA          |
| chr4  | 108620579 | 108620600 | 9  | + | 25  | RPL34      | ribosomal protein L34                                                     | mRNA          |
| chr4  | 25200554  | 25200577  | 9  | - | 41  |            |                                                                           | no annotation |
| chr4  | 25200582  | 25200594  | 9  | - | 41  |            |                                                                           | no annotation |
| chr14 | 75271735  | 75271763  | 9  | - | 48  |            |                                                                           | no annotation |
| chr5  | 37795349  | 37795393  | 9  | - | 51  |            |                                                                           | no annotation |
| chr15 | 38140074  | 38140137  | 9  | + | 86  |            |                                                                           | no annotation |
| chr22 | 17070507  | 17070538  | 9  | + | 34  |            |                                                                           | no annotation |
| chr18 | 54269102  | 54269146  | 9  | - | 49  |            |                                                                           | no annotation |
| chr22 | 17027272  | 17027319  | 9  | - | 50  |            |                                                                           | no annotation |
| chr12 | 102237900 | 102237937 | 9  | + | 53  |            |                                                                           | no annotation |
| chr12 | 102296247 | 102296277 | 9  | + | 69  |            |                                                                           | no annotation |
| chr15 | 29760020  | 29760052  | 9  | + | 33  | TJP1       | tight junction protein 1                                                  | mRNA          |
| chr1  | 20775334  | 20775374  | 9  | - | 41  | HP1BP3     | heterochromatin protein 1 binding protein 3                               | mRNA          |
| chr6  | 63658799  | 63658842  | 9  | + | 48  | PHF3       | PHD finger protein 3                                                      | mRNA          |
| chr16 | 61725898  | 61725930  | 9  | + | 50  | CDH8       | cadherin 8                                                                | mRNA          |
| chr14 | 55136212  | 55136262  | 9  | + | 51  | LGALS3     | galectin 3                                                                | mRNA          |
| chr2  | 44229614  | 44229652  | 9  | + | 51  | PPM1B      | protein phosphatase, Mg <sup>2+</sup> /Mn <sup>2+</sup> dependent 1B      | mRNA          |
| chr3  | 185933815 | 185933863 | 9  | - | 51  | TRA2B      | Transformer-2 protein homolog beta                                        | mRNA          |
| chr4  | 15358478  | 15358528  | 9  | + | 53  | C1QTNF7    | C1q and TNF related 7                                                     | mRNA          |
| chr14 | 51644309  | 51644366  | 9  | - | 70  | FRMD6      | FERM domain containing 6                                                  | mRNA          |
| chr5  | 180809779 | 180809834 | 9  | - | 73  | MGAT1      | alpha-1,3-mannosyl-glycoprotein 2-beta-N-acetylglucosaminyltransferase    | mRNA          |
| chr13 | 106558199 | 106558231 | 9  | - | 81  | ARGLU1     | arginine and glutamate rich 1                                             | mRNA          |
| chr11 | 82914102  | 82914154  | 9  | + | 84  | DDIAS      | DNA damage induced apoptosis suppressor                                   | mRNA          |
| chr14 | 67938739  | 67938821  | 9  | + | 86  | RAD51B     | RAD51 paralog B                                                           | mRNA          |
| chr8  | 115552248 | 115552285 | 9  | - | 89  | TRPS1      | transcriptional repressor GATA binding 1                                  | mRNA          |
| chr2  | 169623034 | 169623091 | 9  | + | 93  | PP1G       | peptidylprolyl isomerase G                                                | mRNA          |
| chr17 | 47974808  | 47974861  | 9  | + | 94  | CDK5RAP3   | CDK5 regulatory subunit associated protein 3                              | mRNA          |
| chr1  | 110344017 | 110344093 | 9  | + | 103 | RBM15      | RNA binding motif protein 15                                              | mRNA          |
| chr15 | 79925284  | 79925331  | 9  | + | 56  | ST20-AS1   | ST20 antisense RNA 1                                                      | lncRNA        |
| chr2  | 80811844  | 80811893  | 9  | - | 57  | AC084193.1 |                                                                           | lncRNA        |
| chr8  | 119246699 | 119246751 | 9  | + | 70  | MAL2-AS1   |                                                                           | lncRNA        |
| chr2  | 101272936 | 101272974 | 9  | - | 48  | SNORD89    |                                                                           | snoRNA        |
| chr9  | 19063655  | 19063695  | 9  | - | 133 | SCARNA8    |                                                                           | scaRNA        |
| chr19 | 52389107  | 52389144  | 9  | + | 38  | ZNF528-AS1 |                                                                           | lncRNA        |
| chr4  | 7776352   | 7776390   | 9  | + | 63  | AFAP1-AS1  |                                                                           | lncRNA        |
| chrX  | 73802704  | 73802761  | 9  | + | 80  | TSIX       |                                                                           | lncRNA        |
| chr11 | 108368220 | 108368251 | 9  | + | 34  | ATM        | ATM serine/threonine kinase,                                              | mRNA          |
| chr1  | 150996217 | 150996252 | 9  | - | 36  | DHCR24     | 24-dehydrocholesterol reductase                                           | mRNA          |
| chr8  | 143655073 | 143655108 | 9  | + | 37  | ZNF623     | zinc finger protein 623                                                   | mRNA          |
| chr3  | 49533725  | 49533761  | 9  | + | 38  | DAG1       | dystroglycan 1                                                            | mRNA          |
| chr3  | 46669200  | 46669234  | 9  | + | 38  | ALS2CL     | ALS2 C-terminal like                                                      | mRNA          |
| chrX  | 24076799  | 24076839  | 9  | + | 41  | EIF2S3     | eukaryotic translation initiation factor 2 subunit gamma                  | mRNA          |
| chr5  | 1050407   | 1050448   | 9  | - | 42  | SLC12A7    | solute carrier family 12 member 7                                         | mRNA          |
| chr10 | 811232    | 811265    | 9  | - | 43  | LARP4B     | La ribonucleoprotein 4B                                                   | mRNA          |
| chr1  | 179918715 | 179918759 | 9  | + | 45  | TOR1AIP1   | torsin 1A interacting protein 1                                           | mRNA          |
| chr19 | 11783066  | 11783103  | 9  | - | 45  | ZNF441     | zinc finger protein 441                                                   | mRNA          |
| chr1  | 39004450  | 39004495  | 9  | + | 47  | AKIRIN1    | akirin 1                                                                  | mRNA          |
| chr19 | 42227864  | 42227909  | 9  | - | 47  | ZNF526     | zinc finger protein 526                                                   | mRNA          |
| chr1  | 156465657 | 156465698 | 9  | - | 48  | MEF2D      | myocyte enhancer factor 2D                                                | mRNA          |
| chr15 | 98963173  | 98963220  | 9  | + | 48  | IGF1R      | insulin like growth factor 1 receptor                                     | mRNA          |

Supplementary Table S4\_Specific Peaks bound to PURa in CLIP-seq\_PURa vs IgG

|       |           |           |   |   |     |                 |                                                                      |               |
|-------|-----------|-----------|---|---|-----|-----------------|----------------------------------------------------------------------|---------------|
| chr11 | 119118428 | 119118471 | 9 | + | 49  | C2CD2L          | C2CD2 like                                                           | mRNA          |
| chr6  | 73827914  | 73827960  | 9 | + | 49  | CD109           | CD109 molecule                                                       | mRNA          |
| chr7  | 6402532   | 6402580   | 9 | + | 49  | RAC1            | Rac family small GTPase 1                                            | mRNA          |
| chr12 | 133019474 | 133019517 | 9 | - | 49  | ZNF26           | zinc finger protein 26                                               | mRNA          |
| chr8  | 61625891  | 61625937  | 9 | - | 50  | ASPH            | aspartate beta-hydroxylase                                           | mRNA          |
| chr11 | 33354647  | 33354685  | 9 | + | 52  | HIPK3           | homeodomain interacting protein kinase 3                             | mRNA          |
| chr7  | 94668141  | 94668192  | 9 | + | 52  | PEG10           | paternally expressed 10                                              | mRNA          |
| chr16 | 2520097   | 2520145   | 9 | + | 53  | ATP6V0C         | ATPase H <sup>+</sup> transporting V0 subunit c                      | mRNA          |
| chr5  | 175959867 | 175959921 | 9 | - | 55  | THOC3           | THO complex 3                                                        | mRNA          |
| chr2  | 26135155  | 26135193  | 9 | + | 56  | RAB10           | RAB10, member RAS oncogene family                                    | mRNA          |
| chr5  | 172952382 | 172952438 | 9 | + | 57  | ERGIC1          | endoplasmic reticulum-golgi intermediate compartment 1               | mRNA          |
| chr1  | 43623527  | 43623584  | 9 | + | 58  | PTPRF           | protein tyrosine phosphatase receptor type F                         | mRNA          |
| chr1  | 153959176 | 153959233 | 9 | - | 58  | SLC39A1         | solute carrier family 39 member 1                                    | mRNA          |
| chr1  | 202891706 | 202891763 | 9 | - | 58  | KLHL12          | kelch like family member 12                                          | mRNA          |
| chr12 | 93506423  | 93506467  | 9 | + | 63  | MRPL42          | mitochondrial ribosomal protein L42                                  | mRNA          |
| chr19 | 44821367  | 44821414  | 9 | + | 64  | BCAM            | basal cell adhesion molecule (Lutheran blood group)                  | mRNA          |
| chr12 | 122769834 | 122769895 | 9 | + | 68  | DENR            | density regulated re-initiation and release factor                   | mRNA          |
| chr14 | 62109143  | 62109199  | 9 | + | 68  | SYT16           | synaptotagmin 16                                                     | mRNA          |
| chr16 | 15409930  | 15409986  | 9 | - | 69  | MPV17L          | MPV17 mitochondrial membrane protein-like                            | mRNA          |
| chr8  | 61502978  | 61503047  | 9 | - | 70  | ASPH            | aspartate beta-hydroxylase                                           | mRNA          |
| chr3  | 196829964 | 196830033 | 9 | + | 70  | PAK2            | p21 (RAC1) activated kinase 2                                        | mRNA          |
| chr1  | 16396082  | 16396129  | 9 | + | 70  | SZRD1           | SUZ RNA binding domain containing 1                                  | mRNA          |
| chr13 | 29509490  | 29509561  | 9 | - | 72  | SLC7A1          | solute carrier family 7 member 1                                     | mRNA          |
| chr17 | 68531254  | 68531325  | 9 | + | 74  | PRKAR1A         | protein kinase cAMP-dependent type I regulatory subunit alpha        | mRNA          |
| chr2  | 36548683  | 36548755  | 9 | + | 74  | CRIM1           | cysteine rich transmembrane BMP regulator 1                          | mRNA          |
| chr16 | 81386420  | 81386472  | 9 | + | 75  | GAN             | gigaxonin                                                            | mRNA          |
| chr20 | 45326979  | 45327053  | 9 | - | 75  | SDC4            | syndecan 4                                                           | mRNA          |
| chr19 | 13141054  | 13141121  | 9 | + | 76  | NACC1           | nucleus accumbens associated 1, BEN and BTB (POZ) domain containing  | mRNA          |
| chr13 | 42321747  | 42321822  | 9 | + | 76  | AKAP11          | A kinase (PRKA) anchor protein 11                                    | mRNA          |
| chr1  | 150265889 | 150265942 | 9 | - | 77  | APH1A           | aph-1 homolog A, gamma-secretase subunit                             | mRNA          |
| chr6  | 116495759 | 116495800 | 9 | + | 77  | TRAPPC3L        | trafficking protein particle complex 3 like                          | mRNA          |
| chr15 | 65577432  | 65577473  | 9 | - | 79  | HACD3           | 3-hydroxyacyl-CoA dehydratase 3                                      | mRNA          |
| chr4  | 98872828  | 98872910  | 9 | - | 83  | EIF4E           | eukaryotic translation initiation factor 4E                          | mRNA          |
| chr5  | 138507332 | 138507413 | 9 | - | 83  | ETF1            | eukaryotic translation termination factor 1                          | mRNA          |
| chr19 | 34227820  | 34227893  | 9 | + | 86  | LSM14A          | LSM14A mRNA processing body assembly factor                          | mRNA          |
| chr9  | 136440858 | 136440946 | 9 | - | 90  | SEC16A          | SEC16 homolog A, endoplasmic reticulum export factor                 | mRNA          |
| chr17 | 56938428  | 56938473  | 9 | - | 90  | COIL            | coilin                                                               | mRNA          |
| chr6  | 34417458  | 34417547  | 9 | - | 90  | RPS10           | ribosomal protein S10                                                | mRNA          |
| chr9  | 6532735   | 6532801   | 9 | - | 93  | GLDC            | glycine dehydrogenase (decarboxylating)                              | mRNA          |
| chr16 | 15411436  | 15411524  | 9 | - | 96  | MPV17L          | MPV17 mitochondrial membrane protein-like                            | mRNA          |
| chr3  | 42646832  | 42646928  | 9 | + | 97  | NKTR            | natural killer cell triggering receptor                              | mRNA          |
| chr21 | 31668576  | 31668638  | 9 | + | 104 | SOD1            | superoxide dismutase 1                                               | mRNA          |
| chr2  | 182781772 | 182781845 | 9 | + | 107 | DNAJC10         | DnaJ heat shock protein family (Hsp40) member C10                    | mRNA          |
| chr11 | 10307021  | 10307189  | 9 | + | 169 | ADM             | adrenomedullin                                                       | mRNA          |
| chr12 | 53446279  | 53446357  | 9 | + | 217 | PRR13           | proline rich 13                                                      | mRNA          |
| chr18 | 31524702  | 31524727  | 8 | + | 26  | DSG2            | desmoglein 2                                                         | mRNA          |
| chr14 | 102968328 | 102968358 | 8 | - | 32  | CDC42BPB        | CDC42 binding protein kinase beta                                    | mRNA          |
| chr7  | 128084811 | 128084847 | 8 | + | 37  | SND1            | staphylococcal nuclease and tudor domain containing 1                | mRNA          |
| chr7  | 128085710 | 128085746 | 8 | + | 39  | SND1            | staphylococcal nuclease and tudor domain containing 1                | mRNA          |
| chr1  | 88807737  | 88807775  | 8 | + | 45  | PKN2            | protein kinase N2                                                    | mRNA          |
| chr10 | 93402231  | 93402275  | 8 | - | 45  | MYOF            | myoferlin                                                            | mRNA          |
| chr3  | 128064876 | 128064885 | 8 | + | 60  | SEC61A1         | SEC61 translocon alpha 1 subunit                                     | mRNA          |
| chr2  | 44209283  | 44209325  | 8 | + | 61  | PPM1B           | protein phosphatase, Mg <sup>2+</sup> /Mn <sup>2+</sup> dependent 1B | mRNA          |
| chr19 | 36145805  | 36145859  | 8 | + | 71  | CAPNS1          | calpain small subunit 1                                              | mRNA          |
| chr15 | 58611031  | 58611107  | 8 | - | 77  | ADAM10          | ADAM metallopeptidase domain 10                                      | mRNA          |
| chr2  | 54631368  | 54631410  | 8 | + | 88  | SPTBN1          | spectrin beta, non-erythrocytic 1                                    | mRNA          |
| chr7  | 105110550 | 105110585 | 8 | - | 95  | KMT2E           | lysine methyltransferase 2E                                          | mRNA          |
| chr8  | 73293598  | 73293629  | 8 | - | 35  | RPL7            | ribosomal protein L7                                                 | mRNA          |
| chr16 | 69977075  | 69977109  | 8 | - | 167 | PDXDC2P-NPIP14P |                                                                      | pseudo        |
| chr7  | 54201561  | 54201593  | 8 | - | 33  |                 |                                                                      | no annotation |
| chr12 | 131292420 | 131292448 | 8 | + | 36  |                 |                                                                      | no annotation |
| chr9  | 66721325  | 66721371  | 8 | - | 53  |                 |                                                                      | no annotation |
| chr14 | 61657824  | 61657854  | 8 | - | 65  |                 |                                                                      | no annotation |
| chr12 | 102381991 | 102382052 | 8 | - | 68  |                 |                                                                      | no annotation |

Supplementary Table S4\_Specific Peaks bound to PURa in CLIP-seq\_PURa vs IgG

|       |           |           |   |   |     |              |                                                                    |               |
|-------|-----------|-----------|---|---|-----|--------------|--------------------------------------------------------------------|---------------|
| chr15 | 30345250  | 30345333  | 8 | + | 93  |              |                                                                    | no annotation |
| chr12 | 102244690 | 102244724 | 8 | + | 61  |              |                                                                    | no annotation |
| chr12 | 102237954 | 102237991 | 8 | + | 40  |              |                                                                    | no annotation |
| chr12 | 102309648 | 102309690 | 8 | + | 43  |              |                                                                    | no annotation |
| chr17 | 16786587  | 16786632  | 8 | + | 53  |              |                                                                    | no annotation |
| chr12 | 102288493 | 102288548 | 8 | + | 63  |              |                                                                    | no annotation |
| chr22 | 15303150  | 15303207  | 8 | - | 70  |              |                                                                    | no annotation |
| chr1  | 179544488 | 179544524 | 8 | - | 38  | AXDND1       | axonemal dynein light chain domain containing 1                    | mRNA          |
| chr22 | 46525532  | 46525569  | 8 | - | 40  | CELSR1       | cadherin EGF LAG seven-pass G-type receptor 1                      | mRNA          |
| chr9  | 123079550 | 123079587 | 8 | + | 41  | RABGAP1      | RAB GTPase activating protein 1                                    | mRNA          |
| chr14 | 51639142  | 51639177  | 8 | - | 41  | FRMD6        | FERM domain containing 6                                           | mRNA          |
| chr1  | 27670207  | 27670249  | 8 | + | 43  | IFI6         | interferon alpha inducible protein 6                               | mRNA          |
| chr3  | 131001366 | 131001412 | 8 | + | 47  | ATP2C1       | ATPase secretory pathway Ca2+ transporting 1                       | mRNA          |
| chr15 | 89591694  | 89591733  | 8 | - | 47  | TICRR        | TOPBP1 interacting checkpoint and replication regulator            | mRNA          |
| chr16 | 67007435  | 67007468  | 8 | + | 49  | CES4A        | carboxylesterase 4A                                                | mRNA          |
| chr22 | 25086411  | 25086460  | 8 | + | 51  | KIAA1671     | KIAA1671                                                           | mRNA          |
| chr16 | 10448627  | 10448678  | 8 | + | 52  | ATF7IP2      | activating transcription factor 7 interacting protein 2            | mRNA          |
| chr21 | 15794857  | 15794909  | 8 | + | 54  | USP25        | ubiquitin specific peptidase 25                                    | mRNA          |
| chr2  | 200890885 | 200890950 | 8 | + | 66  | NIF3L1       | NGG1 interacting factor 3 like 1                                   | mRNA          |
| chr7  | 158640350 | 158640384 | 8 | - | 67  | NCAPG2       | non-SMC condensin II complex subunit G2                            | mRNA          |
| chr6  | 16263090  | 16263149  | 8 | + | 76  | GMPR         | guanosine monophosphate reductase                                  | mRNA          |
| chr7  | 98304469  | 98304529  | 8 | - | 78  | BAIAP2L1     | BAR/IMD domain containing adaptor protein 2 like 1                 | mRNA          |
| chr18 | 3600204   | 3600249   | 8 | + | 91  | DLGAP1       | DLG associated protein 1                                           | mRNA          |
| chrX  | 85969516  | 85969564  | 8 | - | 148 | CHM          | CHM Rab escort protein                                             | mRNA          |
| chr17 | 35989759  | 35989793  | 8 | + | 35  | CCL15-CCL14  |                                                                    | lncRNA        |
| chr15 | 84199325  | 84199371  | 8 | - | 47  | LOC440300    |                                                                    | lncRNA        |
| chr3  | 163231300 | 163231351 | 8 | - | 56  | LINC01192    |                                                                    | lncRNA        |
| chr22 | 35167660  | 35167706  | 8 | - | 58  | LINC01399    | long intergenic non-protein coding RNA 1399                        | lncRNA        |
| chr2  | 104506633 | 104506667 | 8 | + | 63  | LINC01102    | long intergenic non-protein coding RNA 1102                        | lncRNA        |
| chr20 | 25677237  | 25677298  | 8 | - | 77  | ZNF337-AS1   |                                                                    | lncRNA        |
| chr22 | 35168130  | 35168193  | 8 | - | 80  | LINC01399    |                                                                    | lncRNA        |
| chr4  | 39593577  | 39593627  | 8 | - | 81  | UGDH-AS1     |                                                                    | lncRNA        |
| chrX  | 155487001 | 155487038 | 8 | - | 43  | TMLHE-AS1    |                                                                    | lncRNA        |
| chr15 | 84169504  | 84169556  | 8 | + | 56  | DNM1P41      |                                                                    | pseudo        |
| chr10 | 87845395  | 87845440  | 8 | + | 47  | CFL1P1       |                                                                    | pseudo        |
| chr7  | 76997565  | 76997611  | 8 | + | 87  | DTX2P1       |                                                                    | pseudo        |
| chr4  | 143973216 | 143973251 | 8 | + | 36  | LOC101927636 |                                                                    | lncRNA        |
| chr11 | 12059338  | 12059369  | 8 | + | 102 | LINC02547    |                                                                    | lncRNA        |
| chr13 | 27256537  | 27256568  | 8 | + | 32  | RPL21        | ribosomal protein L21                                              | mRNA          |
| chr6  | 122443563 | 122443592 | 8 | - | 32  | SERINC1      | serine incorporator 1                                              | mRNA          |
| chr17 | 37611993  | 37612022  | 8 | - | 34  | DDX52        | DEXD-box helicase 52                                               | mRNA          |
| chr2  | 60797730  | 60797762  | 8 | + | 34  | PAPOLG       | poly(A) polymerase gamma                                           | mRNA          |
| chr12 | 121185904 | 121185932 | 8 | + | 34  | P2RX7        | purinergic receptor P2X 7                                          | mRNA          |
| chr1  | 182383683 | 182383713 | 8 | - | 36  | GLUL         | glutamate-ammonia ligase                                           | mRNA          |
| chr1  | 248918944 | 248918975 | 8 | + | 36  | PGBD2        | piggyBac transposable element derived 2                            | mRNA          |
| chr20 | 3805940   | 3805975   | 8 | + | 36  | CDC25B       | cell division cycle 25B                                            | mRNA          |
| chr20 | 49096726  | 49096762  | 8 | + | 37  | CSE1L        | chromosome segregation 1 like                                      | mRNA          |
| chr1  | 65231288  | 65231323  | 8 | + | 40  | AK4          | adenylate kinase 4                                                 | mRNA          |
| chr9  | 136207332 | 136207371 | 8 | - | 40  | QSOX2        | quiescin sulfhydryl oxidase 2                                      | mRNA          |
| chr2  | 11181801  | 11181832  | 8 | + | 43  | ROCK2        | Rho associated coiled-coil containing protein kinase 2             | mRNA          |
| chr20 | 13820509  | 13820545  | 8 | - | 44  | NDUFAF5      | NADH:ubiquinone oxidoreductase complex assembly factor 5           | mRNA          |
| chr1  | 32042769  | 32042813  | 8 | + | 45  | KHDRBS1      | KH RNA binding domain containing, signal transduction associated 1 | mRNA          |
| chr17 | 1706573   | 1706617   | 8 | - | 45  | TLCD2        | TLC domain containing 2                                            | mRNA          |
| chr5  | 177065869 | 177065913 | 8 | + | 45  | ZNF346       | zinc finger protein 346                                            | mRNA          |
| chr6  | 106569242 | 106569284 | 8 | + | 45  | CRYBG1       | crystallin beta-gamma domain containing 1                          | mRNA          |
| chr6  | 115939663 | 115939708 | 8 | - | 46  | FRK          | fyn-related Src family tyrosine kinase                             | mRNA          |
| chr2  | 230819798 | 230819836 | 8 | + | 47  | CAB39        | calcium binding protein 39                                         | mRNA          |
| chr19 | 55230266  | 55230312  | 8 | - | 47  | PPP6R1       | protein phosphatase 6 regulatory subunit 1                         | mRNA          |
| chr11 | 34100012  | 34100060  | 8 | + | 49  | CAPRIN1      | cell cycle associated protein 1                                    | mRNA          |
| chr15 | 52548119  | 52548157  | 8 | - | 50  | ARPP19       | cAMP regulated phosphoprotein 19                                   | mRNA          |
| chr1  | 246767365 | 246767410 | 8 | + | 51  | SCCPDH       | saccharopine dehydrogenase (putative)                              | mRNA          |
| chr22 | 45843865  | 45843918  | 8 | + | 54  | ATXN10       | ataxin 10                                                          | mRNA          |
| chr6  | 36602729  | 36602782  | 8 | + | 54  | SRSF3        | serine and arginine rich splicing factor 3                         | mRNA          |
| chr3  | 101822293 | 101822335 | 8 | + | 55  | NXPE3        | neurexophilin and PC-esterase domain family member 3               | mRNA          |

Supplementary Table S4\_Specific Peaks bound to PURa in CLIP-seq\_PURa vs IgG

|       |           |           |   |   |     |          |                                                            |               |
|-------|-----------|-----------|---|---|-----|----------|------------------------------------------------------------|---------------|
| chr6  | 116495813 | 116495854 | 8 | + | 55  | TRAPPC3L | trafficking protein particle complex 3 like                | mRNA          |
| chr2  | 168773287 | 168773342 | 8 | + | 56  | CERS6    | ceramide synthase 6                                        | mRNA          |
| chr12 | 113390839 | 113390888 | 8 | - | 57  | PLBD2    | phospholipase B domain containing 2                        | mRNA          |
| chr6  | 115938997 | 115939033 | 8 | - | 58  | FRK      | fyn-related Src family tyrosine kinase                     | mRNA          |
| chr3  | 23980017  | 23980074  | 8 | + | 60  | NR1D2    | nuclear receptor subfamily 1 group D member 2              | mRNA          |
| chr17 | 4898001   | 4898032   | 8 | + | 60  | MINK1    | misshapen like kinase 1                                    | mRNA          |
| chr19 | 56527272  | 56527305  | 8 | - | 61  | ZNF471   | zinc finger protein 471                                    | mRNA          |
| chr10 | 87753780  | 87753820  | 8 | - | 63  | ATAD1    | ATPase family AAA domain containing 1                      | mRNA          |
| chr11 | 126202430 | 126202493 | 8 | - | 64  | RPUSD4   | RNA pseudouridine synthase D4                              | mRNA          |
| chr1  | 24471665  | 24471728  | 8 | + | 64  | NIPAL3   | NIPA like domain containing 3                              | mRNA          |
| chr5  | 43706851  | 43706910  | 8 | - | 64  | NNT      | nicotinamide nucleotide transhydrogenase                   | mRNA          |
| chr2  | 131147030 | 131147093 | 8 | + | 65  | PLEKHB2  | pleckstrin homology domain containing B2                   | mRNA          |
| chr3  | 123492064 | 123492135 | 8 | - | 72  | HACD2    | 3-hydroxyacyl-CoA dehydratase 2                            | mRNA          |
| chr11 | 77666058  | 77666097  | 8 | - | 72  | RSF1     | remodeling and spacing factor 1                            | mRNA          |
| chr17 | 44034749  | 44034788  | 8 | - | 73  | LSM12    | LSM12 homolog                                              | mRNA          |
| chr5  | 160252037 | 160252094 | 8 | - | 73  | CCNJL    | cyclin J like                                              | mRNA          |
| chr7  | 103099558 | 103099596 | 8 | + | 75  | ARMC10   | armadillo repeat containing 10                             | mRNA          |
| chr3  | 189895006 | 189895068 | 8 | + | 76  | TP63     | tumor protein p63                                          | mRNA          |
| chr7  | 152121967 | 152122033 | 8 | + | 76  | GALNT11  | polypeptide N-acetylgalactosaminyltransferase 11           | mRNA          |
| chr14 | 70325381  | 70325427  | 8 | - | 77  | COX16    | cytochrome c oxidase assembly factor COX16                 | mRNA          |
| chr1  | 149943729 | 149943794 | 8 | - | 77  | OTUD7B   | OTU deubiquitinase 7B                                      | mRNA          |
| chr18 | 216361    | 216397    | 8 | + | 79  | THOC1    | THO complex 1                                              | mRNA          |
| chr3  | 122571919 | 122571972 | 8 | + | 80  | DTX3L    | deltex E3 ubiquitin ligase 3L                              | mRNA          |
| chr15 | 97971300  | 97971368  | 8 | + | 81  | ARRDC4   | arrestin domain containing 4                               | mRNA          |
| chr16 | 67229427  | 67229500  | 8 | - | 84  | FHOD1    | formin homology 2 domain containing 1                      | mRNA          |
| chr1  | 89181876  | 89181913  | 8 | - | 89  | GBP4     | guanylate binding protein 4                                | mRNA          |
| chr3  | 123491987 | 123492060 | 8 | - | 89  | HACD2    | 3-hydroxyacyl-CoA dehydratase 2                            | mRNA          |
| chr4  | 138164912 | 138165011 | 8 | - | 100 | SLC7A11  | solute carrier family 7 member 11                          | mRNA          |
| chr22 | 19036392  | 19036417  | 8 | - | 100 | DGCR2    | DiGeorge syndrome critical region gene 2                   | mRNA          |
| chrX  | 54444959  | 54445002  | 8 | + | 103 | TSR2     | TSR2, 20S rRNA accumulation, homolog (S. cerevisiae)       | mRNA          |
| chr19 | 42377300  | 42377353  | 8 | + | 107 | MEGF8    | multiple EGF like domains 8                                | mRNA          |
| chr2  | 203427263 | 203427323 | 8 | + | 67  | ABI2     | abl interactor 2                                           | mRNA          |
| chr11 | 65624341  | 65624366  | 7 | + | 31  | PCNX3    | pecanex 3                                                  | mRNA          |
| chr10 | 42592910  | 42592948  | 7 | - | 40  | ZNF33B   | zinc finger protein 33B                                    | mRNA          |
| chr4  | 77048275  | 77048319  | 7 | - | 45  | CCNI     | cyclin I                                                   | mRNA          |
| chr14 | 31144212  | 31144257  | 7 | - | 46  | HECTD1   | HECT domain E3 ubiquitin protein ligase 1                  | mRNA          |
| chr4  | 39113019  | 39113059  | 7 | + | 55  | KLHL5    | kelch like family member 5                                 | mRNA          |
| chr7  | 112784576 | 112784620 | 7 | - | 62  | TMEM168  | transmembrane protein 168                                  | mRNA          |
| chr5  | 128112880 | 128112933 | 7 | + | 85  | SLC12A2  | solute carrier family 12 member 2                          | mRNA          |
| chr16 | 16379064  | 16379118  | 7 | + | 62  | NPIPA7   | nuclear pore complex interacting protein family, member A7 | mRNA          |
| chr14 | 19300749  | 19300790  | 7 | - | 44  | DUXAP10  |                                                            | pseudo        |
| chr12 | 102216103 | 102216145 | 7 | - | 54  |          |                                                            | no annotation |
| chr15 | 39419507  | 39419544  | 7 | + | 46  |          |                                                            | no annotation |
| chr22 | 31053459  | 31053503  | 7 | - | 50  |          |                                                            | no annotation |
| chr12 | 102254889 | 102254944 | 7 | - | 56  |          |                                                            | no annotation |
| chr4  | 104036786 | 104036820 | 7 | - | 85  |          |                                                            | no annotation |
| chr8  | 17811798  | 17811831  | 7 | + | 43  |          |                                                            | no annotation |
| chr4  | 40166741  | 40166767  | 7 | + | 27  |          |                                                            | no annotation |
| chr12 | 16695045  | 16695088  | 7 | + | 45  |          |                                                            | no annotation |
| chr22 | 21954186  | 21954215  | 7 | + | 48  |          |                                                            | no annotation |
| chr12 | 102254561 | 102254608 | 7 | + | 50  |          |                                                            | no annotation |
| chr11 | 83422633  | 83422664  | 7 | + | 53  |          |                                                            | no annotation |
| chr15 | 93720219  | 93720268  | 7 | - | 58  |          |                                                            | no annotation |
| chr2  | 210022925 | 210022994 | 7 | + | 75  |          |                                                            | no annotation |
| chr22 | 15304326  | 15304390  | 7 | - | 97  |          |                                                            | no annotation |
| chr6  | 3303281   | 3303312   | 7 | - | 32  | SLC22A23 | solute carrier family 22 member 23                         | mRNA          |
| chr2  | 219555449 | 219555482 | 7 | + | 34  | OBSL1    | obscurin like cytoskeletal adaptor 1                       | mRNA          |
| chr3  | 50101291  | 50101324  | 7 | + | 36  | RBM5     | RNA binding motif protein 5                                | mRNA          |
| chr12 | 4676051   | 4676086   | 7 | - | 36  | NDUFA9   | NADH:ubiquinone oxidoreductase subunit A9                  | mRNA          |
| chr15 | 45598094  | 45598129  | 7 | - | 36  | BLOC1S6  | biogenesis of lysosomal organelles complex 1 subunit 6     | mRNA          |
| chr2  | 61887742  | 61887777  | 7 | - | 37  | CCT4     | chaperonin containing TCPI subunit 4                       | mRNA          |
| chr16 | 67615430  | 67615460  | 7 | - | 38  | CTCF     | CCCTC-binding factor                                       | mRNA          |
| chr21 | 15063795  | 15063830  | 7 | - | 38  | NRIP1    | nuclear receptor interacting protein 1                     | mRNA          |
| chr15 | 72370508  | 72370541  | 7 | - | 43  | HEXA     | hexosaminidase subunit alpha                               | mRNA          |

Supplementary Table S4\_Specific Peaks bound to PURa in CLIP-seq\_PURa vs IgG

|       |           |           |   |   |    |            |                                                                          |        |
|-------|-----------|-----------|---|---|----|------------|--------------------------------------------------------------------------|--------|
| chr13 | 39044284  | 39044329  | 7 | + | 46 | NHLRC3     | NHL repeat containing 3                                                  | mRNA   |
| chrX  | 41649589  | 41649624  | 7 | + | 46 | CASK       | calcium/calmodulin dependent serine protein kinase                       | mRNA   |
| chr8  | 43063251  | 43063294  | 7 | + | 47 | FNTA       | farnesyltransferase                                                      | mRNA   |
| chr9  | 124528327 | 124528362 | 7 | - | 47 | NR6A1      | nuclear receptor subfamily 6 group A member 1                            | mRNA   |
| chr4  | 37952410  | 37952451  | 7 | - | 47 | TBC1D1     | TBC1 domain family member 1                                              | mRNA   |
| chr8  | 11319047  | 11319080  | 7 | - | 50 | MTMR9      | myotubularin related protein 9                                           | mRNA   |
| chr22 | 16978267  | 16978296  | 7 | - | 50 | GAB4       | GRB2 associated binding protein family member 4                          | mRNA   |
| chr17 | 81834199  | 81834240  | 7 | + | 51 | PPP1R27    | protein phosphatase 1, regulatory subunit 27                             | mRNA   |
| chr10 | 96134614  | 96134670  | 7 | + | 57 | ZNF518A    | zinc finger protein 518A                                                 | mRNA   |
| chr14 | 104704663 | 104704698 | 7 | - | 58 | INF2       | inverted formin, FH2 and WH2 domain containing                           | mRNA   |
| chr6  | 36503925  | 36503974  | 7 | - | 66 | STK38      | serine/threonine kinase 38                                               | mRNA   |
| chr1  | 120432693 | 120432759 | 7 | + | 67 | NBPF8      | NBPF member 8                                                            | mRNA   |
| chr1  | 186412028 | 186412093 | 7 | + | 70 | ODR4       | odr-4 GPCR localization factor homolog                                   | mRNA   |
| chr17 | 5431929   | 5431997   | 7 | - | 76 | RPAIN      | RPA interacting protein                                                  | mRNA   |
| chr12 | 50190182  | 50190232  | 7 | + | 80 | LIMA1      | LIM domain and actin binding 1                                           | mRNA   |
| chr1  | 65630324  | 65630354  | 7 | - | 83 | LEPR       | leptin receptor                                                          | mRNA   |
| chr14 | 19372541  | 19372573  | 7 | + | 33 | LINC01297  |                                                                          | lncRNA |
| chr3  | 18128406  | 18128442  | 7 | + | 38 | LOC339862  |                                                                          | lncRNA |
| chr3  | 54639500  | 54639541  | 7 | + | 42 | ESRG       |                                                                          | lncRNA |
| chr20 | 50318430  | 50318478  | 7 | - | 54 | LINC01271  | long intergenic non-protein coding RNA 1271                              | lncRNA |
| chr14 | 21397291  | 21397323  | 7 | - | 51 | SNORD8     |                                                                          | snoRNA |
| chr17 | 18538299  | 18538337  | 7 | + | 60 | CCDC144B   |                                                                          | pseudo |
| chr20 | 26209239  | 26209289  | 7 | - | 51 | MIR663AHG  |                                                                          | lncRNA |
| chr8  | 143745916 | 143745961 | 7 | + | 46 | FAM83H-AS1 |                                                                          | lncRNA |
| chr20 | 12951902  | 12951945  | 7 | + | 56 | LINC01722  |                                                                          | lncRNA |
| chr11 | 2635629   | 2635670   | 7 | + | 66 | KCNQ1OT1   |                                                                          | lncRNA |
| chr7  | 148989284 | 148989331 | 7 | - | 78 | GHET1      |                                                                          | lncRNA |
| chr13 | 29512648  | 29512679  | 7 | - | 32 | SLC7A1     | solute carrier family 7 member 1                                         | mRNA   |
| chr7  | 121350032 | 121350065 | 7 | - | 34 | FAM3C      | family with sequence similarity 3 member C                               | mRNA   |
| chr5  | 14696868  | 14696902  | 7 | + | 35 | OTULIN     | OTU deubiquitinase with linear linkage specificity                       | mRNA   |
| chr6  | 100858643 | 100858673 | 7 | - | 37 | ASCC3      | activating signal cointegrator 1 complex subunit 3                       | mRNA   |
| chr16 | 75474445  | 75474479  | 7 | + | 38 | CHST6      | carbohydrate sulfotransferase 6                                          | mRNA   |
| chr19 | 8509850   | 8509887   | 7 | + | 38 | ZNF414     | zinc finger protein 414                                                  | mRNA   |
| chr20 | 37983142  | 37983179  | 7 | + | 38 | TTI1       | TELO2 interacting protein 1                                              | mRNA   |
| chr6  | 89163800  | 89163837  | 7 | + | 39 | PM20D2     | peptidase M20 domain containing 2                                        | mRNA   |
| chr3  | 100180318 | 100180353 | 7 | - | 39 | CMSS1      | cms1 ribosomal small subunit homolog                                     | mRNA   |
| chr5  | 137752856 | 137752893 | 7 | - | 40 | HNRNPA0    | heterogeneous nuclear ribonucleoprotein A0                               | mRNA   |
| chr6  | 142444751 | 142444790 | 7 | + | 40 | ADGRG6     | adhesion G protein-coupled receptor G6                                   | mRNA   |
| chr10 | 119167785 | 119167821 | 7 | - | 41 | PRDX3      | peroxiredoxin 3                                                          | mRNA   |
| chr18 | 23531789  | 23531823  | 7 | - | 42 | RMC1       | regulator of MON1-CCZ1                                                   | mRNA   |
| chr7  | 40127229  | 40127264  | 7 | - | 42 | MPLKIP     | M-phase specific PLK1 interacting protein                                | mRNA   |
| chr7  | 93101045  | 93101079  | 7 | - | 42 | SAMD9      | sterile alpha motif domain containing 9                                  | mRNA   |
| chr6  | 34279776  | 34279818  | 7 | - | 43 | NUDT3      | nudix (nucleoside diphosphate linked moiety X)-type motif 3              | mRNA   |
| chr6  | 89162542  | 89162584  | 7 | + | 43 | PM20D2     | peptidase M20 domain containing 2                                        | mRNA   |
| chr9  | 19372740  | 19372783  | 7 | - | 44 | DENND4C    | DENN domain containing 4C                                                | mRNA   |
| chr1  | 15568691  | 15568733  | 7 | + | 45 | DNAJC16    | DnaJ heat shock protein family (Hsp40) member C16                        | mRNA   |
| chr8  | 22005656  | 22005701  | 7 | + | 46 | XPO7       | exportin 7                                                               | mRNA   |
| chr17 | 4143341   | 4143377   | 7 | - | 46 | CYB5D2     | cytochrome b5 domain containing 2                                        | mRNA   |
| chr3  | 100364704 | 100364751 | 7 | - | 48 | TOMM70A    | translocase of outer mitochondrial membrane 70 homolog A (S. cerevisiae) | mRNA   |
| chr3  | 188879816 | 188879858 | 7 | + | 48 | LPP        | LIM domain containing preferred translocation partner in lipoma          | mRNA   |
| chr7  | 116797014 | 116797063 | 7 | + | 50 | MET        | MET proto-oncogene, receptor tyrosine kinase                             | mRNA   |
| chr12 | 112508815 | 112508866 | 7 | + | 52 | PTPN11     | protein tyrosine phosphatase non-receptor type 11                        | mRNA   |
| chr14 | 74736482  | 74736516  | 7 | + | 53 | FCF1       | FCF1 rRNA-processing protein                                             | mRNA   |
| chr4  | 105969829 | 105969882 | 7 | + | 54 | NPNT       | nephronectin                                                             | mRNA   |
| chr1  | 32196831  | 32196871  | 7 | + | 55 | TXLNA      | taxilin alpha                                                            | mRNA   |
| chr14 | 105470559 | 105470612 | 7 | + | 55 | MTA1       | metastasis associated 1                                                  | mRNA   |
| chr11 | 63758621  | 63758673  | 7 | + | 55 | RTN3       | reticulon 3                                                              | mRNA   |
| chr6  | 158634269 | 158634310 | 7 | + | 57 | TMEM181    | transmembrane protein 181                                                | mRNA   |
| chr17 | 59110374  | 59110431  | 7 | - | 58 | SKA2       | spindle and kinetochore associated complex subunit 2                     | mRNA   |
| chr20 | 49096669  | 49096724  | 7 | + | 58 | CSE1L      | chromosome segregation 1 like                                            | mRNA   |
| chr1  | 11919679  | 11919734  | 7 | - | 59 | KIAA2013   | KIAA2013                                                                 | mRNA   |
| chr1  | 112671452 | 112671511 | 7 | + | 60 | CAPZA1     | capping actin protein of muscle Z-line subunit alpha 1                   | mRNA   |
| chr17 | 38323042  | 38323086  | 7 | + | 61 | MRPL45     | mitochondrial ribosomal protein L45                                      | mRNA   |
| chr12 | 92144041  | 92144098  | 7 | - | 61 | BTG1       | B-cell translocation gene 1, anti-proliferative                          | mRNA   |

Supplementary Table S4\_Specific Peaks bound to PURa in CLIP-seq\_PURa vs IgG

|       |           |           |   |   |     |             |                                                                         |               |
|-------|-----------|-----------|---|---|-----|-------------|-------------------------------------------------------------------------|---------------|
| chr9  | 131577725 | 131577756 | 7 | - | 62  | RAPGEF1     | Rap guanine nucleotide exchange factor 1                                | mRNA          |
| chr15 | 24683006  | 24683048  | 7 | - | 63  | NPAP1       | nuclear pore associated protein 1                                       | mRNA          |
| chr12 | 53188391  | 53188430  | 7 | + | 64  | ZNF740      | zinc finger protein 740                                                 | mRNA          |
| chr5  | 42721080  | 42721125  | 7 | + | 65  | GHR         | growth hormone receptor                                                 | mRNA          |
| chr5  | 102236582 | 102236647 | 7 | + | 66  | SLCO4C1     | solute carrier organic anion transporter family, member 4C1             | mRNA          |
| chr11 | 63624888  | 63624947  | 7 | - | 67  | ATL3        | atlastin GTPase 3                                                       | mRNA          |
| chr15 | 65887994  | 65888026  | 7 | + | 67  | RAB11A      | RAB11A, member RAS oncogene family                                      | mRNA          |
| chr1  | 23795484  | 23795513  | 7 | + | 68  | LYPLA2      | lysophospholipase 2                                                     | mRNA          |
| chr6  | 57008625  | 57008662  | 7 | - | 68  | BEND6       | BEN domain containing 6                                                 | mRNA          |
| chr5  | 97093596  | 97093627  | 7 | - | 70  | LIX1        | limb and CNS expressed 1                                                | mRNA          |
| chr2  | 182919665 | 182919715 | 7 | + | 73  | NCKAP1      | NCK associated protein 1                                                | mRNA          |
| chr12 | 93399922  | 93399969  | 7 | + | 75  | NUDT4       | nudix hydrolase 4                                                       | mRNA          |
| chr14 | 105479840 | 105479914 | 7 | + | 75  | CRIP2       | cysteine rich protein 2                                                 | mRNA          |
| chr16 | 13239078  | 13239126  | 7 | + | 78  | SHISA9      | shisa family member 9                                                   | mRNA          |
| chr14 | 75651177  | 75651218  | 7 | - | 80  | ERG28       | ergosterol biosynthesis 28 homolog                                      | mRNA          |
| chr12 | 6975857   | 6975938   | 7 | + | 86  | EMG1        | EMG1 N1-specific pseudouridine methyltransferase                        | mRNA          |
| chr16 | 4383271   | 4383336   | 7 | + | 88  | VASN        | vasorin                                                                 | mRNA          |
| chr17 | 39671905  | 39671976  | 7 | - | 91  | PGAP3       | post-GPI attachment to proteins phospholipase 3                         | mRNA          |
| chr1  | 92392077  | 92392153  | 7 | - | 97  | RPAP2       | RNA polymerase II associated protein 2                                  | mRNA          |
| chr19 | 10513307  | 10513360  | 7 | - | 105 | S1PR5       | sphingosine-1-phosphate receptor 5                                      | mRNA          |
| chr19 | 5691599   | 5691644   | 6 | + | 65  | RPL36       | ribosomal protein L36                                                   | mRNA          |
| chr8  | 73292688  | 73292797  | 6 | - | 110 | RPL7        | ribosomal protein L7                                                    | mRNA          |
| chr6  | 34425079  | 34425221  | 6 | - | 143 | RPS10       | ribosomal protein S10                                                   | mRNA          |
| chr6  | 34426031  | 34426069  | 6 | - | 39  | RPS10       | ribosomal protein S10                                                   | mRNA          |
| chr22 | 16614559  | 16614615  | 6 | - | 69  | TPTEP1      |                                                                         | pseudo        |
| chr16 | 31196746  | 31196772  | 6 | - | 29  |             |                                                                         | no annotation |
| chr4  | 25201072  | 25201110  | 6 | - | 40  |             |                                                                         | no annotation |
| chr8  | 26423724  | 26423756  | 6 | - | 46  |             |                                                                         | no annotation |
| chr21 | 44244752  | 44244795  | 6 | - | 48  |             |                                                                         | no annotation |
| chr3  | 858038    | 858085    | 6 | - | 48  |             |                                                                         | no annotation |
| chr17 | 41519354  | 41519394  | 6 | + | 49  |             |                                                                         | no annotation |
| chr12 | 102255959 | 102255983 | 6 | - | 57  |             |                                                                         | no annotation |
| chr11 | 86436637  | 86436664  | 6 | + | 28  |             |                                                                         | no annotation |
| chr8  | 36279422  | 36279451  | 6 | + | 38  |             |                                                                         | no annotation |
| chr2  | 38083263  | 38083302  | 6 | + | 40  |             |                                                                         | no annotation |
| chr4  | 121871988 | 121872029 | 6 | + | 42  |             |                                                                         | no annotation |
| chr12 | 102255245 | 102255290 | 6 | + | 47  |             |                                                                         | no annotation |
| chr17 | 45558630  | 45558671  | 6 | - | 61  |             |                                                                         | no annotation |
| chr22 | 15302844  | 15302891  | 6 | - | 75  |             |                                                                         | no annotation |
| chr19 | 48704195  | 48704208  | 6 | + | 69  | FUT2        | fucosyltransferase 2 (secretor status included)                         | mRNA          |
| chr14 | 50727603  | 50727628  | 6 | + | 31  | NIN         | ninein                                                                  | mRNA          |
| chr16 | 89740613  | 89740646  | 6 | - | 34  | ZNF276      | zinc finger protein 276                                                 | mRNA          |
| chr18 | 79967425  | 79967458  | 6 | + | 36  | HSBP1L1     | heat shock factor binding protein 1-like 1                              | mRNA          |
| chr22 | 17003836  | 17003870  | 6 | - | 36  | GAB4        | GRB2 associated binding protein family member 4                         | mRNA          |
| chr9  | 122874692 | 122874722 | 6 | + | 37  | RC3H2       | ring finger and CCCH-type domains 2                                     | mRNA          |
| chr17 | 63746922  | 63746961  | 6 | - | 40  | CCDC47      | coiled-coil domain containing 47                                        | mRNA          |
| chr3  | 167692439 | 167692469 | 6 | - | 41  | PDCD10      | programmed cell death 10                                                | mRNA          |
| chr19 | 44095039  | 44095082  | 6 | + | 44  | ZNF224      | zinc finger protein 224                                                 | mRNA          |
| chr12 | 20860261  | 20860303  | 6 | + | 45  | SLCO1B3     | solute carrier organic anion transporter family member 1B3              | mRNA          |
| chr2  | 207531487 | 207531522 | 6 | + | 46  | CREB1       | cAMP responsive element binding protein 1                               | mRNA          |
| chr12 | 131712611 | 131712658 | 6 | + | 51  | SFSWAP      | splicing factor SWAP                                                    | mRNA          |
| chr2  | 138568445 | 138568490 | 6 | + | 52  | SPOPL       | speckle type BTB/POZ protein like                                       | mRNA          |
| chr9  | 87918949  | 87918993  | 6 | + | 52  | SPATA31C1   | SPATA31 subfamily C member 1                                            | mRNA          |
| chr2  | 229180778 | 229180825 | 6 | - | 54  | PID1        | phosphotyrosine interaction domain containing 1                         | mRNA          |
| chr6  | 111311973 | 111312007 | 6 | + | 55  | REV3L       | REV3 like, DNA directed polymerase zeta catalytic subunit               | mRNA          |
| chr8  | 11782698  | 11782739  | 6 | + | 67  | NEIL2       | nei like DNA glycosylase 2                                              | mRNA          |
| chr2  | 3515579   | 3515629   | 6 | + | 67  | ADI1        | acireductone dioxygenase 1                                              | mRNA          |
| chr5  | 45575681  | 45575744  | 6 | - | 68  | HCN1        | hyperpolarization activated cyclic nucleotide gated potassium channel 1 | mRNA          |
| chr2  | 210026515 | 210026563 | 6 | + | 69  | KANSL1L     | KAT8 regulatory NSL complex subunit 1 like                              | mRNA          |
| chr14 | 64523597  | 64523673  | 6 | + | 77  | ZBTB1       | zinc finger and BTB domain containing 1                                 | mRNA          |
| chr8  | 79956616  | 79956675  | 6 | + | 79  | MRPS28      | mitochondrial ribosomal protein S28                                     | mRNA          |
| chr2  | 111237180 | 111237211 | 6 | + | 35  | MIR4435-2HG |                                                                         | lncRNA        |
| chr10 | 43940445  | 43940479  | 6 | + | 39  | LINC00841   |                                                                         | lncRNA        |
| chrX  | 3821717   | 3821763   | 6 | + | 47  | LOC389906   |                                                                         | lncRNA        |

Supplementary Table S4\_Specific Peaks bound to PURa in CLIP-seq\_PURa vs IgG

|       |           |           |   |   |     |              |                                                                          |               |
|-------|-----------|-----------|---|---|-----|--------------|--------------------------------------------------------------------------|---------------|
| chr2  | 14230625  | 14230661  | 6 | + | 37  | LINC00276    |                                                                          | lncRNA        |
| chr17 | 12636408  | 12636441  | 6 | + | 44  | LINC00670    |                                                                          | lncRNA        |
| chr3  | 54638648  | 54638693  | 6 | - | 46  | ESRG         |                                                                          | lncRNA        |
| chr4  | 14473558  | 14473593  | 6 | + | 49  | LINC00504    |                                                                          | lncRNA        |
| chr2  | 25039155  | 25039202  | 6 | - | 50  | DNAJC27-AS1  |                                                                          | lncRNA        |
| chr8  | 65527040  | 65527089  | 6 | + | 50  | LINC01299    |                                                                          | lncRNA        |
| chr5  | 23980449  | 23980481  | 6 | - | 57  | C5orf17      |                                                                          | lncRNA        |
| chr2  | 66391967  | 66392005  | 6 | - | 61  | LINC01873    |                                                                          | lncRNA        |
| chr2  | 66392061  | 66392149  | 6 | + | 127 | LINC01873    |                                                                          | lncRNA        |
| chr3  | 98981334  | 98981356  | 6 | + | 24  | LINC00973    |                                                                          | lncRNA        |
| chr12 | 49293965  | 49294006  | 6 | + | 42  | LOC101927267 |                                                                          | lncRNA        |
| chr3  | 179398456 | 179398465 | 6 | + | 10  | GNB4         | G protein subunit beta 4                                                 | mRNA          |
| chr3  | 179397901 | 179397922 | 6 | + | 22  | GNB4         | G protein subunit beta 4                                                 | mRNA          |
| chr4  | 40157068  | 40157092  | 6 | - | 26  | N4BP2        | NEDD4 binding protein 2                                                  | mRNA          |
| chr21 | 37612709  | 37612736  | 6 | - | 28  | KCNJ6        | potassium channel, inwardly rectifying subfamily J, member 6             | mRNA          |
| chrX  | 55181518  | 55181547  | 6 | - | 30  | MTRNR2L10    | MT-RNR2-like 10                                                          | mRNA          |
| chr13 | 51763565  | 51763596  | 6 | + | 34  | WDFY2        | WD repeat and FYVE domain containing 2                                   | mRNA          |
| chr19 | 6663293   | 6663321   | 6 | + | 34  | TNFSF14      | TNF superfamily member 14                                                | mRNA          |
| chr11 | 74978533  | 74978567  | 6 | - | 35  | SPCS2        | signal peptidase complex subunit 2                                       | mRNA          |
| chr11 | 74978583  | 74978617  | 6 | - | 36  | SPCS2        | signal peptidase complex subunit 2                                       | mRNA          |
| chr19 | 5891423   | 5891455   | 6 | + | 37  | NDUFA11      | NADH:ubiquinone oxidoreductase subunit A11                               | mRNA          |
| chr14 | 102498851 | 102498881 | 6 | - | 38  | TECPR2       | tectonin beta-propeller repeat containing 2                              | mRNA          |
| chr1  | 92398298  | 92398332  | 6 | - | 40  | RPAP2        | RNA polymerase II associated protein 2                                   | mRNA          |
| chr5  | 116446245 | 116446283 | 6 | + | 41  | SEMA6A       | semaphorin 6A                                                            | mRNA          |
| chr10 | 73498442  | 73498478  | 6 | + | 44  | USP54        | ubiquitin specific peptidase 54                                          | mRNA          |
| chr1  | 25861979  | 25862022  | 6 | - | 45  | PAQR7        | progesterin and adipoQ receptor family member VII                        | mRNA          |
| chr3  | 119669577 | 119669621 | 6 | - | 45  | COX17        | cytochrome c oxidase copper chaperone COX17                              | mRNA          |
| chrX  | 18239825  | 18239865  | 6 | - | 45  | SCML2        | Scm polycomb group protein like 2                                        | mRNA          |
| chr11 | 74977220  | 74977267  | 6 | + | 48  | SPCS2        | signal peptidase complex subunit 2                                       | mRNA          |
| chr11 | 118354501 | 118354549 | 6 | + | 50  | CD3G         | CD3G molecule                                                            | mRNA          |
| chr7  | 16783844  | 16783895  | 6 | + | 52  | TSPAN13      | tetraspanin 13                                                           | mRNA          |
| chr7  | 66955634  | 66955677  | 6 | + | 52  | TMEM248      | transmembrane protein 248                                                | mRNA          |
| chr3  | 48443876  | 48443927  | 6 | + | 52  | TMA7         | translation machinery associated 7 homolog (S. cerevisiae)               | mRNA          |
| chr1  | 156525789 | 156525818 | 6 | - | 53  | IQGAP3       | IQ motif containing GTPase activating protein 3                          | mRNA          |
| chr16 | 19268116  | 19268171  | 6 | + | 56  | SYT17        | synaptotagmin 17                                                         | mRNA          |
| chrX  | 68042594  | 68042640  | 6 | - | 56  | OPHN1        | oligophrenin 1                                                           | mRNA          |
| chr11 | 791193    | 791248    | 6 | - | 56  | SLC25A22     | solute carrier family 25 member 22                                       | mRNA          |
| chr6  | 122781910 | 122781946 | 6 | + | 56  | FABP7        | fatty acid binding protein 7                                             | mRNA          |
| chr3  | 9806475   | 9806516   | 6 | + | 59  | ARPC4        | actin related protein 2/3 complex subunit 4                              | mRNA          |
| chr7  | 2442107   | 2442162   | 6 | + | 59  | CHST12       | carbohydrate (chondroitin 4) sulfotransferase 12                         | mRNA          |
| chr12 | 32645444  | 32645489  | 6 | - | 59  | FGD4         | FYVE, RhoGEF and PH domain containing 4                                  | mRNA          |
| chr19 | 5152862   | 5152922   | 6 | - | 63  | KDM4B        | lysine demethylase 4B                                                    | mRNA          |
| chr4  | 106043726 | 106043777 | 6 | + | 63  | TBCK         | TBC1 domain containing kinase                                            | mRNA          |
| chr1  | 113975978 | 113976015 | 6 | + | 64  | HIPK1        | homeodomain interacting protein kinase 1                                 | mRNA          |
| chr17 | 74593815  | 74593868  | 6 | - | 64  | C17orf77     | chromosome 17 open reading frame 77                                      | mRNA          |
| chr2  | 231400978 | 231401028 | 6 | + | 67  | B3GNT7       | UDP-GlcNAc:betaGal beta-1,3-N-acetylglucosaminyltransferase 7            | mRNA          |
| chr2  | 70296704  | 70296738  | 6 | - | 70  | FAM136A      | family with sequence similarity 136 member A                             | mRNA          |
| chr3  | 100364805 | 100364874 | 6 | - | 70  | TOMM70A      | translocase of outer mitochondrial membrane 70 homolog A (S. cerevisiae) | mRNA          |
| chr6  | 89643415  | 89643490  | 6 | - | 77  | MDN1         | midasin AAA ATPase 1                                                     | mRNA          |
| chr13 | 36224964  | 36224980  | 6 | - | 50  | CCDC169      | coiled-coil domain containing 169                                        | mRNA          |
| chr20 | 326541    | 326564    | 5 | - | 25  | SOX12        | SRY-box transcription factor 12                                          | mRNA          |
| chr15 | 44533935  | 44533958  | 5 | + | 27  |              |                                                                          | no annotation |
| chr10 | 89667554  | 89667580  | 5 | + | 28  |              |                                                                          | no annotation |
| chr22 | 36072459  | 36072491  | 5 | - | 33  |              |                                                                          | no annotation |
| chr3  | 120136487 | 120136522 | 5 | - | 36  |              |                                                                          | no annotation |
| chr5  | 21616500  | 21616534  | 5 | - | 36  |              |                                                                          | no annotation |
| chr10 | 116583182 | 116583221 | 5 | - | 40  |              |                                                                          | no annotation |
| chr16 | 35227634  | 35227675  | 5 | - | 42  |              |                                                                          | no annotation |
| chr18 | 27336954  | 27336994  | 5 | + | 43  |              |                                                                          | no annotation |
| chr15 | 46804716  | 46804755  | 5 | - | 48  |              |                                                                          | no annotation |
| chr2  | 63642694  | 63642740  | 5 | + | 48  |              |                                                                          | no annotation |
| chr6  | 36158467  | 36158517  | 5 | + | 52  |              |                                                                          | no annotation |
| chr2  | 46778993  | 46779027  | 5 | - | 53  |              |                                                                          | no annotation |
| chr6  | 94447121  | 94447147  | 5 | - | 27  |              |                                                                          | no annotation |



Supplementary Table S4\_Specific Peaks bound to PURa in CLIP-seq\_PURa vs IgG

|       |           |           |   |   |    |              |                                                                        |               |
|-------|-----------|-----------|---|---|----|--------------|------------------------------------------------------------------------|---------------|
| chr1  | 92189833  | 92189852  | 5 | + | 32 |              |                                                                        | no annotation |
| chr12 | 132913451 | 132913486 | 5 | + | 36 |              |                                                                        | no annotation |
| chr16 | 24472951  | 24472987  | 5 | - | 38 |              |                                                                        | no annotation |
| chr5  | 100053503 | 100053539 | 5 | - | 53 |              |                                                                        | no annotation |
| chr20 | 3243347   | 3243382   | 5 | + | 61 |              |                                                                        | no annotation |
| chr5  | 112164624 | 112164647 | 5 | + | 27 | EPB41L4A     | erythrocyte membrane protein band 4.1 like 4A                          | mRNA          |
| chr20 | 53398567  | 53398594  | 5 | - | 28 | TSHZ2        | teashirt zinc finger homeobox 2                                        | mRNA          |
| chr11 | 88322110  | 88322139  | 5 | + | 33 | CTSC         | cathepsin C                                                            | mRNA          |
| chr12 | 122020317 | 122020339 | 5 | - | 34 | BCL7A        | B-cell CLL/lymphoma 7 protein family member A                          | mRNA          |
| chr11 | 117907881 | 117907907 | 5 | + | 35 | TMPRSS13     | transmembrane serine protease 13                                       | mRNA          |
| chr17 | 75263693  | 75263722  | 5 | - | 35 | MRPS7        | mitochondrial ribosomal protein S7                                     | mRNA          |
| chr12 | 65954995  | 65955027  | 5 | - | 36 | HMGA2        | high mobility group AT-hook 2                                          | mRNA          |
| chr7  | 102352533 | 102352569 | 5 | + | 39 | SPDYE6       | speedy/RINGO cell cycle regulator family member E6                     | mRNA          |
| chr11 | 13394774  | 13394813  | 5 | + | 41 | BTBD10       | BTB domain containing 10                                               | mRNA          |
| chr18 | 37075575  | 37075611  | 5 | - | 42 | KIAA1328     | KIAA1328                                                               | mRNA          |
| chr9  | 33347912  | 33347951  | 5 | - | 48 | NFX1         | nuclear transcription factor, X-box binding 1                          | mRNA          |
| chr11 | 31574770  | 31574792  | 5 | - | 50 | ELP4         | elongator acetyltransferase complex subunit 4                          | mRNA          |
| chr2  | 30606984  | 30607016  | 5 | - | 51 | LCLAT1       | lysocardiolipin acyltransferase 1                                      | mRNA          |
| chr19 | 9813350   | 9813399   | 5 | + | 52 | FBXL12       | F-box and leucine rich repeat protein 12                               | mRNA          |
| chr16 | 3051190   | 3051236   | 5 | + | 53 | MMP25        | matrix metalloproteinase 25                                            | mRNA          |
| chr8  | 30176792  | 30176824  | 5 | - | 54 | DCTN6        | dynactin subunit 6                                                     | mRNA          |
| chr14 | 105370527 | 105370557 | 5 | - | 61 | PACS2        | phosphofurin acidic cluster sorting protein 2                          | mRNA          |
| chr15 | 45598164  | 45598221  | 5 | - | 65 | BLOC1S6      | biogenesis of lysosomal organelles complex 1 subunit 6                 | mRNA          |
| chr18 | 80012968  | 80013039  | 5 | + | 72 | TXNL4A       | thioredoxin like 4A                                                    | mRNA          |
| chr1  | 64106265  | 64106302  | 5 | + | 58 | ROR1-AS1     |                                                                        | lncRNA        |
| chr1  | 211433837 | 211433894 | 5 | - | 58 | LINC00467    |                                                                        | lncRNA        |
| chr3  | 49551111  | 49551154  | 5 | + | 63 | BSN-AS2      | BSN antisense RNA 2 (head to head)                                     | lncRNA        |
| chr17 | 18538293  | 18538337  | 5 | - | 69 | CCDC144B     |                                                                        | pseudo        |
| chrX  | 73803732  | 73803772  | 5 | + | 42 | TSIX         |                                                                        | lncRNA        |
| chr11 | 67603487  | 67603521  | 5 | - | 43 | C11orf72     |                                                                        | lncRNA        |
| chr7  | 23102490  | 23102532  | 5 | - | 44 | KLHL7-DT     |                                                                        | lncRNA        |
| chr17 | 76805633  | 76805676  | 5 | + | 45 | LINC02080    |                                                                        | lncRNA        |
| chrX  | 73804503  | 73804542  | 5 | + | 45 | TSIX         |                                                                        | lncRNA        |
| chr17 | 12636774  | 12636810  | 5 | - | 83 | LINC00670    |                                                                        | lncRNA        |
| chr7  | 116276599 | 116276634 | 5 | + | 41 | LOC102724434 |                                                                        | lncRNA        |
| chr19 | 48705316  | 48705336  | 5 | + | 21 | FUT2         | fucosyltransferase 2 (secretor status included)                        | mRNA          |
| chr1  | 114705771 | 114705791 | 5 | + | 21 | NRAS         | neuroblastoma RAS viral (v-ras) oncogene homolog                       | mRNA          |
| chr9  | 6506525   | 6506550   | 5 | - | 26 | UHRF2        | ubiquitin like with PHD and ring finger domains 2                      | mRNA          |
| chr5  | 1222584   | 1222611   | 5 | + | 28 | SLC6A19      | solute carrier family 6 member 19                                      | mRNA          |
| chr11 | 8687216   | 8687244   | 5 | - | 32 | RPL27A       | ribosomal protein L27a                                                 | mRNA          |
| chr8  | 55524598  | 55524629  | 5 | - | 32 | XKR4         | XK, Kell blood group complex subunit-related family, member 4          | mRNA          |
| chr9  | 34368301  | 34368330  | 5 | + | 32 | MYORG        | myogenesis regulating glycosidase                                      | mRNA          |
| chr18 | 32070211  | 32070238  | 5 | + | 34 | RNF125       | ring finger protein 125                                                | mRNA          |
| chr11 | 2131835   | 2131859   | 5 | + | 34 | IGF2         | insulin like growth factor 2                                           | mRNA          |
| chr12 | 49273904  | 49273938  | 5 | - | 35 | TUBA1C       | tubulin alpha 1c                                                       | mRNA          |
| chr14 | 90526103  | 90526134  | 5 | + | 35 | TTC7B        | tetratricopeptide repeat domain 7B                                     | mRNA          |
| chr1  | 160216297 | 160216332 | 5 | + | 36 | DCAF8        | DDB1 and CUL4 associated factor 8                                      | mRNA          |
| chr1  | 226226432 | 226226463 | 5 | + | 37 | MIXL1        | Mix paired-like homeobox                                               | mRNA          |
| chr4  | 69723810  | 69723846  | 5 | - | 37 | SULT1B1      | sulfotransferase family 1B member 1                                    | mRNA          |
| chrX  | 107064741 | 107064770 | 5 | + | 37 | RBM41        | RNA binding motif protein 41                                           | mRNA          |
| chr5  | 144478901 | 144478938 | 5 | + | 38 | KCTD16       | potassium channel tetramerization domain containing 16                 | mRNA          |
| chr19 | 48600823  | 48600853  | 5 | + | 39 | FAM83E       | family with sequence similarity 83, member E                           | mRNA          |
| chr3  | 49415495  | 49415520  | 5 | - | 41 | TCTA         | T-cell leukemia translocation altered                                  | mRNA          |
| chr7  | 152647040 | 152647080 | 5 | + | 42 | XRCC2        | X-ray repair complementing defective repair in Chinese hamster cells 2 | mRNA          |
| chr21 | 38301939  | 38301970  | 5 | - | 43 | KCNJ15       | potassium inwardly rectifying channel subfamily J member 15            | mRNA          |
| chr5  | 77431335  | 77431374  | 5 | + | 43 | WDR41        | WD repeat domain 41                                                    | mRNA          |
| chr7  | 152647457 | 152647499 | 5 | + | 43 | XRCC2        | X-ray repair complementing defective repair in Chinese hamster cells 2 | mRNA          |
| chr7  | 13892750  | 13892794  | 5 | + | 45 | ETV1         | ETS variant transcription factor 1                                     | mRNA          |
| chr19 | 52293131  | 52293169  | 5 | + | 46 | ZNF766       | zinc finger protein 766                                                | mRNA          |
| chr3  | 101225399 | 101225435 | 5 | - | 47 | IMPG2        | interphotoreceptor matrix proteoglycan 2                               | mRNA          |
| chrX  | 16763105  | 16763151  | 5 | - | 47 | SYAP1        | synapse associated protein 1                                           | mRNA          |
| chr12 | 113390317 | 113390364 | 5 | - | 48 | PLBD2        | phospholipase B domain containing 2                                    | mRNA          |
| chr16 | 4383339   | 4383388   | 5 | + | 50 | VASN         | vasorin                                                                | mRNA          |
| chr9  | 21330118  | 21330162  | 5 | + | 50 | KLHL9        | kelch-like family member 9                                             | mRNA          |

Supplementary Table S4\_Specific Peaks bound to PURa in CLIP-seq\_PURa vs IgG

|       |           |           |   |   |     |               |                                                          |               |
|-------|-----------|-----------|---|---|-----|---------------|----------------------------------------------------------|---------------|
| chr13 | 30205606  | 30205661  | 5 | + | 56  | KATNAL1       | katanin catalytic subunit A1 like 1                      | mRNA          |
| chr17 | 28327136  | 28327188  | 5 | + | 58  | TMEM97        | transmembrane protein 97                                 | mRNA          |
| chr7  | 2437712   | 2437767   | 5 | - | 64  | CHST12        | carbohydrate (chondroitin 4) sulfotransferase 12         | mRNA          |
| chr9  | 88575483  | 88575547  | 5 | - | 65  | NXNL2         | nucleoredoxin like 2                                     | mRNA          |
| chr5  | 161289773 | 161289836 | 5 | + | 66  | GABRB2        | gamma-aminobutyric acid type A receptor beta2 subunit    | mRNA          |
| chr1  | 92389543  | 92389602  | 5 | - | 68  | RPAP2         | RNA polymerase II associated protein 2                   | mRNA          |
| chrX  | 70063837  | 70063867  | 5 | - | 72  | OTUD6A        | OTU deubiquitinase 6A                                    | mRNA          |
| chr4  | 69724204  | 69724248  | 5 | - | 78  | SULT1B1       | sulfotransferase family 1B member 1                      | mRNA          |
| chr1  | 53084875  | 53084907  | 5 | - | 33  | PODN          | podocan                                                  | mRNA          |
| chr1  | 161037684 | 161037733 | 5 | - | 73  | TSTD1         | thiosulfate sulfurtransferase like domain containing 1   | mRNA          |
| chr5  | 96729712  | 96729725  | 4 | - | 15  | CAST          | calpastatin                                              | mRNA          |
| chr5  | 96730779  | 96730790  | 4 | - | 15  | CAST          | calpastatin                                              | mRNA          |
| chr19 | 50637895  | 50637920  | 4 | - | 26  | SYT3          | synaptotagmin 3                                          | mRNA          |
| chr8  | 36279419  | 36279444  | 4 | - | 34  | MTND6P19      |                                                          | pseudo        |
| chr2  | 2838279   | 2838301   | 4 | + | 23  |               |                                                          | no annotation |
| chr1  | 44150659  | 44150686  | 4 | + | 29  |               |                                                          | no annotation |
| chr2  | 63642547  | 63642578  | 4 | + | 32  |               |                                                          | no annotation |
| chr2  | 190537934 | 190537965 | 4 | - | 35  |               |                                                          | no annotation |
| chr1  | 630717    | 630754    | 4 | + | 101 |               |                                                          | no annotation |
| chr5  | 99997839  | 99997859  | 4 | + | 21  |               |                                                          | no annotation |
| chr22 | 37892360  | 37892385  | 4 | + | 30  |               |                                                          | no annotation |
| chr3  | 147941746 | 147941773 | 4 | + | 30  |               |                                                          | no annotation |
| chr7  | 130791545 | 130791577 | 4 | + | 33  |               |                                                          | no annotation |
| chr12 | 12649500  | 12649537  | 4 | + | 38  |               |                                                          | no annotation |
| chr16 | 21863789  | 21863831  | 4 | - | 43  |               |                                                          | no annotation |
| chr17 | 47049059  | 47049107  | 4 | + | 50  |               |                                                          | no annotation |
| chr22 | 36080492  | 36080535  | 4 | + | 72  |               |                                                          | no annotation |
| chr4  | 67731600  | 67731645  | 4 | - | 75  |               |                                                          | no annotation |
| chr16 | 4839267   | 4839292   | 4 | + | 27  | GLYR1         | glyoxylate reductase 1 homolog                           | mRNA          |
| chr19 | 6717633   | 6717659   | 4 | + | 30  | C3            | complement C3                                            | mRNA          |
| chr19 | 6717661   | 6717690   | 4 | + | 30  | C3            | complement C3                                            | mRNA          |
| chr1  | 18858431  | 18858462  | 4 | - | 32  | TAS1R2        | taste receptor, type 1, member 2                         | mRNA          |
| chr17 | 14328815  | 14328848  | 4 | - | 34  | HS3ST3B1      | heparan sulfate-glucosamine 3-sulfotransferase 3B1       | mRNA          |
| chr5  | 61114482  | 61114513  | 4 | - | 36  | NDUFAF2       | NADH:ubiquinone oxidoreductase complex assembly factor 2 | mRNA          |
| chr12 | 26978783  | 26978815  | 4 | + | 39  | TM7SF3        | transmembrane 7 superfamily member 3                     | mRNA          |
| chr7  | 100077596 | 100077619 | 4 | + | 39  | ZNF3          | zinc finger protein 3                                    | mRNA          |
| chr9  | 33348453  | 33348492  | 4 | - | 40  | NFX1          | nuclear transcription factor, X-box binding 1            | mRNA          |
| chr9  | 83054708  | 83054736  | 4 | + | 42  | RASEF         | RAS and EF-hand domain containing                        | mRNA          |
| chr17 | 51250075  | 51250104  | 4 | + | 44  | MBTD1         | mbt domain containing 1                                  | mRNA          |
| chr7  | 99485420  | 99485441  | 4 | - | 44  | ZNF789        | zinc finger protein 789                                  | mRNA          |
| chr3  | 142472210 | 142472250 | 4 | + | 49  | ATR           | ATR serine/threonine kinase                              | mRNA          |
| chr17 | 4110880   | 4110915   | 4 | + | 52  | ZZEF1         | zinc finger ZZ-type and EF-hand domain containing 1      | mRNA          |
| chr19 | 58000396  | 58000427  | 4 | + | 52  | ZNF606        | zinc finger protein 606                                  | mRNA          |
| chr8  | 140902739 | 140902792 | 4 | + | 78  | PTK2          | protein tyrosine kinase 2                                | mRNA          |
| chr15 | 45598265  | 45598363  | 4 | - | 102 | BLOC1S6       | biogenesis of lysosomal organelles complex 1 subunit 6   | mRNA          |
| chr2  | 32563882  | 32563917  | 4 | - | 36  | BIRC6-AS2     |                                                          | lncRNA        |
| chr5  | 142394456 | 142394494 | 4 | - | 46  | SPRY4-AS1     |                                                          | lncRNA        |
| chr2  | 165975488 | 165975532 | 4 | - | 52  | LOC102724058  |                                                          | lncRNA        |
| chr8  | 70646358  | 70646413  | 4 | + | 56  | LACTB2-AS1    |                                                          | lncRNA        |
| chr6  | 22135001  | 22135030  | 4 | - | 31  | NBAT1         |                                                          | lncRNA        |
| chr2  | 213276950 | 213276978 | 4 | - | 32  | SPAG16-DT     |                                                          | lncRNA        |
| chr2  | 37826262  | 37826288  | 4 | + | 32  | LINC00211     |                                                          | lncRNA        |
| chr3  | 128501793 | 128501819 | 4 | - | 33  | GATA2-AS1     |                                                          | lncRNA        |
| chr20 | 12951930  | 12951963  | 4 | - | 37  | LINC01772     |                                                          | lncRNA        |
| chr7  | 56534423  | 56534462  | 4 | - | 40  | LOC101928401  |                                                          | lncRNA        |
| chr11 | 127225    | 127268    | 4 | - | 44  | LINC01001     |                                                          | lncRNA        |
| chr10 | 17642941  | 17642986  | 4 | + | 58  | STAM-AS1      |                                                          | lncRNA        |
| chr16 | 29455126  | 29455181  | 4 | + | 60  | SLX1B-SULT1A4 |                                                          | lncRNA        |
| chr4  | 113761273 | 113761292 | 4 | + | 21  | CAMK2D        | calcium/calmodulin dependent protein kinase II delta     | mRNA          |
| chr2  | 174337814 | 174337833 | 4 | - | 22  | SP9           | Sp9 transcription factor                                 | mRNA          |
| chr21 | 45515629  | 45515652  | 4 | + | 24  | SLC19A1       | solute carrier family 19 member 1                        | mRNA          |
| chr6  | 55755246  | 55755266  | 4 | + | 24  | BMP5          | bone morphogenetic protein 5                             | mRNA          |
| chr2  | 96330068  | 96330092  | 4 | - | 25  | ITPRIPL1      | ITPRIP like 1                                            | mRNA          |
| chr16 | 28536527  | 28536553  | 4 | + | 27  | NUPR1         | nuclear protein, transcriptional regulator, 1            | mRNA          |

Supplementary Table S4\_Specific Peaks bound to PURa in CLIP-seq\_PURa vs IgG

|       |           |           |   |   |    |         |                                                               |               |
|-------|-----------|-----------|---|---|----|---------|---------------------------------------------------------------|---------------|
| chr4  | 127723789 | 127723814 | 4 | - | 29 | INTU    | inturned planar cell polarity protein                         | mRNA          |
| chr6  | 131894448 | 131894478 | 4 | + | 31 | ENPP1   | ectonucleotide pyrophosphatase/phosphodiesterase 1            | mRNA          |
| chr1  | 166913934 | 166913966 | 4 | - | 34 | ILDR2   | immunoglobulin like domain containing receptor 2              | mRNA          |
| chr12 | 121651133 | 121651164 | 4 | + | 34 | MORN3   | MORN repeat containing 3                                      | mRNA          |
| chr17 | 82489810  | 82489833  | 4 | - | 35 | NARF    | nuclear prelamin A recognition factor                         | mRNA          |
| chr12 | 121020302 | 121020334 | 4 | + | 36 | OASL    | 2'-5'-oligoadenylate synthetase like                          | mRNA          |
| chr5  | 176379334 | 176379370 | 4 | + | 37 | ARL10   | ADP-ribosylation factor-like 10                               | mRNA          |
| chr2  | 70279584  | 70279616  | 4 | - | 37 | PCYOX1  | prenylcysteine oxidase 1                                      | mRNA          |
| chr12 | 54546173  | 54546197  | 4 | - | 41 | NCKAP1L | NCK associated protein 1 like                                 | mRNA          |
| chr3  | 12734086  | 12734127  | 4 | + | 42 | TMEM40  | transmembrane protein 40                                      | mRNA          |
| chr5  | 65669615  | 65669655  | 4 | - | 43 | SGTB    | small glutamine rich tetratricopeptide repeat containing beta | mRNA          |
| chr12 | 10159287  | 10159326  | 4 | + | 43 | OLR1    | oxidized low density lipoprotein receptor 1                   | mRNA          |
| chr17 | 28908490  | 28908528  | 4 | + | 43 | PHF12   | PHD finger protein 12                                         | mRNA          |
| chr11 | 82729962  | 82729999  | 4 | + | 44 | FAM181B | family with sequence similarity 181, member B                 | mRNA          |
| chr19 | 34507186  | 34507229  | 4 | - | 45 | WTIP    | WT1 interacting protein                                       | mRNA          |
| chr9  | 83938920  | 83938963  | 4 | + | 47 | C9orf64 | chromosome 9 open reading frame 64                            | mRNA          |
| chr10 | 38122607  | 38122638  | 4 | - | 49 | ZNF37A  | zinc finger protein 37A                                       | mRNA          |
| chr12 | 120460970 | 120461008 | 4 | - | 53 | GATC    | glutamyl-tRNA amidotransferase subunit C                      | mRNA          |
| chr9  | 126697884 | 126697918 | 4 | + | 55 | LMX1B   | LIM homeobox transcription factor 1 beta                      | mRNA          |
| chrX  | 46604601  | 46604632  | 4 | + | 56 | SLC9A7  | solute carrier family 9 member A7                             | mRNA          |
| chr8  | 38988354  | 38988410  | 4 | - | 57 | HTRA4   | HtrA serine peptidase 4                                       | mRNA          |
| chr1  | 54638981  | 54639034  | 4 | - | 58 | ACOT11  | acyl-CoA thioesterase 11                                      | mRNA          |
| chr5  | 179035019 | 179035045 | 4 | - | 59 | ZNF879  | zinc finger protein 879                                       | mRNA          |
| chr3  | 182942706 | 182942727 | 4 | + | 59 | DCUN1D1 | defective in cullin neddylation 1 domain containing 1         | mRNA          |
| chr12 | 66121421  | 66121481  | 4 | + | 61 | LLPH    | LLP homolog, long-term synaptic facilitation factor           | mRNA          |
| chr19 | 1778785   | 1778815   | 4 | - | 61 | ONECUT3 | one cut homeobox 3                                            | mRNA          |
| chr5  | 6671000   | 6671060   | 4 | - | 61 | SRD5A1  | steroid 5 alpha-reductase 1                                   | mRNA          |
| chr10 | 122438857 | 122438903 | 4 | - | 66 | PLEKHA1 | pleckstrin homology domain containing A1                      | mRNA          |
| chr2  | 173965297 | 173965331 | 4 | + | 89 | SP3     | Sp3 transcription factor                                      | mRNA          |
| chr19 | 44384808  | 44384834  | 4 | - | 27 | ZNF285  | zinc finger protein 285                                       | mRNA          |
| chr17 | 79081897  | 79081907  | 3 | - | 11 | ENGASE  | endo-beta-N-acetylglucosaminidase                             | mRNA          |
| chr12 | 131986513 | 131986525 | 3 | - | 13 | EP400   | E1A binding protein p400                                      | mRNA          |
| chr17 | 79081061  | 79081073  | 3 | - | 13 | ENGASE  | endo-beta-N-acetylglucosaminidase                             | mRNA          |
| chr2  | 219162104 | 219162118 | 3 | - | 15 | SLC23A3 | solute carrier family 23 member 3                             | mRNA          |
| chr4  | 1819384   | 1819402   | 3 | + | 20 | LETM1   | leucine zipper and EF-hand containing transmembrane protein 1 | mRNA          |
| chr2  | 241869787 | 241869808 | 3 | - | 22 | RTP5    | receptor (chemosensory) transporter protein 5 (putative)      | mRNA          |
| chr7  | 128846334 | 128846355 | 3 | - | 22 | FLNC    | filamin C                                                     | mRNA          |
| chr19 | 15372230  | 15372250  | 3 | + | 22 | AKAP8   | A-kinase anchoring protein 8                                  | mRNA          |
| chr9  | 127523756 | 127523778 | 3 | + | 23 | NIBAN2  | niban apoptosis regulator 2                                   | mRNA          |
| chr6  | 57913270  | 57913309  | 3 | + | 42 | GUSBP4  |                                                               | pseudo        |
| chr7  | 1464748   | 1464775   | 3 | + | 28 |         |                                                               | no annotation |
| chr11 | 115646681 | 115646705 | 3 | - | 32 |         |                                                               | no annotation |
| chrX  | 42448082  | 42448121  | 3 | - | 59 |         |                                                               | no annotation |
| chr20 | 52051694  | 52051712  | 3 | + | 19 |         |                                                               | no annotation |
| chr9  | 79036988  | 79037007  | 3 | + | 20 |         |                                                               | no annotation |
| chr1  | 629931    | 629956    | 3 | + | 29 |         |                                                               | no annotation |
| chr20 | 62633848  | 62633869  | 3 | - | 29 |         |                                                               | no annotation |
| chr4  | 141405802 | 141405828 | 3 | + | 31 |         |                                                               | no annotation |
| chr9  | 66721325  | 66721353  | 3 | + | 32 |         |                                                               | no annotation |
| chr7  | 55579014  | 55579050  | 3 | + | 37 |         |                                                               | no annotation |
| chr5  | 127550617 | 127550634 | 3 | - | 18 | PRRC1   | proline rich coiled-coil 1                                    | mRNA          |
| chr12 | 63623807  | 63623824  | 3 | + | 18 | DPY19L2 | dpy-19 like 2                                                 | mRNA          |
| chr17 | 44720241  | 44720260  | 3 | - | 20 | DBF4B   | DBF4 zinc finger B                                            | mRNA          |
| chr15 | 68081526  | 68081549  | 3 | - | 24 | PIAS1   | protein inhibitor of activated STAT 1                         | mRNA          |
| chr3  | 127966070 | 127966093 | 3 | + | 25 | KBTBD12 | kelch repeat and BTB domain containing 12                     | mRNA          |
| chr1  | 108573525 | 108573549 | 3 | - | 25 | FAM102B | family with sequence similarity 102 member B                  | mRNA          |
| chr4  | 76480679  | 76480704  | 3 | - | 26 | SHROOM3 | shroom family member 3                                        | mRNA          |
| chr13 | 33849056  | 33849082  | 3 | - | 27 | RFC3    | replication factor C subunit 3                                | mRNA          |
| chr19 | 15383382  | 15383408  | 3 | + | 28 | AKAP8L  | A-kinase anchoring protein 8 like                             | mRNA          |
| chr10 | 72917431  | 72917459  | 3 | - | 30 | OIT3    | oncoprotein induced transcript 3                              | mRNA          |
| chr17 | 56984915  | 56984941  | 3 | - | 32 | SCPEP1  | serine carboxypeptidase 1                                     | mRNA          |
| chr19 | 35353298  | 35353323  | 3 | - | 33 | FFAR1   | free fatty acid receptor 1                                    | mRNA          |
| chr12 | 95934858  | 95934883  | 3 | + | 36 | CCDC38  | coiled-coil domain containing 38                              | mRNA          |
| chr19 | 50258509  | 50258545  | 3 | - | 39 | MYH14   | myosin heavy chain 14                                         | mRNA          |

Supplementary Table S4\_Specific Peaks bound to PURa in CLIP-seq\_PURa vs IgG

|       |           |           |   |   |    |           |                                                          |        |
|-------|-----------|-----------|---|---|----|-----------|----------------------------------------------------------|--------|
| chr3  | 142472075 | 142472113 | 3 | + | 39 | ATR       | ATR serine/threonine kinase                              | mRNA   |
| chr19 | 19932087  | 19932124  | 3 | - | 44 | ZNF93     | zinc finger protein 93                                   | mRNA   |
| chr19 | 43496028  | 43496063  | 3 | + | 46 | PHLDB3    | pleckstrin homology like domain family B member 3        | mRNA   |
| chr9  | 127184127 | 127184175 | 3 | - | 49 | RALGAP1   | Ral GEF with PH domain and SH3 binding motif 1           | mRNA   |
| chr1  | 174799960 | 174799992 | 3 | - | 50 | RABGAP1L  | RAB GTPase activating protein 1 like                     | mRNA   |
| chr7  | 151501981 | 151502018 | 3 | + | 53 | RHEB      | Ras homolog, mTORC1 binding                              | mRNA   |
| chr12 | 51202336  | 51202375  | 3 | + | 53 | POU6F1    | POU class 6 homeobox 1                                   | mRNA   |
| chr16 | 50074800  | 50074858  | 3 | - | 64 | HEATR3    | HEAT repeat containing 3                                 | mRNA   |
| chr21 | 37059189  | 37059232  | 3 | + | 44 | PIGP      | phosphatidylinositol glycan anchor biosynthesis class P  | mRNA   |
| chr11 | 19517870  | 19517892  | 3 | - | 24 | NAV2-AS4  |                                                          | lncRNA |
| chr5  | 173710988 | 173711011 | 3 | + | 24 | LINC01484 |                                                          | lncRNA |
| chrX  | 102826121 | 102826147 | 3 | - | 27 | LINC00630 |                                                          | lncRNA |
| chrX  | 74237518  | 74237549  | 3 | + | 34 | FTX       |                                                          | lncRNA |
| chr5  | 44775919  | 44775962  | 3 | + | 44 | MRPS30-DT |                                                          | lncRNA |
| chr12 | 12356761  | 12356779  | 3 | + | 20 | LOH12CR2  |                                                          | lncRNA |
| chr1  | 77881719  | 77881747  | 3 | - | 46 | NEXN-AS1  |                                                          | lncRNA |
| chr9  | 132594181 | 132594198 | 3 | + | 18 | DDX31     | DEAD-box helicase 31                                     | mRNA   |
| chr1  | 205303126 | 205303147 | 3 | + | 22 | NUAK2     | NUAK family kinase 2                                     | mRNA   |
| chr11 | 61581070  | 61581090  | 3 | + | 22 | SYT7      | synaptotagmin 7                                          | mRNA   |
| chr19 | 863413    | 863435    | 3 | - | 23 | CFD       | complement factor D                                      | mRNA   |
| chr1  | 42420316  | 42420339  | 3 | + | 24 | RIMKLA    | ribosomal modification protein rimK like family member A | mRNA   |
| chr13 | 48710751  | 48710773  | 3 | + | 24 | CYSLTR2   | cysteinyl leukotriene receptor 2                         | mRNA   |
| chr1  | 65638167  | 65638191  | 3 | - | 25 | LEPR      | leptin receptor                                          | mRNA   |
| chr10 | 118304470 | 118304491 | 3 | + | 25 | FAM204A   | family with sequence similarity 204 member A             | mRNA   |
| chr3  | 196049311 | 196049335 | 3 | + | 25 | TFRC      | transferrin receptor                                     | mRNA   |
| chr4  | 39477348  | 39477373  | 3 | - | 26 | LIAS      | lipoic acid synthetase                                   | mRNA   |
| chr10 | 112548435 | 112548461 | 3 | - | 27 | VTI1A     | vesicle transport through interaction with t-SNAREs 1A   | mRNA   |
| chr13 | 25163577  | 25163597  | 3 | - | 28 | AMER2     | APC membrane recruitment protein 2                       | mRNA   |
| chrX  | 3608054   | 3608081   | 3 | + | 28 | PRKX      | protein kinase, X-linked                                 | mRNA   |
| chr16 | 4804949   | 4804977   | 3 | + | 29 | GLYR1     | glyoxylate reductase 1 homolog                           | mRNA   |
| chr13 | 49492965  | 49492994  | 3 | - | 30 | SETDB2    | SET domain bifurcated histone lysine methyltransferase 2 | mRNA   |
| chr3  | 124905602 | 124905631 | 3 | + | 30 | MUC13     | mucin 13, cell surface associated                        | mRNA   |
| chr9  | 33253853  | 33253881  | 3 | + | 30 | BAG1      | BCL2 associated athanogene 1                             | mRNA   |
| chr12 | 55995423  | 55995452  | 3 | - | 32 | RAB5B     | RAB5B, member RAS oncogene family                        | mRNA   |
| chr7  | 38724748  | 38724779  | 3 | + | 32 | VPS41     | VPS41 subunit of HOPS complex                            | mRNA   |
| chr3  | 191267693 | 191267726 | 3 | - | 34 | UTS2B     | Urotensin 2B                                             | mRNA   |
| chr1  | 160029538 | 160029571 | 3 | + | 34 | PIGM      | phosphatidylinositol glycan anchor biosynthesis, class M | mRNA   |
| chr13 | 27256536  | 27256568  | 3 | - | 35 | RPL21     | ribosomal protein L21                                    | mRNA   |
| chr7  | 40096640  | 40096659  | 3 | - | 37 | CDK13     | cyclin dependent kinase 13                               | mRNA   |
| chr19 | 46467325  | 46467361  | 3 | - | 38 | PNMA8A    | PNMA family member 8A                                    | mRNA   |
| chr2  | 88110878  | 88110910  | 3 | + | 40 | SMYD1     | SET and MYND domain containing 1                         | mRNA   |
| chr15 | 40662759  | 40662801  | 3 | - | 43 | KNL1      | kinetochore scaffold 1                                   | mRNA   |
| chr20 | 3926915   | 3926946   | 3 | - | 43 | PANK2     | pantothenate kinase 2                                    | mRNA   |
| chr1  | 220058686 | 220058727 | 3 | + | 45 | BPNT1     | 3'(2'), 5'-bisphosphate nucleotidase 1                   | mRNA   |
| chr2  | 27155709  | 27155745  | 3 | - | 46 | TCF23     | transcription factor 23                                  | mRNA   |
| chr18 | 74585809  | 74585840  | 3 | - | 47 | CNDP1     | carnosine dipeptidase 1                                  | mRNA   |
| chr1  | 114584776 | 114584808 | 3 | + | 48 | DENND2C   | DENN domain containing 2C                                | mRNA   |
| chr14 | 70371424  | 70371476  | 3 | + | 53 | SYNJ2BP   | synaptojanin 2 binding protein                           | mRNA   |
| chr9  | 109018914 | 109018961 | 3 | + | 53 | TMEM245   | transmembrane protein 245                                | mRNA   |
| chr8  | 18029111  | 18029161  | 3 | - | 53 | PCM1      | pericentriolar material 1                                | mRNA   |
| chr19 | 15057691  | 15057734  | 3 | - | 56 | CASP14    | caspase 14, apoptosis-related cysteine peptidase         | mRNA   |
| chr5  | 83054654  | 83054690  | 3 | + | 57 | TMEM167A  | transmembrane protein 167A                               | mRNA   |
| chr15 | 94483494  | 94483525  | 3 | - | 64 | MCTP2     | multiple C2 and transmembrane domain containing 2        | mRNA   |
| chr1  | 26877881  | 26877905  | 3 | + | 25 | GPN2      | GPN-loop GTPase 2                                        | mRNA   |
| chr11 | 68894570  | 68894589  | 2 | + | 20 | MRPL21    | mitochondrial ribosomal protein L21                      | mRNA   |
| chr1  | 53963299  | 53963319  | 2 | - | 22 | LRRC42    | leucine rich repeat containing 42                        | mRNA   |
| chr11 | 94175863  | 94175889  | 2 | - | 28 | PANX1     | pannexin 1                                               | mRNA   |
| chr17 | 6854376   | 6854407   | 2 | - | 42 | ALOX12P2  |                                                          | pseudo |
| chr1  | 9730463   | 9730483   | 2 | + | 21 | CLSTN1    | calsyntenin 1                                            | mRNA   |
| chrX  | 155260403 | 155260424 | 2 | - | 23 | RAB39B    | RAB39B, member RAS oncogene family                       | mRNA   |
| chr15 | 20532500  | 20532526  | 2 | - | 27 | GOLGA6L6  | golgin A6 family-like 6                                  | mRNA   |
| chr13 | 110892942 | 110892959 | 2 | + | 18 | ANKRD10   | ankyrin repeat domain 10                                 | mRNA   |

Supplementary Table S4\_Specific Peaks bound to PUR $\alpha$  in CLIP-seq\_PUR $\alpha$  vs IgGSpecific mRNA bound to PUR $\alpha$  in CLIP-seq

| Chr   | Start     | End       | regionInfo | Gene     | Description                                                   | Genetype |
|-------|-----------|-----------|------------|----------|---------------------------------------------------------------|----------|
| chr20 | 326541    | 326564    | CDS        | SOX12    | SRY-box transcription factor 12                               | mRNA     |
| chr11 | 62880946  | 62881234  | CDS        | SLC3A2   | solute carrier family 3 member 2                              | mRNA     |
| chr4  | 108621950 | 108621997 | CDS        | RPL34    | ribosomal protein L34                                         | mRNA     |
| chr17 | 41518466  | 41518867  | CDS        | KRT15    | keratin 15                                                    | mRNA     |
| chr5  | 179705678 | 179705852 | CDS        | CANX     | calnexin                                                      | mRNA     |
| chr16 | 85801204  | 85801278  | CDS        | COX4I1   | cytochrome c oxidase subunit 4I1                              | mRNA     |
| chr3  | 194405993 | 194406094 | CDS        | ATP13A3  | ATPase 13A3                                                   | mRNA     |
| chr17 | 78971428  | 78971488  | CDS        | LGALS3BP | galectin 3 binding protein                                    | mRNA     |
| chr17 | 78971489  | 78971727  | CDS        | LGALS3BP | galectin 3 binding protein                                    | mRNA     |
| chr19 | 48966561  | 48966878  | CDS        | FTL      | ferritin light chain                                          | mRNA     |
| chr6  | 113860605 | 113860679 | CDS        | MARCKS   | myristoylated alanine-rich protein kinase C substrate         | mRNA     |
| chr11 | 319740    | 319870    | CDS        | IFITM3   | interferon induced transmembrane protein 3                    | mRNA     |
| chr8  | 11838558  | 11838778  | CDS        | FDFT1    | farnesyl-diphosphate farnesyltransferase 1                    | mRNA     |
| chr15 | 65887805  | 65887934  | CDS        | RAB11A   | RAB11A, member RAS oncogene family                            | mRNA     |
| chr1  | 203869869 | 203869983 | CDS        | SNRPE    | small nuclear ribonucleoprotein polypeptide E                 | mRNA     |
| chr4  | 6696899   | 6697013   | CDS        | S100P    | S100 calcium binding protein P                                | mRNA     |
| chr4  | 6697016   | 6697061   | CDS        | S100P    | S100 calcium binding protein P                                | mRNA     |
| chr8  | 11845060  | 11845214  | CDS        | CTSB     | cathepsin B                                                   | mRNA     |
| chr12 | 110721031 | 110721088 | CDS        | PPP1CC   | protein phosphatase 1 catalytic subunit gamma                 | mRNA     |
| chr19 | 5691599   | 5691644   | CDS        | RPL36    | ribosomal protein L36                                         | mRNA     |
| chr11 | 35229128  | 35229407  | CDS        | CD44     | CD44 molecule                                                 | mRNA     |
| chr8  | 144789768 | 144789829 | CDS        | RPL8     | ribosomal protein L8                                          | mRNA     |
| chr16 | 85806737  | 85806878  | CDS        | COX4I1   | cytochrome c oxidase subunit 4I1                              | mRNA     |
| chr5  | 179614797 | 179614959 | CDS        | HNRNPH1  | heterogeneous nuclear ribonucleoprotein H1                    | mRNA     |
| chr22 | 39522500  | 39522662  | CDS        | ATF4     | activating transcription factor 4                             | mRNA     |
| chr17 | 58005356  | 58005410  | CDS        | SRSF1    | serine and arginine rich splicing factor 1                    | mRNA     |
| chr4  | 55425375  | 55425469  | CDS        | TMEM165  | transmembrane protein 165                                     | mRNA     |
| chr17 | 50750502  | 50750574  | CDS        | LUC7L3   | LUC7 like 3 pre-mRNA splicing factor                          | mRNA     |
| chr3  | 49360176  | 49360382  | CDS        | RHOA     | ras homolog family member A                                   | mRNA     |
| chr1  | 183142618 | 183142763 | CDS        | LAMC1    | laminin, gamma 1 (formerly LAMB2)                             | mRNA     |
| chr8  | 119243416 | 119243661 | CDS        | MAL2     | mal, T cell differentiation protein 2                         | mRNA     |
| chr17 | 38850123  | 38850214  | CDS        | RPL23    | ribosomal protein L23                                         | mRNA     |
| chr8  | 99887539  | 99887618  | CDS        | COX6C    | cytochrome c oxidase subunit 6C                               | mRNA     |
| chr17 | 79081897  | 79081907  | CDS        | ENGASE   | endo-beta-N-acetylglucosaminidase                             | mRNA     |
| chr12 | 131986513 | 131986525 | CDS        | EP400    | E1A binding protein p400                                      | mRNA     |
| chr17 | 79081061  | 79081073  | CDS        | ENGASE   | endo-beta-N-acetylglucosaminidase                             | mRNA     |
| chr2  | 219162104 | 219162118 | CDS        | SLC23A3  | solute carrier family 23 member 3                             | mRNA     |
| chr5  | 96729712  | 96729725  | CDS        | CAST     | calpastatin                                                   | mRNA     |
| chr5  | 96730779  | 96730790  | CDS        | CAST     | calpastatin                                                   | mRNA     |
| chr4  | 1819384   | 1819402   | CDS        | LETM1    | leucine zipper and EF-hand containing transmembrane protein 1 | mRNA     |
| chr2  | 241869787 | 241869808 | CDS        | RTP5     | receptor (chemosensory) transporter protein 5 (putative)      | mRNA     |
| chr7  | 128846334 | 128846355 | CDS        | FLNC     | filamin C                                                     | mRNA     |
| chr19 | 15372230  | 15372250  | CDS        | AKAP8    | A-kinase anchoring protein 8                                  | mRNA     |
| chr9  | 127523756 | 127523778 | CDS        | NIBAN2   | niban apoptosis regulator 2                                   | mRNA     |
| chr18 | 31524702  | 31524727  | CDS        | DSG2     | desmoglein 2                                                  | mRNA     |
| chr11 | 62572583  | 62572612  | CDS        | EEF1G    | eukaryotic translation elongation factor 1 gamma              | mRNA     |
| chr11 | 65624341  | 65624366  | CDS        | PCNX3    | pecanex 3                                                     | mRNA     |
| chr14 | 102968328 | 102968358 | CDS        | CDC42BPB | CDC42 binding protein kinase beta                             | mRNA     |
| chr8  | 100718245 | 100718280 | CDS        | PABPC1   | poly(A) binding protein cytoplasmic 1                         | mRNA     |
| chr6  | 7585371   | 7585407   | CDS        | DSP      | desmoplakin                                                   | mRNA     |
| chr7  | 128084811 | 128084847 | CDS        | SND1     | staphylococcal nuclease and tudor domain containing 1         | mRNA     |
| chr18 | 743065    | 743097    | CDS        | YES1     | YES proto-oncogene 1                                          | mRNA     |
| chr7  | 128085710 | 128085746 | CDS        | SND1     | staphylococcal nuclease and tudor domain containing 1         | mRNA     |
| chr1  | 39568914  | 39568939  | CDS        | PABPC4   | poly(A) binding protein cytoplasmic 4                         | mRNA     |
| chr11 | 130141497 | 130141536 | CDS        | APLP2    | amyloid beta precursor like protein 2                         | mRNA     |
| chr10 | 42592910  | 42592948  | CDS        | ZNF33B   | zinc finger protein 33B                                       | mRNA     |
| chr10 | 96551371  | 96551411  | CDS        | TM9SF3   | transmembrane 9 superfamily member 3                          | mRNA     |
| chr2  | 46378708  | 46378732  | CDS        | EPAS1    | endothelial PAS domain protein 1                              | mRNA     |
| chr6  | 137204331 | 137204372 | CDS        | IFNGR1   | interferon gamma receptor 1                                   | mRNA     |

Supplementary Table S4\_Specific Peaks bound to PURa in CLIP-seq\_PURa vs IgG

|       |           |           |     |           |                                                                           |      |
|-------|-----------|-----------|-----|-----------|---------------------------------------------------------------------------|------|
| chr15 | 76935599  | 76935641  | CDS | RCN2      | reticulocalbin 2                                                          | mRNA |
| chr2  | 27383951  | 27383994  | CDS | PPM1G     | protein phosphatase, Mg <sup>2+</sup> /Mn <sup>2+</sup> dependent, 1G     | mRNA |
| chr3  | 194430272 | 194430315 | CDS | ATP13A3   | ATPase 13A3                                                               | mRNA |
| chr3  | 196065442 | 196065486 | CDS | TFRC      | transferrin receptor                                                      | mRNA |
| chr12 | 110339669 | 110339708 | CDS | ATP2A2    | ATPase sarcoplasmic/endoplasmic reticulum Ca <sup>2+</sup> transporting 2 | mRNA |
| chr1  | 88807737  | 88807775  | CDS | PKN2      | protein kinase N2                                                         | mRNA |
| chr10 | 93402231  | 93402275  | CDS | MYOF      | myoferlin                                                                 | mRNA |
| chr4  | 77048275  | 77048319  | CDS | CCNI      | cyclin I                                                                  | mRNA |
| chr8  | 39054480  | 39054524  | CDS | ADAM9     | ADAM metallopeptidase domain 9                                            | mRNA |
| chr10 | 93401517  | 93401544  | CDS | MYOF      | myoferlin                                                                 | mRNA |
| chr14 | 31144212  | 31144257  | CDS | HECTD1    | HECT domain E3 ubiquitin protein ligase 1                                 | mRNA |
| chr2  | 232549134 | 232549165 | CDS | TIGD1     | tigger transposable element derived 1                                     | mRNA |
| chr11 | 33339349  | 33339396  | CDS | HIPK3     | homeodomain interacting protein kinase 3                                  | mRNA |
| chr8  | 61643385  | 61643433  | CDS | ASPH      | aspartate beta-hydroxylase                                                | mRNA |
| chr19 | 41281223  | 41281275  | CDS | HNRNPUL1  | heterogeneous nuclear ribonucleoprotein U like 1                          | mRNA |
| chr4  | 39113019  | 39113059  | CDS | KLHL5     | kelch like family member 5                                                | mRNA |
| chr10 | 96527212  | 96527267  | CDS | TM9SF3    | transmembrane 9 superfamily member 3                                      | mRNA |
| chr2  | 96300997  | 96301053  | CDS | SNRNP200  | small nuclear ribonucleoprotein U5 subunit 200                            | mRNA |
| chr6  | 143502066 | 143502122 | CDS | FUCA2     | alpha-L-fucosidase 2                                                      | mRNA |
| chr3  | 105552143 | 105552182 | CDS | ALCAM     | activated leukocyte cell adhesion molecule                                | mRNA |
| chr2  | 218238792 | 218238850 | CDS | ARPC2     | actin related protein 2/3 complex subunit 2                               | mRNA |
| chr6  | 73782613  | 73782671  | CDS | CD109     | CD109 molecule                                                            | mRNA |
| chr8  | 123209390 | 123209442 | CDS | FAM83A    | family with sequence similarity 83 member A                               | mRNA |
| chr12 | 52518102  | 52518161  | CDS | KRT5      | keratin 5                                                                 | mRNA |
| chr6  | 143502007 | 143502063 | CDS | FUCA2     | alpha-L-fucosidase 2                                                      | mRNA |
| chr15 | 76947458  | 76947517  | CDS | RCN2      | reticulocalbin 2                                                          | mRNA |
| chr3  | 128064876 | 128064885 | CDS | SEC61A1   | SEC61 translocon alpha 1 subunit                                          | mRNA |
| chr12 | 103941467 | 103941527 | CDS | HSP90B1   | heat shock protein 90 beta family member 1                                | mRNA |
| chr19 | 41292244  | 41292286  | CDS | HNRNPUL1  | heterogeneous nuclear ribonucleoprotein U like 1                          | mRNA |
| chr2  | 44209283  | 44209325  | CDS | PPM1B     | protein phosphatase, Mg <sup>2+</sup> /Mn <sup>2+</sup> dependent 1B      | mRNA |
| chr13 | 25096985  | 25097032  | CDS | PABPC3    | poly(A) binding protein, cytoplasmic 3                                    | mRNA |
| chr7  | 112784576 | 112784620 | CDS | TMEM168   | transmembrane protein 168                                                 | mRNA |
| chr6  | 85533739  | 85533780  | CDS | SNX14     | sorting nexin 14                                                          | mRNA |
| chr2  | 222930749 | 222930805 | CDS | ACSL3     | acyl-CoA synthetase long chain family member 3                            | mRNA |
| chr1  | 39569862  | 39569924  | CDS | PABPC4    | poly(A) binding protein cytoplasmic 4                                     | mRNA |
| chr14 | 55671565  | 55671627  | CDS | KTN1      | kinectin 1                                                                | mRNA |
| chr14 | 61740512  | 61740575  | CDS | HIF1A     | hypoxia inducible factor 1 subunit alpha inhibitor                        | mRNA |
| chr9  | 98015363  | 98015426  | CDS | ANP32B    | acidic (leucine-rich) nuclear phosphoprotein 32 family, member B          | mRNA |
| chr12 | 22062371  | 22062434  | CDS | CMAS      | cytidine monophosphate N-acetylneuraminic acid synthetase                 | mRNA |
| chr11 | 62571837  | 62571901  | CDS | EEF1G     | eukaryotic translation elongation factor 1 gamma                          | mRNA |
| chr10 | 96552927  | 96552991  | CDS | TM9SF3    | transmembrane 9 superfamily member 3                                      | mRNA |
| chr8  | 125007423 | 125007487 | CDS | SQLE      | squalene epoxidase                                                        | mRNA |
| chrX  | 53584214  | 53584268  | CDS | HUWE1     | HECT, UBA and WWE domain containing E3 ubiquitin protein ligase 1         | mRNA |
| chr15 | 100905522 | 100905589 | CDS | ALDH1A3   | aldehyde dehydrogenase 1 family member A3                                 | mRNA |
| chr5  | 96896796  | 96896860  | CDS | ERAP2     | endoplasmic reticulum aminopeptidase 2                                    | mRNA |
| chr11 | 62884456  | 62884525  | CDS | SLC3A2    | solute carrier family 3 member 2                                          | mRNA |
| chr1  | 119968076 | 119968126 | CDS | NOTCH2    | notch receptor 2                                                          | mRNA |
| chr14 | 55661537  | 55661606  | CDS | KTN1      | kinectin 1                                                                | mRNA |
| chr5  | 10394081  | 10394143  | CDS | MARCHF6   | membrane associated ring-CH-type finger 6                                 | mRNA |
| chr3  | 180962882 | 180962951 | CDS | FXR1      | FMR1 autosomal homolog 1                                                  | mRNA |
| chr19 | 36145805  | 36145859  | CDS | CAPNS1    | calpain small subunit 1                                                   | mRNA |
| chr14 | 55672629  | 55672701  | CDS | KTN1      | kinectin 1                                                                | mRNA |
| chr14 | 55637276  | 55637348  | CDS | KTN1      | kinectin 1                                                                | mRNA |
| chr2  | 182736248 | 182736320 | CDS | DNAJC10   | DnaJ heat shock protein family (Hsp40) member C10                         | mRNA |
| chr5  | 135346009 | 135346057 | CDS | MACROH2A1 | macroH2A.1 histone                                                        | mRNA |
| chr6  | 18258330  | 18258405  | CDS | DEK       | DEK proto-oncogene                                                        | mRNA |
| chrX  | 53563745  | 53563821  | CDS | HUWE1     | HECT, UBA and WWE domain containing E3 ubiquitin protein ligase 1         | mRNA |
| chr12 | 49761703  | 49761779  | CDS | TMBIM6    | transmembrane BAX inhibitor motif containing 6                            | mRNA |
| chr4  | 186600298 | 186600360 | CDS | FAT1      | FAT atypical cadherin 1                                                   | mRNA |
| chr5  | 141578224 | 141578300 | CDS | DIAPH1    | diaphanous related formin 1                                               | mRNA |
| chr15 | 58611031  | 58611107  | CDS | ADAM10    | ADAM metallopeptidase domain 10                                           | mRNA |

Supplementary Table S4\_Specific Peaks bound to PURa in CLIP-seq\_PURa vs IgG

|       |           |           |     |         |                                                                           |      |
|-------|-----------|-----------|-----|---------|---------------------------------------------------------------------------|------|
| chr3  | 37327702  | 37327779  | CDS | GOLGA4  | golgin A4                                                                 | mRNA |
| chr2  | 27383995  | 27384073  | CDS | PPM1G   | protein phosphatase, Mg <sup>2+</sup> /Mn <sup>2+</sup> dependent, 1G     | mRNA |
| chr5  | 34938891  | 34938969  | CDS | DNAJC21 | DnaJ heat shock protein family (Hsp40) member C21                         | mRNA |
| chr1  | 244858728 | 244858807 | CDS | HNRNPU  | heterogeneous nuclear ribonucleoprotein U                                 | mRNA |
| chr3  | 149177889 | 149177964 | CDS | CP      | ceruloplasmin                                                             | mRNA |
| chr10 | 32911885  | 32911933  | CDS | ITGB1   | integrin subunit beta 1                                                   | mRNA |
| chr5  | 179726679 | 179726759 | CDS | CANX    | calnexin                                                                  | mRNA |
| chr3  | 112638173 | 112638250 | CDS | CCDC80  | coiled-coil domain containing 80                                          | mRNA |
| chr9  | 105385421 | 105385452 | CDS | SLC44A1 | solute carrier family 44 member 1                                         | mRNA |
| chrX  | 53562142  | 53562192  | CDS | HUWE1   | HECT, UBA and WWE domain containing E3 ubiquitin protein ligase 1         | mRNA |
| chr3  | 31625992  | 31626074  | CDS | STT3B   | STT3 oligosaccharyltransferase complex catalytic subunit B                | mRNA |
| chr8  | 39025802  | 39025884  | CDS | ADAM9   | ADAM metalloproteinase domain 9                                           | mRNA |
| chr14 | 55648033  | 55648115  | CDS | KTN1    | kinectin 1                                                                | mRNA |
| chr8  | 39082991  | 39083073  | CDS | ADAM9   | ADAM metalloproteinase domain 9                                           | mRNA |
| chr12 | 53297849  | 53297924  | CDS | PFDN5   | prefoldin subunit 5                                                       | mRNA |
| chr11 | 34076559  | 34076642  | CDS | CAPRN1  | cell cycle associated protein 1                                           | mRNA |
| chr11 | 65624470  | 65624523  | CDS | PCNX3   | pecanex 3                                                                 | mRNA |
| chr1  | 156135900 | 156135984 | CDS | LMNA    | lamin A/C                                                                 | mRNA |
| chr14 | 55672928  | 55673012  | CDS | KTN1    | kinectin 1                                                                | mRNA |
| chr14 | 55675834  | 55675918  | CDS | KTN1    | kinectin 1                                                                | mRNA |
| chr5  | 128112880 | 128112933 | CDS | SLC12A2 | solute carrier family 12 member 2                                         | mRNA |
| chr1  | 183134723 | 183134809 | CDS | LAMC1   | laminin, gamma 1 (formerly LAMB2)                                         | mRNA |
| chr12 | 110326389 | 110326475 | CDS | ATP2A2  | ATPase sarcoplasmic/endoplasmic reticulum Ca <sup>2+</sup> transporting 2 | mRNA |
| chr2  | 54631368  | 54631410  | CDS | SPTBN1  | spectrin beta, non-erythrocytic 1                                         | mRNA |
| chr14 | 55633234  | 55633321  | CDS | KTN1    | kinectin 1                                                                | mRNA |
| chr14 | 55636448  | 55636536  | CDS | KTN1    | kinectin 1                                                                | mRNA |
| chr1  | 10403070  | 10403122  | CDS | PGD     | phosphogluconate dehydrogenase                                            | mRNA |
| chr6  | 31626771  | 31626862  | CDS | PRRC2A  | proline rich coiled-coil 2A                                               | mRNA |
| chr3  | 31622202  | 31622283  | CDS | STT3B   | STT3 oligosaccharyltransferase complex catalytic subunit B                | mRNA |
| chr17 | 58005825  | 58005909  | CDS | SRSF1   | serine and arginine rich splicing factor 1                                | mRNA |
| chr3  | 53228055  | 53228149  | CDS | TKT     | transketolase                                                             | mRNA |
| chr2  | 43963612  | 43963655  | CDS | LRPPRC  | leucine rich pentatricopeptide repeat containing                          | mRNA |
| chr7  | 105110550 | 105110585 | CDS | KMT2E   | lysine methyltransferase 2E                                               | mRNA |
| chr10 | 71820239  | 71820335  | CDS | PSAP    | prosaposin                                                                | mRNA |
| chr12 | 52517901  | 52517992  | CDS | KRT5    | keratin 5                                                                 | mRNA |
| chr1  | 183118084 | 183118146 | CDS | LAMC1   | laminin, gamma 1 (formerly LAMB2)                                         | mRNA |
| chr1  | 156333546 | 156333638 | CDS | CCT3    | chaperonin containing TCPI subunit 3                                      | mRNA |
| chr3  | 121717032 | 121717099 | CDS | GOLGB1  | golgin B1                                                                 | mRNA |
| chr15 | 98942922  | 98943021  | CDS | IGF1R   | insulin like growth factor 1 receptor                                     | mRNA |
| chr10 | 74090097  | 74090121  | CDS | VCL     | vinculin                                                                  | mRNA |
| chr5  | 10426389  | 10426489  | CDS | MARCHF6 | membrane associated ring-CH-type finger 6                                 | mRNA |
| chr12 | 21646916  | 21647016  | CDS | LDHB    | lactate dehydrogenase B                                                   | mRNA |
| chr3  | 53229006  | 53229107  | CDS | TKT     | transketolase                                                             | mRNA |
| chr12 | 6236191   | 6236275   | CDS | CD9     | CD9 molecule                                                              | mRNA |
| chr12 | 103931520 | 103931623 | CDS | HSP90B1 | heat shock protein 90 beta family member 1                                | mRNA |
| chr17 | 75729287  | 75729390  | CDS | ITGB4   | integrin subunit beta 4                                                   | mRNA |
| chr2  | 55871050  | 55871123  | CDS | EFEMP1  | EGF containing fibulin extracellular matrix protein 1                     | mRNA |
| chr7  | 45916566  | 45916667  | CDS | IGFBP3  | insulin like growth factor binding protein 3                              | mRNA |
| chr1  | 230250456 | 230250560 | CDS | GALNT2  | polypeptide N-acetylgalactosaminyltransferase 2                           | mRNA |
| chr2  | 61877392  | 61877496  | CDS | CCT4    | chaperonin containing TCPI subunit 4                                      | mRNA |
| chr4  | 118308437 | 118308542 | CDS | PRSS12  | protease, serine, 12 (neurotrypsin, motopsin)                             | mRNA |
| chr3  | 105547192 | 105547253 | CDS | ALCAM   | activated leukocyte cell adhesion molecule                                | mRNA |
| chr1  | 23693806  | 23693913  | CDS | RPL11   | ribosomal protein L11                                                     | mRNA |
| chr8  | 116858351 | 116858458 | CDS | RAD21   | RAD21 cohesin complex component                                           | mRNA |
| chr1  | 119966375 | 119966482 | CDS | NOTCH2  | notch receptor 2                                                          | mRNA |
| chr5  | 133096097 | 133096204 | CDS | HSPA4   | heat shock protein family A (Hsp70) member 4                              | mRNA |
| chr1  | 114726982 | 114727090 | CDS | CSDE1   | cold shock domain containing E1                                           | mRNA |
| chr19 | 38283717  | 38283797  | CDS | SPINT2  | serine peptidase inhibitor, Kunitz type 2                                 | mRNA |
| chr5  | 141574066 | 141574139 | CDS | DIAPH1  | diaphanous related formin 1                                               | mRNA |
| chr8  | 124543086 | 124543194 | CDS | NDUFB9  | NADH:ubiquinone oxidoreductase subunit B9                                 | mRNA |
| chr18 | 46091708  | 46091816  | CDS | ATP5F1A | ATP synthase F1 subunit alpha                                             | mRNA |

Supplementary Table S4\_Specific Peaks bound to PURa in CLIP-seq\_PURa vs IgG

|       |           |           |     |         |                                                                           |      |
|-------|-----------|-----------|-----|---------|---------------------------------------------------------------------------|------|
| chr22 | 50280905  | 50280973  | CDS | PLXNB2  | plexin B2                                                                 | mRNA |
| chr15 | 90476695  | 90476803  | CDS | IQGAP1  | IQ motif containing GTPase activating protein 1                           | mRNA |
| chr2  | 74369423  | 74369491  | CDS | DCTN1   | dynactin subunit 1                                                        | mRNA |
| chr22 | 45535244  | 45535285  | CDS | FBLN1   | fibulin 1                                                                 | mRNA |
| chr1  | 119969578 | 119969687 | CDS | NOTCH2  | notch receptor 2                                                          | mRNA |
| chr5  | 141579116 | 141579196 | CDS | DIAPH1  | diaphanous related formin 1                                               | mRNA |
| chr7  | 2379133   | 2379242   | CDS | EIF3B   | eukaryotic translation initiation factor 3 subunit B                      | mRNA |
| chr2  | 61876943  | 61877052  | CDS | CCT4    | chaperonin containing TCPI subunit 4                                      | mRNA |
| chr8  | 73292688  | 73292797  | CDS | RPL7    | ribosomal protein L7                                                      | mRNA |
| chr1  | 186326103 | 186326163 | CDS | TPR     | translocated promoter region                                              | mRNA |
| chr1  | 186326165 | 186326213 | CDS | TPR     | translocated promoter region                                              | mRNA |
| chr1  | 116384013 | 116384059 | CDS | ATP1A1  | ATPase Na+/K+ transporting subunit alpha 1                                | mRNA |
| chr1  | 116384065 | 116384124 | CDS | ATP1A1  | ATPase Na+/K+ transporting subunit alpha 1                                | mRNA |
| chr10 | 32920273  | 32920321  | CDS | ITGB1   | integrin subunit beta 1                                                   | mRNA |
| chr8  | 116857379 | 116857473 | CDS | RAD21   | RAD21 cohesin complex component                                           | mRNA |
| chr19 | 3981338   | 3981452   | CDS | EEF2    | eukaryotic translation elongation factor 2                                | mRNA |
| chr5  | 179719667 | 179719781 | CDS | CANX    | calnexin                                                                  | mRNA |
| chr10 | 93369649  | 93369763  | CDS | MYOF    | myoferlin                                                                 | mRNA |
| chr2  | 241256288 | 241256335 | CDS | HDLBP   | high density lipoprotein binding protein                                  | mRNA |
| chr8  | 100717772 | 100717888 | CDS | PABPC1  | poly(A) binding protein cytoplasmic 1                                     | mRNA |
| chr5  | 141576755 | 141576817 | CDS | DIAPH1  | diaphanous related formin 1                                               | mRNA |
| chr14 | 55671784  | 55671877  | CDS | KTN1    | kinectin 1                                                                | mRNA |
| chr8  | 11847051  | 11847168  | CDS | CTSB    | cathepsin B                                                               | mRNA |
| chr12 | 21654542  | 21654659  | CDS | LDHB    | lactate dehydrogenase B                                                   | mRNA |
| chr14 | 55627911  | 55628028  | CDS | KTN1    | kinectin 1                                                                | mRNA |
| chr18 | 35689202  | 35689290  | CDS | GALNT1  | polypeptide N-acetylgalactosaminyltransferase 1                           | mRNA |
| chr11 | 88309202  | 88309276  | CDS | CTSC    | cathepsin C                                                               | mRNA |
| chr21 | 31667257  | 31667375  | CDS | SOD1    | superoxide dismutase 1                                                    | mRNA |
| chr1  | 43620873  | 43620992  | CDS | PTPRF   | protein tyrosine phosphatase receptor type F                              | mRNA |
| chr3  | 184334726 | 184334845 | CDS | EIF4G1  | eukaryotic translation initiation factor 4 gamma 1                        | mRNA |
| chr5  | 133097166 | 133097286 | CDS | HSPA4   | heat shock protein family A (Hsp70) member 4                              | mRNA |
| chr16 | 87841049  | 87841155  | CDS | SLC7A5  | solute carrier family 7 member 5                                          | mRNA |
| chr12 | 21637070  | 21637194  | CDS | LDHB    | lactate dehydrogenase B                                                   | mRNA |
| chr1  | 30995064  | 30995178  | CDS | PUM1    | pumilio RNA binding family member 1                                       | mRNA |
| chr2  | 10802498  | 10802623  | CDS | PDIA6   | protein disulfide isomerase family A member 6                             | mRNA |
| chr8  | 125021777 | 125021900 | CDS | SQLE    | squalene epoxidase                                                        | mRNA |
| chr3  | 41224525  | 41224650  | CDS | CTNNB1  | catenin beta 1                                                            | mRNA |
| chr9  | 87730373  | 87730498  | CDS | CTSL    | cathepsin L                                                               | mRNA |
| chr3  | 128626732 | 128626832 | CDS | RPN1    | ribophorin I                                                              | mRNA |
| chr18 | 36109618  | 36109683  | CDS | SLC39A6 | solute carrier family 39 member 6                                         | mRNA |
| chr11 | 10802293  | 10802421  | CDS | EIF4G2  | eukaryotic translation initiation factor 4 gamma 2                        | mRNA |
| chr2  | 10791794  | 10791925  | CDS | PDIA6   | protein disulfide isomerase family A member 6                             | mRNA |
| chr10 | 71821875  | 71822007  | CDS | PSAP    | prosaposin                                                                | mRNA |
| chr1  | 55146997  | 55147034  | CDS | USP24   | ubiquitin specific peptidase 24                                           | mRNA |
| chr12 | 110327563 | 110327674 | CDS | ATP2A2  | ATPase sarcoplasmic/endoplasmic reticulum Ca <sup>2+</sup> transporting 2 | mRNA |
| chr5  | 139321933 | 139322029 | CDS | MATR3   | matrin 3                                                                  | mRNA |
| chr3  | 112638102 | 112638149 | CDS | CCDC80  | coiled-coil domain containing 80                                          | mRNA |
| chr3  | 25633924  | 25633994  | CDS | TOP2B   | DNA topoisomerase II beta                                                 | mRNA |
| chr14 | 55634525  | 55634658  | CDS | KTN1    | kinectin 1                                                                | mRNA |
| chr17 | 41515884  | 41516010  | CDS | KRT15   | keratin 15                                                                | mRNA |
| chr1  | 23694659  | 23694796  | CDS | RPL11   | ribosomal protein L11                                                     | mRNA |
| chr6  | 158783540 | 158783589 | CDS | EZR     | ezzrin                                                                    | mRNA |
| chr6  | 31626070  | 31626162  | CDS | PRRC2A  | proline rich coiled-coil 2A                                               | mRNA |
| chr1  | 114730507 | 114730648 | CDS | CSDE1   | cold shock domain containing E1                                           | mRNA |
| chr14 | 55629956  | 55630097  | CDS | KTN1    | kinectin 1                                                                | mRNA |
| chr6  | 34425079  | 34425221  | CDS | RPS10   | ribosomal protein S10                                                     | mRNA |
| chr6  | 7558115   | 7558249   | CDS | DSP     | desmoplakin                                                               | mRNA |
| chr2  | 218234352 | 218234454 | CDS | ARPC2   | actin related protein 2/3 complex subunit 2                               | mRNA |
| chr15 | 76948409  | 76948471  | CDS | RCN2    | reticulocalbin 2                                                          | mRNA |
| chr11 | 62570964  | 62571108  | CDS | EEF1G   | eukaryotic translation elongation factor 1 gamma                          | mRNA |
| chr1  | 1053841   | 1053894   | CDS | AGRN    | agrin                                                                     | mRNA |



Supplementary Table S4\_Specific Peaks bound to PURa in CLIP-seq\_PURa vs IgG

|       |           |           |     |         |                                                                           |      |
|-------|-----------|-----------|-----|---------|---------------------------------------------------------------------------|------|
| chr11 | 1761323   | 1761468   | CDS | CTSD    | cathepsin D                                                               | mRNA |
| chr3  | 184324200 | 184324347 | CDS | EIF4G1  | eukaryotic translation initiation factor 4 gamma 1                        | mRNA |
| chr8  | 116726061 | 116726162 | CDS | EIF3H   | eukaryotic translation initiation factor 3 subunit H                      | mRNA |
| chr11 | 111296108 | 111296207 | CDS | COLCA1  | colorectal cancer associated 1                                            | mRNA |
| chr17 | 63766027  | 63766045  | CDS | CCDC47  | coiled-coil domain containing 47                                          | mRNA |
| chr5  | 136049490 | 136049580 | CDS | TGFB1   | transforming growth factor beta induced                                   | mRNA |
| chr1  | 23692608  | 23692759  | CDS | RPL11   | ribosomal protein L11                                                     | mRNA |
| chr19 | 38721537  | 38721688  | CDS | ACTN4   | actinin alpha 4                                                           | mRNA |
| chr8  | 39026676  | 39026810  | CDS | ADAM9   | ADAM metalloproteinase domain 9                                           | mRNA |
| chr1  | 81907083  | 81907214  | CDS | ADGRL2  | adhesion G protein-coupled receptor L2                                    | mRNA |
| chr1  | 116398929 | 116399016 | CDS | ATP1A1  |                                                                           | mRNA |
| chr11 | 102401538 | 102401692 | CDS | TMEM123 | transmembrane protein 123                                                 | mRNA |
| chr1  | 209616470 | 209616624 | CDS | LAMB3   | laminin subunit beta 3                                                    | mRNA |
| chr6  | 43159870  | 43159957  | CDS | PTK7    | protein tyrosine kinase 7 (inactive)                                      | mRNA |
| chr8  | 39023170  | 39023277  | CDS | ADAM9   | ADAM metalloproteinase domain 9                                           | mRNA |
| chr8  | 39023279  | 39023325  | CDS | ADAM9   | ADAM metalloproteinase domain 9                                           | mRNA |
| chr8  | 119240164 | 119240320 | CDS | MAL2    | mal, T cell differentiation protein 2                                     | mRNA |
| chr14 | 64186473  | 64186579  | CDS | SYNE2   | spectrin repeat containing nuclear envelope protein 2                     | mRNA |
| chr18 | 743259    | 743285    | CDS | YES1    | YES proto-oncogene 1                                                      | mRNA |
| chr16 | 85805709  | 85805864  | CDS | COX4I1  | cytochrome c oxidase subunit 4I1                                          | mRNA |
| chr10 | 32911966  | 32912124  | CDS | ITGB1   | integrin subunit beta 1                                                   | mRNA |
| chr11 | 71437795  | 71437943  | CDS | DHCR7   | 7-dehydrocholesterol reductase                                            | mRNA |
| chr1  | 156320864 | 156321025 | CDS | CCT3    | chaperonin containing TCPI subunit 3                                      | mRNA |
| chr7  | 45917212  | 45917374  | CDS | IGFBP3  | insulin like growth factor binding protein 3                              | mRNA |
| chr16 | 85804936  | 85805104  | CDS | COX4I1  | cytochrome c oxidase subunit 4I1                                          | mRNA |
| chrX  | 53561780  | 53561924  | CDS | HUWE1   | HECT, UBA and WWE domain containing E3 ubiquitin protein ligase 1         | mRNA |
| chr1  | 116398620 | 116398735 | CDS | ATP1A1  | ATPase Na+/K+ transporting subunit alpha 1                                | mRNA |
| chr1  | 116398749 | 116398789 | CDS | ATP1A1  | ATPase Na+/K+ transporting subunit alpha 1                                | mRNA |
| chr17 | 42999932  | 43000102  | CDS | RPL27   | ribosomal protein L27                                                     | mRNA |
| chr17 | 7890570   | 7890683   | CDS | CHD3    | chromodomain helicase DNA binding protein 3                               | mRNA |
| chr8  | 39042070  | 39042117  | CDS | ADAM9   | ADAM metalloproteinase domain 9                                           | mRNA |
| chr1  | 54853453  | 54853609  | CDS | DHCR24  | 24-dehydrocholesterol reductase                                           | mRNA |
| chr2  | 172469188 | 172469302 | CDS | ITGA6   | integrin subunit alpha 6                                                  | mRNA |
| chr10 | 32919884  | 32919984  | CDS | ITGB1   | integrin subunit beta 1                                                   | mRNA |
| chr6  | 137203546 | 137203675 | CDS | IFNGR1  | interferon gamma receptor 1                                               | mRNA |
| chr8  | 39077227  | 39077297  | CDS | ADAM9   | ADAM metalloproteinase domain 9                                           | mRNA |
| chr8  | 39077304  | 39077411  | CDS | ADAM9   | ADAM metalloproteinase domain 9                                           | mRNA |
| chr12 | 56643402  | 56643587  | CDS | ATP5F1B | ATP synthase F1 subunit beta                                              | mRNA |
| chr10 | 119049804 | 119049985 | CDS | EIF3A   | eukaryotic translation initiation factor 3 subunit A                      | mRNA |
| chr19 | 48913053  | 48913128  | CDS | NUCB1   | nucleobindin 1                                                            | mRNA |
| chr1  | 156744162 | 156744348 | CDS | HDGF    | heparin binding growth factor                                             | mRNA |
| chr3  | 49968148  | 49968224  | CDS | RBM6    | RNA binding motif protein 6                                               | mRNA |
| chr10 | 71819713  | 71819900  | CDS | PSAP    | prosaposin                                                                | mRNA |
| chr14 | 20455913  | 20456101  | CDS | APEX1   | apurinic/aprimidinic endodeoxyribonuclease 1                              | mRNA |
| chr1  | 183110492 | 183110606 | CDS | LAMC1   | laminin, gamma 1 (formerly LAMB2)                                         | mRNA |
| chr8  | 100721390 | 100721472 | CDS | PABPC1  | poly(A) binding protein cytoplasmic 1                                     | mRNA |
| chr8  | 39017218  | 39017277  | CDS | ADAM9   | ADAM metalloproteinase domain 9                                           | mRNA |
| chr8  | 39017313  | 39017396  | CDS | ADAM9   | ADAM metalloproteinase domain 9                                           | mRNA |
| chr19 | 40374518  | 40374620  | CDS | PLD3    | phospholipase D family member 3                                           | mRNA |
| chr1  | 43619321  | 43619408  | CDS | PTPRF   | protein tyrosine phosphatase receptor type F                              | mRNA |
| chr8  | 47807136  | 47807299  | CDS | PRKDC   | protein kinase, DNA-activated, catalytic subunit                          | mRNA |
| chr3  | 196075240 | 196075360 | CDS | TFRC    | transferrin receptor                                                      | mRNA |
| chr11 | 71438941  | 71439083  | CDS | DHCR7   | 7-dehydrocholesterol reductase                                            | mRNA |
| chr1  | 183130343 | 183130549 | CDS | LAMC1   | laminin, gamma 1 (formerly LAMB2)                                         | mRNA |
| chr10 | 119042006 | 119042212 | CDS | EIF3A   | eukaryotic translation initiation factor 3 subunit A                      | mRNA |
| chr1  | 39568801  | 39568900  | CDS | PABPC4  | poly(A) binding protein cytoplasmic 4                                     | mRNA |
| chr11 | 130122369 | 130122425 | CDS | APLP2   | amyloid beta precursor like protein 2                                     | mRNA |
| chr12 | 110343358 | 110343418 | CDS | ATP2A2  | ATPase sarcoplasmic/endoplasmic reticulum Ca <sup>2+</sup> transporting 2 | mRNA |
| chr12 | 57718145  | 57718359  | CDS | OS9     | OS9 endoplasmic reticulum lectin                                          | mRNA |
| chr9  | 19378707  | 19378918  | CDS | RPS6    | ribosomal protein S6                                                      | mRNA |
| chr3  | 49122162  | 49122346  | CDS | LAMB2   | laminin subunit beta 2                                                    | mRNA |

Supplementary Table S4\_Specific Peaks bound to PURa in CLIP-seq\_PURa vs IgG

|       |           |           |             |          |                                                            |      |
|-------|-----------|-----------|-------------|----------|------------------------------------------------------------|------|
| chr3  | 105524417 | 105524491 | CDS         | ALCAM    | activated leukocyte cell adhesion molecule                 | mRNA |
| chr3  | 184324877 | 184325114 | CDS         | EIF4G1   | eukaryotic translation initiation factor 4 gamma 1         | mRNA |
| chr5  | 181242215 | 181242345 | CDS         | RACK1    | receptor for activated C kinase 1                          | mRNA |
| chr11 | 34076250  | 34076474  | CDS         | CAPRIN1  | cell cycle associated protein 1                            | mRNA |
| chr10 | 119042359 | 119042512 | CDS         | EIF3A    | eukaryotic translation initiation factor 3 subunit A       | mRNA |
| chr6  | 7580672   | 7580921   | CDS         | DSP      | desmoplakin                                                | mRNA |
| chr1  | 43588772  | 43589000  | CDS         | PTPRF    | protein tyrosine phosphatase receptor type F               | mRNA |
| chr14 | 55612303  | 55612389  | CDS         | KTN1     | kinectin 1                                                 | mRNA |
| chr4  | 186706562 | 186706835 | CDS         | FAT1     | FAT atypical cadherin 1                                    | mRNA |
| chr8  | 118110051 | 118110141 | CDS         | EXT1     | exostosin glycosyltransferase 1                            | mRNA |
| chr1  | 214645916 | 214646132 | CDS         | CENPF    | centromere protein F                                       | mRNA |
| chr4  | 186707201 | 186707366 | CDS         | FAT1     | FAT atypical cadherin 1                                    | mRNA |
| chr17 | 41515487  | 41515692  | CDS         | KRT15    | keratin 15                                                 | mRNA |
| chr3  | 121695488 | 121695667 | CDS         | GOLGB1   | golgin B1                                                  | mRNA |
| chr4  | 186618197 | 186618463 | CDS         | FAT1     | FAT atypical cadherin 1                                    | mRNA |
| chr6  | 7584730   | 7584928   | CDS         | DSP      | desmoplakin                                                | mRNA |
| chr6  | 7579501   | 7579830   | CDS         | DSP      | desmoplakin                                                | mRNA |
| chr3  | 49531186  | 49531256  | CDS         | DAG1     | dystroglycan 1                                             | mRNA |
| chr14 | 39180764  | 39180962  | CDS         | PNN      | pinin, desmosome associated protein                        | mRNA |
| chr11 | 70420336  | 70420615  | CDS         | CTTN     | cortactin                                                  | mRNA |
| chr6  | 7583435   | 7583518   | CDS         | DSP      | desmoplakin                                                | mRNA |
| chr11 | 1759015   | 1759087   | CDS         | CSTD     | cathepsin D                                                | mRNA |
| chr3  | 9249370   | 9249449   | five_prime_ | SRGAP3   | SLIT-ROBO Rho GTPase activating protein 3                  | mRNA |
| chr8  | 124999365 | 124999482 | five_prime_ | SQLE     | squalene epoxidase                                         | mRNA |
| chr6  | 34426031  | 34426069  | five_prime_ | RPS10    | ribosomal protein S10                                      | mRNA |
| chr4  | 108620579 | 108620600 | five_prime_ | RPL34    | ribosomal protein L34                                      | mRNA |
| chr8  | 73293598  | 73293629  | five_prime_ | RPL7     | ribosomal protein L7                                       | mRNA |
| chr20 | 45670212  | 45670256  | five_prime_ | WFDC11   | WAP four-disulfide core domain 11                          | mRNA |
| chr18 | 3451868   | 3451953   | five_prime_ | TGIF1    | TGFB induced factor homeobox 1                             | mRNA |
| chr19 | 50637895  | 50637920  | five_prime_ | SYT3     | synaptotagmin 3                                            | mRNA |
| chr16 | 16379064  | 16379118  | five_prime_ | NPIPA7   | nuclear pore complex interacting protein family, member A7 | mRNA |
| chr16 | 16379141  | 16379200  | five_prime_ | NPIPA7   | nuclear pore complex interacting protein family, member A7 | mRNA |
| chr15 | 98649436  | 98649510  | five_prime_ | IGF1R    | insulin like growth factor 1 receptor                      | mRNA |
| chr3  | 9249263   | 9249347   | five_prime_ | SRGAP3   | SLIT-ROBO Rho GTPase activating protein 3                  | mRNA |
| chr3  | 112640729 | 112640814 | five_prime_ | CCDC80   | coiled-coil domain containing 80                           | mRNA |
| chr8  | 124999328 | 124999361 | five_prime_ | SQLE     | squalene epoxidase                                         | mRNA |
| chr2  | 61537639  | 61537809  | five_prime_ | XPO1     | exportin 1                                                 | mRNA |
| chr6  | 30616608  | 30616642  | five_prime_ | PPP1R10  | protein phosphatase 1 regulatory subunit 10                | mRNA |
| chr19 | 48704195  | 48704208  | intron      | FUT2     | fucosyltransferase 2 (secretor status included)            | mRNA |
| chr13 | 45337197  | 45337320  | intron      | TPT1     | tumor protein, translationally-controlled 1                | mRNA |
| chr8  | 11844018  | 11844167  | intron      | CTSB     | cathepsin B                                                | mRNA |
| chr21 | 39342497  | 39342570  | intron      | HMGN1    | high mobility group nucleosome binding domain 1            | mRNA |
| chr21 | 39342574  | 39342692  | intron      | HMGN1    | high mobility group nucleosome binding domain 1            | mRNA |
| chr5  | 127550617 | 127550634 | intron      | PRRC1    | proline rich coiled-coil 1                                 | mRNA |
| chr12 | 63623807  | 63623824  | intron      | DPY19L2  | dpy-19 like 2                                              | mRNA |
| chr17 | 44720241  | 44720260  | intron      | DBF4B    | DBF4 zinc finger B                                         | mRNA |
| chr11 | 68894570  | 68894589  | intron      | MRPL21   | mitochondrial ribosomal protein L21                        | mRNA |
| chr1  | 53963299  | 53963319  | intron      | LRRC42   | leucine rich repeat containing 42                          | mRNA |
| chr15 | 68081526  | 68081549  | intron      | PIAS1    | protein inhibitor of activated STAT 1                      | mRNA |
| chr3  | 127966070 | 127966093 | intron      | KBTD12   | kelch repeat and BTB domain containing 12                  | mRNA |
| chr1  | 108573525 | 108573549 | intron      | FAM102B  | family with sequence similarity 102 member B               | mRNA |
| chr4  | 76480679  | 76480704  | intron      | SHROOM3  | shroom family member 3                                     | mRNA |
| chr5  | 112164624 | 112164647 | intron      | EPB41L4A | erythrocyte membrane protein band 4.1 like 4A              | mRNA |
| chr16 | 4839267   | 4839292   | intron      | GLYR1    | glyoxylate reductase 1 homolog                             | mRNA |
| chr13 | 33849056  | 33849082  | intron      | RFC3     | replication factor C subunit 3                             | mRNA |
| chr20 | 53398567  | 53398594  | intron      | TSHZ2    | teashirt zinc finger homeobox 2                            | mRNA |
| chr11 | 94175863  | 94175889  | intron      | PANX1    | pannexin 1                                                 | mRNA |
| chr19 | 15383382  | 15383408  | intron      | AKAP8L   | A-kinase anchoring protein 8 like                          | mRNA |
| chr10 | 72917431  | 72917459  | intron      | OIT3     | oncoprotein induced transcript 3                           | mRNA |
| chr19 | 6717633   | 6717659   | intron      | C3       | complement C3                                              | mRNA |
| chr19 | 6717661   | 6717690   | intron      | C3       | complement C3                                              | mRNA |

Supplementary Table S4\_Specific Peaks bound to PURa in CLIP-seq\_PURa vs IgG

|       |           |           |        |          |                                                            |      |
|-------|-----------|-----------|--------|----------|------------------------------------------------------------|------|
| chr14 | 50727603  | 50727628  | intron | NIN      | ninein                                                     | mRNA |
| chr1  | 18858431  | 18858462  | intron | TAS1R2   | taste receptor, type 1, member 2                           | mRNA |
| chr6  | 3303281   | 3303312   | intron | SLC22A23 | solute carrier family 22 member 23                         | mRNA |
| chr17 | 56984915  | 56984941  | intron | SCPEP1   | serine carboxypeptidase 1                                  | mRNA |
| chr15 | 29760020  | 29760052  | intron | TJP1     | tight junction protein 1                                   | mRNA |
| chr11 | 88322110  | 88322139  | intron | CTSC     | cathepsin C                                                | mRNA |
| chr19 | 35353298  | 35353323  | intron | FFAR1    | free fatty acid receptor 1                                 | mRNA |
| chr16 | 89740613  | 89740646  | intron | ZNF276   | zinc finger protein 276                                    | mRNA |
| chr2  | 219555449 | 219555482 | intron | OBSL1    | obscurin like cytoskeletal adaptor 1                       | mRNA |
| chr12 | 122020317 | 122020339 | intron | BCL7A    | B-cell CLL/lymphoma 7 protein family member A              | mRNA |
| chr17 | 14328815  | 14328848  | intron | HS3ST3B1 | heparan sulfate-glucosamine 3-sulfotransferase 3B1         | mRNA |
| chr11 | 117907881 | 117907907 | intron | TMPRSS13 | transmembrane serine protease 13                           | mRNA |
| chr17 | 75263693  | 75263722  | intron | MRPS7    | mitochondrial ribosomal protein S7                         | mRNA |
| chr5  | 61114482  | 61114513  | intron | NDUFAF2  | NADH:ubiquinone oxidoreductase complex assembly factor 2   | mRNA |
| chr19 | 53158879  | 53158914  | intron | ZNF347   | zinc finger protein 347                                    | mRNA |
| chr3  | 50101291  | 50101324  | intron | RBM5     | RNA binding motif protein 5                                | mRNA |
| chr18 | 79967425  | 79967458  | intron | HSBP1L1  | heat shock factor binding protein 1-like 1                 | mRNA |
| chr22 | 17003836  | 17003870  | intron | GAB4     | GRB2 associated binding protein family member 4            | mRNA |
| chr12 | 4676051   | 4676086   | intron | NDUFA9   | NADH:ubiquinone oxidoreductase subunit A9                  | mRNA |
| chr12 | 65954995  | 65955027  | intron | HMGAT2   | high mobility group AT-hook 2                              | mRNA |
| chr12 | 95934858  | 95934883  | intron | CCDC38   | coiled-coil domain containing 38                           | mRNA |
| chr15 | 45598094  | 45598129  | intron | BLOC1S6  | biogenesis of lysosomal organelles complex 1 subunit 6     | mRNA |
| chr3  | 185293013 | 185293046 | intron | MAP3K13  | mitogen-activated protein kinase kinase kinase 13          | mRNA |
| chr2  | 61887742  | 61887777  | intron | CCT4     | chaperonin containing TCP1 subunit 4                       | mRNA |
| chr9  | 122874692 | 122874722 | intron | RC3H2    | ring finger and CCCH-type domains 2                        | mRNA |
| chr16 | 67615430  | 67615460  | intron | CTCF     | CCCTC-binding factor                                       | mRNA |
| chr2  | 177249593 | 177249630 | intron | NFE2L2   | nuclear factor, erythroid 2 like 2                         | mRNA |
| chr21 | 15063795  | 15063830  | intron | NRIP1    | nuclear receptor interacting protein 1                     | mRNA |
| chr1  | 179544488 | 179544524 | intron | AXDND1   | axonemal dynein light chain domain containing 1            | mRNA |
| chr12 | 26978783  | 26978815  | intron | TM7SF3   | transmembrane 7 superfamily member 3                       | mRNA |
| chr7  | 102352533 | 102352569 | intron | SPDYB6   | speedy/RINGO cell cycle regulator family member E6         | mRNA |
| chr7  | 100077596 | 100077619 | intron | ZNF3     | zinc finger protein 3                                      | mRNA |
| chr19 | 50258509  | 50258545  | intron | MYH14    | myosin heavy chain 14                                      | mRNA |
| chr3  | 142472075 | 142472113 | intron | ATR      | ATR serine/threonine kinase                                | mRNA |
| chr6  | 47002365  | 47002404  | intron | ADGRF1   | adhesion G protein-coupled receptor F1                     | mRNA |
| chr22 | 46525532  | 46525569  | intron | CELSR1   | cadherin EGF LAG seven-pass G-type receptor 1              | mRNA |
| chr17 | 63746922  | 63746961  | intron | CCDC47   | coiled-coil domain containing 47                           | mRNA |
| chr9  | 33348453  | 33348492  | intron | NFX1     | nuclear transcription factor, X-box binding 1              | mRNA |
| chr9  | 116612382 | 116612416 | intron | ASTN2    | astrotactin 2                                              | mRNA |
| chr1  | 20775334  | 20775374  | intron | HP1BP3   | heterochromatin protein 1 binding protein 3                | mRNA |
| chr9  | 123079550 | 123079587 | intron | RABGAP1  | RAB GTPase activating protein 1                            | mRNA |
| chr3  | 167692439 | 167692469 | intron | PDCD10   | programmed cell death 10                                   | mRNA |
| chr14 | 51639142  | 51639177  | intron | FRMD6    | FERM domain containing 6                                   | mRNA |
| chr11 | 13394774  | 13394813  | intron | BTBD10   | BTB domain containing 10                                   | mRNA |
| chr5  | 80651419  | 80651460  | intron | DHFR     | dihydrofolate reductase                                    | mRNA |
| chr9  | 83054708  | 83054736  | intron | RASEF    | RAS and EF-hand domain containing                          | mRNA |
| chr18 | 37075575  | 37075611  | intron | KIAA1328 | KIAA1328                                                   | mRNA |
| chr1  | 27670207  | 27670249  | intron | IFI6     | interferon alpha inducible protein 6                       | mRNA |
| chr11 | 32587104  | 32587144  | intron | EIF3M    | eukaryotic translation initiation factor 3 subunit M       | mRNA |
| chr15 | 72370508  | 72370541  | intron | HEXA     | hexosaminidase subunit alpha                               | mRNA |
| chr19 | 44095039  | 44095082  | intron | ZNF224   | zinc finger protein 224                                    | mRNA |
| chr17 | 51250075  | 51250104  | intron | MBTD1    | mbt domain containing 1                                    | mRNA |
| chr7  | 99485420  | 99485441  | intron | ZNF789   | zinc finger protein 789                                    | mRNA |
| chr19 | 19932087  | 19932124  | intron | ZNF93    | zinc finger protein 93                                     | mRNA |
| chr8  | 11807158  | 11807199  | intron | FDFT1    | farnesyl-diphosphate farnesyltransferase 1                 | mRNA |
| chr12 | 20860261  | 20860303  | intron | SLCO1B3  | solute carrier organic anion transporter family member 1B3 | mRNA |
| chr18 | 80162316  | 80162359  | intron | PAR6G    | par-6 family cell polarity regulator gamma                 | mRNA |
| chr13 | 39044284  | 39044329  | intron | NHLRC3   | NHL repeat containing 3                                    | mRNA |
| chr2  | 207531487 | 207531522 | intron | CREB1    | cAMP responsive element binding protein 1                  | mRNA |
| chrX  | 41649589  | 41649624  | intron | CASK     | calcium/calmodulin dependent serine protein kinase         | mRNA |
| chr19 | 43496028  | 43496063  | intron | PHLDB3   | pleckstrin homology like domain family B member 3          | mRNA |

Supplementary Table S4\_Specific Peaks bound to PURa in CLIP-seq\_PURa vs IgG

|       |           |           |        |           |                                                                      |      |
|-------|-----------|-----------|--------|-----------|----------------------------------------------------------------------|------|
| chr3  | 131001366 | 131001412 | intron | ATP2C1    | ATPase secretory pathway Ca <sup>2+</sup> transporting 1             | mRNA |
| chr8  | 43063251  | 43063294  | intron | FNTA      | farnesyltransferase                                                  | mRNA |
| chr9  | 124528327 | 124528362 | intron | NR6A1     | nuclear receptor subfamily 6 group A member 1                        | mRNA |
| chr15 | 89591694  | 89591733  | intron | TICRR     | TOPBP1 interacting checkpoint and replication regulator              | mRNA |
| chr4  | 37952410  | 37952451  | intron | TBC1D1    | TBC1 domain family member 1                                          | mRNA |
| chr6  | 63658799  | 63658842  | intron | PHF3      | PHD finger protein 3                                                 | mRNA |
| chr9  | 33347912  | 33347951  | intron | NFX1      | nuclear transcription factor, X-box binding 1                        | mRNA |
| chr11 | 35194842  | 35194883  | intron | CD44      | CD44 molecule                                                        | mRNA |
| chr16 | 67007435  | 67007468  | intron | CES4A     | carboxylesterase 4A                                                  | mRNA |
| chr3  | 142472210 | 142472250 | intron | ATR       | ATR serine/threonine kinase                                          | mRNA |
| chr9  | 127184127 | 127184175 | intron | RALGPS1   | Ral GEF with PH domain and SH3 binding motif 1                       | mRNA |
| chr8  | 11319047  | 11319080  | intron | MTMR9     | myotubularin related protein 9                                       | mRNA |
| chr22 | 16978267  | 16978296  | intron | GAB4      | GRB2 associated binding protein family member 4                      | mRNA |
| chr16 | 61725898  | 61725930  | intron | CDH8      | cadherin 8                                                           | mRNA |
| chr11 | 31574770  | 31574792  | intron | ELP4      | elongator acetyltransferase complex subunit 4                        | mRNA |
| chr1  | 174799960 | 174799992 | intron | RABGAP1L  | RAB GTPase activating protein 1 like                                 | mRNA |
| chr14 | 55136212  | 55136262  | intron | LGALS3    | galectin 3                                                           | mRNA |
| chr2  | 44229614  | 44229652  | intron | PPM1B     | protein phosphatase, Mg <sup>2+</sup> /Mn <sup>2+</sup> dependent 1B | mRNA |
| chr3  | 185933815 | 185933863 | intron | TRA2B     | Transformer-2 protein homolog beta                                   | mRNA |
| chr22 | 25086411  | 25086460  | intron | KIAA1671  | KIAA1671                                                             | mRNA |
| chr12 | 131712611 | 131712658 | intron | SFSWAP    | splicing factor SWAP                                                 | mRNA |
| chr17 | 81834199  | 81834240  | intron | PPP1R27   | protein phosphatase 1, regulatory subunit 27                         | mRNA |
| chr2  | 30606984  | 30607016  | intron | LCLAT1    | lysocardiolipin acyltransferase 1                                    | mRNA |
| chr2  | 138568445 | 138568490 | intron | SPOPL     | speckle type BTB/POZ protein like                                    | mRNA |
| chr9  | 87918949  | 87918993  | intron | SPATA31C1 | SPATA31 subfamily C member 1                                         | mRNA |
| chr16 | 10448627  | 10448678  | intron | ATF7IP2   | activating transcription factor 7 interacting protein 2              | mRNA |
| chr19 | 9813350   | 9813399   | intron | FBXL12    | F-box and leucine rich repeat protein 12                             | mRNA |
| chr17 | 4110880   | 4110915   | intron | ZZEF1     | zinc finger ZZ-type and EF-hand domain containing 1                  | mRNA |
| chr19 | 58000396  | 58000427  | intron | ZNF606    | zinc finger protein 606                                              | mRNA |
| chr7  | 151501981 | 151502018 | intron | RHEB      | Ras homolog, mTORC1 binding                                          | mRNA |
| chr15 | 100912467 | 100912519 | intron | ALDH1A3   | aldehyde dehydrogenase 1 family member A3                            | mRNA |
| chr4  | 15358478  | 15358528  | intron | C1QTNF7   | C1q and TNF related 7                                                | mRNA |
| chr16 | 3051190   | 3051236   | intron | MMP25     | matrix metalloproteinase 25                                          | mRNA |
| chr12 | 51202336  | 51202375  | intron | POU6F1    | POU class 6 homeobox 1                                               | mRNA |
| chr8  | 30176792  | 30176824  | intron | DCTN6     | dynactin subunit 6                                                   | mRNA |
| chr21 | 15794857  | 15794909  | intron | USP25     | ubiquitin specific peptidase 25                                      | mRNA |
| chr2  | 229180778 | 229180825 | intron | PID1      | phosphotyrosine interaction domain containing 1                      | mRNA |
| chr6  | 111311973 | 111312007 | intron | REV3L     | REV3 like, DNA directed polymerase zeta catalytic subunit            | mRNA |
| chr3  | 54638639  | 54638694  | intron | CACNA2D3  | calcium voltage-gated channel auxiliary subunit alpha2delta 3        | mRNA |
| chr1  | 77745527  | 77745577  | intron | USP33     | ubiquitin specific peptidase 33                                      | mRNA |
| chr10 | 96134614  | 96134670  | intron | ZNF518A   | zinc finger protein 518A                                             | mRNA |
| chr14 | 104704663 | 104704698 | intron | INF2      | inverted formin, FH2 and WH2 domain containing                       | mRNA |
| chr4  | 158987520 | 158987569 | intron | C4orf45   | chromosome 4 open reading frame 45                                   | mRNA |
| chr1  | 146074581 | 146074636 | intron | NBPF10    | NBPF member 10                                                       | mRNA |
| chr8  | 30414271  | 30414315  | intron | RBPM5     | RNA binding protein, mRNA processing factor                          | mRNA |
| chr22 | 16977670  | 16977726  | intron | GAB4      | GRB2 associated binding protein family member 4                      | mRNA |
| chr14 | 105370527 | 105370557 | intron | PACS2     | phosphofurin acidic cluster sorting protein 2                        | mRNA |
| chr19 | 51355315  | 51355371  | intron | ETFB      | electron transfer flavoprotein subunit beta                          | mRNA |
| chr9  | 21892790  | 21892842  | intron | MTAP      | methylthioadenosine phosphorylase                                    | mRNA |
| chr2  | 177261848 | 177261909 | intron | NFE2L2    | nuclear factor, erythroid 2 like 2                                   | mRNA |
| chr14 | 55581091  | 55581145  | intron | KTN1      | kinectin 1                                                           | mRNA |
| chr16 | 50074800  | 50074858  | intron | HEATR3    | HEAT repeat containing 3                                             | mRNA |
| chr1  | 70226461  | 70226509  | intron | SRSF11    | serine and arginine rich splicing factor 11                          | mRNA |
| chr15 | 45598164  | 45598221  | intron | BLOC1S6   | biogenesis of lysosomal organelles complex 1 subunit 6               | mRNA |
| chr2  | 233700887 | 233700949 | intron | UGT1A8    | UDP glucuronosyltransferase 1 family, polypeptide A8                 | mRNA |
| chr2  | 200890885 | 200890950 | intron | NIF3L1    | NGG1 interacting factor 3 like 1                                     | mRNA |
| chr6  | 36503925  | 36503974  | intron | STK38     | serine/threonine kinase 38                                           | mRNA |
| chr1  | 205748089 | 205748145 | intron | NUCKS1    | nuclear casein kinase and cyclin-dependent kinase substrate 1        | mRNA |
| chr8  | 115570800 | 115570864 | intron | TRPS1     | transcriptional repressor GATA binding 1                             | mRNA |
| chr7  | 158640350 | 158640384 | intron | NCAPG2    | non-SMC condensin II complex subunit G2                              | mRNA |
| chr8  | 11782698  | 11782739  | intron | NEIL2     | nei like DNA glycosylase 2                                           | mRNA |

Supplementary Table S4\_Specific Peaks bound to PURa in CLIP-seq\_PURa vs IgG

|       |           |           |        |          |                                                                         |      |
|-------|-----------|-----------|--------|----------|-------------------------------------------------------------------------|------|
| chr2  | 3515579   | 3515629   | intron | ADII     | acireductone dioxygenase 1                                              | mRNA |
| chr1  | 120432693 | 120432759 | intron | NBPF8    | NBPF member 8                                                           | mRNA |
| chr5  | 45575681  | 45575744  | intron | HCN1     | hyperpolarization activated cyclic nucleotide gated potassium channel 1 | mRNA |
| chr1  | 86350440  | 86350485  | intron | ODF2L    | outer dense fiber of sperm tails 2 like                                 | mRNA |
| chr11 | 71477302  | 71477338  | intron | NADSYN1  | NAD synthetase 1                                                        | mRNA |
| chr2  | 210026515 | 210026563 | intron | KANSL1L  | KAT8 regulatory NSL complex subunit 1 like                              | mRNA |
| chr1  | 186412028 | 186412093 | intron | ODR4     | odr-4 GPCR localization factor homolog                                  | mRNA |
| chr14 | 51644309  | 51644366  | intron | FRMD6    | FERM domain containing 6                                                | mRNA |
| chr14 | 21263136  | 21263206  | intron | HNRNPC   | heterogeneous nuclear ribonucleoprotein C                               | mRNA |
| chr1  | 223770200 | 223770254 | intron | CAPN2    | calpain 2                                                               | mRNA |
| chr18 | 80012968  | 80013039  | intron | TXNL4A   | thioredoxin like 4A                                                     | mRNA |
| chr1  | 151213417 | 151213455 | intron | PIP5K1A  | phosphatidylinositol-4-phosphate 5-kinase type 1 alpha                  | mRNA |
| chr6  | 79201778  | 79201820  | intron | HMG3     | high mobility group nucleosomal binding domain 3                        | mRNA |
| chr5  | 180809779 | 180809834 | intron | MGAT1    | alpha-1,3-mannosyl-glycoprotein 2-beta-N-acetylglucosaminyltransferase  | mRNA |
| chr1  | 207767464 | 207767534 | intron | CD46     | CD46 molecule                                                           | mRNA |
| chr5  | 17222728  | 17222802  | intron | BASP1    | brain abundant, membrane attached signal protein 1                      | mRNA |
| chr6  | 16263090  | 16263149  | intron | GMPR     | guanosine monophosphate reductase                                       | mRNA |
| chr17 | 5431929   | 5431997   | intron | RPAIN    | RPA interacting protein                                                 | mRNA |
| chr14 | 96533445  | 96533521  | intron | PAPOLA   | poly(A) polymerase alpha                                                | mRNA |
| chr14 | 64523597  | 64523673  | intron | ZBTB1    | zinc finger and BTB domain containing 1                                 | mRNA |
| chr7  | 98304469  | 98304529  | intron | BAIAP2L1 | BAR/IMD domain containing adaptor protein 2 like 1                      | mRNA |
| chr8  | 140902739 | 140902792 | intron | PTK2     | protein tyrosine kinase 2                                               | mRNA |
| chr22 | 49573086  | 49573136  | intron | C22orf34 | chromosome 22 open reading frame 34                                     | mRNA |
| chr14 | 55283842  | 55283911  | intron | FBXO34   | F-box protein 34                                                        | mRNA |
| chr17 | 46938853  | 46938923  | intron | GOSR2    | golgi SNAP receptor complex member 2                                    | mRNA |
| chr8  | 79956616  | 79956675  | intron | MRPS28   | mitochondrial ribosomal protein S28                                     | mRNA |
| chr15 | 80444536  | 80444591  | intron | ARNT2    | aryl hydrocarbon receptor nuclear translocator 2                        | mRNA |
| chr12 | 50190182  | 50190232  | intron | LIMA1    | LIM domain and actin binding 1                                          | mRNA |
| chr2  | 121479747 | 121479785 | intron | CLASP1   | cytoplasmic linker associated protein 1                                 | mRNA |
| chr13 | 106558199 | 106558231 | intron | ARGLU1   | arginine and glutamate rich 1                                           | mRNA |
| chr19 | 47721197  | 47721266  | intron | EHD2     | EH domain containing 2                                                  | mRNA |
| chr9  | 76175248  | 76175284  | intron | PCSK5    | proprotein convertase subtilisin/kexin type 5                           | mRNA |
| chrX  | 136879191 | 136879273 | intron | RBMX     | RNA binding motif protein X-linked                                      | mRNA |
| chr14 | 21263058  | 21263128  | intron | HNRNPC   | heterogeneous nuclear ribonucleoprotein C                               | mRNA |
| chr1  | 65630324  | 65630354  | intron | LEPR     | leptin receptor                                                         | mRNA |
| chr20 | 5588878   | 5588925   | intron | GPCPD1   | glycerophosphocholine phosphodiesterase 1                               | mRNA |
| chr14 | 21262277  | 21262335  | intron | HNRNPC   | heterogeneous nuclear ribonucleoprotein C                               | mRNA |
| chr11 | 82914102  | 82914154  | intron | DDIAS    | DNA damage induced apoptosis suppressor                                 | mRNA |
| chr12 | 110049571 | 110049636 | intron | C12orf76 | chromosome 12 open reading frame 76                                     | mRNA |
| chr6  | 151948765 | 151948842 | intron | ESR1     | estrogen receptor 1                                                     | mRNA |
| chr2  | 233702907 | 233702953 | intron | UGT1A8   | UDP glucuronosyltransferase 1 family, polypeptide A8                    | mRNA |
| chr3  | 42627549  | 42627601  | intron | NKTR     | natural killer cell triggering receptor                                 | mRNA |
| chr14 | 67938739  | 67938821  | intron | RAD51B   | RAD51 paralogs B                                                        | mRNA |
| chr19 | 6717539   | 6717624   | intron | C3       | complement C3                                                           | mRNA |
| chr7  | 74883112  | 74883166  | intron | STAG3L2  | stromal antigen 3-like 2                                                | mRNA |
| chr22 | 45929771  | 45929843  | intron | WNT7B    | Wnt family member 7B                                                    | mRNA |
| chr8  | 115552248 | 115552285 | intron | TRPS1    | transcriptional repressor GATA binding 1                                | mRNA |
| chr1  | 207769520 | 207769610 | intron | CD46     |                                                                         | mRNA |
| chr18 | 3600204   | 3600249   | intron | DLGAP1   | DLG associated protein 1                                                | mRNA |
| chr17 | 50751847  | 50751913  | intron | LUC7L3   | LUC7 like 3 pre-mRNA splicing factor                                    | mRNA |
| chr2  | 169623034 | 169623091 | intron | PPIG     | peptidylprolyl isomerase G                                              | mRNA |
| chr1  | 103554374 | 103554446 | intron | RNPC3    | RNA binding region (RNP1, RRM) containing 3                             | mRNA |
| chr17 | 47974808  | 47974861  | intron | CDK5RAP3 | CDK5 regulatory subunit associated protein 3                            | mRNA |
| chr7  | 6700343   | 6700390   | intron | ZNF12    | zinc finger protein 12                                                  | mRNA |
| chr1  | 70223407  | 70223501  | intron | SRSF11   | serine and arginine rich splicing factor 11                             | mRNA |
| chr8  | 42534637  | 42534670  | intron | SLC20A2  | solute carrier family 20 member 2                                       | mRNA |
| chr7  | 23530197  | 23530264  | intron | TRA2A    | transformer 2 alpha homolog                                             | mRNA |
| chr7  | 44005215  | 44005301  | intron | SPDYE1   | speedy/RINGO cell cycle regulator family member E1                      | mRNA |
| chr8  | 118285059 | 118285108 | intron | SAMD12   | sterile alpha motif domain containing 12                                | mRNA |
| chr8  | 118247959 | 118248058 | intron | SAMD12   | sterile alpha motif domain containing 12                                | mRNA |
| chr15 | 45598265  | 45598363  | intron | BLOC1S6  | biogenesis of lysosomal organelles complex 1 subunit 6                  | mRNA |

Supplementary Table S4\_Specific Peaks bound to PURa in CLIP-seq\_PURa vs IgG

|       |           |           |        |          |                                                                                   |      |
|-------|-----------|-----------|--------|----------|-----------------------------------------------------------------------------------|------|
| chr16 | 85706687  | 85706764  | intron | C16orf74 | chromosome 16 open reading frame 74                                               | mRNA |
| chr16 | 81626446  | 81626548  | intron | CMIP     | c-Maf inducing protein                                                            | mRNA |
| chr1  | 110344017 | 110344093 | intron | RBM15    | RNA binding motif protein 15                                                      | mRNA |
| chr2  | 227528930 | 227529021 | intron | AGFG1    | ArfGAP with FG repeats 1                                                          | mRNA |
| chr22 | 46382095  | 46382198  | intron | CELSR1   | cadherin EGF LAG seven-pass G-type receptor 1                                     | mRNA |
| chr2  | 197419895 | 197419927 | intron | SF3B1    | splicing factor 3b subunit 1                                                      | mRNA |
| chr13 | 110899432 | 110899486 | intron | ANKRD10  | ankyrin repeat domain 10                                                          | mRNA |
| chr1  | 1737226   | 1737315   | intron | SLC35E2A | solute carrier family 35 member E2A                                               | mRNA |
| chr17 | 59839295  | 59839388  | intron | VMP1     | vacuole membrane protein 1                                                        | mRNA |
| chr11 | 62530347  | 62530410  | intron | AHNAK    | AHNAK nucleoprotein                                                               | mRNA |
| chr1  | 234407990 | 234408035 | intron | TARBP1   | TAR (HIV-1) RNA binding protein 1                                                 | mRNA |
| chr19 | 47719983  | 47720037  | intron | EHD2     | EH domain containing 2                                                            | mRNA |
| chr8  | 118292322 | 118292436 | intron | SAMD12   | sterile alpha motif domain containing 12                                          | mRNA |
| chr8  | 118279150 | 118279214 | intron | SAMD12   | sterile alpha motif domain containing 12                                          | mRNA |
| chr16 | 87738382  | 87738462  | intron | KLHDC4   | kelch domain containing 4                                                         | mRNA |
| chr17 | 59839571  | 59839672  | intron | VMP1     | vacuole membrane protein 1                                                        | mRNA |
| chr17 | 82146886  | 82146962  | intron | CCDC57   | coiled-coil domain containing 57                                                  | mRNA |
| chr12 | 22668388  | 22668435  | intron | ETNK1    | ethanolamine kinase 1                                                             | mRNA |
| chr2  | 61536942  | 61537039  | intron | XPO1     | exportin 1                                                                        | mRNA |
| chr20 | 34073179  | 34073234  | intron | RALY     | RALY heterogeneous nuclear ribonucleoprotein                                      | mRNA |
| chr8  | 118038993 | 118039113 | intron | EXT1     | exostosin glycosyltransferase 1                                                   | mRNA |
| chr20 | 36137386  | 36137423  | intron | EPB41L1  | erythrocyte membrane protein band 4.1 like 1                                      | mRNA |
| chr2  | 241507    | 241559    | intron | SH3YL1   | SH3 and SYLF domain containing 1                                                  | mRNA |
| chr11 | 65085812  | 65085919  | intron | ZFPL1    | zinc finger protein like 1                                                        | mRNA |
| chr11 | 62529113  | 62529234  | intron | AHNAK    | AHNAK nucleoprotein                                                               | mRNA |
| chr1  | 1052808   | 1052914   | intron | AGR1     | agr1                                                                              | mRNA |
| chr19 | 36213945  | 36213984  | intron | ZNF565   | zinc finger protein 565                                                           | mRNA |
| chr18 | 37075114  | 37075177  | intron | KIAA1328 | KIAA1328                                                                          | mRNA |
| chr20 | 49694844  | 49694935  | intron | B4GALT5  | UDP-Gal:betaGlcNAc beta 1,4- galactosyltransferase, polypeptide 5                 | mRNA |
| chr19 | 36213986  | 36214110  | intron | ZNF565   | zinc finger protein 565                                                           | mRNA |
| chr6  | 142934904 | 142935012 | intron | HIVEP2   | HIVEP zinc finger 2                                                               | mRNA |
| chr20 | 34072860  | 34072924  | intron | RALY     | RALY heterogeneous nuclear ribonucleoprotein                                      | mRNA |
| chr22 | 16980486  | 16980533  | intron | GAB4     | GRB2 associated binding protein family member 4                                   | mRNA |
| chr19 | 49102838  | 49102965  | intron | SNRNP70  | small nuclear ribonucleoprotein U1 subunit 70                                     | mRNA |
| chr17 | 17821094  | 17821161  | intron | SREBF1   | sterol regulatory element binding transcription factor 1                          | mRNA |
| chr3  | 122014951 | 122014986 | intron | ILDR1    | immunoglobulin like domain containing receptor 1                                  | mRNA |
| chr11 | 35194673  | 35194718  | intron | CD44     | CD44 molecule                                                                     | mRNA |
| chr12 | 52237862  | 52237915  | intron | KRT7     | keratin 7                                                                         | mRNA |
| chr12 | 76068630  | 76068700  | intron | NAP1L1   | nucleosome assembly protein 1 like 1                                              | mRNA |
| chr9  | 33347717  | 33347807  | intron | NFX1     | nuclear transcription factor, X-box binding 1                                     | mRNA |
| chr19 | 15331024  | 15331091  | intron | BRD4     | bromodomain containing 4                                                          | mRNA |
| chr7  | 23529570  | 23529613  | intron | TRA2A    | transformer 2 alpha homolog                                                       | mRNA |
| chr20 | 44209672  | 44209756  | intron | OSER1    | oxidative stress responsive serine rich 1                                         | mRNA |
| chrX  | 120438720 | 120438854 | intron | LAMP2    | lysosomal associated membrane protein 2                                           | mRNA |
| chr19 | 40687906  | 40688041  | intron | NUMBL    | NUMB like endocytic adaptor protein                                               | mRNA |
| chr19 | 47721068  | 47721130  | intron | EHD2     | EH domain containing 2                                                            | mRNA |
| chr22 | 38488801  | 38488918  | intron | DDX17    | DEAD-box helicase 17                                                              | mRNA |
| chr22 | 29291001  | 29291079  | intron | EWSR1    | EWS RNA binding protein 1                                                         | mRNA |
| chr5  | 32441433  | 32441499  | intron | ZFR      | zinc finger RNA binding protein                                                   | mRNA |
| chr1  | 43596749  | 43596889  | intron | PTPRF    | protein tyrosine phosphatase receptor type F                                      | mRNA |
| chr20 | 44498607  | 44498748  | intron | SERINC3  | serine incorporator 3                                                             | mRNA |
| chr11 | 33140342  | 33140436  | intron | CSTF3    | cleavage stimulation factor subunit 3                                             | mRNA |
| chr17 | 59837965  | 59838108  | intron | VMP1     | vacuole membrane protein 1                                                        | mRNA |
| chr1  | 20775523  | 20775667  | intron | HP1BP3   |                                                                                   | mRNA |
| chr21 | 38808461  | 38808601  | intron | ETS2     | ETS proto-oncogene 2                                                              | mRNA |
| chr21 | 33530392  | 33530431  | intron | GART     | phosphoribosylglycinamide formyltransferase, phosphoribosylglycinamide synthetase | mRNA |
| chr19 | 40688178  | 40688245  | intron | NUMBL    | NUMB like endocytic adaptor protein                                               | mRNA |
| chr1  | 20774287  | 20774433  | intron | HP1BP3   | heterochromatin protein 1 binding protein 3                                       | mRNA |
| chrX  | 85969516  | 85969564  | intron | CHM      | CHM Rab escort protein                                                            | mRNA |
| chr5  | 171406571 | 171406641 | intron | NPM1     | nucleophosmin 1                                                                   | mRNA |
| chr11 | 62531254  | 62531364  | intron | AHNAK    | AHNAK nucleoprotein                                                               | mRNA |

Supplementary Table S4\_Specific Peaks bound to PURa in CLIP-seq\_PURa vs IgG

|       |           |           |        |          |                                                                              |      |
|-------|-----------|-----------|--------|----------|------------------------------------------------------------------------------|------|
| chr1  | 42850072  | 42850211  | intron | ZNF691   | zinc finger protein 691                                                      | mRNA |
| chr18 | 2686661   | 2686767   | intron | SMCHD1   | structural maintenance of chromosomes flexible hinge domain containing 1     | mRNA |
| chr8  | 118039936 | 118040045 | intron | EXT1     | exostosin glycosyltransferase 1                                              | mRNA |
| chr8  | 51839122  | 51839170  | intron | PCMTD1   | protein-L-isoaspartate (D-aspartate) O-methyltransferase domain containing 1 | mRNA |
| chr15 | 100883033 | 100883102 | intron | ALDH1A3  | aldehyde dehydrogenase 1 family member A3                                    | mRNA |
| chr1  | 1391160   | 1391243   | intron | CCNL2    | cyclin L2                                                                    | mRNA |
| chr8  | 117938884 | 117939033 | intron | EXT1     | exostosin glycosyltransferase 1                                              | mRNA |
| chr1  | 20774611  | 20774699  | intron | HP1BP3   | heterochromatin protein 1 binding protein 3                                  | mRNA |
| chr8  | 118288852 | 118288965 | intron | SAMD12   | sterile alpha motif domain containing 12                                     | mRNA |
| chr9  | 28533     | 28679     | intron | WASHC1   | WASH complex subunit 1                                                       | mRNA |
| chr2  | 85543489  | 85543545  | intron | MAT2A    | methionine adenosyltransferase 2A                                            | mRNA |
| chr17 | 17820892  | 17820943  | intron | SREBF1   | sterol regulatory element binding transcription factor 1                     | mRNA |
| chrX  | 71547730  | 71547789  | intron | OGT      | O-linked N-acetylglucosamine (GlcNAc) transferase                            | mRNA |
| chr20 | 36093175  | 36093263  | intron | EPB41L1  | erythrocyte membrane protein band 4.1 like 1                                 | mRNA |
| chr8  | 23568147  | 23568285  | intron | SLC25A37 | solute carrier family 25 member 37                                           | mRNA |
| chr11 | 64306472  | 64306576  | intron | ESRR     | estrogen related receptor alpha                                              | mRNA |
| chr18 | 3455220   | 3455281   | intron | TGIF1    | TGFB induced factor homeobox 1                                               | mRNA |
| chr8  | 117957785 | 117957885 | intron | EXT1     | exostosin glycosyltransferase 1                                              | mRNA |
| chr6  | 169649755 | 169649886 | intron | WDR27    | WD repeat domain 27                                                          | mRNA |
| chr15 | 85384870  | 85385042  | intron | AKAP13   | A-kinase anchoring protein 13                                                | mRNA |
| chr19 | 36214134  | 36214146  | intron | ZNF565   | zinc finger protein 565                                                      | mRNA |
| chr19 | 36214283  | 36214314  | intron | ZNF565   | zinc finger protein 565                                                      | mRNA |
| chr8  | 118012788 | 118012887 | intron | EXT1     | exostosin glycosyltransferase 1                                              | mRNA |
| chr11 | 62528909  | 62529093  | intron | AHNAK    | AHNAK nucleoprotein                                                          | mRNA |
| chr19 | 47720444  | 47720632  | intron | EHD2     | EH domain containing 2                                                       | mRNA |
| chr6  | 47005508  | 47005697  | intron | ADGRF1   | adhesion G protein-coupled receptor F1                                       | mRNA |
| chr19 | 40688692  | 40688774  | intron | NUMBL    | NUMB like endocytic adaptor protein                                          | mRNA |
| chr19 | 40688775  | 40688882  | intron | NUMBL    | NUMB like endocytic adaptor protein                                          | mRNA |
| chr11 | 70371325  | 70371521  | intron | PPF1A1   | PTPRF interacting protein alpha 1                                            | mRNA |
| chr8  | 118078847 | 118078956 | intron | EXT1     | exostosin glycosyltransferase 1                                              | mRNA |
| chr7  | 47352237  | 47352366  | intron | TNS3     | tensin 3                                                                     | mRNA |
| chr11 | 62517725  | 62517927  | intron | AHNAK    | AHNAK nucleoprotein                                                          | mRNA |
| chr11 | 1745744   | 1745847   | intron | IFITM10  | interferon induced transmembrane protein 10                                  | mRNA |
| chr5  | 882176    | 882268    | intron | BRD9     | bromodomain containing 9                                                     | mRNA |
| chr12 | 54285911  | 54285967  | intron | HNRNPA1  | heterogeneous nuclear ribonucleoprotein A1                                   | mRNA |
| chr19 | 36215292  | 36215475  | intron | ZNF146   | zinc finger protein 146                                                      | mRNA |
| chr7  | 44005005  | 44005167  | intron | SPDYE1   | speedy/RINGO cell cycle regulator family member E1                           | mRNA |
| chr16 | 87738579  | 87738663  | intron | KLHDC4   | kelch domain containing 4                                                    | mRNA |
| chrX  | 151973532 | 151973751 | intron | GABRE    | gamma-aminobutyric acid type A receptor epsilon subunit                      | mRNA |
| chr20 | 44498755  | 44498824  | intron | SERINC3  | serine incorporator 3                                                        | mRNA |
| chr20 | 44498825  | 44498884  | intron | SERINC3  | serine incorporator 3                                                        | mRNA |
| chr20 | 44498886  | 44498989  | intron | SERINC3  | serine incorporator 3                                                        | mRNA |
| chr8  | 118296799 | 118296876 | intron | SAMD12   | sterile alpha motif domain containing 12                                     | mRNA |
| chr13 | 106559090 | 106559203 | intron | ARGLU1   | arginine and glutamate rich 1                                                | mRNA |
| chr8  | 117979481 | 117979527 | intron | EXT1     | exostosin glycosyltransferase 1                                              | mRNA |
| chr11 | 62529507  | 62529650  | intron | AHNAK    | AHNAK nucleoprotein                                                          | mRNA |
| chr7  | 55067991  | 55068033  | intron | EGFR     | epidermal growth factor receptor                                             | mRNA |
| chr7  | 47351882  | 47351972  | intron | TNS3     | tensin 3                                                                     | mRNA |
| chr20 | 45479013  | 45479225  | intron | WFDC2    | WAP four-disulfide core domain 2                                             | mRNA |
| chr18 | 3594772   | 3594912   | intron | DLGAP1   | DLG associated protein 1                                                     | mRNA |
| chr11 | 62517929  | 62518198  | intron | AHNAK    | AHNAK nucleoprotein                                                          | mRNA |
| chr16 | 87741814  | 87742004  | intron | KLHDC4   | kelch domain containing 4                                                    | mRNA |
| chr5  | 139284162 | 139284241 | intron | MATR3    | matrin 3                                                                     | mRNA |
| chr18 | 35246782  | 35246835  | intron | ZNF397   | zinc finger protein 397                                                      | mRNA |
| chr13 | 113215029 | 113215120 | intron | CUL4A    | cullin 4A                                                                    | mRNA |
| chr8  | 117989580 | 117989853 | intron | EXT1     | exostosin glycosyltransferase 1                                              | mRNA |
| chr3  | 48425838  | 48425958  | intron | PLXNB1   | plexin B1                                                                    | mRNA |
| chr11 | 71484619  | 71484925  | intron | NADSYN1  | NAD synthetase 1                                                             | mRNA |
| chr17 | 59838854  | 59839031  | intron | VMP1     | vacuole membrane protein 1                                                   | mRNA |
| chr20 | 44499259  | 44499317  | intron | SERINC3  | serine incorporator 3                                                        | mRNA |
| chr20 | 44498996  | 44499119  | intron | SERINC3  | serine incorporator 3                                                        | mRNA |

Supplementary Table S4\_Specific Peaks bound to PURa in CLIP-seq\_PURa vs IgG

|       |           |           |             |           |                                                              |      |
|-------|-----------|-----------|-------------|-----------|--------------------------------------------------------------|------|
| chr11 | 1746050   | 1746144   | intron      | IFITM10   | interferon induced transmembrane protein 10                  | mRNA |
| chr11 | 62532524  | 62532729  | intron      | AHNAK     | AHNAK nucleoprotein                                          | mRNA |
| chr20 | 36094149  | 36094211  | intron      | EPB41L1   | erythrocyte membrane protein band 4.1 like 1                 | mRNA |
| chr20 | 36094302  | 36094449  | intron      | EPB41L1   | erythrocyte membrane protein band 4.1 like 1                 | mRNA |
| chr16 | 31187071  | 31187250  | intron      | FUS       | FUS RNA binding protein                                      | mRNA |
| chr16 | 31187252  | 31187415  | intron      | FUS       | FUS RNA binding protein                                      | mRNA |
| chr11 | 62516716  | 62516755  | intron      | AHNAK     | AHNAK nucleoprotein                                          | mRNA |
| chr11 | 62516767  | 62517112  | intron      | AHNAK     | AHNAK nucleoprotein                                          | mRNA |
| chr19 | 47720642  | 47720770  | intron      | EHD2      | EH domain containing 2                                       | mRNA |
| chr1  | 12582607  | 12582844  | intron      | DHRS3     | dehydrogenase/reductase 3                                    | mRNA |
| chr11 | 70408269  | 70408361  | intron      | CTTN      | cortactin                                                    | mRNA |
| chr11 | 62516343  | 62516494  | intron      | AHNAK     | AHNAK nucleoprotein                                          | mRNA |
| chr8  | 118042615 | 118042857 | intron      | EXT1      | exostosin glycosyltransferase 1                              | mRNA |
| chr8  | 118356966 | 118357075 | intron      | SAMD12    | sterile alpha motif domain containing 12                     | mRNA |
| chr9  | 134339817 | 134340099 | intron      | RXRA      | retinoid X receptor, alpha                                   | mRNA |
| chr1  | 43596959  | 43597330  | intron      | PTPRF     | protein tyrosine phosphatase receptor type F                 | mRNA |
| chr11 | 70421914  | 70422157  | intron      | CTTN      | cortactin                                                    | mRNA |
| chr11 | 70422158  | 70422290  | intron      | CTTN      | cortactin                                                    | mRNA |
| chr11 | 70422291  | 70422577  | intron      | CTTN      | cortactin                                                    | mRNA |
| chr5  | 882730    | 883050    | intron      | BRD9      | bromodomain containing 9                                     | mRNA |
| chr1  | 70231445  | 70231545  | intron      | SRSF11    | serine and arginine rich splicing factor 1                   | mRNA |
| chr21 | 37059189  | 37059232  | intron      | PIGP      | phosphatidylinositol glycan anchor biosynthesis class P      | mRNA |
| chr17 | 59840952  | 59841166  | three_prime | VMP1      | vacuole membrane protein 1                                   | mRNA |
| chr2  | 202206714 | 202206802 | three_prime | SUMO1     | small ubiquitin like modifier 1                              | mRNA |
| chr13 | 48261307  | 48261482  | three_prime | ITM2B     | integral membrane protein 2B                                 | mRNA |
| chr13 | 48261528  | 48261637  | three_prime | ITM2B     | integral membrane protein 2B                                 | mRNA |
| chr3  | 179398456 | 179398465 | three_prime | GNB4      | G protein subunit beta 4                                     | mRNA |
| chr9  | 132594181 | 132594198 | three_prime | DDX31     | DEAD-box helicase 31                                         | mRNA |
| chr19 | 48705316  | 48705336  | three_prime | FUT2      | fucosyltransferase 2 (secretor status included)              | mRNA |
| chr1  | 114705771 | 114705791 | three_prime | NRAS      | neuroblastoma RAS viral (v-ras) oncogene homolog             | mRNA |
| chr4  | 113761273 | 113761292 | three_prime | CAMK2D    | calcium/calmodulin dependent protein kinase II delta         | mRNA |
| chr1  | 9730463   | 9730483   | three_prime | CLSTN1    | calsyntenin 1                                                | mRNA |
| chr2  | 174337814 | 174337833 | three_prime | SP9       | Sp9 transcription factor                                     | mRNA |
| chr1  | 205303126 | 205303147 | three_prime | NUAK2     | NUAK family kinase 2                                         | mRNA |
| chr11 | 61581070  | 61581090  | three_prime | SYT7      | synaptotagmin 7                                              | mRNA |
| chr3  | 179397901 | 179397922 | three_prime | GNB4      | G protein subunit beta 4                                     | mRNA |
| chrX  | 155260403 | 155260424 | three_prime | RAB39B    | RAB39B, member RAS oncogene family                           | mRNA |
| chr19 | 863413    | 863435    | three_prime | CFD       | complement factor D                                          | mRNA |
| chr1  | 42420316  | 42420339  | three_prime | RIMKLA    | ribosomal modification protein rimK like family member A     | mRNA |
| chr13 | 48710751  | 48710773  | three_prime | CYSLTR2   | cysteinyl leukotriene receptor 2                             | mRNA |
| chr21 | 45515629  | 45515652  | three_prime | SLC19A1   | solute carrier family 19 member 1                            | mRNA |
| chr6  | 55755246  | 55755266  | three_prime | BMP5      | bone morphogenetic protein 5                                 | mRNA |
| chr2  | 96330068  | 96330092  | three_prime | ITPR1L1   | ITPRIP like 1                                                | mRNA |
| chr1  | 65638167  | 65638191  | three_prime | LEPR      | leptin receptor                                              | mRNA |
| chr10 | 118304470 | 118304491 | three_prime | FAM204A   | family with sequence similarity 204 member A                 | mRNA |
| chr3  | 196049311 | 196049335 | three_prime | TFR3      | transferrin receptor                                         | mRNA |
| chr4  | 40157068  | 40157092  | three_prime | N4BP2     | NEDD4 binding protein 2                                      | mRNA |
| chr9  | 6506525   | 6506550   | three_prime | UHRF2     | ubiquitin like with PHD and ring finger domains 2            | mRNA |
| chr4  | 39477348  | 39477373  | three_prime | LIAS      | lipoic acid synthetase                                       | mRNA |
| chr15 | 20532500  | 20532526  | three_prime | GOLGA6L6  | golgin A6 family-like 6                                      | mRNA |
| chr16 | 28536527  | 28536553  | three_prime | NUPR1     | nuclear protein, transcriptional regulator, 1                | mRNA |
| chr10 | 112548435 | 112548461 | three_prime | VTI1A     | vesicle transport through interaction with t-SNAREs 1A       | mRNA |
| chr21 | 37612709  | 37612736  | three_prime | KCNJ6     | potassium channel, inwardly rectifying subfamily J, member 6 | mRNA |
| chr5  | 1222584   | 1222611   | three_prime | SLC6A19   | solute carrier family 6 member 19                            | mRNA |
| chr13 | 25163577  | 25163597  | three_prime | AMER2     | APC membrane recruitment protein 2                           | mRNA |
| chrX  | 3608054   | 3608081   | three_prime | PRKX      | protein kinase, X-linked                                     | mRNA |
| chr4  | 127723789 | 127723814 | three_prime | INTU      | inturned planar cell polarity protein                        | mRNA |
| chr16 | 4804949   | 4804977   | three_prime | GLYR1     | glyoxylate reductase 1 homolog                               | mRNA |
| chrX  | 55181518  | 55181547  | three_prime | MTRNR2L10 | MT-RNR2-like 10                                              | mRNA |
| chr13 | 49492965  | 49492994  | three_prime | SETDB2    | SET domain bifurcated histone lysine methyltransferase 2     | mRNA |
| chr3  | 124905602 | 124905631 | three_prime | MUC13     | mucin 13, cell surface associated                            | mRNA |



Supplementary Table S4\_Specific Peaks bound to PURa in CLIP-seq\_PURa vs IgG

|       |           |           |             |         |                                                               |      |
|-------|-----------|-----------|-------------|---------|---------------------------------------------------------------|------|
| chr9  | 33253853  | 33253881  | three_prime | BAG1    | BCL2 associated athanogene 1                                  | mRNA |
| chr6  | 131894448 | 131894478 | three_prime | ENPP1   | ectonucleotide pyrophosphatase/phosphodiesterase 1            | mRNA |
| chr13 | 27256537  | 27256568  | three_prime | RPL21   | ribosomal protein L21                                         | mRNA |
| chr6  | 122443563 | 122443592 | three_prime | SERINC1 | serine incorporator 1                                         | mRNA |
| chr13 | 29512648  | 29512679  | three_prime | SLC7A1  | solute carrier family 7 member 1                              | mRNA |
| chr11 | 8687216   | 8687244   | three_prime | RPL27A  | ribosomal protein L27a                                        | mRNA |
| chr8  | 55524598  | 55524629  | three_prime | XKR4    | XK, Kell blood group complex subunit-related family, member 4 | mRNA |
| chr9  | 34368301  | 34368330  | three_prime | MYORG   | myogenesis regulating glycosidase                             | mRNA |
| chr12 | 55995423  | 55995452  | three_prime | RAB5B   | RAB5B, member RAS oncogene family                             | mRNA |
| chr7  | 38724748  | 38724779  | three_prime | VPS41   | VPS41 subunit of HOPS complex                                 | mRNA |
| chr11 | 108368220 | 108368251 | three_prime | ATM     | ATM serine/threonine kinase,                                  | mRNA |
| chr17 | 37611993  | 37612022  | three_prime | DDX52   | DEXD-box helicase 52                                          | mRNA |
| chr2  | 60797730  | 60797762  | three_prime | PAPOLG  | poly(A) polymerase gamma                                      | mRNA |
| chr7  | 121350032 | 121350065 | three_prime | FAM3C   | family with sequence similarity 3 member C                    | mRNA |
| chr13 | 51763565  | 51763596  | three_prime | WDFY2   | WD repeat and FYVE domain containing 2                        | mRNA |
| chr18 | 32070211  | 32070238  | three_prime | RNF125  | ring finger protein 125                                       | mRNA |
| chr1  | 166913934 | 166913966 | three_prime | ILDR2   | immunoglobulin like domain containing receptor 2              | mRNA |
| chr3  | 191267693 | 191267726 | three_prime | UTS2B   | Urotensin 2B                                                  | mRNA |
| chr19 | 6663293   | 6663321   | three_prime | TNFSF14 | TNF superfamily member 14                                     | mRNA |
| chr11 | 2131835   | 2131859   | three_prime | IGF2    | insulin like growth factor 2                                  | mRNA |
| chr12 | 121651133 | 121651164 | three_prime | MORN3   | MORN repeat containing 3                                      | mRNA |
| chr1  | 160029538 | 160029571 | three_prime | PIGM    | phosphatidylinositol glycan anchor biosynthesis, class M      | mRNA |
| chr12 | 121185904 | 121185932 | three_prime | P2RX7   | purinergic receptor P2X 7                                     | mRNA |
| chr5  | 14696868  | 14696902  | three_prime | OTULIN  | OTU deubiquitinase with linear linkage specificity            | mRNA |
| chr11 | 74978533  | 74978567  | three_prime | SPCS2   | signal peptidase complex subunit 2                            | mRNA |
| chr12 | 49273904  | 49273938  | three_prime | TUBA1C  | tubulin alpha 1c                                              | mRNA |
| chr14 | 90526103  | 90526134  | three_prime | TTC7B   | tetratricopeptide repeat domain 7B                            | mRNA |
| chr17 | 82489810  | 82489833  | three_prime | NARF    | nuclear prelamin A recognition factor                         | mRNA |
| chr13 | 27256536  | 27256568  | three_prime | RPL21   | ribosomal protein L21                                         | mRNA |
| chr18 | 46669886  | 46669909  | three_prime | ST8SIA5 | ST8 alpha-N-acetyl-neuraminide alpha-2,8-sialyltransferase 5  | mRNA |
| chr2  | 241352048 | 241352083 | three_prime | SEPTIN2 | septin 2                                                      | mRNA |
| chr1  | 150996217 | 150996252 | three_prime | DHCR24  | 24-dehydrocholesterol reductase                               | mRNA |
| chr1  | 182383683 | 182383713 | three_prime | GLUL    | glutamate-ammonia ligase                                      | mRNA |
| chr1  | 248918944 | 248918975 | three_prime | PGBD2   | piggyBac transposable element derived 2                       | mRNA |
| chr9  | 88475726  | 88475761  | three_prime | SPIN1   | spindlin 1                                                    | mRNA |
| chr11 | 101998391 | 101998422 | three_prime | CEP126  | centrosomal protein 126                                       | mRNA |
| chr11 | 74978583  | 74978617  | three_prime | SPCS2   | signal peptidase complex subunit 2                            | mRNA |
| chr12 | 121020302 | 121020334 | three_prime | OASL    | 2'-5'-oligoadenylate synthetase like                          | mRNA |
| chr20 | 3805940   | 3805975   | three_prime | CDC25B  | cell division cycle 25B                                       | mRNA |
| chr1  | 160216297 | 160216332 | three_prime | DCAF8   | DDB1 and CUL4 associated factor 8                             | mRNA |
| chr8  | 143655073 | 143655108 | three_prime | ZNF623  | zinc finger protein 623                                       | mRNA |
| chr20 | 49096726  | 49096762  | three_prime | CSE1L   | chromosome segregation 1 like                                 | mRNA |
| chr6  | 100858643 | 100858673 | three_prime | ASCC3   | activating signal cointegrator 1 complex subunit 3            | mRNA |
| chr1  | 226226432 | 226226463 | three_prime | MIXL1   | Mix paired-like homeobox                                      | mRNA |
| chr4  | 69723810  | 69723846  | three_prime | SULT1B1 | sulfotransferase family 1B member 1                           | mRNA |
| chr5  | 176379334 | 176379370 | three_prime | ARL10   | ADP-ribosylation factor-like 10                               | mRNA |
| chr19 | 5891423   | 5891455   | three_prime | NDUFA11 | NADH:ubiquinone oxidoreductase subunit A11                    | mRNA |
| chr2  | 70279584  | 70279616  | three_prime | PCYOX1  | prenylcysteine oxidase 1                                      | mRNA |
| chr7  | 40096640  | 40096659  | three_prime | CDK13   | cyclin dependent kinase 13                                    | mRNA |
| chrX  | 107064741 | 107064770 | three_prime | RBM41   | RNA binding motif protein 41                                  | mRNA |
| chr19 | 11146895  | 11146931  | three_prime | SPC24   | SPC24 component of NDC80 kinetochore complex                  | mRNA |
| chr3  | 49533725  | 49533761  | three_prime | DAG1    | dystroglycan 1                                                | mRNA |
| chr5  | 144478901 | 144478938 | three_prime | KCTD16  | potassium channel tetramerization domain containing 16        | mRNA |
| chr19 | 46467325  | 46467361  | three_prime | PNMA8A  | PNMA family member 8A                                         | mRNA |
| chr3  | 46669200  | 46669234  | three_prime | ALS2CL  | ALS2 C-terminal like                                          | mRNA |
| chr16 | 75474445  | 75474479  | three_prime | CHST6   | carbohydrate sulfotransferase 6                               | mRNA |
| chr19 | 8509850   | 8509887   | three_prime | ZNF414  | zinc finger protein 414                                       | mRNA |
| chr20 | 37983142  | 37983179  | three_prime | TTI1    | TELO2 interacting protein 1                                   | mRNA |
| chr14 | 102498851 | 102498881 | three_prime | TECPR2  | tectonin beta-propeller repeat containing 2                   | mRNA |
| chr6  | 89163800  | 89163837  | three_prime | PM20D2  | peptidase M20 domain containing 2                             | mRNA |
| chr19 | 48600823  | 48600853  | three_prime | FAM83E  | family with sequence similarity 83, member E                  | mRNA |

Supplementary Table S4\_Specific Peaks bound to PURa in CLIP-seq\_PURa vs IgG

|       |           |           |             |          |                                                                        |      |
|-------|-----------|-----------|-------------|----------|------------------------------------------------------------------------|------|
| chr3  | 100180318 | 100180353 | three_prime | CMSS1    | cms1 ribosomal small subunit homolog                                   | mRNA |
| chr1  | 65231288  | 65231323  | three_prime | AK4      | adenylate kinase 4                                                     | mRNA |
| chr9  | 136207332 | 136207371 | three_prime | QSOX2    | quiescinc sulfhydryl oxidase 2                                         | mRNA |
| chr5  | 137752856 | 137752893 | three_prime | HNRNPA0  | heterogeneous nuclear ribonucleoprotein A0                             | mRNA |
| chr6  | 142444751 | 142444790 | three_prime | ADGRG6   | adhesion G protein-coupled receptor G6                                 | mRNA |
| chr2  | 88110878  | 88110910  | three_prime | SMYD1    | SET and MYND domain containing 1                                       | mRNA |
| chr1  | 92398298  | 92398332  | three_prime | RPAP2    | RNA polymerase II associated protein 2                                 | mRNA |
| chr22 | 46362665  | 46362704  | three_prime | CELSR1   | cadherin EGF LAG seven-pass G-type receptor 1                          | mRNA |
| chrX  | 24076799  | 24076839  | three_prime | EIF2S3   | eukaryotic translation initiation factor 2 subunit gamma               | mRNA |
| chr5  | 116446245 | 116446283 | three_prime | SEMA6A   | semaphorin 6A                                                          | mRNA |
| chr3  | 49415495  | 49415520  | three_prime | TCTA     | T-cell leukemia translocation altered                                  | mRNA |
| chr12 | 54546173  | 54546197  | three_prime | NCKAP1L  | NCK associated protein 1 like                                          | mRNA |
| chr10 | 119167785 | 119167821 | three_prime | PRDX3    | peroxiredoxin 3                                                        | mRNA |
| chr11 | 111295163 | 111295201 | three_prime | COLCA1   | colorectal cancer associated 1                                         | mRNA |
| chr5  | 1050407   | 1050448   | three_prime | SLC12A7  | solute carrier family 12 member 7                                      | mRNA |
| chr18 | 23531789  | 23531823  | three_prime | RMC1     | regulator of MON1-CCZ1                                                 | mRNA |
| chr7  | 40127229  | 40127264  | three_prime | MPLKIP   | M-phase specific PLK1 interacting protein                              | mRNA |
| chr7  | 93101045  | 93101079  | three_prime | SAMD9    | sterile alpha motif domain containing 9                                | mRNA |
| chr7  | 152647040 | 152647080 | three_prime | XRCC2    | X-ray repair complementing defective repair in Chinese hamster cells 2 | mRNA |
| chr3  | 12734086  | 12734127  | three_prime | TMEM40   | transmembrane protein 40                                               | mRNA |
| chr10 | 811232    | 811265    | three_prime | LARP4B   | La ribonucleoprotein 4B                                                | mRNA |
| chr6  | 34279776  | 34279818  | three_prime | NUDT3    | nudix (nucleoside diphosphate linked moiety X)-type motif 3            | mRNA |
| chr6  | 89162542  | 89162584  | three_prime | PM20D2   | peptidase M20 domain containing 2                                      | mRNA |
| chr5  | 65669615  | 65669655  | three_prime | SGTB     | small glutamine rich tetratricopeptide repeat containing beta          | mRNA |
| chr2  | 11181801  | 11181832  | three_prime | ROCK2    | Rho associated coiled-coil containing protein kinase 2                 | mRNA |
| chr21 | 38301939  | 38301970  | three_prime | KCNJ15   | potassium inwardly rectifying channel subfamily J member 15            | mRNA |
| chr5  | 77431335  | 77431374  | three_prime | WDR41    | WD repeat domain 41                                                    | mRNA |
| chr7  | 152647457 | 152647499 | three_prime | XRCC2    | X-ray repair complementing defective repair in Chinese hamster cells 2 | mRNA |
| chr12 | 10159287  | 10159326  | three_prime | OLR1     | oxidized low density lipoprotein receptor 1                            | mRNA |
| chr17 | 28908490  | 28908528  | three_prime | PHF12    | PHD finger protein 12                                                  | mRNA |
| chr15 | 40662759  | 40662801  | three_prime | KNL1     | kinetochore scaffold 1                                                 | mRNA |
| chr20 | 3926915   | 3926946   | three_prime | PANK2    | pantothenate kinase 2                                                  | mRNA |
| chr2  | 241351991 | 241352033 | three_prime | SEPTIN2  | septin 2                                                               | mRNA |
| chr17 | 82239443  | 82239483  | three_prime | SLC16A3  | solute carrier family 16 member 3                                      | mRNA |
| chr11 | 82729962  | 82729999  | three_prime | FAM181B  | family with sequence similarity 181, member B                          | mRNA |
| chr10 | 73498442  | 73498478  | three_prime | USP54    | ubiquitin specific peptidase 54                                        | mRNA |
| chr20 | 13820509  | 13820545  | three_prime | NDUFAF5  | NADH:ubiquinone oxidoreductase complex assembly factor 5               | mRNA |
| chr9  | 19372740  | 19372783  | three_prime | DENND4C  | DENN domain containing 4C                                              | mRNA |
| chr1  | 179918715 | 179918759 | three_prime | TOR1AIP1 | torsin 1A interacting protein 1                                        | mRNA |
| chr1  | 32042769  | 32042813  | three_prime | KHDRBS1  | KH RNA binding domain containing, signal transduction associated 1     | mRNA |
| chr17 | 1706573   | 1706617   | three_prime | TLCD2    | TLC domain containing 2                                                | mRNA |
| chr5  | 177065869 | 177065913 | three_prime | ZNF346   | zinc finger protein 346                                                | mRNA |
| chr6  | 106569242 | 106569284 | three_prime | CRYBG1   | crystallin beta-gamma domain containing 1                              | mRNA |
| chr1  | 25861979  | 25862022  | three_prime | PAQR7    | progesterin and adipoQ receptor family member VII                      | mRNA |
| chr3  | 119669577 | 119669621 | three_prime | COX17    | cytochrome c oxidase copper chaperone COX17                            | mRNA |
| chrX  | 18239825  | 18239865  | three_prime | SCML2    | Scm polycomb group protein like 2                                      | mRNA |
| chr19 | 11783066  | 11783103  | three_prime | ZNF441   | zinc finger protein 441                                                | mRNA |
| chr19 | 34507186  | 34507229  | three_prime | WTIP     | WT1 interacting protein                                                | mRNA |
| chr1  | 220058686 | 220058727 | three_prime | BPNT1    | 3'(2'), 5'-bisphosphate nucleotidase 1                                 | mRNA |
| chr1  | 15568691  | 15568733  | three_prime | DNAJC16  | DnaJ heat shock protein family (Hsp40) member C16                      | mRNA |
| chr7  | 13892750  | 13892794  | three_prime | ETV1     | ETS variant transcription factor 1                                     | mRNA |
| chr6  | 115939663 | 115939708 | three_prime | FRK      | fyn-related Src family tyrosine kinase                                 | mRNA |
| chr8  | 22005656  | 22005701  | three_prime | XPO7     | exportin 7                                                             | mRNA |
| chr19 | 52293131  | 52293169  | three_prime | ZNF766   | zinc finger protein 766                                                | mRNA |
| chr17 | 4143341   | 4143377   | three_prime | CYB5D2   | cytochrome b5 domain containing 2                                      | mRNA |
| chr2  | 27155709  | 27155745  | three_prime | TCF23    | transcription factor 23                                                | mRNA |
| chr19 | 5206283   | 5206329   | three_prime | PTPRS    | protein tyrosine phosphatase receptor type S                           | mRNA |
| chr16 | 68833852  | 68833897  | three_prime | CDH1     | cadherin 1                                                             | mRNA |
| chr1  | 39004450  | 39004495  | three_prime | AKIRIN1  | akirin 1                                                               | mRNA |
| chr2  | 230819798 | 230819836 | three_prime | CAB39    | calcium binding protein 39                                             | mRNA |
| chr3  | 101225399 | 101225435 | three_prime | IMPG2    | interphotoreceptor matrix proteoglycan 2                               | mRNA |

Supplementary Table S4\_Specific Peaks bound to PURa in CLIP-seq\_PURa vs IgG

|       |           |           |             |         |                                                                                   |      |
|-------|-----------|-----------|-------------|---------|-----------------------------------------------------------------------------------|------|
| chr19 | 42227864  | 42227909  | three_prime | ZNF526  | zinc finger protein 526                                                           | mRNA |
| chrX  | 16763105  | 16763151  | three_prime | SYAP1   | synapse associated protein 1                                                      | mRNA |
| chr9  | 83938920  | 83938963  | three_prime | C9orf64 | chromosome 9 open reading frame 64                                                | mRNA |
| chr18 | 74585809  | 74585840  | three_prime | CNDP1   | carnosine dipeptidase 1                                                           | mRNA |
| chr19 | 55230266  | 55230312  | three_prime | PPP6R1  | protein phosphatase 6 regulatory subunit 1                                        | mRNA |
| chr6  | 122443503 | 122443550 | three_prime | SERINC1 | serine incorporator 1                                                             | mRNA |
| chr3  | 41239941  | 41239986  | three_prime | CTNNB1  | catenin beta 1                                                                    | mRNA |
| chr5  | 177331689 | 177331736 | three_prime | LMAN2   | lectin, mannose binding 2                                                         | mRNA |
| chr1  | 156465657 | 156465698 | three_prime | MEF2D   | myocyte enhancer factor 2D                                                        | mRNA |
| chr15 | 98963173  | 98963220  | three_prime | IGF1R   | insulin like growth factor 1 receptor                                             | mRNA |
| chr3  | 100364704 | 100364751 | three_prime | TOMM70A | translocase of outer mitochondrial membrane 70 homolog A ( <i>S. cerevisiae</i> ) | mRNA |
| chr3  | 188879816 | 188879858 | three_prime | LPP     | LIM domain containing preferred translocation partner in lipoma                   | mRNA |
| chr11 | 74977220  | 74977267  | three_prime | SPCS2   | signal peptidase complex subunit 2                                                | mRNA |
| chr12 | 113390317 | 113390364 | three_prime | PLBD2   | phospholipase B domain containing 2                                               | mRNA |
| chr1  | 114584776 | 114584808 | three_prime | DENND2C | DENN domain containing 2C                                                         | mRNA |
| chr5  | 314621    | 314669    | three_prime | PDCD6   | programmed cell death 6                                                           | mRNA |
| chr1  | 161071920 | 161071965 | three_prime | NECTIN4 | nectin cell adhesion molecule 4                                                   | mRNA |
| chr11 | 119118428 | 119118471 | three_prime | C2CD2L  | C2CD2 like                                                                        | mRNA |
| chr6  | 73827914  | 73827960  | three_prime | CD109   | CD109 molecule                                                                    | mRNA |
| chr7  | 6402532   | 6402580   | three_prime | RAC1    | Rac family small GTPase 1                                                         | mRNA |
| chr11 | 34100012  | 34100060  | three_prime | CAPRN1  | cell cycle associated protein 1                                                   | mRNA |
| chr14 | 53949961  | 53950002  | three_prime | BMP4    | bone morphogenetic protein 4                                                      | mRNA |
| chr12 | 133019474 | 133019517 | three_prime | ZNF26   | zinc finger protein 26                                                            | mRNA |
| chr10 | 38122607  | 38122638  | three_prime | ZNF37A  | zinc finger protein 37A                                                           | mRNA |
| chr8  | 61625891  | 61625937  | three_prime | ASPH    | aspartate beta-hydroxylase                                                        | mRNA |
| chr15 | 52548119  | 52548157  | three_prime | ARPP19  | cAMP regulated phosphoprotein 19                                                  | mRNA |
| chr7  | 116797014 | 116797063 | three_prime | MET     | MET proto-oncogene, receptor tyrosine kinase                                      | mRNA |
| chr11 | 118354501 | 118354549 | three_prime | CD3G    | CD3G molecule                                                                     | mRNA |
| chr16 | 4383339   | 4383388   | three_prime | VASN    | vasorin                                                                           | mRNA |
| chr9  | 21330118  | 21330162  | three_prime | KLHL9   | kelch-like family member 9                                                        | mRNA |
| chr8  | 125022234 | 125022280 | three_prime | SQLE    | squalene epoxidase                                                                | mRNA |
| chr3  | 196051058 | 196051108 | three_prime | TFR3    | transferrin receptor                                                              | mRNA |
| chr1  | 246767365 | 246767410 | three_prime | SCCPDH  | saccharopine dehydrogenase (putative)                                             | mRNA |
| chr11 | 65637385  | 65637417  | three_prime | PCNX3   | pecanex 3                                                                         | mRNA |
| chr5  | 157786562 | 157786610 | three_prime | CLINT1  | clathrin interactor 1                                                             | mRNA |
| chr6  | 158632512 | 158632563 | three_prime | TMEM181 | transmembrane protein 181                                                         | mRNA |
| chr14 | 77510270  | 77510321  | three_prime | SPTLC2  | serine palmitoyltransferase long chain base subunit 2                             | mRNA |
| chr11 | 33354647  | 33354685  | three_prime | HIPK3   | homeodomain interacting protein kinase 3                                          | mRNA |
| chr7  | 94668141  | 94668192  | three_prime | PEG10   | paternally expressed 10                                                           | mRNA |
| chr12 | 112508815 | 112508866 | three_prime | PTPN11  | protein tyrosine phosphatase non-receptor type 11                                 | mRNA |
| chr7  | 16783844  | 16783895  | three_prime | TSPAN13 | tetraspanin 13                                                                    | mRNA |
| chr7  | 66955634  | 66955677  | three_prime | TMEM248 | transmembrane protein 248                                                         | mRNA |
| chr3  | 48443876  | 48443927  | three_prime | TMA7    | translation machinery associated 7 homolog ( <i>S. cerevisiae</i> )               | mRNA |
| chr1  | 111440983 | 111441032 | three_prime | WDR77   | WD repeat domain 77                                                               | mRNA |
| chr1  | 235167390 | 235167433 | three_prime | ARID4B  | AT-rich interaction domain 4B                                                     | mRNA |
| chr16 | 2520097   | 2520145   | three_prime | ATP6V0C | ATPase H+ transporting V0 subunit c                                               | mRNA |
| chr14 | 74736482  | 74736516  | three_prime | FCF1    | FCF1 rRNA-processing protein                                                      | mRNA |
| chr1  | 156525789 | 156525818 | three_prime | IQGAP3  | IQ motif containing GTPase activating protein 3                                   | mRNA |
| chr14 | 70371424  | 70371476  | three_prime | SYNJ2BP | synaptojanin 2 binding protein                                                    | mRNA |
| chr9  | 109018914 | 109018961 | three_prime | TMEM245 | transmembrane protein 245                                                         | mRNA |
| chr8  | 18029111  | 18029161  | three_prime | PCM1    | pericentriolar material 1                                                         | mRNA |
| chr12 | 120460970 | 120461008 | three_prime | GATC    | glutamyl-tRNA amidotransferase subunit C                                          | mRNA |
| chr14 | 55684098  | 55684150  | three_prime | KTN1    | kinectin 1                                                                        | mRNA |
| chr7  | 16783676  | 16783727  | three_prime | TSPAN13 | tetraspanin 13                                                                    | mRNA |
| chr14 | 50905263  | 50905299  | three_prime | PYGL    | glycogen phosphorylase L                                                          | mRNA |
| chr22 | 45843865  | 45843918  | three_prime | ATXN10  | ataxin 10                                                                         | mRNA |
| chr6  | 36602729  | 36602782  | three_prime | SRSF3   | serine and arginine rich splicing factor 3                                        | mRNA |
| chr4  | 105969829 | 105969882 | three_prime | NPNT    | nephronectin                                                                      | mRNA |
| chr11 | 102396443 | 102396491 | three_prime | TMEM123 | transmembrane protein 123                                                         | mRNA |
| chr5  | 175959867 | 175959921 | three_prime | THOC3   | THO complex 3                                                                     | mRNA |
| chr14 | 52640795  | 52640849  | three_prime | ERO1A   | endoplasmic reticulum oxidoreductase 1 alpha                                      | mRNA |

Supplementary Table S4\_Specific Peaks bound to PURa in CLIP-seq\_PURa vs IgG

|       |           |           |             |          |                                                                  |      |
|-------|-----------|-----------|-------------|----------|------------------------------------------------------------------|------|
| chr3  | 101822293 | 101822335 | three_prime | NXPE3    | neurexophilin and PC-esterase domain family member 3             | mRNA |
| chr1  | 32196831  | 32196871  | three_prime | TXLNA    | taxilin alpha                                                    | mRNA |
| chr14 | 105470559 | 105470612 | three_prime | MTA1     | metastasis associated 1                                          | mRNA |
| chr9  | 126697884 | 126697918 | three_prime | LMX1B    | LIM homeobox transcription factor 1 beta                         | mRNA |
| chr6  | 116495813 | 116495854 | three_prime | TRAPPC3L | trafficking protein particle complex 3 like                      | mRNA |
| chr16 | 19310069  | 19310105  | three_prime | CLEC19A  | C-type lectin domain containing 19A                              | mRNA |
| chr11 | 63758621  | 63758673  | three_prime | RTN3     | reticulon 3                                                      | mRNA |
| chr20 | 51598218  | 51598266  | three_prime | ATP9A    | ATPase phospholipid transporting 9A                              | mRNA |
| chr17 | 38727157  | 38727205  | three_prime | MLLT6    | MLLT6, PHD finger containing                                     | mRNA |
| chr19 | 35267898  | 35267944  | three_prime | LSR      | lipolysis stimulated lipoprotein receptor                        | mRNA |
| chr18 | 673388    | 673443    | three_prime | TYMS     | thymidylate synthetase                                           | mRNA |
| chr2  | 26135155  | 26135193  | three_prime | RAB10    | RAB10, member RAS oncogene family                                | mRNA |
| chr2  | 168773287 | 168773342 | three_prime | CERS6    | ceramide synthase 6                                              | mRNA |
| chr16 | 19268116  | 19268171  | three_prime | SYT17    | synaptotagmin 17                                                 | mRNA |
| chrX  | 68042594  | 68042640  | three_prime | OPHN1    | oligophrenin 1                                                   | mRNA |
| chr11 | 791193    | 791248    | three_prime | SLC25A22 | solute carrier family 25 member 22                               | mRNA |
| chr6  | 122781910 | 122781946 | three_prime | FABP7    | fatty acid binding protein 7                                     | mRNA |
| chr13 | 30205606  | 30205661  | three_prime | KATNAL1  | katanin catalytic subunit A1 like 1                              | mRNA |
| chrX  | 46604601  | 46604632  | three_prime | SLC9A7   | solute carrier family 9 member A7                                | mRNA |
| chr19 | 15057691  | 15057734  | three_prime | CASP14   | caspase 14, apoptosis-related cysteine peptidase                 | mRNA |
| chr13 | 42320338  | 42320388  | three_prime | AKAP11   | A kinase (PRKA) anchor protein 11                                | mRNA |
| chr5  | 172952382 | 172952438 | three_prime | ERGIC1   | endoplasmic reticulum-golgi intermediate compartment 1           | mRNA |
| chr17 | 78357136  | 78357184  | three_prime | SOCS3    | suppressor of cytokine signaling 3                               | mRNA |
| chr6  | 158634269 | 158634310 | three_prime | TMEM181  | transmembrane protein 181                                        | mRNA |
| chr12 | 113390839 | 113390888 | three_prime | PLBD2    | phospholipase B domain containing 2                              | mRNA |
| chr8  | 38988354  | 38988410  | three_prime | HTRA4    | HtrA serine peptidase 4                                          | mRNA |
| chr5  | 83054654  | 83054690  | three_prime | TMEM167A | transmembrane protein 167A                                       | mRNA |
| chr1  | 43623527  | 43623584  | three_prime | PTPRF    | protein tyrosine phosphatase receptor type F                     | mRNA |
| chr1  | 153959176 | 153959233 | three_prime | SLC39A1  | solute carrier family 39 member 1                                | mRNA |
| chr1  | 202891706 | 202891763 | three_prime | KLHL12   | kelch like family member 12                                      | mRNA |
| chr6  | 115938997 | 115939033 | three_prime | FRK      | fyn-related Src family tyrosine kinase                           | mRNA |
| chr17 | 59110374  | 59110431  | three_prime | SKA2     | spindle and kinetochore associated complex subunit 2             | mRNA |
| chr20 | 49096669  | 49096724  | three_prime | CSE1L    | chromosome segregation 1 like                                    | mRNA |
| chr17 | 28327136  | 28327188  | three_prime | TMEM97   | transmembrane protein 97                                         | mRNA |
| chr1  | 54638981  | 54639034  | three_prime | ACOT11   | acyl-CoA thioesterase 11                                         | mRNA |
| chr20 | 62388441  | 62388498  | three_prime | RPS21    | ribosomal protein S21                                            | mRNA |
| chr11 | 118750996 | 118751053 | three_prime | DDX6     | DEAD-box helicase 6                                              | mRNA |
| chr1  | 11919679  | 11919734  | three_prime | KIAA2013 | KIAA2013                                                         | mRNA |
| chr3  | 9806475   | 9806516   | three_prime | ARPC4    | actin related protein 2/3 complex subunit 4                      | mRNA |
| chr7  | 2442107   | 2442162   | three_prime | CHST12   | carbohydrate (chondroitin 4) sulfotransferase 12                 | mRNA |
| chr12 | 32645444  | 32645489  | three_prime | FGD4     | FYVE, RhoGEF and PH domain containing 4                          | mRNA |
| chr5  | 179035019 | 179035045 | three_prime | ZNF879   | zinc finger protein 879                                          | mRNA |
| chr3  | 182942706 | 182942727 | three_prime | DCUN1D1  | defective in cullin neddylation 1 domain containing 1            | mRNA |
| chr16 | 89914005  | 89914063  | three_prime | MC1R     | Multi-pass membrane protein (By similarity)                      | mRNA |
| chr1  | 154979119 | 154979174 | three_prime | CKS1B    | CDC28 protein kinase regulatory subunit 1B                       | mRNA |
| chr9  | 98015556  | 98015615  | three_prime | ANP32B   | acidic (leucine-rich) nuclear phosphoprotein 32 family, member B | mRNA |
| chr12 | 53479596  | 53479655  | three_prime | PCBP2    | poly(rC) binding protein 2                                       | mRNA |
| chr5  | 141515877 | 141515910 | three_prime | DIAPH1   | diaphanous related formin 1                                      | mRNA |
| chr3  | 23980017  | 23980074  | three_prime | NR1D2    | nuclear receptor subfamily 1 group D member 2                    | mRNA |
| chr1  | 112671452 | 112671511 | three_prime | CAPZA1   | capping actin protein of muscle Z-line subunit alpha 1           | mRNA |
| chr17 | 4898001   | 4898032   | three_prime | MINK1    | misshapen like kinase 1                                          | mRNA |
| chr12 | 6238009   | 6238057   | three_prime | CD9      | CD9 molecule                                                     | mRNA |
| chr12 | 123597683 | 123597731 | three_prime | TMED2    | transmembrane p24 trafficking protein 2                          | mRNA |
| chr12 | 13216629  | 13216689  | three_prime | EMP1     | epithelial membrane protein 1                                    | mRNA |
| chr8  | 41624003  | 41624039  | three_prime | GPAT4    | glycerol-3-phosphate acyltransferase 4                           | mRNA |
| chr14 | 21210683  | 21210743  | three_prime | HNRNPC   | heterogeneous nuclear ribonucleoprotein C                        | mRNA |
| chr16 | 13239624  | 13239661  | three_prime | SHISA9   | shisa family member 9                                            | mRNA |
| chr17 | 38323042  | 38323086  | three_prime | MRPL45   | mitochondrial ribosomal protein L45                              | mRNA |
| chr19 | 56527272  | 56527305  | three_prime | ZNF471   | zinc finger protein 471                                          | mRNA |
| chr12 | 66121421  | 66121481  | three_prime | LLPH     | LLP homolog, long-term synaptic facilitation factor              | mRNA |
| chr19 | 1778785   | 1778815   | three_prime | ONECUT3  | one cut homeobox 3                                               | mRNA |

Supplementary Table S4\_Specific Peaks bound to PURa in CLIP-seq\_PURa vs IgG

|       |           |           |             |          |                                                               |      |
|-------|-----------|-----------|-------------|----------|---------------------------------------------------------------|------|
| chr5  | 6671000   | 6671060   | three_prime | SRD5A1   | steroid 5 alpha-reductase 1                                   | mRNA |
| chr12 | 92144041  | 92144098  | three_prime | BTG1     | B-cell translocation gene 1, anti-proliferative               | mRNA |
| chr3  | 128620228 | 128620289 | three_prime | RPN1     | ribophorin I                                                  | mRNA |
| chr20 | 32850149  | 32850209  | three_prime | MAPRE1   | microtubule-associated protein, RP/EB family, member 1        | mRNA |
| chr9  | 131577725 | 131577756 | three_prime | RAPGEF1  | Rap guanine nucleotide exchange factor 1                      | mRNA |
| chrX  | 118792292 | 118792341 | three_prime | IL13RA1  | interleukin 13 receptor subunit alpha 1                       | mRNA |
| chr12 | 93506423  | 93506467  | three_prime | MRPL42   | mitochondrial ribosomal protein L42                           | mRNA |
| chr2  | 65088201  | 65088260  | three_prime | RAB1A    | RAB1A, member RAS oncogene family                             | mRNA |
| chr1  | 225790028 | 225790090 | three_prime | SRP9     | signal recognition particle 9                                 | mRNA |
| chr17 | 15539083  | 15539135  | three_prime | TVP23C   | trans-golgi network vesicle protein 23 homolog C              | mRNA |
| chr15 | 24683006  | 24683048  | three_prime | NPAP1    | nuclear pore associated protein 1                             | mRNA |
| chr19 | 5152862   | 5152922   | three_prime | KDM4B    | lysine demethylase 4B                                         | mRNA |
| chr4  | 106043726 | 106043777 | three_prime | TBCK     | TBC1 domain containing kinase                                 | mRNA |
| chr10 | 87753780  | 87753820  | three_prime | ATAD1    | ATPase family AAA domain containing 1                         | mRNA |
| chr1  | 154584489 | 154584544 | three_prime | ADAR     | adenosine deaminase RNA specific                              | mRNA |
| chr19 | 44821367  | 44821414  | three_prime | BCAM     | basal cell adhesion molecule (Lutheran blood group)           | mRNA |
| chr11 | 126202430 | 126202493 | three_prime | RPUSD4   | RNA pseudouridine synthase D4                                 | mRNA |
| chr1  | 24471665  | 24471728  | three_prime | NIPAL3   | NIPA like domain containing 3                                 | mRNA |
| chr12 | 53188391  | 53188430  | three_prime | ZNF740   | zinc finger protein 740                                       | mRNA |
| chr1  | 113975978 | 113976015 | three_prime | HIPK1    | homeodomain interacting protein kinase 1                      | mRNA |
| chr5  | 43706851  | 43706910  | three_prime | NNT      | nicotinamide nucleotide transhydrogenase                      | mRNA |
| chr17 | 74593815  | 74593868  | three_prime | C17orf77 | chromosome 17 open reading frame 77                           | mRNA |
| chr7  | 2437712   | 2437767   | three_prime | CHST12   | carbohydrate (chondroitin 4) sulfotransferase 12              | mRNA |
| chr15 | 94483494  | 94483525  | three_prime | MCTP2    | multiple C2 and transmembrane domain containing 2             | mRNA |
| chr19 | 11450904  | 11450967  | three_prime | PRKCSH   | protein kinase C substrate 80K-H                              | mRNA |
| chr11 | 75405603  | 75405667  | three_prime | RPS3     | ribosomal protein S3                                          | mRNA |
| chr3  | 122575035 | 122575098 | three_prime | DTX3L    | deltex E3 ubiquitin ligase 3L                                 | mRNA |
| chr5  | 97034651  | 97034713  | three_prime | LNPEP    | leucyl and cystinyl aminopeptidase                            | mRNA |
| chr4  | 76160969  | 76161033  | three_prime | SCARB2   | scavenger receptor class B member 2                           | mRNA |
| chr10 | 71302762  | 71302818  | three_prime | UNC5B    | unc-5 netrin receptor B                                       | mRNA |
| chr5  | 42721080  | 42721125  | three_prime | GHR      | growth hormone receptor                                       | mRNA |
| chr2  | 131147030 | 131147093 | three_prime | PLEKHB2  | pleckstrin homology domain containing B2                      | mRNA |
| chr9  | 88575483  | 88575547  | three_prime | NXNL2    | nucleoredoxin like 2                                          | mRNA |
| chr17 | 39997846  | 39997907  | three_prime | PSMD3    | proteasome 26S subunit                                        | mRNA |
| chr8  | 127417532 | 127417595 | three_prime | POU5F1B  | POU class 5 homeobox 1B                                       | mRNA |
| chr1  | 119912491 | 119912556 | three_prime | NOTCH2   | notch receptor 2                                              | mRNA |
| chr5  | 102236582 | 102236647 | three_prime | SLCO4C1  | solute carrier organic anion transporter family, member 4C1   | mRNA |
| chr5  | 161289773 | 161289836 | three_prime | GABRB2   | gamma-aminobutyric acid type A receptor beta2 subunit         | mRNA |
| chr10 | 122438857 | 122438903 | three_prime | PLEKHA1  | pleckstrin homology domain containing A1                      | mRNA |
| chr2  | 232857667 | 232857716 | three_prime | GIGYF2   | GRB10 interacting GYF protein 2                               | mRNA |
| chr1  | 159918550 | 159918616 | three_prime | TAGLN2   | transgelin 2                                                  | mRNA |
| chr19 | 57863571  | 57863631  | three_prime | ZNF587   | zinc finger protein 587                                       | mRNA |
| chr13 | 48261714  | 48261772  | three_prime | ITM2B    | integral membrane protein 2B                                  | mRNA |
| chr13 | 79553688  | 79553739  | three_prime | NDFIP2   | Nedd4 family interacting protein 2                            | mRNA |
| chr17 | 61945216  | 61945275  | three_prime | MED13    | mediator complex subunit 13                                   | mRNA |
| chr11 | 63624888  | 63624947  | three_prime | ATL3     | atlastin GTPase 3                                             | mRNA |
| chr15 | 65887994  | 65888026  | three_prime | RAB11A   | RAB11A, member RAS oncogene family                            | mRNA |
| chr2  | 231400978 | 231401028 | three_prime | B3GNT7   | UDP-GlcNAc:betaGal beta-1,3-N-acetylglucosaminyltransferase 7 | mRNA |
| chr8  | 53968046  | 53968112  | three_prime | TCEA1    | transcription elongation factor A1                            | mRNA |
| chr2  | 200823017 | 200823084 | three_prime | BZW1     | basic leucine zipper and W2 domains 1                         | mRNA |
| chr15 | 98963268  | 98963314  | three_prime | IGF1R    | insulin like growth factor 1 receptor                         | mRNA |
| chr15 | 98963319  | 98963335  | three_prime | IGF1R    | insulin like growth factor 1 receptor                         | mRNA |
| chr12 | 122769834 | 122769895 | three_prime | DENR     | density regulated re-initiation and release factor            | mRNA |
| chr14 | 62109143  | 62109199  | three_prime | SYT16    | synaptotagmin 16                                              | mRNA |
| chr1  | 23795484  | 23795513  | three_prime | LYPLA2   | lysophospholipase 2                                           | mRNA |
| chr6  | 57008625  | 57008662  | three_prime | BEND6    | BEN domain containing 6                                       | mRNA |
| chr1  | 92389543  | 92389602  | three_prime | RPAP2    | RNA polymerase II associated protein 2                        | mRNA |
| chr4  | 112193795 | 112193855 | three_prime | FAM241A  | family with sequence similarity 241 member A                  | mRNA |
| chr1  | 203741174 | 203741216 | three_prime | ATP2B4   | ATPase plasma membrane Ca2+ transporting 4                    | mRNA |
| chr16 | 15409930  | 15409986  | three_prime | MPV17L   | MPV17 mitochondrial membrane protein-like                     | mRNA |
| chr5  | 1461612   | 1461681   | three_prime | LPCAT1   | lysophosphatidylcholine acyltransferase 1                     | mRNA |

Supplementary Table S4\_Specific Peaks bound to PURa in CLIP-seq\_PURa vs IgG

|       |           |           |             |          |                                                                                   |      |
|-------|-----------|-----------|-------------|----------|-----------------------------------------------------------------------------------|------|
| chr7  | 121349777 | 121349846 | three_prime | FAM3C    | family with sequence similarity 3 member C                                        | mRNA |
| chr12 | 13216525  | 13216594  | three_prime | EMP1     | epithelial membrane protein 1                                                     | mRNA |
| chr19 | 36238579  | 36238623  | three_prime | ZNF146   | zinc finger protein 146                                                           | mRNA |
| chr8  | 61502978  | 61503047  | three_prime | ASPH     | aspartate beta-hydroxylase                                                        | mRNA |
| chr3  | 196829964 | 196830033 | three_prime | PAK2     | p21 (RAC1) activated kinase 2                                                     | mRNA |
| chr5  | 97093596  | 97093627  | three_prime | LIX1     | limb and CNS expressed 1                                                          | mRNA |
| chr2  | 70296704  | 70296738  | three_prime | FAM136A  | family with sequence similarity 136 member A                                      | mRNA |
| chr3  | 100364805 | 100364874 | three_prime | TOMM70A  | translocase of outer mitochondrial membrane 70 homolog A ( <i>S. cerevisiae</i> ) | mRNA |
| chr1  | 16396082  | 16396129  | three_prime | SZRD1    | SUZ RNA binding domain containing 1                                               | mRNA |
| chr11 | 110231533 | 110231580 | three_prime | RDX      | radixin, transcript variant 4                                                     | mRNA |
| chr21 | 37202518  | 37202569  | three_prime | TTC3     | tetratricopeptide repeat domain 3                                                 | mRNA |
| chr11 | 35809782  | 35809827  | three_prime | TRIM44   | tripartite motif containing 44                                                    | mRNA |
| chr7  | 135928799 | 135928869 | three_prime | MTPN     | myotrophin                                                                        | mRNA |
| chr3  | 42646929  | 42646987  | three_prime | NKTR     | natural killer cell triggering receptor                                           | mRNA |
| chr7  | 75410828  | 75410876  | three_prime | TRIM73   | tripartite motif containing 73                                                    | mRNA |
| chr1  | 32365343  | 32365411  | three_prime | BSDC1    | BSD domain containing 1                                                           | mRNA |
| chr11 | 34100070  | 34100141  | three_prime | CAPRN1   | cell cycle associated protein 1                                                   | mRNA |
| chr3  | 123492064 | 123492135 | three_prime | HACD2    | 3-hydroxyacyl-CoA dehydratase 2                                                   | mRNA |
| chr13 | 29509490  | 29509561  | three_prime | SLC7A1   | solute carrier family 7 member 1                                                  | mRNA |
| chr11 | 77666058  | 77666097  | three_prime | RSF1     | remodeling and spacing factor 1                                                   | mRNA |
| chr3  | 191267690 | 191267732 | three_prime | UTS2B    | Urotensin 2B                                                                      | mRNA |
| chrX  | 70063837  | 70063867  | three_prime | OTUD6A   | OTU deubiquitinase 6A                                                             | mRNA |
| chr1  | 43622436  | 43622508  | three_prime | PTPRF    | protein tyrosine phosphatase receptor type F                                      | mRNA |
| chr2  | 85321521  | 85321587  | three_prime | TGOLN2   | trans-golgi network protein 2                                                     | mRNA |
| chr8  | 61624730  | 61624802  | three_prime | ASPH     | aspartate beta-hydroxylase                                                        | mRNA |
| chr6  | 113861101 | 113861164 | three_prime | MARCKS   | myristoylated alanine-rich protein kinase C substrate                             | mRNA |
| chr17 | 44034749  | 44034788  | three_prime | LSM12    | LSM12 homolog                                                                     | mRNA |
| chr2  | 182919665 | 182919715 | three_prime | NCKAP1   | NCK associated protein 1                                                          | mRNA |
| chr5  | 160252037 | 160252094 | three_prime | CCNJL    | cyclin J like                                                                     | mRNA |
| chr10 | 78040614  | 78040687  | three_prime | RPS24    | ribosomal protein S24                                                             | mRNA |
| chr15 | 100916292 | 100916364 | three_prime | ALDH1A3  | aldehyde dehydrogenase 1 family member A3                                         | mRNA |
| chr8  | 97852431  | 97852494  | three_prime | LAPTM4B  | lysosomal protein transmembrane 4 beta                                            | mRNA |
| chr11 | 128460108 | 128460173 | three_prime | ETS1     | ETS proto-oncogene 1                                                              | mRNA |
| chr12 | 79774028  | 79774059  | three_prime | PPP1R12A | protein phosphatase 1 regulatory subunit 12A                                      | mRNA |
| chr9  | 112221257 | 112221296 | three_prime | PTBP3    | polypyrimidine tract binding protein 3                                            | mRNA |
| chr9  | 112221297 | 112221330 | three_prime | PTBP3    | polypyrimidine tract binding protein 3                                            | mRNA |
| chr17 | 68531254  | 68531325  | three_prime | PRKAR1A  | protein kinase cAMP-dependent type I regulatory subunit alpha                     | mRNA |
| chr2  | 8858183   | 8858256   | three_prime | MBOAT2   | membrane bound O-acyltransferase domain containing 2                              | mRNA |
| chr5  | 139683824 | 139683862 | three_prime | CXXC5    | CXXC finger protein 5                                                             | mRNA |
| chr2  | 36548683  | 36548755  | three_prime | CRIM1    | cysteine rich transmembrane BMP regulator 1                                       | mRNA |
| chr22 | 39312897  | 39312970  | three_prime | RPL3     | ribosomal protein L3                                                              | mRNA |
| chr10 | 123165193 | 123165246 | three_prime | BUB3     | BUB3 mitotic checkpoint protein                                                   | mRNA |
| chr16 | 81386420  | 81386472  | three_prime | GAN      | gigaxonin                                                                         | mRNA |
| chr20 | 45326979  | 45327053  | three_prime | SDC4     | syndecan 4                                                                        | mRNA |
| chr10 | 103595477 | 103595545 | three_prime | SH3PXD2A | SH3 and PX domains 2A                                                             | mRNA |
| chr12 | 93399922  | 93399969  | three_prime | NUDT4    | nudix hydrolase 4                                                                 | mRNA |
| chr7  | 103099558 | 103099596 | three_prime | ARMC10   | armadillo repeat containing 10                                                    | mRNA |
| chr2  | 177219638 | 177219690 | three_prime | HNRNPA3  | heterogeneous nuclear ribonucleoprotein A3                                        | mRNA |
| chr14 | 105479840 | 105479914 | three_prime | CRIP2    | cysteine rich protein 2                                                           | mRNA |
| chr4  | 173322285 | 173322360 | three_prime | GALNT7   | polypeptide N-acetylgalactosaminyltransferase 7                                   | mRNA |
| chr5  | 179836931 | 179837005 | three_prime | SQSTM1   | sequestosome 1                                                                    | mRNA |
| chr3  | 196049296 | 196049366 | three_prime | TFR3     | transferrin receptor                                                              | mRNA |
| chr11 | 66003930  | 66004005  | three_prime | BANF1    | barrier to autointegration factor 1                                               | mRNA |
| chr12 | 56238757  | 56238801  | three_prime | ANKRD52  | ankyrin repeat domain 52                                                          | mRNA |
| chr2  | 112117306 | 112117366 | three_prime | TMEM87B  | transmembrane protein 87B                                                         | mRNA |
| chr6  | 31830106  | 31830144  | three_prime | HSPA1B   | heat shock 70kDa protein 1B                                                       | mRNA |
| chr7  | 44578998  | 44579045  | three_prime | TMED4    | transmembrane p24 trafficking protein 4                                           | mRNA |
| chr19 | 13141054  | 13141121  | three_prime | NACC1    | nucleus accumbens associated 1, BEN and BTB (POZ) domain containing               | mRNA |
| chr3  | 189895006 | 189895068 | three_prime | TP63     | tumor protein p63                                                                 | mRNA |
| chr13 | 42321747  | 42321822  | three_prime | AKAP11   | A kinase (PRKA) anchor protein 11                                                 | mRNA |
| chr2  | 219183045 | 219183120 | three_prime | RETREG2  | reticulophagy regulator family member 2                                           | mRNA |

Supplementary Table S4\_Specific Peaks bound to PURa in CLIP-seq\_PURa vs IgG

|       |           |           |             |          |                                                                             |      |
|-------|-----------|-----------|-------------|----------|-----------------------------------------------------------------------------|------|
| chr7  | 152121967 | 152122033 | three_prime | GALNT11  | polypeptide N-acetylgalactosaminyltransferase 11                            | mRNA |
| chr17 | 50751514  | 50751525  | three_prime | LUC7L3   | LUC7 like 3 pre-mRNA splicing factor                                        | mRNA |
| chr10 | 119168246 | 119168312 | three_prime | PRDX3    | peroxiredoxin 3                                                             | mRNA |
| chr1  | 30932178  | 30932254  | three_prime | PUM1     | pumilio RNA binding family member 1                                         | mRNA |
| chr16 | 23067892  | 23067957  | three_prime | USP31    | ubiquitin specific peptidase 31                                             | mRNA |
| chr1  | 150265889 | 150265942 | three_prime | APH1A    | aph-1 homolog A, gamma-secretase subunit                                    | mRNA |
| chr2  | 28800356  | 28800416  | three_prime | PPP1CB   | protein phosphatase 1 catalytic subunit beta                                | mRNA |
| chr3  | 23920020  | 23920096  | three_prime | RPL15    | ribosomal protein L15                                                       | mRNA |
| chr3  | 197782640 | 197782716 | three_prime | FYTTD1   | forty-two-three domain containing 1,                                        | mRNA |
| chr14 | 70325381  | 70325427  | three_prime | COX16    | cytochrome c oxidase assembly factor COX16                                  | mRNA |
| chr1  | 149943729 | 149943794 | three_prime | OTUD7B   | OTU deubiquitinase 7B                                                       | mRNA |
| chr6  | 89643415  | 89643490  | three_prime | MDN1     | midasin AAA ATPase 1                                                        | mRNA |
| chr6  | 116495759 | 116495800 | three_prime | TRAPPC3L | trafficking protein particle complex 3 like                                 | mRNA |
| chr20 | 33854167  | 33854216  | three_prime | CHMP4B   | charged multivesicular body protein 4B                                      | mRNA |
| chr10 | 72011415  | 72011492  | three_prime | CHST3    | carbohydrate (chondroitin 6) sulfotransferase 3                             | mRNA |
| chr20 | 44907568  | 44907645  | three_prime | YWHAB    | tyrosine 3-monooxygenase/tryptophan 5-monooxygenase activation protein beta | mRNA |
| chr1  | 26854728  | 26854793  | three_prime | ZDHHC18  | zinc finger DHHC-type containing 18                                         | mRNA |
| chr16 | 13239078  | 13239126  | three_prime | SHISA9   | shisa family member 9                                                       | mRNA |
| chr4  | 69724204  | 69724248  | three_prime | SULT1B1  | sulfotransferase family 1B member 1                                         | mRNA |
| chr16 | 1349381   | 1349458   | three_prime | TSR3     | TSR3, 20S rRNA accumulation, homolog ( <i>S. cerevisiae</i> )               | mRNA |
| chr12 | 909981    | 910059    | three_prime | WNK1     | WNK lysine deficient protein kinase 1                                       | mRNA |
| chr15 | 73560284  | 73560343  | three_prime | NPTN     | neuroplastin                                                                | mRNA |
| chr6  | 121449220 | 121449242 | three_prime | GJA1     | gap junction protein, alpha 1, 43kDa                                        | mRNA |
| chr8  | 18056471  | 18056500  | three_prime | ASAH1    | N-acylsphingosine amidohydrolase 1                                          | mRNA |
| chr18 | 216361    | 216397    | three_prime | THOC1    | THO complex 1                                                               | mRNA |
| chr15 | 65577432  | 65577473  | three_prime | HACD3    | 3-hydroxyacyl-CoA dehydratase 3                                             | mRNA |
| chr5  | 6670993   | 6671071   | three_prime | SRD5A1   | steroid 5 alpha-reductase 1                                                 | mRNA |
| chr20 | 51597494  | 51597573  | three_prime | ATP9A    | ATPase phospholipid transporting 9A                                         | mRNA |
| chr1  | 171593292 | 171593371 | three_prime | PRRC2C   | proline rich coiled-coil 2C                                                 | mRNA |
| chr11 | 61802091  | 61802162  | three_prime | FADS1    | fatty acid desaturase 1                                                     | mRNA |
| chr3  | 122571919 | 122571972 | three_prime | DTX3L    | deltex E3 ubiquitin ligase 3L                                               | mRNA |
| chr18 | 26016762  | 26016831  | three_prime | SS18     | SS18 subunit of BAF chromatin remodeling complex                            | mRNA |
| chr14 | 75651177  | 75651218  | three_prime | ERG28    | ergosterol biosynthesis 28 homolog                                          | mRNA |
| chr11 | 102398815 | 102398891 | three_prime | TMEM123  | transmembrane protein 123                                                   | mRNA |
| chr18 | 724125    | 724203    | three_prime | YES1     | YES proto-oncogene 1                                                        | mRNA |
| chr14 | 103137285 | 103137337 | three_prime | TNFAIP2  | TNF alpha induced protein 2                                                 | mRNA |
| chr15 | 97971300  | 97971368  | three_prime | ARRDC4   | arrestin domain containing 4                                                | mRNA |
| chr1  | 169131611 | 169131679 | three_prime | ATP1B1   | ATPase Na+/K+ transporting subunit beta 1                                   | mRNA |
| chr20 | 44908209  | 44908286  | three_prime | YWHAB    | tyrosine 3-monooxygenase/tryptophan 5-monooxygenase activation protein beta | mRNA |
| chr7  | 106090638 | 106090675 | three_prime | SYPL1    | synaptophysin like 1                                                        | mRNA |
| chr9  | 94460683  | 94460716  | three_prime | MFSD14B  | major facilitator superfamily domain containing 14B                         | mRNA |
| chr3  | 194402828 | 194402896 | three_prime | ATP13A3  | ATPase 13A3                                                                 | mRNA |
| chr12 | 84860988  | 84861057  | three_prime | SLC6A15  | solute carrier family 6 member 15                                           | mRNA |
| chr1  | 211573575 | 211573636 | three_prime | SLC30A1  | solute carrier family 30 (zinc transporter), member 1                       | mRNA |
| chr4  | 98872828  | 98872910  | three_prime | EIF4E    | eukaryotic translation initiation factor 4E                                 | mRNA |
| chr19 | 42377408  | 42377490  | three_prime | MEGF8    | multiple EGF like domains 8                                                 | mRNA |
| chr5  | 138507332 | 138507413 | three_prime | ETF1     | eukaryotic translation termination factor 1                                 | mRNA |
| chr15 | 98959955  | 98960038  | three_prime | IGF1R    | insulin like growth factor 1 receptor                                       | mRNA |
| chr3  | 133589805 | 133589853 | three_prime | CDV3     | CDV3 homolog                                                                | mRNA |
| chr3  | 133589854 | 133589888 | three_prime | CDV3     | CDV3 homolog                                                                | mRNA |
| chr14 | 49894637  | 49894720  | three_prime | ARF6     | ADP-ribosylation factor 6                                                   | mRNA |
| chr1  | 162523336 | 162523380 | three_prime | UHMK1    | U2AF homology motif kinase 1                                                | mRNA |
| chr9  | 86027611  | 86027653  | three_prime | GOLM1    | golgi membrane protein 1                                                    | mRNA |
| chr3  | 10150804  | 10150845  | three_prime | VHL      | von Hippel-Lindau tumor suppressor, E3 ubiquitin protein ligase             | mRNA |
| chr16 | 67229427  | 67229500  | three_prime | FHOD1    | formin homology 2 domain containing 1                                       | mRNA |
| chr3  | 128070778 | 128070862 | three_prime | SEC61A1  | SEC61 translocon alpha 1 subunit                                            | mRNA |
| chr5  | 72911366  | 72911447  | three_prime | TNPO1    | transportin 1                                                               | mRNA |
| chr20 | 51599806  | 51599882  | three_prime | ATP9A    | ATPase phospholipid transporting 9A                                         | mRNA |
| chr16 | 57664938  | 57664983  | three_prime | ADGRG1   | adhesion G protein-coupled receptor G1                                      | mRNA |
| chr3  | 49533574  | 49533641  | three_prime | DAG1     | dystroglycan 1                                                              | mRNA |
| chr20 | 51599551  | 51599617  | three_prime | ATP9A    | ATPase phospholipid transporting 9A                                         | mRNA |

Supplementary Table S4\_Specific Peaks bound to PURa in CLIP-seq\_PURa vs IgG

|       |           |           |             |          |                                                                             |      |
|-------|-----------|-----------|-------------|----------|-----------------------------------------------------------------------------|------|
| chr5  | 95888068  | 95888151  | three_prime | ELL2     | elongation factor for RNA polymerase II 2                                   | mRNA |
| chr7  | 116559524 | 116559584 | three_prime | CAV1     | caveolin 1                                                                  | mRNA |
| chr12 | 6975857   | 6975938   | three_prime | EMG1     | EMG1 N1-specific pseudouridine methyltransferase                            | mRNA |
| chr3  | 98796216  | 98796256  | three_prime | DCBLD2   | discoidin                                                                   | mRNA |
| chr19 | 34227820  | 34227893  | three_prime | LSM14A   | LSM14A mRNA processing body assembly factor                                 | mRNA |
| chr4  | 105969765 | 105969828 | three_prime | NPNT     | nephronectin                                                                | mRNA |
| chr9  | 128694654 | 128694723 | three_prime | SET      | SET nuclear proto-oncogene                                                  | mRNA |
| chr10 | 96519760  | 96519839  | three_prime | TM9SF3   | transmembrane 9 superfamily member 3                                        | mRNA |
| chr6  | 79201513  | 79201599  | three_prime | HMGN3    | high mobility group nucleosomal binding domain 3                            | mRNA |
| chr22 | 19037615  | 19037655  | three_prime | DGCR2    | DiGeorge syndrome critical region gene 2                                    | mRNA |
| chr7  | 73832659  | 73832690  | three_prime | CLDN4    | claudin 4                                                                   | mRNA |
| chr14 | 49583589  | 49583675  | three_prime | RPS29    | ribosomal protein S29                                                       | mRNA |
| chr1  | 119914385 | 119914460 | three_prime | NOTCH2   | notch receptor 2                                                            | mRNA |
| chr3  | 58171753  | 58171840  | three_prime | FLNB     | filamin B                                                                   | mRNA |
| chr2  | 178505871 | 178505906 | three_prime | PLEKHA3  | pleckstrin homology domain containing A3                                    | mRNA |
| chr16 | 4383271   | 4383336   | three_prime | VASN     | vasorin                                                                     | mRNA |
| chr17 | 44206436  | 44206523  | three_prime | UBTF     | upstream binding transcription factor                                       | mRNA |
| chr11 | 111293731 | 111293818 | three_prime | COLCA1   | colorectal cancer associated 1                                              | mRNA |
| chr9  | 127940947 | 127941010 | three_prime | FAM102A  | family with sequence similarity 102 member A                                | mRNA |
| chr1  | 234606473 | 234606561 | three_prime | IRF2BP2  | interferon regulatory factor 2 binding protein 2                            | mRNA |
| chr6  | 47624749  | 47624798  | three_prime | CD2AP    | CD2-associated protein                                                      | mRNA |
| chr1  | 89181876  | 89181913  | three_prime | GBP4     | guanylate binding protein 4                                                 | mRNA |
| chr3  | 123491987 | 123492060 | three_prime | HACD2    | 3-hydroxyacyl-CoA dehydratase 2                                             | mRNA |
| chr2  | 173965297 | 173965331 | three_prime | SP3      | Sp3 transcription factor                                                    | mRNA |
| chr18 | 21867869  | 21867924  | three_prime | MIB1     | mindbomb E3 ubiquitin protein ligase 1                                      | mRNA |
| chr6  | 75253308  | 75253394  | three_prime | TMEM30A  | transmembrane protein 30A                                                   | mRNA |
| chr19 | 5206129   | 5206164   | three_prime | PTPRS    | protein tyrosine phosphatase receptor type S                                | mRNA |
| chr3  | 196051221 | 196051305 | three_prime | TFR3     | transferrin receptor                                                        | mRNA |
| chr5  | 80141115  | 80141191  | three_prime | SERINC5  | serine incorporator 5                                                       | mRNA |
| chr12 | 8941137   | 8941213   | three_prime | M6PR     | mannose-6-phosphate receptor                                                | mRNA |
| chr12 | 125030942 | 125031025 | three_prime | BRI3BP   | BRI3 binding protein                                                        | mRNA |
| chr9  | 136440858 | 136440946 | three_prime | SEC16A   | SEC16 homolog A, endoplasmic reticulum export factor                        | mRNA |
| chr17 | 56938428  | 56938473  | three_prime | COIL     | coilin                                                                      | mRNA |
| chr6  | 159680357 | 159680446 | three_prime | SOD2     | superoxide dismutase 2                                                      | mRNA |
| chr2  | 3515579   | 3515619   | three_prime | AD11     | acireductone dioxygenase 1                                                  | mRNA |
| chr6  | 34417458  | 34417547  | three_prime | RPS10    | ribosomal protein S10                                                       | mRNA |
| chr1  | 42926291  | 42926380  | three_prime | SLC2A1   | solute carrier family 2 member 1                                            | mRNA |
| chr11 | 33709235  | 33709325  | three_prime | CD59     | CD59 molecule                                                               | mRNA |
| chr18 | 30992356  | 30992431  | three_prime | DSC3     | desmocollin 3                                                               | mRNA |
| chr14 | 75133322  | 75133412  | three_prime | TMED10   | transmembrane p24 trafficking protein 10                                    | mRNA |
| chr17 | 39671905  | 39671976  | three_prime | PGAP3    | post-GPI attachment to proteins phospholipase 3                             | mRNA |
| chr9  | 112221333 | 112221408 | three_prime | PTBP3    | polypyrimidine tract binding protein 3                                      | mRNA |
| chr7  | 140453975 | 140454054 | three_prime | MKRN1    | makorin ring finger protein 1                                               | mRNA |
| chr8  | 56960180  | 56960257  | three_prime | IMPAD1   | inositol monophosphatase domain containing 1                                | mRNA |
| chr19 | 53874967  | 53875059  | three_prime | MYADM    | myeloid associated differentiation marker                                   | mRNA |
| chr6  | 109367810 | 109367898 | three_prime | CD164    | CD164 molecule                                                              | mRNA |
| chr20 | 37241527  | 37241619  | three_prime | RPN2     | ribophorin II                                                               | mRNA |
| chr4  | 127721473 | 127721545 | three_prime | INTU     | inturned planar cell polarity protein                                       | mRNA |
| chr9  | 6532735   | 6532801   | three_prime | GLDC     | glycine dehydrogenase (decarboxylating)                                     | mRNA |
| chr8  | 100919778 | 100919871 | three_prime | YWHAZ    | tyrosine 3-monooxygenase/tryptophan 5-monooxygenase activation protein zeta | mRNA |
| chr15 | 42210686  | 42210761  | three_prime | TMEM87A  | transmembrane protein 87A                                                   | mRNA |
| chr1  | 46677044  | 46677132  | three_prime | EFCAB14  | EF-hand calcium binding domain 14                                           | mRNA |
| chr3  | 152463715 | 152463809 | three_prime | MBNL1    | muscleblind like splicing regulator 1                                       | mRNA |
| chr8  | 142784896 | 142784990 | three_prime | LY6D     | lymphocyte antigen 6 complex, locus D                                       | mRNA |
| chr12 | 92143942  | 92143988  | three_prime | BTG1     | B-cell translocation gene 1, anti-proliferative                             | mRNA |
| chr16 | 19116681  | 19116776  | three_prime | ITPRIPL2 | inositol 1,4,5-trisphosphate receptor interacting protein-like 2            | mRNA |
| chr3  | 149173144 | 149173239 | three_prime | HPS3     | HPS3 biogenesis of lysosomal organelles complex 2 subunit 1                 | mRNA |
| chr1  | 154582305 | 154582357 | three_prime | ADAR     | adenosine deaminase RNA specific                                            | mRNA |
| chr12 | 46358290  | 46358385  | three_prime | SLC38A2  | solute carrier family 38 member 2                                           | mRNA |
| chr14 | 63684982  | 63685058  | three_prime | SGPP1    | sphingosine-1-phosphate phosphatase 1                                       | mRNA |
| chr1  | 154583289 | 154583356 | three_prime | ADAR     | adenosine deaminase RNA specific                                            | mRNA |



Supplementary Table S4\_Specific Peaks bound to PURa in CLIP-seq\_PURa vs IgG

|       |           |           |             |               |                                                                  |      |
|-------|-----------|-----------|-------------|---------------|------------------------------------------------------------------|------|
| chrX  | 154436247 | 154436342 | three_prime | ATP6AP1       | ATPase H <sup>+</sup> transporting accessory protein 1           | mRNA |
| chr16 | 15411436  | 15411524  | three_prime | MPV17L        | MPV17 mitochondrial membrane protein-like                        | mRNA |
| chr9  | 129738333 | 129738429 | three_prime | PTGES         | prostaglandin E synthase                                         | mRNA |
| chr14 | 21210586  | 21210680  | three_prime | HNRNPC        | heterogeneous nuclear ribonucleoprotein C                        | mRNA |
| chr16 | 19121087  | 19121174  | three_prime | ITPR1L2       | inositol 1,4,5-trisphosphate receptor interacting protein-like 2 | mRNA |
| chr17 | 50090385  | 50090479  | three_prime | ITGA3         | integrin subunit alpha 3                                         | mRNA |
| chr14 | 77508393  | 77508478  | three_prime | SPTLC2        | serine palmitoyltransferase long chain base subunit 2            | mRNA |
| chr19 | 48382957  | 48383050  | three_prime | KDELRL1       | KDEL endoplasmic reticulum protein retention receptor 1          | mRNA |
| chr3  | 42646832  | 42646928  | three_prime | NKTR          | natural killer cell triggering receptor                          | mRNA |
| chr1  | 92392077  | 92392153  | three_prime | RPAP2         | RNA polymerase II associated protein 2                           | mRNA |
| chr12 | 12917244  | 12917341  | three_prime | GPRC5A        | G protein-coupled receptor, class C, group 5, member A           | mRNA |
| chr1  | 202015800 | 202015845 | three_prime | ELF3          | E74 like ETS transcription factor 3                              | mRNA |
| chr16 | 10530199  | 10530293  | three_prime | EMP2          | epithelial membrane protein 2                                    | mRNA |
| chr5  | 83054654  | 83054690  | three_prime | TMEM167A      | transmembrane protein 167A                                       | mRNA |
| chr1  | 24673052  | 24673097  | three_prime | SRRM1         | serine and arginine repetitive matrix 1,                         | mRNA |
| chr4  | 168927458 | 168927508 | three_prime | PALLD         | palladin                                                         | mRNA |
| chr11 | 65854946  | 65855040  | three_prime | CFL1          | cofilin 1                                                        | mRNA |
| chr19 | 53876312  | 53876406  | three_prime | MYADM         | myeloid associated differentiation marker                        | mRNA |
| chr11 | 95131275  | 95131372  | three_prime | ENDOD1        | endonuclease domain containing 1                                 | mRNA |
| chr19 | 18279779  | 18279850  | three_prime | JUND          | jun D proto-oncogene                                             | mRNA |
| chr2  | 170993414 | 170993442 | three_prime | TLK1          | tousled like kinase 1                                            | mRNA |
| chr2  | 38068867  | 38068966  | three_prime | CYP1B1        | cytochrome P450 family 1 subfamily B member 1                    | mRNA |
| chr5  | 10435408  | 10435473  | three_prime | MARCHF6       | membrane associated ring-CH-type finger 6                        | mRNA |
| chr18 | 63598498  | 63598551  | three_prime | SERPINB13     | serpin family B member 13                                        | mRNA |
| chr3  | 33144209  | 33144308  | three_prime | CRTAP         | cartilage associated protein                                     | mRNA |
| chr5  | 97034494  | 97034584  | three_prime | LNPEP         | leucyl and cystinyl aminopeptidase                               | mRNA |
| chr12 | 6238060   | 6238087   | three_prime | CD9           | CD9 molecule                                                     | mRNA |
| chr11 | 118751384 | 118751438 | three_prime | DDX6          | DEAD-box helicase 6                                              | mRNA |
| chr1  | 225496319 | 225496418 | three_prime | ENAH          | ENAH actin regulator                                             | mRNA |
| chr4  | 138164912 | 138165011 | three_prime | SLC7A11       | solute carrier family 7 member 11                                | mRNA |
| chr22 | 19036392  | 19036417  | three_prime | DGCR2         | DiGeorge syndrome critical region gene 2                         | mRNA |
| chr20 | 32850065  | 32850140  | three_prime | MAPRE1        | microtubule-associated protein, RP/EB family, member 1           | mRNA |
| chr21 | 17569286  | 17569357  | three_prime | CXADR         | CXADR Ig-like cell adhesion molecule                             | mRNA |
| chr9  | 113261343 | 113261413 | three_prime | SLC31A1       | solute carrier family 31 (copper transporter), member 1          | mRNA |
| chr11 | 125620892 | 125620988 | three_prime | STT3A         | STT3 oligosaccharyltransferase complex catalytic subunit A       | mRNA |
| chr10 | 87754296  | 87754390  | three_prime | ATAD1         | ATPase family AAA domain containing 1                            | mRNA |
| chr11 | 47468271  | 47468333  | three_prime | CELF1         | CUGBP Elav-like family member 1                                  | mRNA |
| chr1  | 26854797  | 26854897  | three_prime | ZDHHC18       | zinc finger DHHC-type containing 18                              | mRNA |
| chr1  | 9729917   | 9730018   | three_prime | CLSTN1        | calsyntenin 1                                                    | mRNA |
| chr5  | 95795777  | 95795874  | three_prime | RHOBTB3       | Rho related BTB domain containing 3                              | mRNA |
| chr12 | 95658318  | 95658419  | three_prime | NTN4          | netrin 4                                                         | mRNA |
| chr3  | 182942706 | 182942775 | three_prime | DCUN1D1       | defective in cullin neddylation 1 domain containing 1            | mRNA |
| chr12 | 53479446  | 53479547  | three_prime | PCBP2         | poly(rC) binding protein 2                                       | mRNA |
| chr9  | 112218970 | 112219069 | three_prime | PTBP3         | polypyrimidine tract binding protein 3                           | mRNA |
| chr15 | 73560811  | 73560913  | three_prime | NPTN          | neuroplastin                                                     | mRNA |
| chr5  | 159157601 | 159157648 | three_prime | RNF145        | ring finger protein 145                                          | mRNA |
| chr2  | 175073457 | 175073559 | three_prime | SF3B1         | splicing factor 3b subunit 1                                     | mRNA |
| chrX  | 54444959  | 54445002  | three_prime | TSR2          | TSR2, 20S rRNA accumulation, homolog (S. cerevisiae)             | mRNA |
| chr18 | 672976    | 673078    | three_prime | TYMS          | thymidylate synthetase                                           | mRNA |
| chr12 | 112508317 | 112508409 | three_prime | PTPN11        | protein tyrosine phosphatase non-receptor type 11                | mRNA |
| chr2  | 241352098 | 241352127 | three_prime | SEPTIN2       | septin 2                                                         | mRNA |
| chr12 | 26973746  | 26973844  | three_prime | TM7SF3        | transmembrane 7 superfamily member 3                             | mRNA |
| chr15 | 98962557  | 98962568  | three_prime | IGF1R         | insulin like growth factor 1 receptor                            | mRNA |
| chr14 | 70370791  | 70370876  | three_prime | SYNJ2BP-COX16 | SYNJ2BP-COX16 readthrough                                        | mRNA |
| chr21 | 31668576  | 31668638  | three_prime | SOD1          | superoxide dismutase 1                                           | mRNA |
| chr19 | 10513307  | 10513360  | three_prime | S1PR5         | sphingosine-1-phosphate receptor 5                               | mRNA |
| chr11 | 70435266  | 70435365  | three_prime | CTTN          | cortactin                                                        | mRNA |
| chr3  | 194402947 | 194403050 | three_prime | ATP13A3       | ATPase 13A3                                                      | mRNA |
| chr1  | 209786515 | 209786619 | three_prime | IRF6          | interferon regulatory factor 6                                   | mRNA |
| chr1  | 20743271  | 20743353  | three_prime | HP1BP3        | heterochromatin protein 1 binding protein 3                      | mRNA |
| chr2  | 54972193  | 54972284  | three_prime | RTN4          | reticulon 4                                                      | mRNA |

Supplementary Table S4\_Specific Peaks bound to PURa in CLIP-seq\_PURa vs IgG

|       |           |           |             |          |                                                                              |      |
|-------|-----------|-----------|-------------|----------|------------------------------------------------------------------------------|------|
| chr19 | 48615343  | 48615430  | three_prime | RPL18    | ribosomal protein L18                                                        | mRNA |
| chr1  | 22091815  | 22091913  | three_prime | CDC42    | Cell Division Cycle 42                                                       | mRNA |
| chr6  | 106970836 | 106970914 | three_prime | CD24     | CD24 molecule                                                                | mRNA |
| chr6  | 106970924 | 106970939 | three_prime | CD24     | CD24 molecule                                                                | mRNA |
| chr14 | 69462001  | 69462106  | three_prime | SLC39A9  | solute carrier family 39 member 9                                            | mRNA |
| chr1  | 43622376  | 43622434  | three_prime | PTPRF    | protein tyrosine phosphatase receptor type F                                 | mRNA |
| chr10 | 74119630  | 74119708  | three_prime | VCL      | vinculin                                                                     | mRNA |
| chrX  | 103358303 | 103358366 | three_prime | TCEAL9   | transcription elongation factor A like 9                                     | mRNA |
| chr19 | 45609519  | 45609569  | three_prime | EML2     | EMAP like 2                                                                  | mRNA |
| chr1  | 171593138 | 171593201 | three_prime | PRRC2C   | proline rich coiled-coil 2C                                                  | mRNA |
| chr19 | 42377300  | 42377353  | three_prime | MEGF8    | multiple EGF like domains 8                                                  | mRNA |
| chr2  | 212999914 | 212999997 | three_prime | IKZF2    | IKAROS family zinc finger 2                                                  | mRNA |
| chr2  | 182781772 | 182781845 | three_prime | DNAJC10  | DnaJ heat shock protein family (Hsp40) member C10                            | mRNA |
| chr3  | 195568836 | 195568941 | three_prime | APOD     | apolipoprotein D                                                             | mRNA |
| chr20 | 44908022  | 44908124  | three_prime | YWHAB    | tyrosine 3-monooxygenase/tryptophan 5-monooxygenase activation protein beta  | mRNA |
| chr10 | 103595294 | 103595395 | three_prime | SH3PXD2A | SH3 and PX domains 2A                                                        | mRNA |
| chr1  | 144440487 | 144440563 | three_prime | NBPF15   | NBPF member 15                                                               | mRNA |
| chr14 | 74904234  | 74904268  | three_prime | RPS6KL1  | ribosomal protein S6 kinase like 1                                           | mRNA |
| chr20 | 47655646  | 47655753  | three_prime | NCOA3    | nuclear receptor coactivator 3                                               | mRNA |
| chr6  | 137197855 | 137197934 | three_prime | IFNGR1   | interferon gamma receptor 1                                                  | mRNA |
| chr19 | 44663347  | 44663381  | three_prime | PVR      | PVR cell adhesion molecule                                                   | mRNA |
| chr5  | 168549666 | 168549775 | three_prime | PANK3    | pantothenate kinase 3                                                        | mRNA |
| chr3  | 49534524  | 49534622  | three_prime | DAG1     | dystroglycan 1                                                               | mRNA |
| chr3  | 49534623  | 49534631  | three_prime | DAG1     | dystroglycan 1                                                               | mRNA |
| chr11 | 102398003 | 102398111 | three_prime | TMEM123  | transmembrane protein 123                                                    | mRNA |
| chr4  | 183639944 | 183640023 | three_prime | RWDD4    | RWD domain containing 4                                                      | mRNA |
| chr16 | 19118499  | 19118543  | three_prime | ITPR1L2  | inositol 1,4,5-trisphosphate receptor interacting protein-like 2             | mRNA |
| chr3  | 128620028 | 128620101 | three_prime | RPN1     | ribophorin I                                                                 | mRNA |
| chr5  | 151268044 | 151268154 | three_prime | GM2A     | GM2 ganglioside activator                                                    | mRNA |
| chr11 | 95130993  | 95131097  | three_prime | ENDOD1   | endonuclease domain containing 1                                             | mRNA |
| chr1  | 234606162 | 234606231 | three_prime | IRF2BP2  | interferon regulatory factor 2 binding protein 2                             | mRNA |
| chrX  | 20152066  | 20152177  | three_prime | RPS6KA3  | ribosomal protein S6 kinase A3                                               | mRNA |
| chr19 | 15160331  | 15160442  | three_prime | NOTCH3   | notch receptor 3                                                             | mRNA |
| chr1  | 116987216 | 116987315 | three_prime | PTGFRN   | prostaglandin F2 receptor inhibitor                                          | mRNA |
| chr3  | 64002437  | 64002549  | three_prime | ATXN7    | ataxin 7                                                                     | mRNA |
| chr16 | 15413126  | 15413227  | three_prime | MPV17L   | MPV17 mitochondrial membrane protein-like                                    | mRNA |
| chr2  | 214932104 | 214932195 | three_prime | ABCA12   | ATP binding cassette subfamily A member 12                                   | mRNA |
| chr1  | 233384645 | 233384756 | three_prime | MAP3K21  | mitogen-activated protein kinase kinase kinase 21                            | mRNA |
| chr14 | 69771536  | 69771644  | three_prime | SRSF5    | serine and arginine rich splicing factor 5                                   | mRNA |
| chr11 | 57552125  | 57552233  | three_prime | UBE2L6   | ubiquitin conjugating enzyme E2 L6                                           | mRNA |
| chr14 | 24308094  | 24308182  | three_prime | NOP9     | NOP9 nucleolar protein                                                       | mRNA |
| chr22 | 36226701  | 36226744  | three_prime | APOL2    | apolipoprotein L2                                                            | mRNA |
| chr16 | 70249596  | 70249673  | three_prime | EXOSC6   | exosome component 6                                                          | mRNA |
| chr4  | 55425484  | 55425595  | three_prime | TMEM165  | transmembrane protein 165                                                    | mRNA |
| chr3  | 105575926 | 105576040 | three_prime | ALCAM    | activated leukocyte cell adhesion molecule                                   | mRNA |
| chr20 | 64275257  | 64275343  | three_prime | PCMTD2   | protein-L-isoaspartate (D-aspartate) O-methyltransferase domain containing 2 | mRNA |
| chr11 | 88293905  | 88293990  | three_prime | CTSC     | cathepsin C                                                                  | mRNA |
| chr10 | 100549793 | 100549881 | three_prime | HIF1AN   | hypoxia inducible factor 1 subunit alpha inhibitor                           | mRNA |
| chr2  | 96185069  | 96185126  | three_prime | STAR7    | StAR related lipid transfer domain containing 7                              | mRNA |
| chr5  | 151806330 | 151806420 | three_prime | G3BP1    | G3BP stress granule assembly factor 1                                        | mRNA |
| chr8  | 56960045  | 56960160  | three_prime | IMPAD1   | inositol monophosphatase domain containing 1                                 | mRNA |
| chr7  | 135928959 | 135929034 | three_prime | MTPN     | myotrophin                                                                   | mRNA |
| chr3  | 105575799 | 105575890 | three_prime | ALCAM    | activated leukocyte cell adhesion molecule                                   | mRNA |
| chr16 | 84975548  | 84975648  | three_prime | ZDHHC7   | zinc finger DHHC-type containing 7                                           | mRNA |
| chr8  | 37754977  | 37755093  | three_prime | ERLIN2   | ER lipid raft associated 2                                                   | mRNA |
| chrX  | 153700728 | 153700844 | three_prime | BCAP31   | B cell receptor associated protein 31                                        | mRNA |
| chr10 | 5457879   | 5457996   | three_prime | NET1     | neuroepithelial cell transforming 1                                          | mRNA |
| chr17 | 4959282   | 4959399   | three_prime | SPAG7    | sperm associated antigen 7                                                   | mRNA |
| chr2  | 9584359   | 9584440   | three_prime | YWHAQ    | tyrosine 3-monooxygenase/tryptophan 5-monooxygenase activation protein theta | mRNA |
| chr14 | 95190864  | 95190908  | three_prime | CLMN     | calmin                                                                       | mRNA |
| chr6  | 42101268  | 42101373  | three_prime | C6orf132 | chromosome 6 open reading frame 132                                          | mRNA |

Supplementary Table S4\_Specific Peaks bound to PURa in CLIP-seq\_PURa vs IgG

|       |           |           |             |         |                                                             |      |
|-------|-----------|-----------|-------------|---------|-------------------------------------------------------------|------|
| chr9  | 136007318 | 136007413 | three_prime | NACC2   | NACC family member 2                                        | mRNA |
| chr5  | 10264741  | 10264853  | three_prime | CCT5    | chaperonin containing TCPI subunit 5                        | mRNA |
| chr8  | 6757613   | 6757716   | three_prime | AGPAT5  | 1-acylglycerol-3-phosphate O-acyltransferase 5              | mRNA |
| chr3  | 13316252  | 13316358  | three_prime | NUP210  | nucleoporin 210                                             | mRNA |
| chr12 | 50475976  | 50476023  | three_prime | LARP4   | La ribonucleoprotein 4                                      | mRNA |
| chr7  | 140453252 | 140453292 | three_prime | MKRN1   | makorin ring finger protein 1                               | mRNA |
| chr7  | 140453335 | 140453370 | three_prime | MKRN1   | makorin ring finger protein 1                               | mRNA |
| chr11 | 62888644  | 62888762  | three_prime | SLC3A2  | solute carrier family 3 member 2                            | mRNA |
| chr1  | 1056001   | 1056113   | three_prime | AGR1    | agrin                                                       | mRNA |
| chr14 | 75134282  | 75134351  | three_prime | TMED10  | transmembrane p24 trafficking protein 10                    | mRNA |
| chr12 | 111809692 | 111809760 | three_prime | ALDH2   | aldehyde dehydrogenase 2 family member                      | mRNA |
| chr17 | 29256974  | 29257050  | three_prime | NUFIP2  | nuclear FMR1 interacting protein 2                          | mRNA |
| chr19 | 54193531  | 54193599  | three_prime | TSEN34  | tRNA splicing endonuclease subunit 34                       | mRNA |
| chr2  | 197503263 | 197503342 | three_prime | HSPE1   | heat shock protein family E                                 | mRNA |
| chrX  | 68533030  | 68533094  | three_prime | YIPF6   | Yip1 domain family member 6                                 | mRNA |
| chr20 | 45816804  | 45816852  | three_prime | UBE2C   | ubiquitin conjugating enzyme E2 C                           | mRNA |
| chr9  | 113261807 | 113261894 | three_prime | SLC31A1 | solute carrier family 31 (copper transporter), member 1     | mRNA |
| chr15 | 65888516  | 65888587  | three_prime | RAB11A  | RAB11A, member RAS oncogene family                          | mRNA |
| chr1  | 116987617 | 116987665 | three_prime | PTGFRN  | prostaglandin F2 receptor inhibitor                         | mRNA |
| chr5  | 256542    | 256662    | three_prime | SDHA    | succinate dehydrogenase complex flavoprotein subunit A      | mRNA |
| chr12 | 48938717  | 48938787  | three_prime | ARF3    | ADP ribosylation factor 3                                   | mRNA |
| chr6  | 31829874  | 31829979  | three_prime | HSPA1B  | heat shock 70kDa protein 1B                                 | mRNA |
| chr6  | 79201635  | 79201726  | three_prime | HMG3    | high mobility group nucleosomal binding domain 3            | mRNA |
| chr3  | 141925657 | 141925778 | three_prime | ATP1B3  | ATPase Na+/K+ transporting subunit beta 3                   | mRNA |
| chr16 | 10529028  | 10529092  | three_prime | EMP2    | epithelial membrane protein 2                               | mRNA |
| chr7  | 23505078  | 23505163  | three_prime | TRA2A   | transformer 2 alpha homolog                                 | mRNA |
| chr16 | 68835369  | 68835470  | three_prime | CDH1    | cadherin 1                                                  | mRNA |
| chr14 | 63685849  | 63685954  | three_prime | SGPP1   | sphingosine-1-phosphate phosphatase 1                       | mRNA |
| chr12 | 1787976   | 1788099   | three_prime | ADIPOR2 | adiponectin receptor 2                                      | mRNA |
| chr1  | 235111003 | 235111078 | three_prime | TOMM20  | translocase of outer mitochondrial membrane 20              | mRNA |
| chr2  | 135783853 | 135783977 | three_prime | UBXN4   | UBX domain protein 4                                        | mRNA |
| chr3  | 149173560 | 149173678 | three_prime | HPS3    | HPS3 biogenesis of lysosomal organelles complex 2 subunit 1 | mRNA |
| chr3  | 160501844 | 160501963 | three_prime | KPNA4   | karyopherin subunit alpha 4                                 | mRNA |
| chr2  | 20201983  | 20202097  | three_prime | SDC1    | syndecan 1                                                  | mRNA |
| chr12 | 64695436  | 64695528  | three_prime | RASSF3  | Ras association domain family member 3                      | mRNA |
| chr1  | 156465525 | 156465650 | three_prime | MEF2D   | myocyte enhancer factor 2D                                  | mRNA |
| chr4  | 39780234  | 39780346  | three_prime | UBE2K   | ubiquitin conjugating enzyme E2 K                           | mRNA |
| chr6  | 2785265   | 2785390   | three_prime | WRNIP1  | WRN helicase interacting protein 1                          | mRNA |
| chr16 | 81380504  | 81380612  | three_prime | GAN     | gigaxonin                                                   | mRNA |
| chr14 | 75131804  | 75131930  | three_prime | TMED10  | transmembrane p24 trafficking protein 10                    | mRNA |
| chr20 | 45325971  | 45326097  | three_prime | SDC4    | syndecan 4                                                  | mRNA |
| chr1  | 169132215 | 169132330 | three_prime | ATP1B1  | ATPase Na+/K+ transporting subunit beta 1                   | mRNA |
| chr15 | 98964366  | 98964466  | three_prime | IGF1R   | insulin like growth factor 1 receptor                       | mRNA |
| chr12 | 909853    | 909979    | three_prime | WNK1    | WNK lysine deficient protein kinase 1                       | mRNA |
| chr15 | 40872540  | 40872666  | three_prime | RHOV    | ras homolog family member V                                 | mRNA |
| chr11 | 130877273 | 130877313 | three_prime | SNX19   | sorting nexin 19                                            | mRNA |
| chr16 | 16142142  | 16142253  | three_prime | ABCC1   | ATP binding cassette subfamily C member 1                   | mRNA |
| chr1  | 29326258  | 29326328  | three_prime | PTPRU   | protein tyrosine phosphatase receptor type U                | mRNA |
| chr19 | 11133617  | 11133743  | three_prime | LDLR    | low density lipoprotein receptor                            | mRNA |
| chr3  | 128070882 | 128071010 | three_prime | SEC61A1 | SEC61 translocon alpha 1 subunit                            | mRNA |
| chr11 | 57816697  | 57816773  | three_prime | CTNND1  | catenin delta 1                                             | mRNA |
| chr16 | 18791691  | 18791735  | three_prime | ARL6IP1 | ADP ribosylation factor like GTPase 6 interacting protein 1 | mRNA |
| chr16 | 18791749  | 18791815  | three_prime | ARL6IP1 | ADP ribosylation factor like GTPase 6 interacting protein 1 | mRNA |
| chr1  | 203852437 | 203852565 | three_prime | ZC3H11A | zinc finger CCCH-type containing 11A                        | mRNA |
| chr14 | 77506036  | 77506162  | three_prime | SPTLC2  | serine palmitoyltransferase long chain base subunit 2       | mRNA |
| chr6  | 158632372 | 158632489 | three_prime | TMEM181 | transmembrane protein 181                                   | mRNA |
| chr2  | 222943113 | 222943188 | three_prime | ACSL3   | acyl-CoA synthetase long chain family member 3              | mRNA |
| chr6  | 17615586  | 17615716  | three_prime | NUP153  | nucleoporin 153                                             | mRNA |
| chr14 | 103136919 | 103137049 | three_prime | TNFAIP2 | TNF alpha induced protein 2                                 | mRNA |
| chr1  | 156465700 | 156465776 | three_prime | MEF2D   | myocyte enhancer factor 2D                                  | mRNA |
| chr15 | 89197333  | 89197460  | three_prime | ABHD2   | abhydrolase domain containing 2                             | mRNA |

Supplementary Table S4\_Specific Peaks bound to PURa in CLIP-seq\_PURa vs IgG

|       |           |           |             |          |                                                                             |      |
|-------|-----------|-----------|-------------|----------|-----------------------------------------------------------------------------|------|
| chr3  | 196348478 | 196348595 | three_prime | UBXN7    | UBX domain protein 7                                                        | mRNA |
| chr3  | 195568706 | 195568828 | three_prime | APOD     | apolipoprotein D                                                            | mRNA |
| chr17 | 40194279  | 40194395  | three_prime | RAPGEFL1 | Rap guanine nucleotide exchange factor like 1                               | mRNA |
| chr19 | 15159633  | 15159740  | three_prime | NOTCH3   | notch receptor 3                                                            | mRNA |
| chr6  | 7289522   | 7289652   | three_prime | SSR1     | signal sequence receptor subunit 1                                          | mRNA |
| chr6  | 31268915  | 31269047  | three_prime | HLA-C    | major histocompatibility complex                                            | mRNA |
| chr22 | 36266918  | 36267041  | three_prime | APOL1    | apolipoprotein L1                                                           | mRNA |
| chr1  | 207795031 | 207795147 | three_prime | CD46     | CD46 molecule                                                               | mRNA |
| chr5  | 176375182 | 176375218 | three_prime | ARL10    | ADP-ribosylation factor-like 10                                             | mRNA |
| chr5  | 176375235 | 176375299 | three_prime | ARL10    | ADP-ribosylation factor-like 10                                             | mRNA |
| chr18 | 723426    | 723558    | three_prime | YES1     | YES proto-oncogene 1                                                        | mRNA |
| chr2  | 230820520 | 230820620 | three_prime | CAB39    | calcium binding protein 39                                                  | mRNA |
| chr10 | 96522117  | 96522251  | three_prime | TM9SF3   | transmembrane 9 superfamily member 3                                        | mRNA |
| chr6  | 47232710  | 47232789  | three_prime | TNFRSF21 | tumor necrosis factor receptor superfamily, member 21                       | mRNA |
| chr11 | 10307205  | 10307340  | three_prime | ADM      | adrenomedullin                                                              | mRNA |
| chr6  | 34588848  | 34588959  | three_prime | ILRUN    | inflammation and lipid regulator with UBA-like and NBR1-like domains        | mRNA |
| chr7  | 155309609 | 155309740 | three_prime | INSIG1   | insulin induced gene 1                                                      | mRNA |
| chr2  | 168770330 | 168770394 | three_prime | CERS6    | ceramide synthase 6                                                         | mRNA |
| chr3  | 107807884 | 107807937 | three_prime | BBX      | BBX high mobility group box domain containing                               | mRNA |
| chr14 | 54427774  | 54427841  | three_prime | CNIH1    | cornichon family AMPA receptor auxiliary protein 1                          | mRNA |
| chr6  | 47232051  | 47232158  | three_prime | TNFRSF21 | tumor necrosis factor receptor superfamily, member 21                       | mRNA |
| chr3  | 128813685 | 128813808 | three_prime | RAB7A    | RAB7A, member RAS oncogene family                                           | mRNA |
| chr15 | 77046212  | 77046243  | three_prime | TSPAN3   | tetraspanin 3                                                               | mRNA |
| chr15 | 77046283  | 77046348  | three_prime | TSPAN3   | tetraspanin 3                                                               | mRNA |
| chr19 | 47209809  | 47209918  | three_prime | SAE1     | SUMO1 activating enzyme subunit 1                                           | mRNA |
| chr3  | 48693787  | 48693823  | three_prime | IP6K2    | inositol hexakisphosphate kinase 2                                          | mRNA |
| chr1  | 152032537 | 152032673 | three_prime | S100A11  | S100 calcium binding protein A11                                            | mRNA |
| chr14 | 49895558  | 49895675  | three_prime | ARF6     | ADP-ribosylation factor 6                                                   | mRNA |
| chr16 | 68698884  | 68699012  | three_prime | CDH3     | cadherin 3                                                                  | mRNA |
| chr19 | 53874630  | 53874762  | three_prime | MYADM    | myeloid associated differentiation marker                                   | mRNA |
| chr6  | 34587732  | 34587773  | three_prime | ILRUN    | inflammation and lipid regulator with UBA-like and NBR1-like domains        | mRNA |
| chr6  | 34587776  | 34587845  | three_prime | ILRUN    | inflammation and lipid regulator with UBA-like and NBR1-like domains        | mRNA |
| chr2  | 37105709  | 37105763  | three_prime | EIF2AK2  | eukaryotic translation initiation factor 2 alpha kinase 2                   | mRNA |
| chr2  | 37105769  | 37105833  | three_prime | EIF2AK2  | eukaryotic translation initiation factor 2 alpha kinase 2                   | mRNA |
| chr11 | 111294744 | 111294793 | three_prime | COLCA1   | colorectal cancer associated 1                                              | mRNA |
| chr8  | 100920401 | 100920539 | three_prime | YWHAZ    | tyrosine 3-monooxygenase/tryptophan 5-monooxygenase activation protein zeta | mRNA |
| chr11 | 33708900  | 33709038  | three_prime | CD59     | CD59 molecule                                                               | mRNA |
| chr2  | 177538566 | 177538664 | three_prime | AGPS     | alkylglycerone phosphate synthase                                           | mRNA |
| chr10 | 73917074  | 73917158  | three_prime | PLAU     | plasminogen activator                                                       | mRNA |
| chr2  | 227559186 | 227559225 | three_prime | AGFG1    | ArfGAP with FG repeats 1                                                    | mRNA |
| chr1  | 235111208 | 235111348 | three_prime | TOMM20   | translocase of outer mitochondrial membrane 20                              | mRNA |
| chr9  | 105390049 | 105390189 | three_prime | SLC44A1  | solute carrier family 44 member 1                                           | mRNA |
| chr3  | 172820990 | 172821050 | three_prime | ECT2     | epithelial cell transforming 2                                              | mRNA |
| chr3  | 49533460  | 49533573  | three_prime | DAG1     | dystroglycan 1                                                              | mRNA |
| chr1  | 53246343  | 53246478  | three_prime | LRP8     | LDL receptor related protein 8                                              | mRNA |
| chr19 | 50310219  | 50310360  | three_prime | MYH14    | myosin heavy chain 14                                                       | mRNA |
| chr9  | 69715234  | 69715374  | three_prime | PTAR1    | protein prenyltransferase alpha subunit repeat containing 1                 | mRNA |
| chr1  | 162523153 | 162523239 | three_prime | UHMK1    | U2AF homology motif kinase 1                                                | mRNA |
| chr18 | 723272    | 723413    | three_prime | YES1     | YES proto-oncogene 1                                                        | mRNA |
| chr6  | 7287549   | 7287691   | three_prime | SSR1     | signal sequence receptor subunit 1                                          | mRNA |
| chr1  | 183144964 | 183145107 | three_prime | LAMC1    | laminin, gamma 1 (formerly LAMB2)                                           | mRNA |
| chr12 | 120699143 | 120699270 | three_prime | MLEC     | malectin                                                                    | mRNA |
| chr9  | 133362844 | 133362987 | three_prime | SURF4    | surfeit 4                                                                   | mRNA |
| chr17 | 37086315  | 37086420  | three_prime | ACACA    | acetyl-CoA carboxylase alpha                                                | mRNA |
| chr3  | 47852093  | 47852236  | three_prime | MAP4     | microtubule associated protein 4                                            | mRNA |
| chr17 | 759832    | 759926    | three_prime | GLOD4    | glyoxalase domain containing 4                                              | mRNA |
| chr17 | 35266116  | 35266162  | three_prime | SLFN5    | schlafen family member 5                                                    | mRNA |
| chr3  | 49359959  | 49360096  | three_prime | RHOA     | ras homolog family member A                                                 | mRNA |
| chr9  | 34087834  | 34087939  | three_prime | DCAF12   | DDB1 and CUL4 associated factor 12                                          | mRNA |
| chr22 | 45600839  | 45600983  | three_prime | FBLN1    | fibulin 1                                                                   | mRNA |
| chr19 | 53874496  | 53874627  | three_prime | MYADM    | myeloid associated differentiation marker                                   | mRNA |

Supplementary Table S4\_Specific Peaks bound to PURa in CLIP-seq\_PURa vs IgG

|       |           |           |             |          |                                                                                      |      |
|-------|-----------|-----------|-------------|----------|--------------------------------------------------------------------------------------|------|
| chr3  | 14486915  | 14486976  | three_prime | SLC6A6   | solute carrier family 6 member 6                                                     | mRNA |
| chr19 | 35658593  | 35658673  | three_prime | COX6B1   | cytochrome c oxidase subunit 6B1                                                     | mRNA |
| chr6  | 75255641  | 75255788  | three_prime | TMEM30A  | transmembrane protein 30A                                                            | mRNA |
| chr11 | 121633103 | 121633249 | three_prime | SORL1    | sortilin related receptor 1                                                          | mRNA |
| chr1  | 207793646 | 207793793 | three_prime | CD46     | CD46 molecule                                                                        | mRNA |
| chr3  | 177025061 | 177025138 | three_prime | TBL1XR1  | transducin beta like 1 X-linked receptor 1                                           | mRNA |
| chr3  | 177025164 | 177025205 | three_prime | TBL1XR1  | transducin beta like 1 X-linked receptor 1                                           | mRNA |
| chr17 | 47682459  | 47682550  | three_prime | KPNB1    | karyopherin subunit beta 1                                                           | mRNA |
| chr16 | 18792568  | 18792621  | three_prime | ARL6IP1  | ADP ribosylation factor like GTPase 6 interacting protein 1                          | mRNA |
| chr14 | 102050627 | 102050775 | three_prime | DYNC1H1  | dynein cytoplasmic 1 heavy chain 1                                                   | mRNA |
| chr9  | 5785630   | 5785767   | three_prime | ERMP1    | endoplasmic reticulum metalloproteinase 1                                            | mRNA |
| chr19 | 48923153  | 48923268  | three_prime | NUCB1    | nucleobindin 1                                                                       | mRNA |
| chr2  | 9488618   | 9488708   | three_prime | IAH1     | isoamyl acetate hydrolyzing esterase 1 (putative)                                    | mRNA |
| chr1  | 162529161 | 162529232 | three_prime | UHMK1    | U2AF homology motif kinase 1                                                         | mRNA |
| chr20 | 3805532   | 3805616   | three_prime | CDC25B   | cell division cycle 25B                                                              | mRNA |
| chr10 | 5458030   | 5458166   | three_prime | NET1     | neuroepithelial cell transforming 1                                                  | mRNA |
| chr17 | 5024230   | 5024354   | three_prime | KIF1C    | kinesin family member 1C                                                             | mRNA |
| chr17 | 47682892  | 47683041  | three_prime | KPNB1    | karyopherin subunit beta 1                                                           | mRNA |
| chr6  | 109367577 | 109367726 | three_prime | CD164    | CD164 molecule                                                                       | mRNA |
| chr8  | 142682527 | 142682615 | three_prime | PSCA     | prostate stem cell antigen                                                           | mRNA |
| chr8  | 43122941  | 43122982  | three_prime | POMK     | protein O-mannose kinase                                                             | mRNA |
| chr4  | 56933986  | 56934025  | three_prime | REST     | RE1 silencing transcription factor                                                   | mRNA |
| chr9  | 92032289  | 92032412  | three_prime | SPTLC1   | serine palmitoyltransferase long chain base subunit 1                                | mRNA |
| chr9  | 130139331 | 130139450 | three_prime | GPR107   | G protein-coupled receptor 107                                                       | mRNA |
| chr1  | 154582094 | 154582153 | three_prime | ADAR     | adenosine deaminase RNA specific                                                     | mRNA |
| chr17 | 50751354  | 50751504  | three_prime | LUC7L3   | LUC7 like 3 pre-mRNA splicing factor                                                 | mRNA |
| chr12 | 57095800  | 57095943  | three_prime | STAT6    | signal transducer and activator of transcription 6                                   | mRNA |
| chr7  | 88279212  | 88279316  | three_prime | STEAP4   | STEAP4 metalloproteinase                                                             | mRNA |
| chr12 | 53040477  | 53040628  | three_prime | EIF4B    | eukaryotic translation initiation factor 4B                                          | mRNA |
| chr5  | 138934330 | 138934482 | three_prime | CTNNA1   | catenin alpha 1                                                                      | mRNA |
| chr17 | 42314563  | 42314571  | three_prime | STAT3    | signal transducer and activator of transcription 3                                   | mRNA |
| chr10 | 70879428  | 70879539  | three_prime | SGPL1    | sphingosine-1-phosphate lyase 1                                                      | mRNA |
| chr4  | 99062667  | 99062783  | three_prime | METAP1   | methionyl aminopeptidase 1                                                           | mRNA |
| chr16 | 18792911  | 18793017  | three_prime | ARL6IP1  | ADP ribosylation factor like GTPase 6 interacting protein 1                          | mRNA |
| chr16 | 18793026  | 18793063  | three_prime | ARL6IP1  | ADP ribosylation factor like GTPase 6 interacting protein 1                          | mRNA |
| chr10 | 87753188  | 87753308  | three_prime | ATAD1    | ATPase family AAA domain containing 1                                                | mRNA |
| chr17 | 35266313  | 35266466  | three_prime | SLFN5    | schlafen family member 5                                                             | mRNA |
| chr4  | 105970119 | 105970173 | three_prime | NPNT     | nephronectin                                                                         | mRNA |
| chr4  | 105970186 | 105970235 | three_prime | NPNT     | nephronectin                                                                         | mRNA |
| chr9  | 121340174 | 121340235 | three_prime | STOM     | stomatin                                                                             | mRNA |
| chr3  | 197043326 | 197043381 | three_prime | DLG1     | discs large MAGUK scaffold protein 1                                                 | mRNA |
| chr5  | 151504125 | 151504233 | three_prime | FAT2     | FAT atypical cadherin 2                                                              | mRNA |
| chr1  | 1785995   | 1786044   | three_prime | GNB1     | G protein subunit beta 1                                                             | mRNA |
| chr9  | 33112008  | 33112100  | three_prime | B4GALT1  | beta-1,4-galactosyltransferase 1                                                     | mRNA |
| chr1  | 20652215  | 20652372  | three_prime | DDOST    | dolichyl-diphosphooligosaccharide--protein glycosyltransferase non-catalytic subunit | mRNA |
| chr1  | 31908756  | 31908913  | three_prime | PTP4A2   | protein tyrosine phosphatase 4A2                                                     | mRNA |
| chr1  | 92390038  | 92390126  | three_prime | RPAP2    | RNA polymerase II associated protein 2                                               | mRNA |
| chr2  | 47386571  | 47386728  | three_prime | EPCAM    | epithelial cell adhesion molecule                                                    | mRNA |
| chr11 | 62714889  | 62715003  | three_prime | HNRNPUL2 | heterogeneous nuclear ribonucleoprotein U like 2                                     | mRNA |
| chr12 | 130876191 | 130876259 | three_prime | RAN      | RAN, member RAS oncogene family                                                      | mRNA |
| chr6  | 115939044 | 115939120 | three_prime | FRK      | fyn-related Src family tyrosine kinase                                               | mRNA |
| chr5  | 97032728  | 97032785  | three_prime | LNPEP    | leucyl and cystinyl aminopeptidase                                                   | mRNA |
| chr14 | 105470511 | 105470541 | three_prime | MTA1     | metastasis associated 1                                                              | mRNA |
| chr2  | 177222334 | 177222427 | three_prime | HNRNPA3  | heterogeneous nuclear ribonucleoprotein A3                                           | mRNA |
| chr6  | 122444756 | 122444916 | three_prime | SERINC1  | serine incorporator 1                                                                | mRNA |
| chr5  | 97036288  | 97036411  | three_prime | LNPEP    | leucyl and cystinyl aminopeptidase                                                   | mRNA |
| chr1  | 32043358  | 32043489  | three_prime | KHDRBS1  | KH RNA binding domain containing, signal transduction associated 1                   | mRNA |
| chr15 | 40857287  | 40857422  | three_prime | SPINT1   | serine peptidase inhibitor                                                           | mRNA |
| chr15 | 68207990  | 68208077  | three_prime | CLN6     | CLN6 transmembrane ER protein                                                        | mRNA |
| chr1  | 183145344 | 183145475 | three_prime | LAMC1    | laminin, gamma 1 (formerly LAMB2)                                                    | mRNA |
| chr6  | 99400161  | 99400240  | three_prime | PNISR    | PNN interacting serine and arginine rich protein                                     | mRNA |

Supplementary Table S4\_Specific Peaks bound to PURa in CLIP-seq\_PURa vs IgG

|       |           |           |             |               |                                                                    |      |
|-------|-----------|-----------|-------------|---------------|--------------------------------------------------------------------|------|
| chr19 | 42378159  | 42378240  | three_prime | MEGF8         | multiple EGF like domains 8                                        | mRNA |
| chr8  | 27598022  | 27598077  | three_prime | CLU           | clusterin                                                          | mRNA |
| chr6  | 160105775 | 160105852 | three_prime | IGF2R         | insulin like growth factor 2 receptor                              | mRNA |
| chr5  | 175959608 | 175959772 | three_prime | THOC3         | THO complex 3                                                      | mRNA |
| chr12 | 48936802  | 48936921  | three_prime | ARF3          | ADP ribosylation factor 3                                          | mRNA |
| chr8  | 97852048  | 97852201  | three_prime | LAPTM4B       | lysosomal protein transmembrane 4 beta                             | mRNA |
| chr9  | 123103881 | 123103926 | three_prime | RABGAP1       | RAB GTPase activating protein 1                                    | mRNA |
| chr6  | 42103077  | 42103240  | three_prime | C6orf132      | chromosome 6 open reading frame 132                                | mRNA |
| chr17 | 29261371  | 29261468  | three_prime | NUFIP2        | nuclear FMR1 interacting protein 2                                 | mRNA |
| chr3  | 49534264  | 49534430  | three_prime | DAG1          | dystroglycan 1                                                     | mRNA |
| chr9  | 121340812 | 121340976 | three_prime | STOM          | stomatin                                                           | mRNA |
| chr16 | 56362014  | 56362098  | three_prime | AMFR          | autocrine motility factor receptor                                 | mRNA |
| chr11 | 10307021  | 10307189  | three_prime | ADM           | adrenomedullin                                                     | mRNA |
| chr18 | 9400393   | 9400561   | three_prime | TWSG1         | twisted gastrulation BMP signaling modulator 1                     | mRNA |
| chr12 | 48937017  | 48937127  | three_prime | ARF3          | ADP ribosylation factor 3                                          | mRNA |
| chr1  | 183144273 | 183144443 | three_prime | LAMC1         | laminin, gamma 1 (formerly LAMB2)                                  | mRNA |
| chr10 | 114434303 | 114434377 | three_prime | ABLIM1        | actin binding LIM protein 1                                        | mRNA |
| chr1  | 167788236 | 167788302 | three_prime | MPZL1         | myelin protein zero like 1                                         | mRNA |
| chr1  | 167788311 | 167788377 | three_prime | MPZL1         | myelin protein zero like 1                                         | mRNA |
| chr2  | 20250342  | 20250390  | three_prime | PUM2          | pumilio RNA binding family member 2                                | mRNA |
| chr5  | 79325840  | 79325902  | three_prime | JMY           | junction mediating and regulatory protein, p53 cofactor            | mRNA |
| chr7  | 44834271  | 44834360  | three_prime | H2AZ2         | H2A.Z variant histone 2                                            | mRNA |
| chr2  | 128190780 | 128190951 | three_prime | UGGT1         | UDP-glucose glycoprotein glucosyltransferase 1                     | mRNA |
| chr1  | 207794861 | 207795029 | three_prime | CD46          | CD46 molecule                                                      | mRNA |
| chr12 | 6237762   | 6237920   | three_prime | CD9           | CD9 molecule                                                       | mRNA |
| chr12 | 1787780   | 1787953   | three_prime | ADIPOR2       | adiponectin receptor 2                                             | mRNA |
| chr2  | 86777291  | 86777440  | three_prime | RMND5A        | required for meiotic nuclear division 5 homolog A                  | mRNA |
| chr3  | 108047127 | 108047292 | three_prime | CD47          | CD47 molecule                                                      | mRNA |
| chr8  | 30678701  | 30678801  | three_prime | GSR           | glutathione-disulfide reductase                                    | mRNA |
| chr17 | 50751097  | 50751173  | three_prime | LUC7L3        | LUC7 like 3 pre-mRNA splicing factor                               | mRNA |
| chr3  | 108046054 | 108046099 | three_prime | CD47          | CD47 molecule                                                      | mRNA |
| chr3  | 49534191  | 49534262  | three_prime | DAG1          | dystroglycan 1                                                     | mRNA |
| chr5  | 140706172 | 140706311 | three_prime | ZMAT2         | zinc finger matrin-type 2                                          | mRNA |
| chr6  | 30493572  | 30493689  | three_prime | HLA-E         | major histocompatibility complex, class I, E                       | mRNA |
| chr1  | 6186293   | 6186470   | three_prime | RPL22         | ribosomal protein L22                                              | mRNA |
| chr2  | 218254115 | 218254155 | three_prime | ARPC2         | actin related protein 2/3 complex subunit 2                        | mRNA |
| chr15 | 77046057  | 77046206  | three_prime | TSPAN3        | tetraspanin 3                                                      | mRNA |
| chr5  | 151663420 | 151663572 | three_prime | SPARC         | secreted protein acidic and cysteine rich                          | mRNA |
| chr9  | 83969217  | 83969396  | three_prime | HNRNPK        | heterogeneous nuclear ribonucleoprotein K                          | mRNA |
| chr1  | 53246893  | 53247056  | three_prime | <b>LDLR8</b>  | LDL receptor related protein 8                                     | mRNA |
| chr8  | 22005431  | 22005611  | three_prime | XPO7          | exportin 7                                                         | mRNA |
| chr17 | 4733751   | 4733872   | three_prime | <b>CXRL16</b> | C-X-C motif chemokine ligand 16                                    | mRNA |
| chr12 | 49763501  | 49763681  | three_prime | TMBIM6        | transmembrane BAX inhibitor motif containing 7                     | mRNA |
| chr8  | 116846005 | 116846069 | three_prime | RAD21         | RAD21 cohesin complex component                                    | mRNA |
| chr8  | 116846078 | 116846144 | three_prime | RAD21         | RAD21 cohesin complex component                                    | mRNA |
| chr11 | 119664486 | 119664564 | three_prime | NECTIN1       | nectin cell adhesion molecule 1                                    | mRNA |
| chr3  | 31637420  | 31637462  | three_prime | STT3B         | STT3 oligosaccharyltransferase complex catalytic subunit B         | mRNA |
| chr11 | 130144427 | 130144584 | three_prime | APLP2         | amyloid beta precursor like protein 2                              | mRNA |
| chr1  | 205715444 | 205715611 | three_prime | NUCKS1        | nuclear casein kinase and cyclin-dependent kinase substrate 1      | mRNA |
| chr5  | 151662611 | 151662795 | three_prime | SPARC         | secreted protein acidic and cysteine rich                          | mRNA |
| chr1  | 169131742 | 169131879 | three_prime | ATP1B1        | ATPase Na <sup>+</sup> /K <sup>+</sup> transporting subunit beta 1 | mRNA |
| chr19 | 38730173  | 38730323  | three_prime | ACTN4         | actinin alpha 4                                                    | mRNA |
| chr5  | 179614538 | 179614723 | three_prime | HNRNPH1       | heterogeneous nuclear ribonucleoprotein H1                         | mRNA |
| chr2  | 65269345  | 65269395  | three_prime | ACTR2         | actin related protein 2                                            | mRNA |
| chr1  | 40073334  | 40073439  | three_prime | PPT1          | palmitoyl-protein thioesterase 1                                   | mRNA |
| chr1  | 1785392   | 1785454   | three_prime | GNB1          | G protein subunit beta 1                                           | mRNA |
| chr1  | 35715234  | 35715359  | three_prime | C1orf216      | chromosome 1 open reading frame 216                                | mRNA |
| chr16 | 87830558  | 87830574  | three_prime | SLC7A5        | solute carrier family 7 member 5                                   | mRNA |
| chr2  | 20202187  | 20202295  | three_prime | SDC1          | syndecan 1                                                         | mRNA |
| chr7  | 90414389  | 90414573  | three_prime | CLDN12        | claudin 12                                                         | mRNA |
| chr8  | 125021916 | 125022085 | three_prime | SQLE          | squalene epoxidase                                                 | mRNA |

Supplementary Table S4\_Specific Peaks bound to PURa in CLIP-seq\_PURa vs IgG

|       |           |           |             |          |                                                                                   |      |
|-------|-----------|-----------|-------------|----------|-----------------------------------------------------------------------------------|------|
| chr6  | 33203908  | 33204095  | three_prime | SLC39A7  | solute carrier family 39 member 7                                                 | mRNA |
| chr6  | 30626108  | 30626271  | three_prime | MRPS18B  | mitochondrial ribosomal protein S18B                                              | mRNA |
| chr8  | 97851933  | 97851967  | three_prime | LAPTM4B  | lysosomal protein transmembrane 4 beta                                            | mRNA |
| chr8  | 97851968  | 97852032  | three_prime | LAPTM4B  | lysosomal protein transmembrane 4 beta                                            | mRNA |
| chr2  | 138571924 | 138572109 | three_prime | SPOPL    | speckle type BTB/POZ protein like                                                 | mRNA |
| chr6  | 43181267  | 43181298  | three_prime | SRF      | serum response factor (c-fos serum response element-binding transcription factor) | mRNA |
| chr2  | 233772975 | 233773165 | three_prime | UGT1A8   | UDP glucuronosyltransferase 1 family, polypeptide A8                              | mRNA |
| chr3  | 194403688 | 194403866 | three_prime | ATP13A3  | ATPase 13A3                                                                       | mRNA |
| chr20 | 49634157  | 49634347  | three_prime | B4GALT5  | UDP-Gal:betaGlcNAc beta 1,4- galactosyltransferase, polypeptide 5                 | mRNA |
| chr17 | 48059835  | 48060026  | three_prime | NFE2L1   | nuclear factor, erythroid 2 like 1                                                | mRNA |
| chr6  | 82366370  | 82366478  | three_prime | TPBG     | trophoblast glycoprotein                                                          | mRNA |
| chr20 | 45326114  | 45326297  | three_prime | SDC4     | syndecan 4                                                                        | mRNA |
| chr18 | 31548623  | 31548716  | three_prime | DSG2     | desmoglein 2                                                                      | mRNA |
| chr17 | 57680437  | 57680528  | three_prime | MSI2     | musashi RNA binding protein 2                                                     | mRNA |
| chr10 | 96521193  | 96521321  | three_prime | TM9SF3   | transmembrane 9 superfamily member 3                                              | mRNA |
| chr11 | 102398424 | 102398619 | three_prime | TMEM123  | transmembrane protein 123                                                         | mRNA |
| chr13 | 29512318  | 29512460  | three_prime | SLC7A1   | solute carrier family 7 member 1                                                  | mRNA |
| chr1  | 119913625 | 119913722 | three_prime | NOTCH2   | notch receptor 2                                                                  | mRNA |
| chr9  | 111933600 | 111933648 | three_prime | UGCG     | UDP-glucose ceramide glucosyltransferase                                          | mRNA |
| chr16 | 18793070  | 18793124  | three_prime | ARL6IP1  | ADP ribosylation factor like GTPase 6 interacting protein 1                       | mRNA |
| chr16 | 18793126  | 18793248  | three_prime | ARL6IP1  | ADP ribosylation factor like GTPase 6 interacting protein 1                       | mRNA |
| chr5  | 6671320   | 6671417   | three_prime | SRD5A1   | steroid 5 alpha-reductase 1                                                       | mRNA |
| chr2  | 26395387  | 26395482  | three_prime | SELENOI  | selenoprotein I                                                                   | mRNA |
| chr2  | 200823394 | 200823541 | three_prime | BZW1     | basic leucine zipper and W2 domains 1                                             | mRNA |
| chr4  | 105970432 | 105970560 | three_prime | NPNT     | nephronectin                                                                      | mRNA |
| chr4  | 105970562 | 105970631 | three_prime | NPNT     | nephronectin                                                                      | mRNA |
| chr20 | 32332651  | 32332754  | three_prime | KIF3B    | kinesin family member 3B                                                          | mRNA |
| chr19 | 54461820  | 54461992  | three_prime | LENG8    | leukocyte receptor cluster member 8                                               | mRNA |
| chr1  | 159918349 | 159918510 | three_prime | TAGLN2   | transgelin 2                                                                      | mRNA |
| chr2  | 208236513 | 208236704 | three_prime | IDH1     | isocitrate dehydrogenase (NADP(+)) 1                                              | mRNA |
| chr6  | 106971336 | 106971533 | three_prime | CD24     | CD24 molecule                                                                     | mRNA |
| chr17 | 1345298   | 1345499   | three_prime | YWHAE    | tyrosine 3-monooxygenase/tryptophan 5-monooxygenase activation protein epsilon    | mRNA |
| chr18 | 3458116   | 3458275   | three_prime | TGIF1    | TGFbeta induced factor homeobox 1                                                 | mRNA |
| chr22 | 36266405  | 36266606  | three_prime | APOL1    | apolipoprotein L1                                                                 | mRNA |
| chr12 | 88198204  | 88198258  | three_prime | TMTC3    | transmembrane O-mannosyltransferase targeting cadherins 3                         | mRNA |
| chr12 | 88198262  | 88198356  | three_prime | TMTC3    | transmembrane O-mannosyltransferase targeting cadherins 3                         | mRNA |
| chr2  | 85544933  | 85545018  | three_prime | MAT2A    | methionine adenosyltransferase 2A                                                 | mRNA |
| chr15 | 98959655  | 98959767  | three_prime | IGF1R    | insulin like growth factor 1 receptor                                             | mRNA |
| chr17 | 40457482  | 40457687  | three_prime | IGFBP4   | insulin-like growth factor binding protein 4                                      | mRNA |
| chr9  | 129739076 | 129739256 | three_prime | PTGES    | prostaglandin E synthase                                                          | mRNA |
| chr17 | 57006172  | 57006376  | three_prime | SCPEP1   | serine carboxypeptidase 1                                                         | mRNA |
| chr1  | 225497342 | 225497425 | three_prime | ENAH     | ENAH actin regulator                                                              | mRNA |
| chr6  | 34245810  | 34245957  | three_prime | HMGA1    | high mobility group AT-hook 1                                                     | mRNA |
| chr2  | 201380401 | 201380516 | three_prime | TRAK2    | trafficking kinesin protein 2                                                     | mRNA |
| chr9  | 93565865  | 93566073  | three_prime | FAM120A  | family with sequence similarity 120A                                              | mRNA |
| chr17 | 40457259  | 40457449  | three_prime | IGFBP4   | insulin-like growth factor binding protein 4                                      | mRNA |
| chr17 | 40457450  | 40457468  | three_prime | IGFBP4   | insulin-like growth factor binding protein 4                                      | mRNA |
| chr1  | 205715018 | 205715096 | three_prime | NUCKS1   | nuclear casein kinase and cyclin-dependent kinase substrate 1                     | mRNA |
| chr17 | 5024627   | 5024716   | three_prime | KIF1C    | kinesin family member 1C                                                          | mRNA |
| chr1  | 209786167 | 209786325 | three_prime | IRF6     | interferon regulatory factor 6                                                    | mRNA |
| chr11 | 64823848  | 64824016  | three_prime | CDC42BPG | CDC42 binding protein kinase gamma (DMPK-like)                                    | mRNA |
| chr5  | 10434263  | 10434357  | three_prime | MARCHF6  | membrane associated ring-CH-type finger 6                                         | mRNA |
| chr12 | 56597506  | 56597601  | three_prime | BAZ2A    | bromodomain adjacent to zinc finger domain 2A                                     | mRNA |
| chr12 | 56597603  | 56597718  | three_prime | BAZ2A    | bromodomain adjacent to zinc finger domain 2A                                     | mRNA |
| chr1  | 28147534  | 28147669  | three_prime | PTAFR    | platelet activating factor receptor                                               | mRNA |
| chr12 | 48938464  | 48938568  | three_prime | ARF3     | ADP ribosylation factor 3                                                         | mRNA |
| chr12 | 48938570  | 48938676  | three_prime | ARF3     | ADP ribosylation factor 3                                                         | mRNA |
| chr1  | 227919700 | 227919888 | three_prime | WNT9A    | wingless-type MMTV integration site family, member 9A                             | mRNA |
| chr1  | 116988839 | 116988900 | three_prime | PTGFRN   | prostaglandin F2 receptor inhibitor                                               | mRNA |
| chr15 | 60347338  | 60347492  | three_prime | ANXA2    | annexin A2                                                                        | mRNA |
| chr15 | 60347496  | 60347552  | three_prime | ANXA2    | annexin A2                                                                        | mRNA |

Supplementary Table S4\_Specific Peaks bound to PURa in CLIP-seq\_PURa vs IgG

|       |           |           |             |               |                                                             |      |
|-------|-----------|-----------|-------------|---------------|-------------------------------------------------------------|------|
| chr8  | 97852241  | 97852337  | three_prime | LAPTM4B       | lysosomal protein transmembrane 4 beta                      | mRNA |
| chr8  | 97852361  | 97852410  | three_prime | LAPTM4B       | lysosomal protein transmembrane 4 beta                      | mRNA |
| chr12 | 113390224 | 113390366 | three_prime | PLBD2         | phospholipase B domain containing 2                         | mRNA |
| chrX  | 147949571 | 147949618 | three_prime | FMR1          | FMRP translational regulator 1                              | mRNA |
| chr9  | 111933295 | 111933510 | three_prime | UGCG          | UDP-glucose ceramide glucosyltransferase                    | mRNA |
| chr9  | 5785890   | 5786106   | three_prime | ERMP1         | endoplasmic reticulum metalloproteinase 1                   | mRNA |
| chr12 | 53446279  | 53446357  | three_prime | PRR13         | proline rich 13                                             | mRNA |
| chr22 | 41907087  | 41907280  | three_prime | SREBF2        | sterol regulatory element binding transcription factor 2    | mRNA |
| chr1  | 207359712 | 207359930 | three_prime | CD55          | CD55 molecule                                               | mRNA |
| chr14 | 21210938  | 21211157  | three_prime | HNRNPC        | heterogeneous nuclear ribonucleoprotein C                   | mRNA |
| chr17 | 29262813  | 29262899  | three_prime | NUFIP2        | nuclear FMR1 interacting protein 2                          | mRNA |
| chr17 | 29262903  | 29262968  | three_prime | NUFIP2        | nuclear FMR1 interacting protein 2                          | mRNA |
| chr19 | 582774    | 582993    | three_prime | BSG           | basigin (Ok blood group)                                    | mRNA |
| chr16 | 71928745  | 71928803  | three_prime | IST1          | IST1 factor associated with ESCRT-III                       | mRNA |
| chr5  | 1462139   | 1462202   | three_prime | LPCAT1        | lysophosphatidylcholine acyltransferase 1                   | mRNA |
| chr17 | 38919803  | 38919943  | three_prime | LASP1         | LIM and SH3 protein 1                                       | mRNA |
| chr15 | 98961403  | 98961440  | three_prime | IGF1R         | insulin like growth factor 1 receptor                       | mRNA |
| chr14 | 69714553  | 69714661  | three_prime | SUSD6         | sushi domain containing 6                                   | mRNA |
| chrX  | 153696005 | 153696160 | three_prime | SLC6A8        | solute carrier family 6 member 8                            | mRNA |
| chr2  | 47160379  | 47160539  | three_prime | CALM2         | calmodulin 2                                                | mRNA |
| chr2  | 131051855 | 131051947 | three_prime | FAM168B       | family with sequence similarity 168 member B                | mRNA |
| chr14 | 64744153  | 64744206  | three_prime | PLEKHG3       | pleckstrin homology and RhoGEF domain containing G3         | mRNA |
| chr1  | 171592262 | 171592362 | three_prime | PRRC2C        | proline rich coiled-coil 2C                                 | mRNA |
| chr21 | 25880955  | 25881059  | three_prime | APP           | amyloid beta precursor protein                              | mRNA |
| chr21 | 25881060  | 25881160  | three_prime | APP           | amyloid beta precursor protein                              | mRNA |
| chr14 | 70371170  | 70371366  | three_prime | SYNJ2BP-COX16 | SYNJ2BP-COX16 readthrough                                   | mRNA |
| chr6  | 106970159 | 106970308 | three_prime | CD24          | CD24 molecule                                               | mRNA |
| chr21 | 25880867  | 25880908  | three_prime | APP           | amyloid beta precursor protein                              | mRNA |
| chr3  | 160501478 | 160501708 | three_prime | KPNA4         | karyopherin subunit alpha 4                                 | mRNA |
| chr17 | 59840463  | 59840561  | three_prime | VMP1          | vacuole membrane protein 1                                  | mRNA |
| chr19 | 48197350  | 48197481  | three_prime | ZSWIM9        | zinc finger SWIM-type containing 9                          | mRNA |
| chr16 | 66723203  | 66723370  | three_prime | DYNC1L2       | dynein cytoplasmic 1 light intermediate chain 2             | mRNA |
| chr11 | 110230506 | 110230688 | three_prime | RDX           | radixin, transcript variant 4                               | mRNA |
| chr1  | 209785855 | 209785909 | three_prime | IRF6          | interferon regulatory factor 6                              | mRNA |
| chr1  | 119913318 | 119913491 | three_prime | NOTCH2        | notch receptor 2                                            | mRNA |
| chrX  | 41348613  | 41348762  | three_prime | DDX3X         | DEAD-box helicase 3 X-linked                                | mRNA |
| chr12 | 53041270  | 53041420  | three_prime | EIF4B         | eukaryotic translation initiation factor 4B                 | mRNA |
| chr16 | 56362420  | 56362506  | three_prime | AMFR          | autocrine motility factor receptor                          | mRNA |
| chr16 | 18791926  | 18792143  | three_prime | ARL6IP1       | ADP ribosylation factor like GTPase 6 interacting protein 1 | mRNA |
| chr6  | 30899889  | 30900129  | three_prime | DDR1          | discoidin domain receptor tyrosine kinase 1                 | mRNA |
| chr11 | 58618503  | 58618636  | three_prime | ZFP91         | ZFP91 zinc finger protein                                   | mRNA |
| chr22 | 41663803  | 41664038  | three_prime | XRCC6         | X-ray repair cross complementing 6                          | mRNA |
| chr6  | 31817748  | 31817837  | three_prime | HSPA1A        | heat shock 70kDa protein 1A                                 | mRNA |
| chr10 | 100362423 | 100362627 | three_prime | SCD           | stearoyl-CoA desaturase (delta-9-desaturase)                | mRNA |
| chr6  | 107871577 | 107871717 | three_prime | SEC63         | SEC63 homolog, protein translocation regulator              | mRNA |
| chr17 | 35725561  | 35725665  | three_prime | AP2B1         | adaptor related protein complex 2 subunit beta 1            | mRNA |
| chr13 | 113264490 | 113264627 | three_prime | CUL4A         | cullin 4A                                                   | mRNA |
| chr5  | 141516341 | 141516565 | three_prime | DIAPH1        | diaphanous related formin 1                                 | mRNA |
| chr1  | 42178162  | 42178266  | three_prime | FOXJ3         | forkhead box J3                                             | mRNA |
| chr5  | 171410621 | 171410683 | three_prime | NPM1          | nucleophosmin 1                                             | mRNA |
| chr5  | 171410761 | 171410869 | three_prime | NPM1          | nucleophosmin 1                                             | mRNA |
| chr1  | 112913654 | 112913820 | three_prime | SLC16A1       | solute carrier family 16 member 1                           | mRNA |
| chr6  | 109368075 | 109368308 | three_prime | CD164         | CD164 molecule                                              | mRNA |
| chr10 | 71299955  | 71300183  | three_prime | UNC5B         | unc-5 netrin receptor B                                     | mRNA |
| chr5  | 159158106 | 159158176 | three_prime | RNF145        | ring finger protein 145                                     | mRNA |
| chr5  | 159158195 | 159158356 | three_prime | RNF145        | ring finger protein 145                                     | mRNA |
| chr14 | 61278932  | 61278997  | three_prime | TMEM30B       | transmembrane protein 30B                                   | mRNA |
| chr14 | 61279107  | 61279180  | three_prime | TMEM30B       | transmembrane protein 30B                                   | mRNA |
| chr7  | 106091017 | 106091220 | three_prime | SYPL1         | synaptophysin like 1                                        | mRNA |
| chr15 | 72199028  | 72199099  | three_prime | PKM           | pyruvate kinase M1/2                                        | mRNA |
| chr1  | 42177638  | 42177842  | three_prime | FOXJ3         | forkhead box J3                                             | mRNA |



Supplementary Table S4\_Specific Peaks bound to PURa in CLIP-seq\_PURa vs IgG

|       |           |           |             |          |                                                                                |      |
|-------|-----------|-----------|-------------|----------|--------------------------------------------------------------------------------|------|
| chr19 | 38292205  | 38292366  | three_prime | SPINT2   | serine peptidase inhibitor, Kunitz type 2                                      | mRNA |
| chr19 | 38292371  | 38292414  | three_prime | SPINT2   | serine peptidase inhibitor, Kunitz type 2                                      | mRNA |
| chr14 | 75134354  | 75134607  | three_prime | TMED10   | transmembrane p24 trafficking protein 10                                       | mRNA |
| chr3  | 196829487 | 196829741 | three_prime | PAK2     | p21 (RAC1) activated kinase 2                                                  | mRNA |
| chr1  | 10419689  | 10419847  | three_prime | PGD      | phosphogluconate dehydrogenase                                                 | mRNA |
| chr20 | 49634972  | 49635147  | three_prime | B4GALT5  | UDP-Gal:betaGlcNAc beta 1,4- galactosyltransferase, polypeptide 5              | mRNA |
| chr20 | 49635150  | 49635199  | three_prime | B4GALT5  | UDP-Gal:betaGlcNAc beta 1,4- galactosyltransferase, polypeptide 5              | mRNA |
| chr2  | 230818841 | 230818915 | three_prime | CAB39    | calcium binding protein 39                                                     | mRNA |
| chr2  | 230818921 | 230819098 | three_prime | CAB39    | calcium binding protein 39                                                     | mRNA |
| chr11 | 71434873  | 71435133  | three_prime | DHCR7    | 7-dehydrocholesterol reductase                                                 | mRNA |
| chr16 | 1701024   | 1701184   | three_prime | JPT2     | Jupiter microtubule associated homolog 2                                       | mRNA |
| chr1  | 207794623 | 207794753 | three_prime | CD46     | CD46 molecule                                                                  | mRNA |
| chr19 | 42377801  | 42377980  | three_prime | MEGF8    | multiple EGF like domains 8                                                    | mRNA |
| chr16 | 19119112  | 19119375  | three_prime | ITPR1PL2 | inositol 1,4,5-trisphosphate receptor interacting protein-like 2               | mRNA |
| chr3  | 152464729 | 152464862 | three_prime | MBNL1    | muscleblind like splicing regulator 1                                          | mRNA |
| chr19 | 1272581   | 1272754   | three_prime | CIRBP    | cold inducible RNA binding protein                                             | mRNA |
| chr1  | 203740129 | 203740222 | three_prime | ATP2B4   | ATPase plasma membrane Ca2+ transporting 4                                     | mRNA |
| chr1  | 203740227 | 203740328 | three_prime | ATP2B4   | ATPase plasma membrane Ca2+ transporting 4                                     | mRNA |
| chr1  | 167789312 | 167789404 | three_prime | MPZL1    | myelin protein zero like 1                                                     | mRNA |
| chr1  | 167789461 | 167789556 | three_prime | MPZL1    | myelin protein zero like 1                                                     | mRNA |
| chr2  | 10783908  | 10784118  | three_prime | PDIA6    | protein disulfide isomerase family A member 6                                  | mRNA |
| chr20 | 3805709   | 3805936   | three_prime | CDC25B   | cell division cycle 25B                                                        | mRNA |
| chr1  | 205714570 | 205714734 | three_prime | NUCKS1   | nuclear casein kinase and cyclin-dependent kinase substrate 1                  | mRNA |
| chr10 | 87754440  | 87754687  | three_prime | ATAD1    | ATPase family AAA domain containing 1                                          | mRNA |
| chr19 | 46774908  | 46775179  | three_prime | SLC1A5   | solute carrier family 1 member 5                                               | mRNA |
| chr12 | 12916963  | 12917236  | three_prime | GPRC5A   | G protein-coupled receptor, class C, group 5, member A                         | mRNA |
| chr1  | 1055393   | 1055646   | three_prime | AGR1     | agrin                                                                          | mRNA |
| chr10 | 71300346  | 71300474  | three_prime | UNC5B    | unc-5 netrin receptor B                                                        | mRNA |
| chr8  | 119244794 | 119245048 | three_prime | MAL2     | mal, T cell differentiation protein 2                                          | mRNA |
| chr11 | 69651751  | 69651925  | three_prime | CCND1    | cyclin D1                                                                      | mRNA |
| chr9  | 112221641 | 112221716 | three_prime | PTBP3    | polypyrimidine tract binding protein 3                                         | mRNA |
| chr9  | 112221719 | 112221869 | three_prime | PTBP3    | polypyrimidine tract binding protein 3                                         | mRNA |
| chr12 | 125029781 | 125029937 | three_prime | BRI3BP   | BRI3 binding protein                                                           | mRNA |
| chr11 | 1752754   | 1753035   | three_prime | CTSD     | cathepsin D                                                                    | mRNA |
| chr20 | 51600691  | 51600740  | three_prime | ATP9A    | ATPase phospholipid transporting 9A                                            | mRNA |
| chr20 | 51600755  | 51600879  | three_prime | ATP9A    | ATPase phospholipid transporting 9A                                            | mRNA |
| chr1  | 154584452 | 154584486 | three_prime | ADAR     | adenosine deaminase RNA specific                                               | mRNA |
| chr8  | 123014521 | 123014755 | three_prime | DERL1    | derlin 1                                                                       | mRNA |
| chr6  | 117707146 | 117707224 | three_prime | NUS1     | nuclear undecaprenyl pyrophosphate synthase 1 homolog (S. cerevisiae)          | mRNA |
| chr6  | 117707227 | 117707265 | three_prime | NUS1     | nuclear undecaprenyl pyrophosphate synthase 1 homolog (S. cerevisiae)          | mRNA |
| chr3  | 41239653  | 41239736  | three_prime | CTNNA1   | catenin beta 1                                                                 | mRNA |
| chr3  | 41239794  | 41239916  | three_prime | CTNNA1   | catenin beta 1                                                                 | mRNA |
| chr11 | 62624831  | 62624903  | three_prime | GANAB    | glucosidase II alpha subunit                                                   | mRNA |
| chr12 | 12914239  | 12914465  | three_prime | GPRC5A   | G protein-coupled receptor, class C, group 5, member A                         | mRNA |
| chr17 | 58089788  | 58089934  | three_prime | DYNLL2   | dynein, light chain, LC8-type 2                                                | mRNA |
| chr17 | 58089935  | 58089996  | three_prime | DYNLL2   | dynein, light chain, LC8-type 2                                                | mRNA |
| chr15 | 98963364  | 98963523  | three_prime | IGF1R    | insulin like growth factor 1 receptor                                          | mRNA |
| chr9  | 129739261 | 129739554 | three_prime | PTGES    | prostaglandin E synthase                                                       | mRNA |
| chr9  | 128695190 | 128695305 | three_prime | SET      | SET nuclear proto-oncogene                                                     | mRNA |
| chr11 | 1753177   | 1753449   | three_prime | CTSD     | cathepsin D                                                                    | mRNA |
| chr17 | 1344791   | 1345028   | three_prime | YWHAE    | tyrosine 3-monooxygenase/tryptophan 5-monooxygenase activation protein epsilon | mRNA |
| chr1  | 207360131 | 207360299 | three_prime | CD55     | CD55 molecule                                                                  | mRNA |
| chr15 | 64156047  | 64156145  | three_prime | PPIB     | peptidylprolyl isomerase B (cyclophilin B)                                     | mRNA |
| chr1  | 26864158  | 26864456  | three_prime | SFN      | stratifin                                                                      | mRNA |
| chr11 | 2396940   | 2397067   | three_prime | CD81     | CD81 molecule                                                                  | mRNA |
| chr14 | 103136378 | 103136501 | three_prime | TNFAIP2  | TNF alpha induced protein 2                                                    | mRNA |
| chr2  | 85320914  | 85321223  | three_prime | TGOLN2   | trans-golgi network protein 2                                                  | mRNA |
| chr17 | 38921477  | 38921744  | three_prime | LASP1    | LIM and SH3 protein 1                                                          | mRNA |
| chr6  | 36601961  | 36602272  | three_prime | SRSF3    | serine and arginine rich splicing factor 3                                     | mRNA |
| chr12 | 49764431  | 49764610  | three_prime | TMBIM6   | transmembrane BAX inhibitor motif containing 6                                 | mRNA |
| chr12 | 49764618  | 49764721  | three_prime | TMBIM6   | transmembrane BAX inhibitor motif containing 6                                 | mRNA |

Supplementary Table S4\_Specific Peaks bound to PURa in CLIP-seq\_PURa vs IgG

|       |           |           |             |          |                                                                             |      |
|-------|-----------|-----------|-------------|----------|-----------------------------------------------------------------------------|------|
| chrX  | 16844835  | 16845087  | three_prime | RBBP7    | RB binding protein 7, chromatin remodeling factor                           | mRNA |
| chr12 | 108645265 | 108645317 | three_prime | CORO1C   | coronin 1C                                                                  | mRNA |
| chr12 | 108645329 | 108645424 | three_prime | CORO1C   | coronin 1C                                                                  | mRNA |
| chr12 | 108645554 | 108645572 | three_prime | CORO1C   | coronin 1C                                                                  | mRNA |
| chr9  | 128694822 | 128695139 | three_prime | SET      | SET nuclear proto-oncogene                                                  | mRNA |
| chr3  | 49534632  | 49534730  | three_prime | DAG1     | dystroglycan 1                                                              | mRNA |
| chr19 | 35123440  | 35123619  | three_prime | FXYP3    | FXYP domain containing ion transport regulator 3                            | mRNA |
| chr14 | 75132584  | 75132655  | three_prime | TMED10   | transmembrane p24 trafficking protein 10                                    | mRNA |
| chr14 | 75132658  | 75132831  | three_prime | TMED10   | transmembrane p24 trafficking protein 10                                    | mRNA |
| chr1  | 154206946 | 154207114 | three_prime | C1orf43  | chromosome 1 open reading frame 43                                          | mRNA |
| chr10 | 72275138  | 72275466  | three_prime | DDIT4    | DNA-damage-inducible transcript 4                                           | mRNA |
| chr14 | 67677026  | 67677116  | three_prime | RDH11    | retinol dehydrogenase 11                                                    | mRNA |
| chr3  | 48467886  | 48467994  | three_prime | SHISA5   | shisa family member 5                                                       | mRNA |
| chr3  | 48468079  | 48468217  | three_prime | SHISA5   | shisa family member 5                                                       | mRNA |
| chr19 | 38291927  | 38292059  | three_prime | SPINT2   | serine peptidase inhibitor, Kunitz type 2                                   | mRNA |
| chr19 | 38292062  | 38292156  | three_prime | SPINT2   | serine peptidase inhibitor, Kunitz type 2                                   | mRNA |
| chr3  | 105574715 | 105574836 | three_prime | ALCAM    | activated leukocyte cell adhesion molecule                                  | mRNA |
| chr1  | 160997625 | 160997963 | three_prime | F11R     | F11 receptor                                                                | mRNA |
| chr8  | 100918956 | 100919246 | three_prime | YWHAZ    | tyrosine 3-monooxygenase/tryptophan 5-monooxygenase activation protein zeta | mRNA |
| chr15 | 78897048  | 78897220  | three_prime | MORF4L1  | mortality factor 4 like 1                                                   | mRNA |
| chr15 | 78897267  | 78897328  | three_prime | MORF4L1  | mortality factor 4 like 1                                                   | mRNA |
| chr6  | 122444259 | 122444570 | three_prime | SERINC1  | serine incorporator 1                                                       | mRNA |
| chr5  | 179728590 | 179728928 | three_prime | CANX     | calnexin                                                                    | mRNA |
| chr2  | 20032707  | 20032756  | three_prime | LAPTM4A  | lysosomal protein transmembrane 4 alpha                                     | mRNA |
| chr2  | 20032760  | 20033024  | three_prime | LAPTM4A  | lysosomal protein transmembrane 4 alpha                                     | mRNA |
| chr16 | 87830024  | 87830195  | three_prime | SLC7A5   | solute carrier family 7 member 5                                            | mRNA |
| chr16 | 87830218  | 87830374  | three_prime | SLC7A5   | solute carrier family 7 member 5                                            | mRNA |
| chr1  | 160996232 | 160996523 | three_prime | F11R     | F11 receptor                                                                | mRNA |
| chr1  | 116404440 | 116404749 | three_prime | ATP1A1   | ATPase Na <sup>+</sup> /K <sup>+</sup> transporting subunit alpha 1         | mRNA |
| chr3  | 194405089 | 194405214 | three_prime | ATP13A3  | ATPase 13A3                                                                 | mRNA |
| chr2  | 231454951 | 231455004 | three_prime | NCL      | nucleolin                                                                   | mRNA |
| chr7  | 129832390 | 129832634 | three_prime | UBE2H    | ubiquitin conjugating enzyme E2 H                                           | mRNA |
| chr16 | 2771149   | 2771306   | three_prime | SRRM2    | serine/arginine repetitive matrix 2                                         | mRNA |
| chr13 | 21147645  | 21147717  | three_prime | SAP18    | Sin3A associated protein 18                                                 | mRNA |
| chr13 | 21147722  | 21147789  | three_prime | SAP18    | Sin3A associated protein 18                                                 | mRNA |
| chr5  | 43290826  | 43291089  | three_prime | HMGCS1   | 3-hydroxy-3-methylglutaryl-CoA synthase 1                                   | mRNA |
| chr12 | 12916594  | 12916793  | three_prime | GPRC5A   | G protein-coupled receptor, class C, group 5, member A                      | mRNA |
| chr12 | 12916794  | 12916939  | three_prime | GPRC5A   | G protein-coupled receptor, class C, group 5, member A                      | mRNA |
| chr8  | 119245265 | 119245390 | three_prime | MAL2     | mal, T cell differentiation protein 2                                       | mRNA |
| chr8  | 119245393 | 119245652 | three_prime | MAL2     | mal, T cell differentiation protein 2                                       | mRNA |
| chr7  | 45912383  | 45912576  | three_prime | IGFBP3   | insulin like growth factor binding protein 3                                | mRNA |
| chr7  | 45912608  | 45912771  | three_prime | IGFBP3   | insulin like growth factor binding protein 3                                | mRNA |
| chr1  | 205715664 | 205715958 | three_prime | NUCKS1   | nuclear casein kinase and cyclin-dependent kinase substrate 1               | mRNA |
| chr6  | 44253488  | 44253843  | three_prime | HSP90AB1 | heat shock protein 90 alpha family class B member 1                         | mRNA |
| chr17 | 41513764  | 41514125  | three_prime | KRT15    | keratin 15                                                                  | mRNA |
| chr2  | 85544544  | 85544725  | three_prime | MAT2A    | methionine adenosyltransferase 2A                                           | mRNA |
| chr11 | 71434470  | 71434714  | three_prime | DHCR7    | 7-dehydrocholesterol reductase                                              | mRNA |
| chr11 | 71434817  | 71434872  | three_prime | DHCR7    | 7-dehydrocholesterol reductase                                              | mRNA |
| chr15 | 98958600  | 98958979  | three_prime | IGF1R    | insulin like growth factor 1 receptor                                       | mRNA |
| chr1  | 153981820 | 153981938 | three_prime | RAB13    | RAB13, member RAS oncogene family                                           | mRNA |
| chr1  | 153981939 | 153982078 | three_prime | RAB13    | RAB13, member RAS oncogene family                                           | mRNA |
| chr1  | 209787225 | 209787488 | three_prime | IRF6     | interferon regulatory factor 6                                              | mRNA |
| chr1  | 45511036  | 45511167  | three_prime | PRDX1    | peroxiredoxin 1                                                             | mRNA |
| chr1  | 45511173  | 45511414  | three_prime | PRDX1    | peroxiredoxin 1                                                             | mRNA |
| chr12 | 49762872  | 49763049  | three_prime | TMBIM6   | transmembrane BAX inhibitor motif containing 6                              | mRNA |
| chr12 | 49763057  | 49763174  | three_prime | TMBIM6   | transmembrane BAX inhibitor motif containing 6                              | mRNA |
| chr2  | 241352202 | 241352330 | three_prime | SEPTIN2  | septin 2                                                                    | mRNA |
| chr15 | 98961229  | 98961402  | three_prime | IGF1R    | insulin like growth factor 1 receptor                                       | mRNA |
| chr1  | 156742129 | 156742524 | three_prime | HDGF     | heparin binding growth factor                                               | mRNA |
| chr11 | 102231071 | 102231232 | three_prime | YAP1     | Yes associated protein 1                                                    | mRNA |
| chr1  | 8861005   | 8861429   | three_prime | ENO1     | enolase 1                                                                   | mRNA |

Supplementary Table S4\_Specific Peaks bound to PURa in CLIP-seq\_PURa vs IgG

|       |           |           |             |          |                                                               |      |
|-------|-----------|-----------|-------------|----------|---------------------------------------------------------------|------|
| chr12 | 48936217  | 48936265  | three_prime | ARF3     | ADP ribosylation factor 3                                     | mRNA |
| chr12 | 48936294  | 48936423  | three_prime | ARF3     | ADP ribosylation factor 3                                     | mRNA |
| chr19 | 583064    | 583082    | three_prime | BSG      | basigin (Ok blood group)                                      | mRNA |
| chr14 | 102081399 | 102081821 | three_prime | HSP90AA1 | heat shock protein 90 alpha family class A member 1           | mRNA |
| chr8  | 97851472  | 97851593  | three_prime | LAPTM4B  | lysosomal protein transmembrane 4 beta                        | mRNA |
| chr8  | 97851599  | 97851831  | three_prime | LAPTM4B  | lysosomal protein transmembrane 4 beta                        | mRNA |
| chr5  | 151663074 | 151663177 | three_prime | SPARC    | secreted protein acidic and cysteine rich                     | mRNA |
| chr5  | 151663180 | 151663352 | three_prime | SPARC    | secreted protein acidic and cysteine rich                     | mRNA |
| chr5  | 151663377 | 151663419 | three_prime | SPARC    | secreted protein acidic and cysteine rich                     | mRNA |
| chr1  | 161072130 | 161072569 | three_prime | NECTIN4  | nectin cell adhesion molecule 4                               | mRNA |
| chr9  | 130135427 | 130135605 | three_prime | GPR107   | G protein-coupled receptor 107                                | mRNA |
| chr9  | 130135779 | 130135880 | three_prime | GPR107   | G protein-coupled receptor 107                                | mRNA |
| chr1  | 54851750  | 54852055  | three_prime | DHCR24   | 24-dehydrocholesterol reductase                               | mRNA |
| chr12 | 12913264  | 12913619  | three_prime | GPRC5A   | G protein-coupled receptor, class C, group 5, member A        | mRNA |
| chr1  | 54850883  | 54851273  | three_prime | DHCR24   | 24-dehydrocholesterol reductase                               | mRNA |
| chr1  | 160998147 | 160998350 | three_prime | F11R     | F11 receptor                                                  | mRNA |
| chr1  | 160998354 | 160998630 | three_prime | F11R     | F11 receptor                                                  | mRNA |
| chr17 | 59839906  | 59840184  | three_prime | VMP1     | vacuole membrane protein 1                                    | mRNA |
| chr14 | 102081031 | 102081398 | three_prime | HSP90AA1 | heat shock protein 90 alpha family class A member 1           | mRNA |
| chr11 | 18407320  | 18407826  | three_prime | LDHA     | lactate dehydrogenase A                                       | mRNA |
| chr12 | 6346817   | 6347300   | three_prime | SCNN1A   | sodium channel epithelial 1 alpha subunit                     | mRNA |
| chr11 | 57817005  | 57817345  | three_prime | CTNND1   | catenin delta 1                                               | mRNA |
| chr3  | 195746895 | 195747207 | three_prime | MUC4     | mucin 4, cell surface associated                              | mRNA |
| chr3  | 195747235 | 195747380 | three_prime | MUC4     | mucin 4, cell surface associated                              | mRNA |
| chr7  | 74196253  | 74196339  | three_prime | EIF4H    | eukaryotic translation initiation factor 4H                   | mRNA |
| chr16 | 68834529  | 68834670  | three_prime | CDH1     | cadherin 1                                                    | mRNA |
| chr16 | 68834672  | 68834750  | three_prime | CDH1     | cadherin 1                                                    | mRNA |
| chr16 | 68834764  | 68835011  | three_prime | CDH1     | cadherin 1                                                    | mRNA |
| chr10 | 71816296  | 71816566  | three_prime | PSAP     | prosaposin                                                    | mRNA |
| chr10 | 71816567  | 71816923  | three_prime | PSAP     | prosaposin                                                    | mRNA |
| chr3  | 196049807 | 196050186 | three_prime | TFR3     | transferrin receptor                                          | mRNA |
| chr3  | 196050332 | 196050452 | three_prime | TFR3     | transferrin receptor                                          | mRNA |
| chr8  | 11844384  | 11844428  | three_prime | CTSB     | cathepsin B                                                   | mRNA |
| chr8  | 11844429  | 11844637  | three_prime | CTSB     | cathepsin B                                                   | mRNA |
| chr8  | 11844710  | 11844978  | three_prime | CTSB     | cathepsin B                                                   | mRNA |
| chr8  | 11844991  | 11845059  | three_prime | CTSB     | cathepsin B                                                   | mRNA |
| chr1  | 205713772 | 205713943 | three_prime | NUCKS1   | nuclear casein kinase and cyclin-dependent kinase substrate 1 | mRNA |
| chr1  | 205714103 | 205714217 | three_prime | NUCKS1   | nuclear casein kinase and cyclin-dependent kinase substrate 1 | mRNA |
| chr1  | 205714344 | 205714436 | three_prime | NUCKS1   | nuclear casein kinase and cyclin-dependent kinase substrate 1 | mRNA |
| chr20 | 37518009  | 37518190  | three_prime | BLCAP    | BLCAP apoptosis inducing factor                               | mRNA |
| chr20 | 37518328  | 37518512  | three_prime | BLCAP    | BLCAP apoptosis inducing factor                               | mRNA |
| chr11 | 102396665 | 102396968 | three_prime | TMEM123  | transmembrane protein 123                                     | mRNA |
| chr11 | 102396970 | 102397353 | three_prime | TMEM123  | transmembrane protein 123                                     | mRNA |
| chr11 | 102397354 | 102397485 | three_prime | TMEM123  | transmembrane protein 123                                     | mRNA |
| chr9  | 33441189  | 33441994  | three_prime | AQP3     | aquaporin 3 (Gill blood group)                                | mRNA |
| chr7  | 45912779  | 45913715  | three_prime | IGFBP3   | insulin like growth factor binding protein 3                  | mRNA |
| chr7  | 45913716  | 45913834  | three_prime | IGFBP3   | insulin like growth factor binding protein 3                  | mRNA |
| chr13 | 110892942 | 110892959 | three_prime | ANKRD10  | ankyrin repeat domain 10                                      | mRNA |
| chr1  | 26877881  | 26877905  | three_prime | GPN2     | GPN-loop GTPase 2                                             | mRNA |
| chr19 | 44384808  | 44384834  | three_prime | ZNF285   | zinc finger protein 285                                       | mRNA |
| chr1  | 53084875  | 53084907  | three_prime | PODN     | podocan                                                       | mRNA |
| chr13 | 36224964  | 36224980  | three_prime | CCDC169  | coiled-coil domain containing 169                             | mRNA |
| chr1  | 161037684 | 161037733 | three_prime | TSTD1    | thiosulfate sulfurtransferase like domain containing 1        | mRNA |
| chr7  | 131502621 | 131502678 | three_prime | PODXL    | podocalyxin like                                              | mRNA |
| chr7  | 131502680 | 131502811 | three_prime | PODXL    | podocalyxin like                                              | mRNA |
| chr22 | 38483521  | 38483620  | three_prime | DDX17    | DEAD-box helicase 17                                          | mRNA |
| chr22 | 38485482  | 38485522  | three_prime | DDX17    | DEAD-box helicase 17                                          | mRNA |
| chr17 | 58004979  | 58005020  | three_prime | SRSF1    | serine and arginine rich splicing factor 1                    | mRNA |
| chr17 | 58005038  | 58005220  | three_prime | SRSF1    | serine and arginine rich splicing factor 1                    | mRNA |
| chr2  | 203427263 | 203427323 | three_prime | ABI2     | abl interactor 2                                              | mRNA |
| chr19 | 48197135  | 48197224  | three_prime | ZSWIM9   | zinc finger SWIM-type containing 9                            | mRNA |
