# Supplementary material for: Forming cytoplasmic stress granules PURα suppresses mRNA translation initiation of IGFBP3 to promote esophageal squamous cell carcinoma progression
Source: PubMed Central journal article supplement (PMC9481463; doi:10.1038/s41388-022-02426-3), 2022-08-09
Supplement: 41388_2022_2426_MOESM3_ESM.pdf [file 41388_2022_2426_MOESM3_ESM.pdf]

## PURA-interacting proteins

| Protein ID | Gene name | Unique peptide | Score  | Intensity | LFQ IgG | LFQ PURA | Ratio(PURA/IgG) |
|------------|-----------|----------------|--------|-----------|---------|----------|-----------------|
| G3V311     | PLEKHG3   | 4              | 32.224 | 73558000  | 0       | 10086000 | 100             |
| P26640     | VARS      | 1              | 6.1179 | 2971600   | 0       | 241050   | 100             |
| P29372     | MPG       | 3              | 17.64  | 33067000  | 0       | 17725000 | 100             |
| P56192     | MARS      | 1              | 12.402 | 5855000   | 0       | 1734200  | 100             |
| P51610     | HCFC1     | 1              | 8.369  | 6219200   | 0       | 504470   | 100             |
| P54578     | USP14     | 1              | 18.675 | 8729900   | 0       | 2191000  | 100             |
| Q16540     | MRPL23    | 2              | 13.779 | 17123000  | 0       | 7017200  | 100             |
| A6NNP5     | CCDC169   | 1              | 6.0578 | 132080000 | 0       | 2211300  | 100             |
| Q9P2M7     | CGN       | 3              | 27.78  | 36590000  | 0       | 2968000  | 100             |
| Q8IXW7     | FMR1      | 3              | 21.283 | 30929000  | 0       | 6773600  | 100             |
| A8MT70     | ZBBX      | 1              | 9.5805 | 228820000 | 0       | 28494000 | 100             |
| Q8IYB3     | SRRM1     | 5              | 81.588 | 108040000 | 0       | 8350900  | 100             |
| Q9Y262     | EIF3L     | 1              | 27.273 | 10004000  | 0       | 1787600  | 100             |
| Q01844     | EWSR1     | 3              | 31.383 | 52613000  | 0       | 15583000 | 100             |
| O94905     | ERLIN2    | 1              | 6.62   | 10861000  | 0       | 5822100  | 100             |
| P12956     | XRCC6     | 2              | 11.303 | 14753000  | 0       | 2593100  | 100             |
| Q9BPZ7     | MAPKAP1   | 1              | 6.8737 | 4588300   | 0       | 1359000  | 100             |
| P49760     | CLK2      | 2              | 13.127 | 20855000  | 0       | 5234100  | 100             |
| Q9HB71     | CACYBP    | 1              | 7.3171 | 10650000  | 0       | 8427000  | 100             |
| Q92769     | HDAC2     | 3              | 17.725 | 29801000  | 0       | 7479400  | 100             |
| O00303     | EIF3F     | 1              | 10.662 | 13603000  | 0       | 1102600  | 100             |
| P55209     | NAP1L1    | 1              | 20.063 | 49564000  | 0       | 12440000 | 100             |
| P68431     | H3C1      | 1              | 15.461 | 22977000  | 0       | 9416400  | 100             |
| P27824     | CANX      | 1              | 6.1697 | 5208600   | 0       | 1542700  | 100             |
| O60583     | CCNT2     | 3              | 34.044 | 21702000  | 0       | 6427900  | 100             |
| O75569     | PRKRA     | 1              | 6.6866 | 995770    | 0       | 533770   | 100             |
| P36542     | ATP5C1    | 3              | 17.196 | 2976500   | 0       | 1595500  | 100             |
| P52815     | MRPL12    | 3              | 19.047 | 19489000  | 0       | 7987200  | 100             |
| Q9BY77     | POLDIP3   | 3              | 27.283 | 26268000  | 0       | 6187600  | 100             |
| O00472     | ELL2      | 1              | 6.2258 | 3377800   | 0       | 1000500  | 100             |
| Q9Y697     | NFS1      | 1              | 26.714 | 62959000  | 0       | 5238800  | 100             |
| P40227     | CCT6A     | 4              | 24.447 | 46456000  | 0       | 11659000 | 100             |
| P62191     | PSMC1     | 3              | 23.974 | 29278000  | 0       | 6122300  | 100             |
| Q96SB4     | SRPK1     | 4              | 29.335 | 33267000  | 0       | 9143100  | 100             |
| Q14103     | HNRNPD    | 1              | 7.5842 | 56695000  | 0       | 4207800  | 100             |
| P49368     | CCT3      | 5              | 52.027 | 77228000  | 0       | 19383000 | 100             |
| O60248     | SOX15     | 1              | 9.3598 | 16712000  | 0       | 16463000 | 100             |
| P61163     | ACTR1A    | 2              | 29.356 | 20687000  | 0       | 2245900  | 100             |
| Q9H078     | CLPB      | 2              | 10.508 | 31036000  | 0       | 5834000  | 100             |
| P51114     | FXR1      | 6              | 72.236 | 86572000  | 0       | 21955000 | 100             |
| O60812     | HNRNPC    | 5              | 29.977 | 72611000  | 0       | 35143000 | 100             |
| Q9H0D6     | XRN2      | 4              | 24.432 | 30414000  | 0       | 9008300  | 100             |
| P35606     | COPB2     | 2              | 12.653 | 19676000  | 0       | 5827800  | 100             |
| P29401     | TKT       | 3              | 20.772 | 23527000  | 0       | 5904700  | 100             |
| Q96ME7     | ZNF512    | 1              | 12.124 | 21736000  | 0       | 5455200  | 100             |
| P84103     | SRSF3     | 2              | 11.918 | 88069000  | 0       | 59337000 | 100             |
| Q8NEM7     | SUPT20H   | 1              | 6.8153 | 8858400   | 0       | 2623800  | 100             |
| P27105     | STOM      | 2              | 10.734 | 13624000  | 0       | 7303100  | 100             |
| Q9Y285     | FARSA     | 1              | 6.0652 | 3183900   | 0       | 799090   | 100             |
| Q15084     | PDIA6     | 1              | 7      | 8428900   | 0       | 2115500  | 100             |
| P62826     | RAN       | 1              | 5.9917 | 10034000  | 0       | 9884900  | 100             |
| P50991     | CCT4      | 3              | 20.192 | 33218000  | 0       | 7020000  | 100             |
| Q14151     | SAFB2     | 2              | 43.1   | 19951000  | 0       | 1618300  | 100             |
| Q6ZVM7     | TOM1L2    | 2              | 25.616 | 21136000  | 0       | 4107900  | 100             |

Supplementary Table S5\_PUR -interacting proteins

|        |          |   |        |           |   |           |     |
|--------|----------|---|--------|-----------|---|-----------|-----|
| P17174 | GOT1     | 1 | 6.432  | 94889000  | 0 | 8874500   | 100 |
| P22061 | PCMT1    | 1 | 6.1587 | 2213500   | 0 | 2180600   | 100 |
| Q9UBQ5 | EIF3K    | 1 | 7.5824 | 4667700   | 0 | 4598300   | 100 |
| P48643 | CCT5     | 2 | 12.251 | 20672000  | 0 | 5188300   | 100 |
| P61604 | HSPE1    | 2 | 13.554 | 13305000  | 0 | 7877000   | 100 |
| Q8IZL8 | PELP1    | 2 | 29.334 | 40447000  | 0 | 3280900   | 100 |
| Q9HAV0 | GNB4     | 3 | 32.414 | 58989000  | 0 | 6982500   | 100 |
| Q9BRJ6 | C7orf50  | 3 | 24.315 | 28173000  | 0 | 23224000  | 100 |
| Q9NX63 | CHCHD3   | 4 | 29.761 | 36915000  | 0 | 33878000  | 100 |
| Q9BWE0 | REPIN1   | 1 | 7.3823 | 19486000  | 0 | 4890500   | 100 |
| P35249 | RFC4     | 2 | 12.752 | 19468000  | 0 | 10436000  | 100 |
| P02538 | KRT6A    | 1 | 46.672 | 303960000 | 0 | 75731000  | 100 |
| P20930 | FLG      | 1 | 7.9534 | 7671100   | 0 | 5745800   | 100 |
| Q5D862 | FLG2     | 4 | 54.647 | 53519000  | 0 | 14683000  | 100 |
| Q8N1N4 | KRT78    | 1 | 6.0117 | 8792900   | 0 | 1590100   | 100 |
| Q7Z794 | KRT77    | 1 | 13.893 | 17527000  | 0 | 3417300   | 100 |
| P78344 | EIF4G2   | 1 | 6.1125 | 7323100   | 0 | 2169000   | 100 |
| P22234 | PAICS    | 2 | 11.194 | 4104300   | 0 | 445580    | 100 |
| Q8IWZ3 | ANKHD1   | 1 | 61.791 | 547230000 | 0 | 58153000  | 100 |
| O75122 | CLASP2   | 2 | 15.951 | 9729400   | 0 | 2067900   | 100 |
| P63104 | YWHAZ    | 1 | 6.7236 | 11229000  | 0 | 8941600   | 100 |
| Q15369 | TCEB1    | 1 | 6.4135 | 6216900   | 0 | 10322000  | 100 |
| P62888 | RPL30    | 4 | 24.712 | 44944000  | 0 | 12818000  | 100 |
| P63208 | SKP1     | 1 | 6.5717 | 9416200   | 0 | 3859000   | 100 |
| Q9P0K7 | RAI14    | 4 | 93.337 | 79836000  | 0 | 7242000   | 100 |
| Q96C57 | CUSTOS   | 1 | 12.124 | 16356000  | 0 | 5958900   | 100 |
| P50914 | RPL14    | 1 | 6.7716 | 94932000  | 0 | 50259000  | 100 |
| O60784 | TOM1     | 2 | 23.84  | 5449900   | 0 | 851630    | 100 |
| Q9Y520 | PRRC2C   | 4 | 54.642 | 51296000  | 0 | 4160900   | 100 |
| Q86VM9 | ZC3H18   | 8 | 46.579 | 80265000  | 0 | 6599300   | 100 |
| Q03001 | DST      | 9 | 73.138 | 92335000  | 0 | 6981400   | 100 |
| Q9BTC8 | MTA3     | 2 | 12.831 | 17895000  | 0 | 4187100   | 100 |
| Q15154 | PCM1     | 2 | 20.806 | 25636000  | 0 | 1585600   | 100 |
| P62847 | RPS24    | 2 | 10.935 | 8658900   | 0 | 3097600   | 100 |
| P68400 | CSNK2A1  | 1 | 9.0469 | 5743700   | 0 | 623570    | 100 |
| P78527 | PRKDC    | 9 | 67.972 | 76261000  | 0 | 6185900   | 100 |
| Q7Z5J4 | RAI1     | 5 | 54.025 | 67873000  | 0 | 5505500   | 100 |
| Q14203 | DCTN1    | 1 | 6.6981 | 6762600   | 0 | 548550    | 100 |
| E9PBL8 | COG1     | 1 | 6.3801 | 22015000  | 0 | 1147400   | 100 |
| Q5JNZ6 | RBBP7    | 1 | 12.576 | 24084000  | 0 | 6044600   | 100 |
| Q9P275 | USP36    | 1 | 15.062 | 19331000  | 0 | 5273800   | 100 |
| P27348 | YWHAQ    | 1 | 6.7236 | 11066000  | 0 | 5872600   | 100 |
| P28290 | SSFA2    | 2 | 20.379 | 8557700   | 0 | 694150    | 100 |
| P17980 | PSMC3    | 2 | 17.122 | 11689000  | 0 | 2933800   | 100 |
| P17480 | UBTF     | 1 | 12.563 | 18451000  | 0 | 3661500   | 100 |
| Q14444 | CAPRIN1  | 3 | 21.173 | 57236000  | 0 | 16953000  | 100 |
| P46776 | RPL27A   | 4 | 27.705 | 438360000 | 0 | 179680000 | 100 |
| Q9UHX1 | PUF60    | 2 | 17.897 | 26049000  | 0 | 6537800   | 100 |
| Q9NPD3 | EXOSC4   | 2 | 12.794 | 10522000  | 0 | 10366000  | 100 |
| O43159 | RRP8     | 2 | 17.514 | 22292000  | 0 | 5594900   | 100 |
| Q9Y4A5 | TRRAP    | 1 | 8.1434 | 19949000  | 0 | 1122500   | 100 |
| P78371 | CCT2     | 6 | 66.03  | 70932000  | 0 | 13429000  | 100 |
| Q9UJS0 | SLC25A13 | 1 | 8.8467 | 12475000  | 0 | 3131000   | 100 |
| Q66PJ3 | ARL6IP4  | 2 | 11.665 | 4813600   | 0 | 1906700   | 100 |
| P08195 | SLC3A2   | 3 | 28.954 | 42390000  | 0 | 9208900   | 100 |
| Q13523 | PRPF4B   | 1 | 6.3118 | 11893000  | 0 | 964680    | 100 |

Supplementary Table S5\_PUR -interacting proteins

|        |          |   |        |           |   |           |     |
|--------|----------|---|--------|-----------|---|-----------|-----|
| Q14152 | EIF3A    | 4 | 23.56  | 17748000  | 0 | 1439600   | 100 |
| Q5JTH9 | RRP12    | 2 | 14.289 | 8414000   | 0 | 682500    | 100 |
| Q9BSC4 | NOL10    | 3 | 27.791 | 14577000  | 0 | 3479500   | 100 |
| Q12931 | TRAP1    | 2 | 16.199 | 7704800   | 0 | 2282100   | 100 |
| P07237 | P4HB     | 1 | 6.2758 | 8946100   | 0 | 1711200   | 100 |
| P49790 | NUP153   | 6 | 40.178 | 49100000  | 0 | 4420000   | 100 |
| Q5T3P9 | LGALS8   | 3 | 18.364 | 19017000  | 0 | 8980300   | 100 |
| O14639 | ABLIM1   | 2 | 15.183 | 25409000  | 0 | 5529800   | 100 |
| Q9P031 | CCDC59   | 3 | 19.038 | 25297000  | 0 | 13560000  | 100 |
| P27708 | CAD      | 2 | 13.977 | 16914000  | 0 | 1372000   | 100 |
| Q14157 | UBAP2L   | 2 | 10.774 | 13012000  | 0 | 1055400   | 100 |
| P27635 | RPL10    | 4 | 23.759 | 156710000 | 0 | 142550000 | 100 |
| P46060 | RANGAP1  | 3 | 25.424 | 38642000  | 0 | 11445000  | 100 |
| P41091 | EIF2S3   | 1 | 22.075 | 17896000  | 0 | 3541900   | 100 |
| Q9Y6M1 | IGF2BP2  | 1 | 7.1366 | 3948400   | 0 | 990980    | 100 |
| O43663 | PRC1     | 2 | 11.395 | 10713000  | 0 | 3173100   | 100 |
| Q9H8H2 | DDX31    | 1 | 8.617  | 12830000  | 0 | 2900700   | 100 |
| Q8N1G0 | ZNF687   | 1 | 7.2841 | 14391000  | 0 | 2697600   | 100 |
| Q14257 | RCN2     | 5 | 67.171 | 119010000 | 0 | 15136000  | 100 |
| Q9BVJ6 | UTP14A   | 1 | 6.0077 | 2384400   | 0 | 706230    | 100 |
| Q9NY93 | DDX56    | 4 | 56.272 | 58546000  | 0 | 14694000  | 100 |
| P04792 | HSPB1    | 1 | 10.437 | 7933800   | 0 | 7815800   | 100 |
| Q86WX3 | RPS19BP1 | 1 | 9.6468 | 7995000   | 0 | 2609100   | 100 |
| Q9BRK5 | SDF4     | 3 | 19.772 | 15285000  | 0 | 2733900   | 100 |
| P84090 | ERH      | 1 | 153.21 | 239830000 | 0 | 397200000 | 100 |
| Q9GZT3 | SLIRP    | 1 | 6.73   | 17330000  | 0 | 18177000  | 100 |
| Q9NWN3 | FBXO34   | 1 | 6.7031 | 3081600   | 0 | 912730    | 100 |
| P36957 | DLST     | 1 | 10.795 | 14226000  | 0 | 3570400   | 100 |
| Q9GZR7 | DDX24    | 7 | 39.102 | 47375000  | 0 | 11636000  | 100 |
| P40926 | MDH2     | 1 | 6.6727 | 2.622E+09 | 0 | 337480000 | 100 |
| Q07157 | TJP1     | 1 | 11.761 | 6501700   | 0 | 527380    | 100 |
| H7C3G6 | MPRIP    | 5 | 53.313 | 26900000  | 0 | 2010400   | 100 |
| Q5SW79 | CEP170   | 1 | 13.976 | 4057900   | 0 | 1201900   | 100 |
| P12268 | IMPDH2   | 3 | 24.171 | 13981000  | 0 | 3508800   | 100 |
| Q7Z6Z7 | HUWE1    | 1 | 6.0004 | 4178500   | 0 | 338940    | 100 |
| O43852 | CALU     | 1 | 6.5634 | 2394800   | 0 | 259990    | 100 |
| P49736 | MCM2     | 1 | 6.0224 | 2904900   | 0 | 235630    | 100 |
| O94964 | SOGA1    | 6 | 36.135 | 57883000  | 0 | 4695200   | 100 |
| P46779 | RPL28    | 6 | 43.887 | 54994000  | 0 | 20039000  | 100 |
| Q9BZF9 | UACA     | 3 | 20.927 | 26917000  | 0 | 2183400   | 100 |
| O00161 | SNAP23   | 2 | 12.227 | 15378000  | 0 | 15149000  | 100 |
| Q8N1F7 | NUP93    | 3 | 30.091 | 18384000  | 0 | 5445100   | 100 |
| Q13421 | MSLN     | 3 | 22.329 | 46432000  | 0 | 7153700   | 100 |
| Q15287 | RNPS1    | 1 | 7.3425 | 13614000  | 0 | 3416800   | 100 |
| P12830 | CDH1     | 1 | 8.7133 | 11170000  | 0 | 906090    | 100 |
| P22695 | UQCRC2   | 1 | 6.3981 | 2619100   | 0 | 284350    | 100 |
| P04075 | ALDOA    | 3 | 23.217 | 39462000  | 0 | 21153000  | 100 |
| P07741 | APRT     | 1 | 6.2578 | 4627500   | 0 | 1307200   | 100 |
| Q7L2E3 | DHX30    | 7 | 109.51 | 117720000 | 0 | 9267400   | 100 |
| Q9Y5Q8 | GTF3C5   | 1 | 6.8034 | 990340    | 0 | 248550    | 100 |
| P17096 | HMGA1    | 1 | 9.603  | 3506600   | 0 | 1437100   | 100 |
| P51991 | HNRNPA3  | 1 | 6.4648 | 5553200   | 0 | 2976700   | 100 |
| Q99460 | PSMD1    | 1 | 6.5962 | 2234300   | 0 | 661770    | 100 |
| Q14156 | EFR3A    | 1 | 6.3115 | 9765200   | 0 | 2892400   | 100 |
| Q9HC36 | MRM3     | 1 | 7.8749 | 41270000  | 0 | 10358000  | 100 |
| Q02978 | SLC25A11 | 1 | 10.093 | 84636000  | 0 | 34884000  | 100 |

Supplementary Table S5\_PUR -interacting proteins

|        |          |    |        |           |   |           |     |
|--------|----------|----|--------|-----------|---|-----------|-----|
| Q9UPN4 | CEP131   | 1  | 5.9413 | 1979900   | 0 | 160600    | 100 |
| Q9UJV9 | DDX41    | 2  | 35.97  | 40257000  | 0 | 7902600   | 100 |
| P27448 | MARK3    | 3  | 21.75  | 13372000  | 0 | 3960700   | 100 |
| Q9Y4F5 | CEP170B  | 6  | 61.182 | 78418000  | 0 | 6360900   | 100 |
| Q9Y2R9 | MRPS7    | 7  | 44.147 | 75320000  | 0 | 64183000  | 100 |
| P51648 | ALDH3A2  | 2  | 14.278 | 24188000  | 0 | 6070700   | 100 |
| O00231 | PSMD11   | 1  | 6.2305 | 2417200   | 0 | 262420    | 100 |
| Q15029 | EFTUD2   | 6  | 44.231 | 62801000  | 0 | 5094100   | 100 |
| P63010 | AP2B1    | 5  | 35.872 | 46948000  | 0 | 13906000  | 100 |
| P26599 | PTBP1    | 1  | 8.1786 | 7205100   | 0 | 1808300   | 100 |
| Q9BYD3 | MRPL4    | 1  | 14.793 | 15173000  | 0 | 5734500   | 100 |
| O60437 | PPL      | 2  | 17.291 | 4789000   | 0 | 388460    | 100 |
| P35268 | RPL22    | 2  | 11.118 | 37821000  | 0 | 15500000  | 100 |
| P62841 | RPS15    | 2  | 15.097 | 29787000  | 0 | 11489000  | 100 |
| O14579 | COPE     | 1  | 6.8772 | 7220700   | 0 | 2365600   | 100 |
| Q86YD1 | PTOV1    | 2  | 11.35  | 6919100   | 0 | 1844500   | 100 |
| O43823 | AKAP8    | 2  | 11.267 | 9918800   | 0 | 2937800   | 100 |
| P46782 | RPS5     | 6  | 54.8   | 151900000 | 0 | 141890000 | 100 |
| Q9NQT4 | EXOSC5   | 1  | 6.1767 | 3162200   | 0 | 3115200   | 100 |
| Q02543 | RPL18A   | 2  | 11.333 | 6269500   | 0 | 2569400   | 100 |
| O00139 | KIF2A    | 10 | 132.38 | 94776000  | 0 | 27227000  | 100 |
| O00257 | CBX4     | 2  | 16.368 | 15354000  | 0 | 4406500   | 100 |
| O00411 | POLRMT   | 5  | 67.228 | 54954000  | 0 | 3862800   | 100 |
| O00425 | IGF2BP3  | 4  | 50.268 | 37392000  | 0 | 8493900   | 100 |
| O14556 | GAPDHS   | 1  | 6.8782 | 7.257E+09 | 0 | 840980000 | 100 |
| O15226 | NKRF     | 1  | 8.2834 | 3398000   | 0 | 1006400   | 100 |
| O15269 | SPTLC1   | 3  | 19.304 | 18731000  | 0 | 4701200   | 100 |
| O15446 | POLR1G   | 1  | 5.9407 | 5951500   | 0 | 1762800   | 100 |
| O43172 | PRPF4    | 12 | 121.56 | 304030000 | 0 | 76305000  | 100 |
| O43290 | SART1    | 1  | 7.1203 | 3395100   | 0 | 1005600   | 100 |
| O43293 | DAPK3    | 1  | 9.5016 | 11422000  | 0 | 1956600   | 100 |
| O43390 | HNRNPR   | 2  | 11.068 | 52254000  | 0 | 14343000  | 100 |
| O43734 | TRAF3IP2 | 2  | 15.768 | 19031000  | 0 | 4776300   | 100 |
| O60292 | SIPA1L3  | 2  | 19.893 | 28350000  | 0 | 2299600   | 100 |
| O60506 | SYNCRIP  | 2  | 21.878 | 79627000  | 0 | 17040000  | 100 |
| O60563 | CCNT1    | 1  | 23.514 | 13561000  | 0 | 4016500   | 100 |
| O60701 | UGDH     | 1  | 11.834 | 5708600   | 0 | 1432700   | 100 |
| O60884 | DNAJA2   | 2  | 15.63  | 15311000  | 0 | 1379700   | 100 |
| O75083 | WDR1     | 2  | 12.267 | 6363600   | 0 | 1597100   | 100 |
| O75319 | DUSP11   | 3  | 22.701 | 23238000  | 0 | 10491000  | 100 |
| O75330 | HMMR     | 3  | 63.248 | 34649000  | 0 | 7269300   | 100 |
| O75400 | PRPF40A  | 4  | 36.311 | 55811000  | 0 | 3976800   | 100 |
| O75486 | SUPT3H   | 1  | 11.874 | 3034000   | 0 | 1626300   | 100 |
| O75494 | SRSF10   | 1  | 20.534 | 9956700   | 0 | 6736200   | 100 |
| O75607 | NPM3     | 1  | 7.9035 | 20608000  | 0 | 19551000  | 100 |
| O75643 | SNRNP200 | 6  | 64.55  | 58721000  | 0 | 4763100   | 100 |
| O75683 | SURF6    | 1  | 6.5082 | 5995000   | 0 | 650850    | 100 |
| O75821 | EIF3G    | 2  | 11.298 | 22573000  | 0 | 2450600   | 100 |
| O75909 | CCNK     | 2  | 21.857 | 25135000  | 0 | 7444600   | 100 |
| O75934 | BCAS2    | 3  | 18.961 | 24547000  | 0 | 24182000  | 100 |
| O76031 | CLPX     | 1  | 5.9838 | 12999000  | 0 | 3850200   | 100 |
| O94761 | RECQL4   | 1  | 10.659 | 8407700   | 0 | 681990    | 100 |
| O94906 | PRPF6    | 2  | 12.84  | 22089000  | 0 | 6542500   | 100 |
| O95478 | NSA2     | 1  | 6.5131 | 9554000   | 0 | 5121300   | 100 |
| O95810 | SDPR     | 2  | 19.404 | 12471000  | 0 | 3130100   | 100 |
| O95831 | AIFM1    | 2  | 11.113 | 16395000  | 0 | 4114800   | 100 |

Supplementary Table S5\_PUR -interacting proteins

|        |           |    |        |           |   |          |     |
|--------|-----------|----|--------|-----------|---|----------|-----|
| P00367 | GLUD1     | 5  | 45.466 | 94073000  | 0 | 21524000 | 100 |
| P00966 | ASS1      | 1  | 34.27  | 243170000 | 0 | 30059000 | 100 |
| P01876 | IGHA1     | 3  | 18.016 | 24663000  | 0 | 6190000  | 100 |
| P02792 | FTL       | 1  | 9.9961 | 11126000  | 0 | 4559600  | 100 |
| P04083 | ANXA1     | 4  | 25.553 | 24325000  | 0 | 13039000 | 100 |
| P04350 | TUBB4A    | 1  | 8.2718 | 3040600   | 0 | 763130   | 100 |
| P04843 | RPN1      | 5  | 38.004 | 54889000  | 0 | 12825000 | 100 |
| P04844 | RPN2      | 1  | 28.405 | 5973200   | 0 | 1499100  | 100 |
| P04899 | GNAI2     | 2  | 15.386 | 21542000  | 0 | 10009000 | 100 |
| P05023 | ATP1A1    | 4  | 33.198 | 40005000  | 0 | 7027000  | 100 |
| P05198 | EIF2S1    | 1  | 7.8441 | 19672000  | 0 | 10545000 | 100 |
| P05386 | RPLP1     | 2  | 40.393 | 158940000 | 0 | 43922000 | 100 |
| P06858 | LPL       | 1  | 12.154 | 4236800   | 0 | 459970   | 100 |
| P07195 | LDHB      | 3  | 16.747 | 23850000  | 0 | 11006000 | 100 |
| P07948 | LYN       | 6  | 53.049 | 98893000  | 0 | 20199000 | 100 |
| P08651 | NFIC      | 4  | 71.083 | 33330000  | 0 | 7965800  | 100 |
| Q99878 | HIST1H2AJ | 2  | 83.135 | 105260000 | 0 | 40066000 | 100 |
| P10696 | ALPPL2    | 1  | 12.402 | 7417500   | 0 | 1861600  | 100 |
| P12814 | ACTN1     | 9  | 64.722 | 74118000  | 0 | 16977000 | 100 |
| P13639 | EEF2      | 3  | 18.44  | 7886700   | 0 | 2335900  | 100 |
| P13674 | P4HA1     | 2  | 11.426 | 16298000  | 0 | 4090500  | 100 |
| P14618 | PKM       | 7  | 61.894 | 105320000 | 0 | 26433000 | 100 |
| P14625 | HSP90B1   | 2  | 25.886 | 43384000  | 0 | 9426900  | 100 |
| P14649 | MYL6B     | 5  | 37.962 | 58358000  | 0 | 57490000 | 100 |
| P16615 | ATP2A2    | 5  | 49.812 | 75001000  | 0 | 18340000 | 100 |
| P48741 | HSPA7     | 1  | 6.8542 | 49342000  | 0 | 2949400  | 100 |
| P17302 | GJA1      | 1  | 19.31  | 25786000  | 0 | 2799400  | 100 |
| P17987 | TCP1      | 3  | 19.412 | 45634000  | 0 | 9673100  | 100 |
| P20700 | LMNB1     | 2  | 17.858 | 22629000  | 0 | 6333600  | 100 |
| P22626 | HNRNPA2B1 | 3  | 17.272 | 40910000  | 0 | 21929000 | 100 |
| P25205 | MCM3      | 2  | 13.076 | 17726000  | 0 | 5250300  | 100 |
| P26232 | CTNNA2    | 1  | 13.127 | 53768000  | 0 | 10754000 | 100 |
| P26641 | EEF1G     | 5  | 42.849 | 116710000 | 0 | 22783000 | 100 |
| P28066 | PSMA5     | 1  | 15.549 | 6888400   | 0 | 5017500  | 100 |
| P30414 | NKTR      | 1  | 6.2669 | 285940000 | 0 | 31043000 | 100 |
| P31689 | DNAJA1    | 3  | 27.165 | 50069000  | 0 | 4637500  | 100 |
| P31944 | CASP14    | 2  | 11.052 | 8836400   | 0 | 5447100  | 100 |
| P35232 | PHB       | 3  | 19.053 | 10791000  | 0 | 10631000 | 100 |
| P35250 | RFC2      | 3  | 18.638 | 54271000  | 0 | 19422000 | 100 |
| P35251 | RFC1      | 6  | 48.559 | 66018000  | 0 | 5532600  | 100 |
| P35658 | NUP214    | 2  | 13.204 | 14430000  | 0 | 1170500  | 100 |
| P35749 | MYH11     | 2  | 19.432 | 37803000  | 0 | 298970   | 100 |
| P40938 | RFC3      | 1  | 152.17 | 21635000  | 0 | 6097900  | 100 |
| P40939 | HADHA     | 12 | 177.75 | 187530000 | 0 | 53177000 | 100 |
| P42166 | TMPO      | 10 | 72.139 | 93384000  | 0 | 27292000 | 100 |
| P46013 | MKI67     | 31 | 323.31 | 550150000 | 0 | 49180000 | 100 |
| P46778 | RPL21     | 2  | 15.853 | 25605000  | 0 | 15271000 | 100 |
| P47929 | LGALS7    | 1  | 6.7329 | 8689500   | 0 | 5353400  | 100 |
| P48047 | ATP5O     | 2  | 13.011 | 56709000  | 0 | 54085000 | 100 |
| P49750 | YLPM1     | 6  | 63.982 | 82754000  | 0 | 6016000  | 100 |
| P49756 | RBM25     | 2  | 11.547 | 9289400   | 0 | 2215700  | 100 |
| P49792 | RANBP2    | 5  | 38.18  | 41933000  | 0 | 3401400  | 100 |
| P50402 | EMD       | 2  | 22.789 | 37060000  | 0 | 15842000 | 100 |
| P50416 | CPT1A     | 1  | 11.555 | 18312000  | 0 | 5424000  | 100 |
| P50750 | CDK9      | 2  | 30.953 | 47925000  | 0 | 13180000 | 100 |
| P50990 | CCT8      | 4  | 25.767 | 47778000  | 0 | 9686100  | 100 |

Supplementary Table S5\_PUR -interacting proteins

|        |          |    |        |           |   |          |     |
|--------|----------|----|--------|-----------|---|----------|-----|
| P51116 | FXR2     | 6  | 71.431 | 76739000  | 0 | 21005000 | 100 |
| P51398 | DAP3     | 5  | 35.855 | 82481000  | 0 | 35640000 | 100 |
| P53597 | SUCLG1   | 1  | 16.073 | 281700000 | 0 | 36778000 | 100 |
| P53618 | COPB1    | 1  | 6.0304 | 7232800   | 0 | 2142300  | 100 |
| P53621 | COPA     | 2  | 12.875 | 39388000  | 0 | 3194900  | 100 |
| P53985 | SLC16A1  | 1  | 6.94   | 7630200   | 0 | 828380   | 100 |
| P53999 | SUB1     | 3  | 21.9   | 75369000  | 0 | 30888000 | 100 |
| P54793 | ARSF     | 1  | 6.3765 | 3154200   | 0 | 139530   | 100 |
| P55084 | HADHB    | 3  | 21.73  | 66394000  | 0 | 6438200  | 100 |
| P55884 | EIF3B    | 3  | 18.97  | 19217000  | 0 | 5691800  | 100 |
| P60174 | TPI1     | 1  | 6.2932 | 9576300   | 0 | 7555800  | 100 |
| P61160 | ACTR2    | 5  | 30.236 | 68151000  | 0 | 6629800  | 100 |
| P61254 | RPL26    | 5  | 28.768 | 49613000  | 0 | 14384000 | 100 |
| P61313 | RPL15    | 4  | 22.839 | 98775000  | 0 | 97306000 | 100 |
| P61626 | LYZ      | 2  | 13.839 | 75956000  | 0 | 11000000 | 100 |
| P61978 | HNRNPK   | 9  | 165.43 | 215710000 | 0 | 49601000 | 100 |
| P61981 | YWHAG    | 2  | 13.678 | 19381000  | 0 | 11825000 | 100 |
| P62081 | RPS7     | 2  | 19.8   | 13341000  | 0 | 13142000 | 100 |
| P62136 | PPP1CA   | 1  | 7.2013 | 15553000  | 0 | 8337200  | 100 |
| P62140 | PPP1CB   | 3  | 39.158 | 104780000 | 0 | 49759000 | 100 |
| P62273 | RPS29    | 1  | 6.9579 | 6693500   | 0 | 5139200  | 100 |
| P62333 | PSMC6    | 1  | 6.1311 | 6556500   | 0 | 711810   | 100 |
| P62805 | HIST1H4A | 5  | 28.992 | 38426000  | 0 | 19887000 | 100 |
| P62851 | RPS25    | 3  | 63.545 | 207380000 | 0 | 73260000 | 100 |
| P62857 | RPS28    | 4  | 32.389 | 121340000 | 0 | 86031000 | 100 |
| P62891 | RPL39    | 2  | 18.568 | 10380000  | 0 | 17234000 | 100 |
| P62899 | RPL31    | 5  | 63.628 | 189460000 | 0 | 76821000 | 100 |
| P62995 | TRA2B    | 3  | 94.089 | 61089000  | 0 | 32746000 | 100 |
| P63092 | GNAS     | 3  | 18.087 | 51398000  | 0 | 4737900  | 100 |
| P63220 | RPS21    | 3  | 16.928 | 17506000  | 0 | 16688000 | 100 |
| P78316 | NOP14    | 2  | 12.297 | 12762000  | 0 | 3779900  | 100 |
| Q01650 | SLC7A5   | 1  | 14.144 | 46343000  | 0 | 20925000 | 100 |
| Q02880 | TOP2B    | 10 | 104.93 | 180560000 | 0 | 12997000 | 100 |
| Q03111 | MLLT1    | 6  | 114.26 | 160970000 | 0 | 46570000 | 100 |
| Q03701 | CEBPZ    | 2  | 41.093 | 21451000  | 0 | 1740000  | 100 |
| Q06210 | GFPT1    | 1  | 11.35  | 5619100   | 0 | 1664300  | 100 |
| Q06587 | RING1    | 4  | 69.713 | 110250000 | 0 | 35068000 | 100 |
| Q06830 | PRDX1    | 3  | 18.321 | 29563000  | 0 | 25602000 | 100 |
| Q07021 | C1QBP    | 3  | 17.997 | 27981000  | 0 | 14999000 | 100 |
| Q07666 | KHDRBS1  | 2  | 15.803 | 17359000  | 0 | 3282500  | 100 |
| Q08380 | LGALS3BP | 2  | 11.005 | 4973200   | 0 | 1473000  | 100 |
| Q08945 | SSRP1    | 3  | 29.088 | 63930000  | 0 | 17546000 | 100 |
| Q12860 | CNTN1    | 2  | 11.677 | 4168500   | 0 | 338120   | 100 |
| Q12962 | TAF10    | 1  | 8.0312 | 8015900   | 0 | 7896600  | 100 |
| Q13155 | AIMP2    | 1  | 10.598 | 7724000   | 0 | 4140400  | 100 |
| Q13200 | PSMD2    | 4  | 29.077 | 29795000  | 0 | 8825100  | 100 |
| Q13243 | SRSF5    | 3  | 23.51  | 122880000 | 0 | 56658000 | 100 |
| Q13247 | SRSF6    | 5  | 130.77 | 90518000  | 0 | 13995000 | 100 |
| Q13263 | TRIM28   | 5  | 104    | 87560000  | 0 | 25934000 | 100 |
| Q13509 | TUBB3    | 1  | 24.095 | 25009000  | 0 | 4072200  | 100 |
| Q13601 | KRR1     | 1  | 6.2017 | 14057000  | 0 | 2451600  | 100 |
| Q13751 | LAMB3    | 5  | 48.316 | 52591000  | 0 | 4999600  | 100 |
| Q13823 | GNL2     | 3  | 26.7   | 25732000  | 0 | 7621500  | 100 |
| Q14134 | TRIM29   | 3  | 16.972 | 20532000  | 0 | 5153200  | 100 |
| Q14142 | TRIM14   | 2  | 12.427 | 16889000  | 0 | 1833600  | 100 |
| Q14204 | DYNC1H1  | 6  | 67.423 | 38656000  | 0 | 1989500  | 100 |

Supplementary Table S5\_PUR -interacting proteins

|        |           |    |        |           |   |           |     |
|--------|-----------|----|--------|-----------|---|-----------|-----|
| Q14210 | LY6D      | 2  | 24.118 | 50354000  | 0 | 17246000  | 100 |
| Q14566 | MCM6      | 2  | 11.694 | 11344000  | 0 | 3360000   | 100 |
| Q14651 | PLS1      | 2  | 20.208 | 19264000  | 0 | 3465400   | 100 |
| Q14669 | TRIP12    | 6  | 58.248 | 111020000 | 0 | 8633200   | 100 |
| Q14676 | MDC1      | 2  | 14.43  | 10724000  | 0 | 869880    | 100 |
| Q14690 | PDCD11    | 8  | 124.74 | 107390000 | 0 | 7226100   | 100 |
| Q14966 | ZNF638    | 3  | 20.166 | 20162000  | 0 | 2898400   | 100 |
| Q14974 | KPNB1     | 7  | 49.887 | 478060000 | 0 | 137660000 | 100 |
| Q15007 | WTAP      | 2  | 18.184 | 39064000  | 0 | 9398100   | 100 |
| Q15046 | KARS      | 1  | 7.8177 | 4464700   | 0 | 1322400   | 100 |
| Q15050 | RRS1      | 3  | 28.145 | 21319000  | 0 | 2314500   | 100 |
| Q15056 | EIF4H     | 1  | 18.375 | 3804400   | 0 | 3747800   | 100 |
| Q15365 | PCBP1     | 1  | 6.0388 | 6147800   | 0 | 3295500   | 100 |
| Q15393 | SF3B3     | 3  | 29.257 | 50943000  | 0 | 4132200   | 100 |
| Q15398 | DLGAP5    | 3  | 16.781 | 10976000  | 0 | 3251000   | 100 |
| Q15427 | SF3B4     | 1  | 6.9859 | 13762000  | 0 | 911850    | 100 |
| Q16891 | IMMT      | 11 | 82.894 | 103680000 | 0 | 29084000  | 100 |
| Q1ED39 | KNOP1     | 2  | 20.703 | 39123000  | 0 | 6945100   | 100 |
| Q27J81 | INF2      | 7  | 86.743 | 101280000 | 0 | 6276100   | 100 |
| Q4G0S7 | CCDC152   | 1  | 6.1732 | 2768500   | 0 | 694830    | 100 |
| Q4KMQ1 | TPRN      | 2  | 22.13  | 8831400   | 0 | 2615800   | 100 |
| Q4VXZ8 | DECR2     | 1  | 6.2322 | 1762700   | 0 | 1736500   | 100 |
| Q53G59 | KLHL12    | 5  | 34.73  | 69361000  | 0 | 15678000  | 100 |
| Q562R1 | ACTBL2    | 2  | 14.257 | 35909000  | 0 | 2646900   | 100 |
| Q58FF8 | HSP90AB2P | 1  | 7.0414 | 4890200   | 0 | 1448400   | 100 |
| Q5BKZ1 | ZNF326    | 1  | 6.0522 | 19902000  | 0 | 4007400   | 100 |
| Q5EBL8 | PDZD11    | 1  | 11.471 | 16676000  | 0 | 6834300   | 100 |
| Q5JR04 | MOV10     | 2  | 11.962 | 12041000  | 0 | 3566400   | 100 |
| Q5RKV6 | EXOSC6    | 1  | 11.837 | 11524000  | 0 | 4067800   | 100 |
| Q5SSJ5 | HP1BP3    | 4  | 36.315 | 90169000  | 0 | 20683000  | 100 |
| Q5T0W9 | FAM83B    | 3  | 28.93  | 29519000  | 0 | 8457900   | 100 |
| Q5VY93 | ARHGEF2   | 2  | 11.946 | 6874700   | 0 | 1612200   | 100 |
| Q68D10 | SPTY2D1   | 1  | 6.6001 | 13931000  | 0 | 3839000   | 100 |
| Q69YN4 | VIRMA     | 7  | 45.963 | 59488000  | 0 | 4825400   | 100 |
| Q69YQ0 | SPECC1L   | 7  | 66.432 | 111330000 | 0 | 9367000   | 100 |
| Q6P2Q9 | PRPF8     | 7  | 59.123 | 74281000  | 0 | 5101600   | 100 |
| Q6PKG0 | LARP1     | 5  | 37.548 | 52123000  | 0 | 4227900   | 100 |
| Q6SPF0 | SAMD1     | 7  | 65.54  | 227360000 | 0 | 66354000  | 100 |
| Q96J85 | LARP4     | 4  | 34.768 | 50253000  | 0 | 13126000  | 100 |
| Q7Z2T5 | TRMT1L    | 2  | 18.926 | 18715000  | 0 | 4310800   | 100 |
| Q7Z2W4 | ZC3HAV1   | 2  | 17.147 | 26846000  | 0 | 4924600   | 100 |
| Q7Z417 | NUFIP2    | 2  | 10.813 | 3536400   | 0 | 1047500   | 100 |
| Q7Z478 | DHX29     | 1  | 6.0609 | 3213100   | 0 | 260630    | 100 |
| Q7Z6E9 | RBBP6     | 1  | 5.9623 | 3864200   | 0 | 313440    | 100 |
| Q7Z7K6 | CENPV     | 1  | 26.474 | 44795000  | 0 | 21462000  | 100 |
| Q86VH2 | KIF27     | 1  | 11.334 | 57862000  | 0 | 7765800   | 100 |
| Q86XZ4 | SPATS2    | 5  | 68.278 | 136500000 | 0 | 38363000  | 100 |
| Q8IY81 | FTSJ3     | 2  | 12.418 | 20980000  | 0 | 1701800   | 100 |
| Q8N0Z8 | PUSL1     | 1  | 8.7524 | 4760900   | 0 | 2552100   | 100 |
| Q8N9B5 | JMY       | 1  | 9.8219 | 12239000  | 0 | 3458700   | 100 |
| Q8NDT2 | RBM15B    | 3  | 26.693 | 27359000  | 0 | 8103400   | 100 |
| Q8NDX5 | PHC3      | 3  | 43.589 | 44856000  | 0 | 8603600   | 100 |
| Q8NI77 | KIF18A    | 1  | 16.691 | 15974000  | 0 | 4731200   | 100 |
| Q8TA86 | RP9       | 1  | 6.5448 | 6288100   | 0 | 3370700   | 100 |
| Q8WWM7 | ATXN2L    | 2  | 12.382 | 12592000  | 0 | 1021400   | 100 |
| Q8WXF1 | PSPC1     | 1  | 10.482 | 7470300   | 0 | 1874900   | 100 |

Supplementary Table S5\_PUR -interacting proteins

|        |         |    |        |           |   |           |     |
|--------|---------|----|--------|-----------|---|-----------|-----|
| Q8WXX5 | DNAJC9  | 2  | 10.877 | 32301000  | 0 | 13014000  | 100 |
| Q8WY91 | THAP4   | 1  | 9.1204 | 4101800   | 0 | 1214900   | 100 |
| Q92499 | DDX1    | 3  | 17.724 | 19218000  | 0 | 4468600   | 100 |
| Q92616 | GCN1L1  | 2  | 14.129 | 4929000   | 0 | 399810    | 100 |
| Q92828 | CORO2A  | 4  | 34.255 | 108790000 | 0 | 21365000  | 100 |
| Q92979 | EMG1    | 1  | 6.497  | 23747000  | 0 | 19141000  | 100 |
| Q969L2 | MAL2    | 1  | 22.141 | 21631000  | 0 | 7829100   | 100 |
| Q96A35 | MRPL24  | 1  | 6.0046 | 4182000   | 0 | 4119800   | 100 |
| Q96GD4 | AURKB   | 5  | 44.713 | 139730000 | 0 | 72355000  | 100 |
| Q96GQ7 | DDX27   | 4  | 22.286 | 36917000  | 0 | 10934000  | 100 |
| Q96GY0 | ZC2HC1A | 3  | 28.393 | 25562000  | 0 | 12277000  | 100 |
| Q9Y383 | LUC7L2  | 1  | 8.557  | 8852800   | 0 | 4745500   | 100 |
| Q96JM7 | L3MBTL3 | 5  | 33.933 | 52127000  | 0 | 15439000  | 100 |
| Q96PH1 | NOX5    | 1  | 6.464  | 231050000 | 0 | 24193000  | 100 |
| Q96QR8 | PURB    | 6  | 36.551 | 148350000 | 0 | 79522000  | 100 |
| Q96T37 | RBM15   | 7  | 63.951 | 138370000 | 0 | 40984000  | 100 |
| Q96T51 | RUFY1   | 3  | 18.442 | 27362000  | 0 | 7904700   | 100 |
| Q96TA2 | YME1L1  | 1  | 6.3503 | 7377100   | 0 | 1851500   | 100 |
| Q99459 | CDC5L   | 4  | 24.684 | 22922000  | 0 | 6789200   | 100 |
| Q99496 | RNF2    | 4  | 35.813 | 76368000  | 0 | 38359000  | 100 |
| Q99575 | POP1    | 1  | 6.1404 | 5924900   | 0 | 480600    | 100 |
| Q99832 | CCT7    | 3  | 18.972 | 22817000  | 0 | 5726500   | 100 |
| Q99959 | PKP2    | 1  | 7.4748 | 8669800   | 0 | 2567900   | 100 |
| Q9BPX5 | ARPC5L  | 2  | 12.736 | 21567000  | 0 | 8838600   | 100 |
| Q9BQ67 | GRWD1   | 3  | 16.88  | 19233000  | 0 | 4827100   | 100 |
| Q9BU76 | MMTAG2  | 1  | 6.3448 | 14283000  | 0 | 7656400   | 100 |
| F5H303 | NOC4L   | 3  | 94.781 | 45659000  | 0 | 10192000  | 100 |
| Q9BYX7 | POTEKP  | 1  | 14.667 | 40332000  | 0 | 2693100   | 100 |
| Q9GZR2 | REXO4   | 1  | 8.4283 | 7741900   | 0 | 1943100   | 100 |
| Q9H4H8 | FAM83D  | 5  | 39.435 | 56561000  | 0 | 12444000  | 100 |
| Q9H4P4 | RNF41   | 1  | 6.5163 | 12161000  | 0 | 6519000   | 100 |
| Q9H7Z6 | KAT8    | 2  | 12.93  | 27659000  | 0 | 6941900   | 100 |
| Q9HAU0 | PLEKHA5 | 3  | 17.72  | 18388000  | 0 | 4599100   | 100 |
| Q9HC52 | CBX8    | 4  | 50.98  | 43753000  | 0 | 4750100   | 100 |
| Q9NQT5 | EXOSC3  | 1  | 11.611 | 23116000  | 0 | 8185200   | 100 |
| Q9NQX4 | MYO5C   | 4  | 45.121 | 64418000  | 0 | 3967400   | 100 |
| Q9NR48 | ASH1L   | 4  | 24.363 | 30039000  | 0 | 15694000  | 100 |
| Q9NSI2 | FAM207A | 1  | 5.9472 | 9541700   | 0 | 9399700   | 100 |
| Q9NUQ6 | SPATS2L | 6  | 47.344 | 78595000  | 0 | 20070000  | 100 |
| Q9NW13 | RBM28   | 9  | 55.423 | 79828000  | 0 | 22223000  | 100 |
| Q9NZB2 | FAM120A | 1  | 9.782  | 10338000  | 0 | 838570    | 100 |
| Q9NZM5 | NOP53   | 4  | 34.073 | 59440000  | 0 | 12634000  | 100 |
| Q9P015 | MRPL15  | 2  | 13.076 | 9068000   | 0 | 4860800   | 100 |
| Q9P0L2 | MARK1   | 1  | 9.5168 | 5947400   | 0 | 1761600   | 100 |
| Q9UBU9 | NXF1    | 15 | 170.27 | 404060000 | 0 | 111050000 | 100 |
| Q9UDY2 | TJP2    | 7  | 56.216 | 52345000  | 0 | 3688000   | 100 |
| Q9UHB7 | AFF4    | 12 | 136.31 | 208980000 | 0 | 37557000  | 100 |
| Q9UJW0 | DCTN4   | 1  | 6.8032 | 10480000  | 0 | 2630200   | 100 |
| Q9UK80 | USP21   | 2  | 13.464 | 11641000  | 0 | 2921600   | 100 |
| Q9UKS6 | PACSN3  | 3  | 23.123 | 32446000  | 0 | 6671100   | 100 |
| Q9UKX7 | NUP50   | 2  | 15.533 | 9940000   | 0 | 2494700   | 100 |
| Q9UM54 | MYO6    | 1  | 14.676 | 23798000  | 0 | 1930300   | 100 |
| Q9UMN6 | KMT2B   | 1  | 6.3134 | 3192500   | 0 | 945590    | 100 |
| Q9UMS4 | PRPF19  | 4  | 37.949 | 52487000  | 0 | 11999000  | 100 |
| Q9UN86 | G3BP2   | 1  | 10.805 | 9335100   | 0 | 2342900   | 100 |
| Q9UQ35 | SRRM2   | 32 | 323.31 | 1.094E+09 | 0 | 114630000 | 100 |



Supplementary Table S5\_PUR -interacting proteins

|        |         |    |        |           |          |           |             |
|--------|---------|----|--------|-----------|----------|-----------|-------------|
| Q9Y230 | RUVBL2  | 4  | 22.582 | 45917000  | 0        | 11524000  | 100         |
| Q9Y2W1 | THRAP3  | 4  | 23.368 | 22929000  | 0        | 2707000   | 100         |
| Q9Y2X3 | NOP58   | 6  | 58.946 | 33954000  | 0        | 7781100   | 100         |
| Q9Y3A4 | RRP7A   | 2  | 11.551 | 16507000  | 0        | 8848700   | 100         |
| Q9Y3B9 | RRP15   | 2  | 11.879 | 14964000  | 0        | 7005800   | 100         |
| Q9Y3I0 | RTCB    | 1  | 7.1517 | 6288700   | 0        | 1578300   | 100         |
| Q9Y3T9 | NOC2L   | 2  | 14.214 | 8465200   | 0        | 2507300   | 100         |
| Q9Y3U8 | RPL36   | 2  | 10.792 | 38533000  | 0        | 15792000  | 100         |
| Q9Y446 | PKP3    | 4  | 35.626 | 60049000  | 0        | 15974000  | 100         |
| Q9Y4B5 | MTCL1   | 2  | 12.299 | 14621000  | 0        | 1186000   | 100         |
| Q9Y6J9 | TAF6L   | 4  | 30.232 | 24860000  | 0        | 6530600   | 100         |
| Q9Y6N5 | SQRDL   | 2  | 20.914 | 23784000  | 0        | 2582100   | 100         |
| Q00577 | PURA    | 7  | 215.91 | 1.867E+09 | 6585600  | 239480000 | 36.36418853 |
| Q9H6R0 | DHX33   | 13 | 231.53 | 360190000 | 6465500  | 102470000 | 15.8487356  |
| Q9N2T1 | CALML5  | 6  | 101.44 | 576580000 | 33756000 | 404710000 | 11.98927598 |
| Q9H6W3 | RIOX1   | 7  | 68.56  | 142410000 | 4806600  | 38671000  | 8.045395914 |
| P19013 | KRT4    | 6  | 78.975 | 161490000 | 12590000 | 65496000  | 5.202223987 |
| Q9NUL7 | DDX28   | 11 | 173.35 | 252210000 | 12147000 | 57236000  | 4.711945336 |
| Q5T3I0 | GPATCH4 | 5  | 57.997 | 90929000  | 4582600  | 21457000  | 4.682276437 |
| P62266 | RPS23   | 5  | 29.56  | 116590000 | 11316000 | 51206000  | 4.525097207 |
| P11940 | PABPC1  | 13 | 284.93 | 933970000 | 58985000 | 219920000 | 3.728405527 |
| P40429 | RPL13A  | 6  | 88.062 | 405780000 | 91651000 | 330630000 | 3.60748928  |
| P52292 | KPNA2   | 6  | 46.339 | 107280000 | 6374400  | 22856000  | 3.585592369 |
| Q16629 | SRSF7   | 4  | 41.355 | 140950000 | 20761000 | 68829000  | 3.315302731 |
| P42766 | RPL35   | 5  | 41.953 | 114150000 | 12111000 | 38240000  | 3.15746016  |
| Q96HP0 | DOCK6   | 7  | 69.634 | 110070000 | 2372100  | 7187000   | 3.029804814 |
| Q14980 | NUMA1   | 57 | 323.31 | 3.724E+09 | 85515000 | 255350000 | 2.986025843 |
| Q6YHK3 | CD109   | 10 | 118.51 | 216530000 | 13457000 | 39847000  | 2.961061158 |
| Q13310 | PABPC4  | 8  | 70.062 | 248090000 | 21059000 | 58016000  | 2.754926635 |
| Q9BXS6 | NUSAP1  | 13 | 127.12 | 395550000 | 33647000 | 90629000  | 2.69352394  |
| Q07955 | SRSF1   | 6  | 57.822 | 179390000 | 29599000 | 73359000  | 2.478428325 |
| P35222 | CTNNB1  | 7  | 165.79 | 158200000 | 14464000 | 35496000  | 2.45409292  |
| Q86YZ3 | HRNR    | 9  | 156.94 | 454800000 | 89622000 | 213660000 | 2.384012854 |
| P56539 | CAV1    | 2  | 92.588 | 168420000 | 53625000 | 118350000 | 2.206993007 |
| P62854 | RPS26   | 2  | 14.499 | 25491000  | 4084600  | 8777000   | 2.14880282  |
| O00567 | NOP56   | 11 | 189.31 | 342030000 | 36329000 | 77016000  | 2.119959261 |
| E9PPU1 | RPS3    | 8  | 75.524 | 622500000 | 2.03E+08 | 419960000 | 2.070094149 |
| P46781 | RPS9    | 6  | 39.22  | 253460000 | 87774000 | 181050000 | 2.06268371  |
| P38646 | HSPA9   | 12 | 104.09 | 587430000 | 61009000 | 125210000 | 2.052320149 |
| O43143 | DHX15   | 9  | 81.622 | 133900000 | 13780000 | 28122000  | 2.040783745 |
| P62861 | FAU     | 2  | 11.269 | 39652000  | 17912000 | 35949000  | 2.006978562 |
| P35221 | CTNNA1  | 17 | 323.31 | 509290000 | 56743000 | 112660000 | 1.985443138 |
| P62906 | RPL10A  | 6  | 323.31 | 259550000 | 96949000 | 191430000 | 1.974543317 |
| P46940 | IQGAP1  | 6  | 72.271 | 86484000  | 3143600  | 6102200   | 1.941150274 |
| Q9Y2R4 | DDX52   | 7  | 80.503 | 117100000 | 11369000 | 22058000  | 1.940188231 |
| P26373 | RPL13   | 11 | 289.33 | 767290000 | 2.84E+08 | 536590000 | 1.892533418 |
| Q5JR95 | RPS8    | 7  | 255.95 | 240190000 | 1.04E+08 | 189860000 | 1.826279338 |
| Q7KZI7 | MARK2   | 5  | 60.641 | 56640000  | 6486900  | 11771000  | 1.814580154 |
